# Supplementary material for: CB1-receptor-mediated inhibitory LTD triggers presynaptic remodeling via protein synthesis and ubiquitination
Source: eLife journal article supplement (doi:10.7554/elife.54812), 2020-09-09
Supplement: supp [file elife-54812-supp-v1.zip]

Archive with 9 entries (9 files):
- elife_poa_e54812_Figure_1_figure_supplement_1.pdf
- elife_poa_e54812_Figure_1_figure_supplement_2.pdf
- elife_poa_e54812_Figure_2_figure_supplement_1.pdf
- elife_poa_e54812_Figure_2_figure_supplement_2.pdf
- elife_poa_e54812_Figure_3_figure_supplement_1.pdf
- elife_poa_e54812_Figure_5_figure_supplement_1.pdf
- elife_poa_e54812_Transparent_Reporting_File.pdf
- elife_poa_e54812_Supplementary_file_1.xlsx
- elife_poa_e54812_Supplementary_file_2.xlsx
