# Supplementary material for: CB1-receptor-mediated inhibitory LTD triggers presynaptic remodeling via protein synthesis and ubiquitination
Source: eLife journal article supplement (doi:10.7554/elife.54812), 2020-09-09
Supplement: supp [file elife-54812-supp-v1.zip › elife_poa_e54812_Supplementary_file_1.xlsx]

## Sheet: Sheet1
Identified Proteins	Accession Number	Gene name	Molecular Weight	Log2(WIN / Reference)	HeavyVehicle (Forward)	Std Dev(HeavyVehicle-Forward)	MediumVehicle (Reverse)	Std Dev(MediumVehicle - Reverse)	HeavyWIN (Forward)	Std Dev (HeavyWIN - Forward)	MediumWIN (Reverse)	Std Dev (MediumWIN - Reverse)	T-Test (p-value)	adjusted_pval	combined_score
Cluster of Vimentin OS=Rattus norvegicus GN=Vim PE=1 SV=2 (VIME_RAT)	VIME_RAT [41]	Vim	54 kDa	0.67	0	0.45447	0	0.58271	0.6576	1.49011	0.6871	1.1786	0.000480928	0.0144844	2.83724
Cluster of Tubulin alpha-1A chain OS=Rattus norvegicus GN=Tuba1a PE=1 SV=1 (TBA1A_RAT)	TBA1A_RAT [8]	Tuba1a	50 kDa	0.03	0	0.394101	0	0.391517	0.25	0.942259	-0.2993	0.623597	0.936664	0.955323	0.00137118
Cluster of Tubulin beta-3 chain OS=Rattus norvegicus GN=Tubb3 PE=1 SV=1 (TBB3_RAT)	TBB3_RAT [7]	Tubb3	50 kDa	-0.16	0	0.395028	0	0.394781	-0.1342	0.612476	-0.1769	0.464216	0.0183227	0.0705356	-0.424262
Cluster of Sodium/potassium-transporting ATPase subunit alpha-3 OS=Rattus norvegicus GN=Atp1a3 PE=1 SV=2 (AT1A3_RAT)	AT1A3_RAT [6]	Atp1a3	112 kDa	-0.4	0	0.394393	0	0.391691	-0.4324	0.638136	-0.3624	0.669017	0.00766766	0.0429346	-1.25923
Cluster of Heat shock cognate 71 kDa protein OS=Rattus norvegicus GN=Hspa8 PE=1 SV=1 (HSP7C_RAT)	HSP7C_RAT [6]	Hspa8	71 kDa	0.07	0	0.392955	0	0.39467	0.0536	0.439673	0.0811	0.42989	0.0392431	0.101992	0.1598
Clathrin heavy chain 1 OS=Rattus norvegicus GN=Cltc PE=1 SV=3	CLH1_RAT	Cltc	192 kDa	-0.3	0	0.394962	0	0.392506	-0.5383	1.32301	-0.036	0.495945	0.3713	0.477652	-0.221662
Cluster of Actin, alpha skeletal muscle OS=Rattus norvegicus GN=Acta1 PE=1 SV=1 (ACTS_RAT)	ACTS_RAT [6]	Acta1	42 kDa	0.18	0	0.391686	0	0.388605	0.456	0.582161	0.131	0.545893	0.212644	0.315575	0.207604
Cluster of Neural cell adhesion molecule 1 OS=Rattus norvegicus GN=Ncam1 PE=1 SV=1 (NCAM1_RAT)	NCAM1_RAT [2]	Ncam1	95 kDa	-0.37	0	0.393506	0	0.391601	-0.525	0.507561	-0.3124	0.476701	0.0588256	0.129179	-0.757227
Cluster of Spectrin alpha chain, non-erythrocytic 1 OS=Rattus norvegicus GN=Sptan1 PE=1 SV=2 (SPTN1_RAT)	SPTN1_RAT [3]	Sptan1	285 kDa	0.29	0	0.394883	0	0.391848	-0.061	0.413255	0.2988	0.703183	0.576611	0.651711	0.124165
ATP synthase subunit alpha, mitochondrial OS=Rattus norvegicus GN=Atp5a1 PE=1 SV=2	ATPA_RAT	Atp5a1	60 kDa	-0.05	0	0.39214	0	0.39577	0.1391	0.778485	-0.1773	0.479783	0.914938	0.944452	-0.00285751
ATP synthase subunit beta, mitochondrial OS=Rattus norvegicus GN=Atp5b PE=1 SV=2	ATPB_RAT	Atp5b	56 kDa	0.27	0	0.394991	0	0.393423	0.4031	1.00194	0.1261	0.606	0.196252	0.299051	0.325929
Cytoplasmic dynein 1 heavy chain 1 OS=Rattus norvegicus GN=Dync1h1 PE=1 SV=1	DYHC1_RAT	Dync1h1	532 kDa	-0.07	0	0.418585	0	0.426762	-0.2731	1.02183	0.1866	0.461955	0.868109	0.907085	-0.00682633
60 kDa heat shock protein, mitochondrial OS=Rattus norvegicus GN=Hspd1 PE=1 SV=1	CH60_RAT	Hspd1	61 kDa	-0.14	0	0.392392	0	0.392621	-0.1781	0.488429	-0.1014	0.42455	0.0677429	0.14085	-0.274409
Cluster of ADP/ATP translocase 1 OS=Rattus norvegicus GN=Slc25a4 PE=1 SV=3 (ADT1_RAT)	ADT1_RAT [4]	Slc25a4	33 kDa	-0.28	0	0.395024	0	0.395552	-0.3881	0.459757	-0.1807	0.464476	0.11121	0.201445	-0.448626
Cluster of PREDICTED: spectrin beta chain, non-erythrocytic 1 isoform X1 [Rattus norvegicus] (gi|672077311)	gi|672077311 [8]		?	-0.28	0	0.399485	0	0.391487	-0.4882	0.682413	0.1091	0.522635	0.590551	0.663075	-0.115043
Aconitate hydratase, mitochondrial OS=Rattus norvegicus GN=Aco2 PE=1 SV=2	ACON_RAT	Aco2	85 kDa	-0.38	0	0.390693	0	0.394315	-0.4108	0.440035	-0.3463	0.497895	0.00717986	0.0417737	-1.20669
Cluster of Glyceraldehyde-3-phosphate dehydrogenase OS=Rattus norvegicus GN=Gapdh PE=1 SV=3 (G3P_RAT)	G3P_RAT [3]	Gapdh	36 kDa	0.04	0	0.391427	0	0.391889	0.0894	0.463922	-0.0232	0.438037	0.616127	0.68727	0.0150011
Endoplasmin OS=Rattus norvegicus GN=Hsp90b1 PE=1 SV=2	ENPL_RAT	Hsp90b1	93 kDa	0.15	0	0.399567	0	0.394827	0.125	0.411112	0.1708	0.434426	0.0231446	0.0795305	0.379742
Cluster of Myosin-10 OS=Rattus norvegicus GN=Myh10 PE=1 SV=1 (MYH10_RAT)	MYH10_RAT [9]	Myh10	229 kDa	0.42	0	0.414897	0	0.395186	-0.1417	0.526118	0.6955	0.807371	0.576313	0.651711	0.179825
Cluster of Histone H3.3 OS=Rattus norvegicus GN=H3f3b PE=1 SV=2 (H33_RAT)	H33_RAT [6]	H3f3b	15 kDa	0.59	0	0.407354	0	0.389867	0.7851	0.39216	0.5759	0.585064	0.0228212	0.0795305	1.49365
Contactin-1 OS=Rattus norvegicus GN=Cntn1 PE=1 SV=2	CNTN1_RAT	Cntn1	113 kDa	-0.52	0	0.393907	0	0.39275	-0.5422	0.456353	-0.4935	0.480892	0.0022037	0.0275194	-1.86829
Cluster of Heat shock protein HSP 90-beta OS=Rattus norvegicus GN=Hsp90ab1 PE=1 SV=4 (HS90B_RAT)	HS90B_RAT [3]	Hsp90ab1	83 kDa	0.29	0	0.391471	0	0.391683	0.2563	0.44857	0.3174	0.489002	0.0111532	0.0531526	0.85103
Cluster of Microtubule-associated protein 1B OS=Rattus norvegicus GN=Map1b PE=1 SV=2 (MAP1B_RAT)	MAP1B_RAT [3]	Map1b	270 kDa	-0.35	0	0.393657	0	0.388647	-0.5855	0.55014	-0.3321	0.507259	0.0685166	0.141454	-0.684524
Creatine kinase B-type OS=Rattus norvegicus GN=Ckb PE=1 SV=2	KCRB_RAT	Ckb	43 kDa	0.52	0	0.394332	0	0.392298	0.6141	0.725967	0.4181	0.460233	0.0342167	0.096369	1.21658
Trifunctional enzyme subunit alpha, mitochondrial OS=Rattus norvegicus GN=Hadha PE=1 SV=2	ECHA_RAT	Hadha	83 kDa	0.13	0	0.391228	0	0.390407	0.132	0.472612	0.1319	0.456649	1.43589e-07	7.35176e-05	1.23734
Transitional endoplasmic reticulum ATPase OS=Rattus norvegicus GN=Vcp PE=1 SV=3	TERA_RAT	Vcp	89 kDa	0.2	0	0.392499	0	0.391466	0.1025	0.622076	0.3177	0.487083	0.190109	0.2923	0.245995
Heat shock protein HSP 90-alpha OS=Rattus norvegicus GN=Hsp90aa1 PE=1 SV=3	HS90A_RAT	Hsp90aa1	85 kDa	0.38	0	0.391657	0	0.393655	0.2965	0.520661	0.4484	0.411534	0.0391572	0.101992	0.867486
Cluster of Hexokinase-1 OS=Rattus norvegicus GN=Hk1 PE=1 SV=4 (HXK1_RAT)	HXK1_RAT [4]	Hk1	102 kDa	-0.04	0	0.393697	0	0.39297	0.9423	0.489897	-0.1333	0.498325	0.530437	0.617236	-0.0193002
Stress-70 protein, mitochondrial OS=Rattus norvegicus GN=Hspa9 PE=1 SV=3	GRP75_RAT	Hspa9	74 kDa	-0.27	0	0.39305	0	0.39723	-0.2864	0.441749	-0.246	0.408145	0.00570894	0.0364611	-0.894108
Malate dehydrogenase, mitochondrial OS=Rattus norvegicus GN=Mdh2 PE=1 SV=2	MDHM_RAT	Mdh2	36 kDa	-0.24	0	0.395369	0	0.392837	-0.2833	0.472609	-0.1811	0.489217	0.0451739	0.110523	-0.528608
Cluster of Histone H2A type 2-A OS=Rattus norvegicus GN=Hist2h2aa3 PE=1 SV=1 (H2A2A_RAT)	H2A2A_RAT [6]	Hist2h2aa3	14 kDa	0.72	0	0.392398	0	0.390922	0.8505	0.42727	0.561	0.497159	0.0395854	0.102362	1.64105
Cluster of Plasma membrane calcium-transporting ATPase 1 OS=Rattus norvegicus GN=Atp2b1 PE=1 SV=2 (AT2B1_RAT)	AT2B1_RAT [4]	Atp2b1	139 kDa	-0.62	0	0.393921	0	0.391648	-0.6296	0.584349	-0.6096	0.459723	0.00026038	0.0121195	-2.73602
Voltage-dependent anion-selective channel protein 1 OS=Rattus norvegicus GN=Vdac1 PE=1 SV=4	VDAC1_RAT	Vdac1	31 kDa	-0.2	0	0.394881	0	0.393433	-0.2142	0.617831	-0.1914	0.455272	0.003145	0.0321593	-0.687411
Cluster of PREDICTED: dihydropyrimidinase-related protein 2 isoform X1 [Rattus norvegicus] (gi|564386472)	gi|564386472 [2]		?	-0.22	0	0.396002	0	0.401979	-0.8596	0.416801	-0.1386	0.617016	0.300449	0.408736	-0.196831
Cluster of Keratin, type I cytoskeletal 10 OS=Rattus norvegicus GN=Krt10 PE=3 SV=1 (K1C10_RAT)	K1C10_RAT [2]	Krt10	57 kDa	1.39	0	0.89024	0	1.06744	0.4299	4.13912	2.4124	3.53022	0.288073	0.396487	1.2859
Cluster of Dihydropyrimidinase-related protein 5 OS=Rattus norvegicus GN=Dpysl5 PE=1 SV=1 (DPYL5_RAT)	DPYL5_RAT [2]	Dpysl5	62 kDa	-0.37	0	0.394403	0	0.394885	-0.4216	0.572994	-0.3354	0.461347	0.0127196	0.0565951	-1.06258
Peptidyl-prolyl cis-trans isomerase A OS=Rattus norvegicus GN=Ppia PE=1 SV=2	PPIA_RAT (+1)	Ppia	18 kDa	0.12	0	0.392634	0	0.393837	0.1244	0.484548	0.1109	0.457946	0.00327556	0.0321593	0.412447
ATP synthase subunit O, mitochondrial OS=Rattus norvegicus GN=Atp5o PE=1 SV=1	ATPO_RAT	Atp5o	23 kDa	-0.14	0	0.392408	0	0.394148	-0.0848	0.539237	-0.2041	0.483916	0.136469	0.233686	-0.203528
Cluster of Ras-related protein Rab-1A OS=Rattus norvegicus GN=Rab1A PE=1 SV=3 (RAB1A_RAT)	RAB1A_RAT [20]	Rab1A	23 kDa	-0.34	0	0.391794	0	0.394153	-0.3006	0.56592	-0.3826	0.597497	0.0141016	0.0591806	-0.961235
Cluster of 14-3-3 protein epsilon OS=Rattus norvegicus GN=Ywhae PE=1 SV=1 (1433E_RAT)	1433E_RAT [2]	Ywhae	29 kDa	0.17	0	0.392033	0	0.393726	0.2397	0.536466	0.1416	0.4304	0.0602698	0.129179	0.347915
Dihydropyrimidinase-related protein 3 OS=Rattus norvegicus GN=Dpysl3 PE=1 SV=2	DPYL3_RAT	Dpysl3	62 kDa	-0.34	0	0.396596	0	0.395898	-0.388	0.506636	-0.2844	0.491592	0.0229259	0.0795305	-0.860749
Cluster of Ubiquitin-like modifier-activating enzyme 1 OS=Rattus norvegicus GN=Uba1 PE=1 SV=1 (UBA1_RAT)	UBA1_RAT [2]	Uba1	118 kDa	-0.06	0	0.396979	0	0.392168	-0.1624	0.484532	0.0384	0.460036	0.599828	0.671234	-0.0239183
4F2 cell-surface antigen heavy chain OS=Rattus norvegicus GN=Slc3a2 PE=1 SV=1	4F2_RAT	Slc3a2	58 kDa	0.2	0	0.394791	0	0.39198	0.1348	0.464652	0.2704	0.552182	0.0961159	0.183743	0.338843
Neurofilament medium polypeptide OS=Rattus norvegicus GN=Nefm PE=1 SV=4	NFM_RAT	Nefm	96 kDa	-0.81	0	0.391985	0	0.39117	-0.7712	0.448048	-0.855	0.64855	0.00264493	0.0289318	-2.86968
Elongation factor 2 OS=Rattus norvegicus GN=Eef2 PE=1 SV=4	EF2_RAT	Eef2	95 kDa	0.11	0	0.400638	0	0.395042	0.0718	0.416264	0.1602	0.444312	0.119677	0.21202	0.170618
Calnexin OS=Rattus norvegicus GN=Canx PE=1 SV=1	CALX_RAT	Canx	67 kDa	0.15	0	0.39199	0	0.394764	0.2629	0.464916	0.0543	0.430443	0.267739	0.373521	0.147717
Vesicle-fusing ATPase OS=Rattus norvegicus GN=Nsf PE=1 SV=1	NSF_RAT	Nsf	83 kDa	-0.65	0	0.389312	0	0.391566	-0.6593	0.46732	-0.6365	0.495981	0.000309451	0.0132032	-2.81274
Cluster of ADP-ribosylation factor 1 OS=Rattus norvegicus GN=Arf1 PE=1 SV=2 (ARF1_RAT)	ARF1_RAT [6]	Arf1	21 kDa	-0.04	0	0.391176	0	0.393078	0.0125	0.427756	-0.12	0.436787	0.502383	0.598341	-0.0205438
NADH-ubiquinone oxidoreductase 75 kDa subunit, mitochondrial OS=Rattus norvegicus GN=Ndufs1 PE=1 SV=1	NDUS1_RAT	Ndufs1	79 kDa	-0.35	0	0.393377	0	0.392348	-0.4146	0.499506	-0.2921	0.46496	0.0287573	0.0880895	-0.850291
Plectin OS=Rattus norvegicus GN=Plec PE=1 SV=2	PLEC_RAT	Plec	534 kDa	0.52	0	0.408657	0	0.392356	0.4238	0.728724	0.5945	3.37289	0.026969	0.0863008	1.27396
Fatty acid synthase OS=Rattus norvegicus GN=Fasn PE=1 SV=3	FAS_RAT	Fasn	273 kDa	-0.05	0	0.396598	0	0.398311	-0.2289	0.509245	0.2072	0.449539	0.964837	0.972434	-0.00139766
ATP synthase F(0) complex subunit B1, mitochondrial OS=Rattus norvegicus GN=Atp5f1 PE=1 SV=1	AT5F1_RAT	Atp5f1	29 kDa	-0.16	0	0.39271	0	0.392655	-0.1644	0.436607	-0.1548	0.423933	0.000903292	0.0165173	-0.656535
Syntaxin-binding protein 1 OS=Rattus norvegicus GN=Stxbp1 PE=1 SV=1	STXB1_RAT	Stxbp1	68 kDa	-0.59	0	0.391893	0	0.392526	-0.6359	0.461521	-0.5326	0.500277	0.00772482	0.0429346	-1.85737
Cluster of PREDICTED: guanine nucleotide-binding protein G(o) subunit alpha isoform X2 [Rattus norvegicus] (gi|672084188)	gi|672084188 [8]		?	-0.2	0	0.393513	0	0.401587	-0.2614	0.571175	-0.0296	0.497688	0.336134	0.442419	-0.1631
Cluster of Elongation factor 1-alpha 1 OS=Rattus norvegicus GN=Eef1a1 PE=2 SV=1 (EF1A1_RAT)	EF1A1_RAT [2]	Eef1a1	50 kDa	0.09	0	0.393182	0	0.399735	0.0301	0.745029	0.2119	0.403585	0.314606	0.420569	0.0779531
Cluster of Heterogeneous nuclear ribonucleoprotein A1 OS=Rattus norvegicus GN=Hnrnpa1 PE=1 SV=3 (ROA1_RAT)	ROA1_RAT [7]	Hnrnpa1	34 kDa	0.04	0	0.391723	0	0.391291	0.0233	0.450771	0.0711	0.539243	0.186963	0.289414	0.0495959
Cluster of PREDICTED: dihydropyrimidinase-related protein 1 isoform X1 [Rattus norvegicus] (gi|564383983)	gi|564383983 [2]		?	-0.45	0	0.394306	0	0.387721	-0.277	0.538541	-0.4801	0.432853	0.0650233	0.136442	-0.896334
ATP synthase subunit d, mitochondrial OS=Rattus norvegicus GN=Atp5h PE=1 SV=3	ATP5H_RAT (+1)	Atp5h	19 kDa	-0.13	0	0.393863	0	0.393801	-0.1466	0.439879	-0.1184	0.42147	0.0111354	0.0531526	-0.381496
Prohibitin OS=Rattus norvegicus GN=Phb PE=1 SV=1	PHB_RAT	Phb	30 kDa	-0.24	0	0.392125	0	0.391563	-0.2544	0.520973	-0.2349	0.473686	0.00158448	0.023852	-0.896613
Cluster of Nucleoside diphosphate kinase B OS=Rattus norvegicus GN=Nme2 PE=1 SV=1 (NDKB_RAT)	NDKB_RAT [2]	Nme2	17 kDa	0.15	0	0.390362	0	0.424228	0.1907	0.683028	0.1224	0.421915	0.0444377	0.109385	0.331932
Leucine-rich PPR motif-containing protein, mitochondrial OS=Rattus norvegicus GN=Lrpprc PE=1 SV=1	LPPRC_RAT	Lrpprc	157 kDa	-0.15	0	0.392882	0	0.391074	-0.2279	0.495582	-0.0695	0.461394	0.201241	0.303939	-0.178639
Cluster of Excitatory amino acid transporter 1 OS=Rattus norvegicus GN=Slc1a3 PE=1 SV=2 (EAA1_RAT)	EAA1_RAT [2]	Slc1a3	60 kDa	0.34	0	0.392703	0	0.392078	0.3963	0.514775	0.293	0.505973	0.0217293	0.0776862	0.868726
Cluster of Matrin-3 OS=Rattus norvegicus GN=Matr3 PE=1 SV=2 (MATR3_RAT)	MATR3_RAT [2]	Matr3	94 kDa	-0.15	0	0.393458	0	0.394146	0.1863	0.482814	-0.1673	0.445637	0.962032	0.97152	-0.00433403
Cluster of 14-3-3 zeta isoform [Rattus norvegicus] (gi|1051270)	gi|1051270 [2]		?	-0.07	0	0.39245	0	0.397442	0.0177	0.405347	-0.0924	0.405847	0.567449	0.647933	-0.0303777
Cluster of Heterogeneous nuclear ribonucleoproteins A2/B1 OS=Rattus norvegicus GN=Hnrnpa2b1 PE=1 SV=1 (ROA2_RAT)	ROA2_RAT [2]	Hnrnpa2b1	37 kDa	0.15	0	0.393558	0	0.392597	-0.0175	0.415334	0.167	0.42247	0.502855	0.598341	0.0770393
Cluster of Rab GDP dissociation inhibitor alpha OS=Rattus norvegicus GN=Gdi1 PE=1 SV=1 (GDIA_RAT)	GDIA_RAT [2]	Gdi1	51 kDa	0.35	0	0.38994	0	0.389121	0.3834	0.642179	0.3319	0.683639	0.00514372	0.0346524	1.17684
Succinyl-CoA:3-ketoacid coenzyme A transferase 1, mitochondrial OS=Rattus norvegicus GN=Oxct1 PE=1 SV=1	SCOT1_RAT	Oxct1	56 kDa	0.31	0	0.389564	0	0.475617	1.0376	1.16585	-0.8248	0.390147	0.919468	0.946535	0.0170336
L-lactate dehydrogenase B chain OS=Rattus norvegicus GN=Ldhb PE=1 SV=2	LDHB_RAT (+1)	Ldhb	37 kDa	-0.12	0	0.392403	0	0.394886	-0.422	1.47356	0.1456	1.13784	0.674426	0.734678	-0.0369988
Cluster of Cofilin-1 OS=Rattus norvegicus GN=Cfl1 PE=1 SV=3 (COF1_RAT)	COF1_RAT [2]	Cfl1	19 kDa	0.09	0	0.392729	0	0.391535	0.0387	0.721183	0.1313	0.430833	0.207797	0.311088	0.105091
10 kDa heat shock protein, mitochondrial OS=Rattus norvegicus GN=Hspe1 PE=1 SV=3	CH10_RAT	Hspe1	11 kDa	0.06	0	0.391912	0	0.392832	0.2628	0.409019	-0.1492	0.950173	0.808634	0.853651	0.00949399
ATPase inhibitor, mitochondrial OS=Rattus norvegicus GN=Atpif1 PE=3 SV=2	ATIF1_RAT	Atpif1	12 kDa	-0.12	0	0.391678	0	0.391532	0.0195	0.403011	-0.2544	0.41209	0.481471	0.57867	-0.0656428
Isocitrate dehydrogenase [NAD] subunit alpha, mitochondrial OS=Rattus norvegicus GN=Idh3a PE=1 SV=1	IDH3A_RAT	Idh3a	40 kDa	-0.52	0	0.390605	0	0.390937	-0.4876	0.416187	-0.5669	0.460754	0.00560774	0.0364611	-1.72199
Cluster of gi|157819777	gi|157819777 [4]		?	-0.3	0	0.395778	0	0.392345	-0.3672	0.502105	-0.0466	0.454815	0.325883	0.433382	-0.250841
ATP synthase subunit e, mitochondrial OS=Rattus norvegicus GN=Atp5i PE=1 SV=3	ATP5I_RAT (+1)	Atp5i	8 kDa	-0.04	0	0.391839	0	0.392187	0.0465	0.395946	-0.1209	0.398781	0.700187	0.759525	-0.0110025
Hypoxia up-regulated protein 1 OS=Rattus norvegicus GN=Hyou1 PE=1 SV=1	HYOU1_RAT	Hyou1	111 kDa	-0.03	0	0.392905	0	0.396257	-0.0365	0.476458	-0.0128	0.488436	0.173018	0.274257	-0.0388107
L-lactate dehydrogenase A chain OS=Rattus norvegicus GN=Ldha PE=1 SV=1	LDHA_RAT	Ldha	36 kDa	-0.19	0	0.391217	0	0.390892	-0.2088	0.424992	-0.1674	0.425774	0.0118949	0.0548665	-0.551542
Prohibitin-2 OS=Rattus norvegicus GN=Phb2 PE=1 SV=1	PHB2_RAT	Phb2	33 kDa	0.1	0	0.392163	0	0.392107	0.1894	0.525883	0.0151	0.444737	0.361502	0.467397	0.0760577
Cluster of Peptidyl-prolyl cis-trans isomerase B OS=Rattus norvegicus GN=Ppib PE=1 SV=3 (PPIB_RAT)	PPIB_RAT [2]	Ppib	24 kDa	0.16	0	0.391005	0	0.390857	0.1828	0.398451	0.1306	0.432233	0.0266388	0.0859617	0.392616
Profilin-1 OS=Rattus norvegicus GN=Pfn1 PE=1 SV=2	PROF1_RAT (+2)	Pfn1	15 kDa	0.35	0	0.391566	0	0.393779	0.4011	0.445935	0.2874	0.426115	0.0262045	0.0854568	0.86091
Ubiquitin carboxyl-terminal hydrolase isozyme L1 OS=Rattus norvegicus GN=Uchl1 PE=1 SV=2	UCHL1_RAT (+1)	Uchl1	25 kDa	-0.32	0	0.393281	0	0.393501	-0.3375	0.429713	-0.3073	0.40962	0.00218644	0.0275194	-1.14972
Cluster of Aspartate aminotransferase, mitochondrial OS=Rattus norvegicus GN=Got2 PE=1 SV=2 (AATM_RAT)	AATM_RAT [2]	Got2	47 kDa	-0.5	0	0.392338	0	0.393334	-0.5776	0.43166	-0.4691	0.499362	0.0105751	0.0530466	-1.46829
Cluster of Pyruvate carboxylase, mitochondrial OS=Rattus norvegicus GN=Pc PE=1 SV=2 (PYC_RAT)	PYC_RAT [2]	Pc	130 kDa	-0.04	0	0.393282	0	0.391981	-0.5125	0.519783	0.0277	0.447474	0.464191	0.565871	-0.0227756
Cluster of Vesicle-associated membrane protein 2 OS=Rattus norvegicus GN=Vamp2 PE=1 SV=2 (VAMP2_RAT)	VAMP2_RAT [8]	Vamp2	13 kDa	-0.41	0	0.391717	0	0.391921	-0.1866	0.770613	-0.6385	0.870096	0.209414	0.312491	-0.476904
Glutamate dehydrogenase 1, mitochondrial OS=Rattus norvegicus GN=Glud1 PE=1 SV=2	DHE3_RAT	Glud1	61 kDa	1.31	0	0.419818	0	0.426202	1.3956	0.515136	1.2276	0.420413	0.00407656	0.033465	4.4504
Cluster of Pyruvate kinase PKM OS=Rattus norvegicus GN=Pkm PE=1 SV=3 (KPYM_RAT)	KPYM_RAT [2]	Pkm	58 kDa	-0.1	0	0.391551	0	0.392031	-0.0943	1.0836	-0.108	0.607433	0.00455485	0.0341073	-0.337824
Endoplasmic reticulum resident protein 29 OS=Rattus norvegicus GN=Erp29 PE=1 SV=2	ERP29_RAT	Erp29	29 kDa	0.06	0	0.391025	0	0.392552	0.1017	0.495003	0.0084	0.734073	0.359318	0.467397	0.0456346
Cluster of Guanine nucleotide-binding protein G(I)/G(S)/G(T) subunit beta-1 OS=Rattus norvegicus GN=Gnb1 PE=1 SV=4 (GBB1_RAT)	GBB1_RAT [4]	Gnb1	37 kDa	-0.41	0	0.390558	0	0.38927	-0.4192	0.877063	-0.3997	0.410868	0.00056655	0.0146501	-1.73156
Ras-related protein Rab-2A OS=Rattus norvegicus GN=Rab2a PE=2 SV=1	RAB2A_RAT	Rab2a	24 kDa	-0.2	0	0.390429	0	0.393523	-0.1331	0.417191	-0.2747	0.444396	0.102385	0.192018	-0.330033
Cluster of PREDICTED: mitochondrial inner membrane protein isoform X1 [Rattus norvegicus] (gi|672049933)	gi|672049933 [4]		?	-0.24	0	0.397935	0	0.392326	-0.3671	0.453178	-0.2063	0.582496	0.0704348	0.143584	-0.465801
Cluster of Clathrin coat assembly protein AP180 OS=Rattus norvegicus GN=Snap91 PE=1 SV=1 (AP180_RAT)	AP180_RAT [2]	Snap91	94 kDa	-1.13	0	0.392608	0	0.39062	-1.3711	0.798051	-0.9247	0.549413	0.0357903	0.097556	-2.62988
Malate dehydrogenase, cytoplasmic OS=Rattus norvegicus GN=Mdh1 PE=1 SV=3	MDHC_RAT	Mdh1	36 kDa	-0.03	0	0.394292	0	0.397313	0.0363	0.470174	-0.0849	0.410616	0.727211	0.783857	-0.00730587
Cluster of Tropomyosin alpha-3 chain OS=Rattus norvegicus GN=Tpm3 PE=1 SV=2 (TPM3_RAT)	TPM3_RAT [7]	Tpm3	29 kDa	0.59	0	0.390497	0	0.389803	0.6527	0.709243	0.5182	0.623048	0.0129393	0.0565951	1.69438
Cluster of Vesicle-associated membrane protein-associated protein A OS=Rattus norvegicus GN=Vapa PE=1 SV=3 (VAPA_RAT)	VAPA_RAT [2]	Vapa	28 kDa	-0.05	0	0.391885	0	0.398035	-0.0568	0.422226	-0.0538	0.418672	0.000734942	0.0146501	-0.211165
Triosephosphate isomerase OS=Rattus norvegicus GN=Tpi1 PE=1 SV=2	TPIS_RAT	Tpi1	27 kDa	-0.01	0	0.392525	0	0.389068	0.0323	0.577772	-0.0662	0.41915	0.763542	0.812751	-0.0020733
Cluster of Calmodulin-like protein 3 OS=Rattus norvegicus GN=Calml3 PE=2 SV=1 (CALL3_RAT)	CALL3_RAT [3]	Calml3	17 kDa	-0.02	0	0.393893	0	0.391802	-0.3413	0.391802	0.0559	0.396797	0.547035	0.629397	-0.00925985
Cluster of Glutathione S-transferase Mu 1 OS=Rattus norvegicus GN=Gstm1 PE=1 SV=2 (GSTM1_RAT)	GSTM1_RAT [7]	Gstm1	26 kDa	1.03	0	0.389487	0	0.395017	0.9356	0.545654	1.0598	0.479346	0.00385184	0.033465	3.49917
Pyruvate dehydrogenase E1 component subunit beta, mitochondrial OS=Rattus norvegicus GN=Pdhb PE=1 SV=2	ODPB_RAT	Pdhb	39 kDa	-0.41	0	0.391008	0	0.391933	-0.3512	0.42785	-0.4542	0.478543	0.0159644	0.0633627	-1.13114
Ras-related protein Rab-7a OS=Rattus norvegicus GN=Rab7a PE=1 SV=2	RAB7A_RAT (+1)	Rab7a	24 kDa	-0.13	0	0.390865	0	0.39521	-0.1247	0.495646	-0.1456	0.407767	0.00592553	0.0367763	-0.429377
Cluster of Neural cell adhesion molecule L1 OS=Rattus norvegicus GN=L1cam PE=1 SV=3 (L1CAM_RAT)	L1CAM_RAT [2]	L1cam	141 kDa	-0.53	0	0.399576	0	0.388779	-0.752	0.39396	-0.4041	0.682274	0.079859	0.159165	-0.974042
Cluster of Ras-related C3 botulinum toxin substrate 1 OS=Rattus norvegicus GN=Rac1 PE=1 SV=1 (RAC1_RAT)	RAC1_RAT [6]	Rac1	21 kDa	-0.05	0	0.391354	0	0.391973	-0.0092	0.473562	-0.0803	0.434018	0.335131	0.442419	-0.0407749
Cluster of solute carrier family 25 (mitochondrial carrier; adenine nucleotide translocator), member 3, isoform CRA_a [Rattus norvegicus] (gi|149067210)	gi|149067210 [4]		?	-0.23	0	0.391808	0	0.390159	-0.123	0.438204	-0.2468	0.440135	0.0961782	0.183743	-0.389669
Lysosome membrane protein 2 OS=Rattus norvegicus GN=Scarb2 PE=1 SV=2	SCRB2_RAT	Scarb2	54 kDa	0.18	0	0.39069	0	0.392157	0.2448	0.459978	0.097	0.502926	0.146877	0.244381	0.253625
14-3-3 protein eta OS=Rattus norvegicus GN=Ywhah PE=1 SV=2	1433F_RAT	Ywhah	28 kDa	-0.04	0	0.391456	0	0.393193	0.0402	0.570702	-0.2015	0.444359	0.573238	0.650771	-0.0171839
Synapsin-1 OS=Rattus norvegicus GN=Syn1 PE=1 SV=3	SYN1_RAT	Syn1	74 kDa	-0.92	0	0.390198	0	0.393467	-1.1181	0.884097	-0.727	0.782916	0.0421121	0.105178	-2.07194
Cluster of Unconventional myosin-Va OS=Rattus norvegicus GN=Myo5a PE=1 SV=1 (MYO5A_RAT)	MYO5A_RAT [3]	Myo5a	212 kDa	-0.31	0	0.409796	0	0.4007	-0.4703	0.947426	-0.1576	1.33236	0.18242	0.284753	-0.389401
Cytochrome c oxidase subunit 5A, mitochondrial OS=Rattus norvegicus GN=Cox5a PE=1 SV=1	COX5A_RAT (+1)	Cox5a	16 kDa	0.04	0	0.390062	0	0.389957	0.1724	0.467956	-0.0897	0.396686	0.782242	0.829209	0.00749134
Acetyl-CoA acetyltransferase, mitochondrial OS=Rattus norvegicus GN=Acat1 PE=1 SV=1	THIL_RAT	Acat1	45 kDa	-0.32	0	0.393195	0	0.39055	-0.36	0.468919	-0.2636	0.481977	0.0230731	0.0795305	-0.810117
Cluster of Fructose-bisphosphate aldolase A OS=Rattus norvegicus GN=Aldoa PE=1 SV=2 (ALDOA_RAT)	ALDOA_RAT [2]	Aldoa	39 kDa	-0.15	0	0.395153	0	0.394961	-0.25	0.397172	-0.1448	0.49179	0.0642372	0.135851	-0.299429
Superoxide dismutase [Cu-Zn] OS=Rattus norvegicus GN=Sod1 PE=1 SV=2	SODC_RAT	Sod1	16 kDa	0.37	0	0.391301	0	0.392042	0.5072	0.522943	0.2269	0.421317	0.12009	0.21202	0.573897
Annexin A6 OS=Rattus norvegicus GN=Anxa6 PE=1 SV=2	ANXA6_RAT	Anxa6	76 kDa	0.41	0	0.390879	0	0.39252	0.1253	0.428126	0.655	0.475562	0.278622	0.386598	0.389652
Cluster of Calcium/calmodulin-dependent protein kinase type II subunit alpha OS=Rattus norvegicus GN=Camk2a PE=1 SV=1 (KCC2A_RAT)	KCC2A_RAT [3]	Camk2a	54 kDa	-0.45	0	0.390588	0	0.389255	-0.4727	0.4173	-0.4416	0.601737	0.00115502	0.0190765	-1.78168
Fatty acid-binding protein, brain OS=Rattus norvegicus GN=Fabp7 PE=1 SV=2	FABP7_RAT	Fabp7	15 kDa	0.87	0	0.391803	0	0.393313	1.1042	0.420093	0.6388	0.546005	0.0644762	0.135851	1.73669
Succinate dehydrogenase [ubiquinone] flavoprotein subunit, mitochondrial OS=Rattus norvegicus GN=Sdha PE=1 SV=1	SDHA_RAT (+1)	Sdha	72 kDa	-0.46	0	0.391894	0	0.393992	-0.5357	0.481839	-0.3496	0.422779	0.04146	0.104337	-1.03966
Protein disulfide-isomerase OS=Rattus norvegicus GN=P4hb PE=1 SV=2	PDIA1_RAT	P4hb	57 kDa	0.16	0	0.392656	0	0.388126	0.209	0.388126	0.1569	0.430841	0.0196781	0.0735414	0.417585
Neuromodulin OS=Rattus norvegicus GN=Gap43 PE=1 SV=1	NEUM_RAT	Gap43	24 kDa	-0.28	0	0.393745	0	0.392195	-0.1269	0.402949	-0.3983	0.417879	0.192622	0.294395	-0.342393
Peroxiredoxin-1 OS=Rattus norvegicus GN=Prdx1 PE=1 SV=1	PRDX1_RAT	Prdx1	22 kDa	0.85	0	0.390838	0	0.392968	0.7566	0.787774	0.9287	0.559395	0.0102678	0.0521609	2.51041
Cytochrome c oxidase subunit 4 isoform 1, mitochondrial OS=Rattus norvegicus GN=Cox4i1 PE=1 SV=1	COX41_RAT	Cox4i1	20 kDa	-0.94	0	0.393326	0	0.393495	0.1065	0.416219	-1.6571	4.61677	0.472015	0.572681	-0.523981
Cluster of Reticulon-4 OS=Rattus norvegicus GN=Rtn4 PE=1 SV=1 (RTN4_RAT)	RTN4_RAT [2]	Rtn4	126 kDa	-0.32	0	0.390235	0	0.402453	-0.3515	0.659196	-0.3009	0.51104	0.00596178	0.0367763	-1.05693
Cluster of Ezrin OS=Rattus norvegicus GN=Ezr PE=1 SV=3 (EZRI_RAT)	EZRI_RAT [6]	Ezr	69 kDa	0.55	0	0.392454	0	0.394848	0.2747	0.394848	0.5707	1.2272	0.103844	0.193339	0.903821
Cluster of 2-oxoglutarate dehydrogenase, mitochondrial OS=Rattus norvegicus GN=Ogdh PE=1 SV=1 (ODO1_RAT)	ODO1_RAT [2]	Ogdh	116 kDa	-0.3	0	0.393356	0	0.404137	-0.3773	0.502298	-0.2273	0.435865	0.056396	0.127201	-0.618595
Nestin OS=Rattus norvegicus GN=Nes PE=1 SV=2	NEST_RAT	Nes	209 kDa	0.33	0	0.390175	0	0.388776	0.4156	1.17236	0.2555	1.03213	0.0524732	0.120477	0.698379
Cytochrome b-c1 complex subunit 2, mitochondrial OS=Rattus norvegicus GN=Uqcrc2 PE=1 SV=2	QCR2_RAT	Uqcrc2	48 kDa	-0.12	0	0.39026	0	0.392156	-0.0749	0.481829	-0.1625	0.436793	0.113452	0.203816	-0.190865
ATP synthase subunit f, mitochondrial OS=Rattus norvegicus GN=Atp5j2 PE=1 SV=1	ATPK_RAT (+2)	Atp5j2	10 kDa	-0.1	0	0.394118	0	0.393174	-0.0191	0.400059	-0.1765	0.404314	0.339915	0.446248	-0.0806881
Neuronal membrane glycoprotein M6-a OS=Rattus norvegicus GN=Gpm6a PE=1 SV=1	GPM6A_RAT	Gpm6a	31 kDa	0.2	0	0.422858	0	0.390914	-0.2519	0.515283	0.565	2.13372	0.738418	0.792599	0.0464874
Phosphatidylethanolamine-binding protein 1 OS=Rattus norvegicus GN=Pebp1 PE=1 SV=3	PEBP1_RAT	Pebp1	21 kDa	0.09	0	0.392016	0	0.395015	0.1649	0.466096	-0.0097	0.455733	0.467848	0.568974	0.0507528
Voltage-dependent anion-selective channel protein 3 OS=Rattus norvegicus GN=Vdac3 PE=1 SV=2	VDAC3_RAT	Vdac3	31 kDa	-0.31	0	0.389983	0	0.389409	-0.2544	0.443345	-0.3723	0.675262	0.0336177	0.0961579	-0.725947
Heterogeneous nuclear ribonucleoprotein A3 OS=Rattus norvegicus GN=Hnrnpa3 PE=1 SV=1	ROA3_RAT	Hnrnpa3	40 kDa	0.07	0	0.391266	0	0.393824	0.2634	0.443439	-0.1069	0.928437	0.713668	0.770882	0.0182154
Cluster of Acyl-CoA-binding protein OS=Rattus norvegicus GN=Dbi PE=1 SV=3 (ACBP_RAT)	ACBP_RAT [3]	Dbi	10 kDa	1.08	0	0.391338	0	0.390995	1.411	0.465975	0.9438	0.436982	0.0371823	0.10017	2.48496
Cullin-associated NEDD8-dissociated protein 1 OS=Rattus norvegicus GN=Cand1 PE=1 SV=1	CAND1_RAT	Cand1	136 kDa	0	0	0.393626	0	0.39062	-0.1459	0.563075	0.1871	0.411694	0.912847	0.944197	0
Cluster of Citrate synthase, mitochondrial OS=Rattus norvegicus GN=Cs PE=1 SV=1 (CISY_RAT)	CISY_RAT [2]	Cs	52 kDa	-0.38	0	0.391342	0	0.388569	-0.3293	0.402859	-0.387	0.479516	0.00642628	0.0387089	-1.23564
Nucleophosmin OS=Rattus norvegicus GN=Npm1 PE=1 SV=1	NPM_RAT	Npm1	33 kDa	0.31	0	0.391503	0	0.392442	0.4672	0.625607	0.0989	0.522102	0.264097	0.370459	0.307834
Microtubule-associated protein tau OS=Rattus norvegicus GN=Mapt PE=1 SV=3	TAU_RAT	Mapt	79 kDa	-0.36	0	0.389263	0	0.389455	-0.3847	0.488222	-0.3391	0.511387	0.00394563	0.033465	-1.22301
Adenylate kinase isoenzyme 1 OS=Rattus norvegicus GN=Ak1 PE=1 SV=3	KAD1_RAT	Ak1	22 kDa	-0.46	0	0.389488	0	0.390765	-0.4364	0.414523	-0.4834	0.409112	0.00260083	0.0289318	-1.6297
Sodium/potassium-transporting ATPase subunit beta-1 OS=Rattus norvegicus GN=Atp1b1 PE=1 SV=1	AT1B1_RAT	Atp1b1	35 kDa	-0.78	0	0.391307	0	0.392691	-0.6395	0.467307	-0.9074	0.925477	0.0287078	0.0880895	-1.89493
Importin subunit beta-1 OS=Rattus norvegicus GN=Kpnb1 PE=1 SV=1	IMB1_RAT	Kpnb1	97 kDa	0.04	0	0.400027	0	0.391906	0.1319	0.443054	-0.0909	0.555071	0.870965	0.908216	0.00385092
Cluster of Phosphoglycerate mutase 1 OS=Rattus norvegicus GN=Pgam1 PE=1 SV=4 (PGAM1_RAT)	PGAM1_RAT [3]	Pgam1	29 kDa	0.16	0	0.390484	0	0.392443	0.182	0.448206	0.1206	0.453075	0.0387918	0.101992	0.365257
Thiosulfate sulfurtransferase OS=Rattus norvegicus GN=Tst PE=1 SV=3	THTR_RAT (+2)	Tst	33 kDa	0.25	0	0.389714	0	0.391894	0.2861	0.440708	0.2224	0.427362	0.0153327	0.0621054	0.694731
Voltage-dependent anion-selective channel protein 2 OS=Rattus norvegicus GN=Vdac2 PE=1 SV=2	VDAC2_RAT	Vdac2	32 kDa	-0.33	0	0.393361	0	0.392585	-0.3519	0.710184	-0.3054	0.417491	0.00496745	0.0343694	-1.11229
Cluster of Apolipoprotein E OS=Rattus norvegicus GN=Apoe PE=1 SV=2 (APOE_RAT)	APOE_RAT [2]	Apoe	36 kDa	0.2	0	0.38971	0	0.388392	0.4493	0.398284	0.1465	0.408382	0.18798	0.289897	0.247646
Protein disulfide-isomerase A6 OS=Rattus norvegicus GN=Pdia6 PE=1 SV=2	PDIA6_RAT	Pdia6	48 kDa	-0.03	0	0.38988	0	0.390246	-0.1229	0.855667	0.0224	0.447517	0.560647	0.642394	-0.0132766
Cluster of 40S ribosomal protein S17 OS=Rattus norvegicus GN=Rps17 PE=1 SV=3 (RS17_RAT)	RS17_RAT [2]	Rps17	16 kDa	0.33	0	0.396153	0	0.391793	0.3967	0.4053	0.2848	0.518775	0.025917	0.0854568	0.811716
60S ribosomal protein L15 OS=Rattus norvegicus GN=Rpl15 PE=1 SV=2	RL15_RAT	Rpl15	24 kDa	0.45	0	0.391377	0	0.394255	0.7069	0.406898	0.206	0.393435	0.209955	0.312491	0.523431
Staphylococcal nuclease domain-containing protein 1 OS=Rattus norvegicus GN=Snd1 PE=1 SV=1	SND1_RAT	Snd1	102 kDa	0.37	0	0.395623	0	0.390151	0.2651	0.430229	0.4492	0.669829	0.0604651	0.129179	0.757227
Superoxide dismutase [Mn], mitochondrial OS=Rattus norvegicus GN=Sod2 PE=1 SV=2	SODM_RAT	Sod2	25 kDa	-0.05	0	0.390331	0	0.395327	0.0252	0.415798	-0.1597	0.454313	0.542597	0.625698	-0.0234444
T-complex protein 1 subunit alpha OS=Rattus norvegicus GN=Tcp1 PE=1 SV=1	TCPA_RAT	Tcp1	60 kDa	-0.6	0	0.392797	0	0.391628	-0.4404	1.7214	-0.9174	2.22986	0.104436	0.193736	-0.984755
Heat shock 70 kDa protein 4 OS=Rattus norvegicus GN=Hspa4 PE=1 SV=1	HSP74_RAT	Hspa4	94 kDa	0.06	0	0.390004	0	0.388255	-0.0492	0.390943	0.071	0.414561	0.872798	0.908277	0.00577233
Transketolase OS=Rattus norvegicus GN=Tkt PE=1 SV=1	TKT_RAT	Tkt	68 kDa	0.32	0	0.388118	0	0.410355	0.2538	0.503607	0.3952	0.986444	0.0443359	0.109385	0.708122
Glutathione S-transferase P OS=Rattus norvegicus GN=Gstp1 PE=1 SV=2	GSTP1_RAT	Gstp1	23 kDa	0.22	0	0.392944	0	0.395059	0.2522	0.405391	0.1882	0.433187	0.0204723	0.0754089	0.568663
Ras-related protein Rab-11B OS=Rattus norvegicus GN=Rab11b PE=1 SV=4	RB11B_RAT	Rab11b	24 kDa	0.2	0	0.392122	0	0.391728	0.2944	0.431189	0.1229	0.400255	0.135422	0.232671	0.291626
Fructose-bisphosphate aldolase C OS=Rattus norvegicus GN=Aldoc PE=1 SV=3	ALDOC_RAT	Aldoc	39 kDa	0.7	0	0.391861	0	0.392622	1.032	1.11197	0.435	0.47515	0.133288	0.230391	1.02758
Peroxiredoxin-5, mitochondrial OS=Rattus norvegicus GN=Prdx5 PE=1 SV=1	PRDX5_RAT	Prdx5	22 kDa	0.75	0	0.395104	0	0.398113	-0.0708	0.435645	1.4136	4.65968	0.461153	0.565871	0.427042
Receptor expression-enhancing protein 5 OS=Rattus norvegicus GN=Reep5 PE=1 SV=1	REEP5_RAT	Reep5	21 kDa	0.15	0	0.390495	0	0.390761	0.2167	0.412963	0.0922	0.402029	0.131219	0.228517	0.221422
Cytochrome b-c1 complex subunit 1, mitochondrial OS=Rattus norvegicus GN=Uqcrc1 PE=1 SV=1	QCR1_RAT	Uqcrc1	53 kDa	-0.16	0	0.390625	0	0.389762	-0.2141	0.404877	-0.0901	0.426949	0.133645	0.230391	-0.234876
Cluster of ATP-citrate synthase OS=Rattus norvegicus GN=Acly PE=1 SV=1 (ACLY_RAT)	ACLY_RAT [4]	Acly	121 kDa	-0.25	0	0.393356	0	0.389356	-0.2269	0.389356	-0.2481	0.615201	0.00198605	0.0274826	-0.898551
Cluster of Catenin beta-1 OS=Rattus norvegicus GN=Ctnnb1 PE=1 SV=1 (CTNB1_RAT)	CTNB1_RAT [2]	Ctnnb1	85 kDa	0.03	0	0.392126	0	0.389192	0.1084	0.529361	-0.0022	0.474857	0.438269	0.543327	0.0183013
Cluster of Alpha-internexin OS=Rattus norvegicus GN=Ina PE=1 SV=2 (AINX_RAT)	AINX_RAT [2]	Ina	56 kDa	-0.95	0	0.391221	0	0.389825	-1.1308	0.438484	-0.8821	0.504907	0.0149245	0.0616237	-2.64737
Cluster of Nucleolin OS=Rattus norvegicus GN=Ncl PE=1 SV=3 (NUCL_RAT)	NUCL_RAT [2]	Ncl	77 kDa	0.45	0	0.396226	0	0.389667	1.232	0.453878	0.3296	0.901177	0.225682	0.33014	0.498707
T-complex protein 1 subunit gamma OS=Rattus norvegicus GN=Cct3 PE=1 SV=1	TCPG_RAT	Cct3	61 kDa	0.23	0	0.390193	0	0.393522	0.2256	0.562853	0.2287	0.560998	4.65594e-05	0.00397307	1.27149
Cluster of ATP-dependent 6-phosphofructokinase, liver type OS=Rattus norvegicus GN=Pfkl PE=1 SV=3 (PFKAL_RAT)	PFKAL_RAT [3]	Pfkl	85 kDa	-0.19	0	0.391071	0	0.403373	-0.0846	0.410935	-0.2125	0.560579	0.145845	0.244029	-0.267989
Cluster of Serine/threonine-protein phosphatase PP1-gamma catalytic subunit OS=Rattus norvegicus GN=Ppp1cc PE=1 SV=1 (PP1G_RAT)	PP1G_RAT [3]	Ppp1cc	37 kDa	0.15	0	0.387652	0	0.40216	0.1844	0.422889	0.0723	0.387652	0.149177	0.246383	0.21013
14-3-3 protein beta/alpha OS=Rattus norvegicus GN=Ywhab PE=1 SV=3	1433B_RAT	Ywhab	28 kDa	-0.08	0	0.39038	0	0.392945	-0.0371	0.40077	-0.1588	0.408659	0.24875	0.356656	-0.0824788
Adenylyl cyclase-associated protein 1 OS=Rattus norvegicus GN=Cap1 PE=1 SV=3	CAP1_RAT	Cap1	52 kDa	0.78	0	0.389521	0	0.388086	0.6468	1.23895	0.9871	0.395343	0.0407455	0.10379	1.767
Ketimine reductase mu-crystallin OS=Rattus norvegicus GN=Crym PE=1 SV=1	CRYM_RAT	Crym	34 kDa	-0.35	0	0.392494	0	0.390605	-0.4036	0.429391	-0.332	0.470656	0.00934165	0.0487665	-1.05725
Transforming protein RhoA OS=Rattus norvegicus GN=Rhoa PE=1 SV=1	RHOA_RAT	Rhoa	22 kDa	-0.03	0	0.39027	0	0.391269	-0.0066	0.47864	-0.0621	0.466016	0.341375	0.447017	-0.0241547
Macrophage migration inhibitory factor OS=Rattus norvegicus GN=Mif PE=1 SV=4	MIF_RAT	Mif	12 kDa	0	0	0.391522	0	0.390304	0.041	0.410681	-0.0488	0.401907	0.938696	0.955425	0
Peroxiredoxin-2 OS=Rattus norvegicus GN=Prdx2 PE=1 SV=3	PRDX2_RAT (+2)	Prdx2	22 kDa	0.19	0	0.394118	0	0.397774	0.1954	0.515619	0.1771	0.405083	0.00240481	0.0289318	0.673135
Syntaxin-1B OS=Rattus norvegicus GN=Stx1b PE=1 SV=1	STX1B_RAT (+2)	Stx1b	33 kDa	-0.55	0	0.392079	0	0.391037	-0.4687	0.411275	-0.6508	0.397593	0.025453	0.0850828	-1.35527
Glycerol-3-phosphate dehydrogenase, mitochondrial OS=Rattus norvegicus GN=Gpd2 PE=1 SV=1	GPDM_RAT	Gpd2	81 kDa	-0.13	0	0.390317	0	0.388671	-0.0214	0.526858	-0.2607	0.394767	0.359705	0.467397	-0.098875
Rho GDP-dissociation inhibitor 1 OS=Rattus norvegicus GN=Arhgdia PE=1 SV=1	GDIR1_RAT	Arhgdia	23 kDa	0.09	0	0.390474	0	0.391743	0.1029	0.470249	0.0707	1.19899	0.0327248	0.0946616	0.21217
Cluster of ADP-ribosylation factor-like protein 8B OS=Rattus norvegicus GN=Arl8b PE=2 SV=1 (ARL8B_RAT)	ARL8B_RAT [2]	Arl8b	22 kDa	-0.16	0	0.39554	0	0.391557	0.002	0.425196	-0.3601	0.415283	0.426925	0.537066	-0.0994616
Cluster of Sarcoplasmic/endoplasmic reticulum calcium ATPase 2 OS=Rattus norvegicus GN=Atp2a2 PE=1 SV=1 (AT2A2_RAT)	AT2A2_RAT [2]	Atp2a2	115 kDa	-0.16	0	0.395089	0	0.391893	-0.2119	0.396281	-0.1252	0.406908	0.0602339	0.129179	-0.32745
Visinin-like protein 1 OS=Rattus norvegicus GN=Vsnl1 PE=1 SV=2	VISL1_RAT	Vsnl1	22 kDa	-0.56	0	0.389757	0	0.389577	-0.4493	0.580095	-0.6443	0.445797	0.0303543	0.0908109	-1.34343
Peroxiredoxin-6 OS=Rattus norvegicus GN=Prdx6 PE=1 SV=3	PRDX6_RAT	Prdx6	25 kDa	0.81	0	0.391786	0	0.393642	0.9468	0.561272	0.6439	0.463696	0.0343995	0.096369	1.89505
40S ribosomal protein S19 OS=Rattus norvegicus GN=Rps19 PE=2 SV=3	RS19_RAT	Rps19	16 kDa	0.9	0	0.390451	0	0.391036	1.0329	0.469415	0.7569	0.483709	0.0229639	0.0795305	2.27845
40S ribosomal protein S7 OS=Rattus norvegicus GN=Rps7 PE=1 SV=1	RS7_RAT	Rps7	22 kDa	0.6	0	0.389799	0	0.390921	0.6424	0.433172	0.5538	0.46703	0.00544131	0.0361812	1.99153
Cluster of Synaptotagmin-1 OS=Rattus norvegicus GN=Syt1 PE=1 SV=3 (SYT1_RAT)	SYT1_RAT [2]	Syt1	47 kDa	-0.24	0	0.391606	0	0.392542	0.0618	1.62703	-0.542	0.44042	0.509832	0.604209	-0.12092
Cathepsin B OS=Rattus norvegicus GN=Ctsb PE=1 SV=2	CATB_RAT (+6)	Ctsb	37 kDa	0.82	0	0.39254	0	0.39096	0.8611	0.445894	0.7404	0.515647	0.00563222	0.0364611	2.71544
Cluster of Ras-related protein Rab-6A OS=Rattus norvegicus GN=Rab6a PE=1 SV=2 (RAB6A_RAT)	RAB6A_RAT [2]	Rab6a	24 kDa	-0.02	0	0.389566	0	0.389594	-0.0199	0.44014	-0.0147	0.551736	0.0218493	0.0776862	-0.0511015
Cluster of V-type proton ATPase subunit E 1 OS=Rattus norvegicus GN=Atp6v1e1 PE=1 SV=1 (VATE1_RAT)	VATE1_RAT [3]	Atp6v1e1	26 kDa	-0.5	0	0.391601	0	0.39156	-0.4344	0.39156	-0.5082	0.562895	0.00607417	0.0370235	-1.6481
ES1 protein homolog, mitochondrial OS=Rattus norvegicus PE=1 SV=2	ES1_RAT		28 kDa	-0.11	0	0.392997	0	0.3905	-0.1108	0.434841	-0.1165	0.509653	0.000628263	0.0146501	-0.464564
Cluster of Microtubule-associated protein RP/EB family member 1 OS=Rattus norvegicus GN=Mapre1 PE=1 SV=3 (MARE1_RAT)	MARE1_RAT [2]	Mapre1	30 kDa	-0.01	0	0.390838	0	0.391155	0.089	0.408645	-0.1217	0.996801	0.890914	0.92525	-0.000776918
Heterogeneous nuclear ribonucleoprotein K OS=Rattus norvegicus GN=Hnrnpk PE=1 SV=1	HNRPK_RAT	Hnrnpk	51 kDa	0.72	0	0.392234	0	0.389493	1.2712	0.811974	0.5065	0.500075	0.145667	0.244029	1.01554
Cluster of gi|347800697	gi|347800697 [4]		?	0.06	0	0.390226	0	0.390334	0.0882	0.407837	0.01	0.419732	0.336027	0.442419	0.0489299
14-3-3 protein theta OS=Rattus norvegicus GN=Ywhaq PE=1 SV=1	1433T_RAT	Ywhaq	28 kDa	0.38	0	0.395623	0	0.395673	0.0282	0.414418	1.1063	2.33746	0.403034	0.513317	0.253407
Ornithine aminotransferase, mitochondrial OS=Rattus norvegicus GN=Oat PE=1 SV=1	OAT_RAT	Oat	48 kDa	-0.11	0	0.391758	0	0.389264	-0.2384	0.405095	-0.0548	0.405705	0.251359	0.358484	-0.112846
Cluster of Band 4.1-like protein 1 OS=Rattus norvegicus GN=Epb41l1 PE=1 SV=1 (E41L1_RAT)	E41L1_RAT [2]	Epb41l1	98 kDa	-0.47	0	0.396252	0	0.39094	-0.4876	0.585047	-0.426	0.492554	0.00451544	0.0341073	-1.58777
NADH dehydrogenase [ubiquinone] flavoprotein 2, mitochondrial OS=Rattus norvegicus GN=Ndufv2 PE=1 SV=2	NDUV2_RAT	Ndufv2	27 kDa	-0.18	0	0.391926	0	0.393774	-0.1225	0.476839	-0.228	0.492836	0.0798932	0.159165	-0.330807
F-actin-capping protein subunit beta OS=Rattus norvegicus GN=Capzb PE=1 SV=1	CAPZB_RAT	Capzb	31 kDa	-0.01	0	0.390876	0	0.390441	-0.0059	0.465106	-0.0082	0.588064	0.0255913	0.0850828	-0.0246413
Cytochrome c oxidase subunit 5B, mitochondrial OS=Rattus norvegicus GN=Cox5b PE=1 SV=2	COX5B_RAT (+3)	Cox5b	14 kDa	-0.11	0	0.38824	0	0.390361	-0.0734	0.400492	-0.1467	0.394198	0.0953166	0.183743	-0.186364
Eukaryotic translation initiation factor 3 subunit A OS=Rattus norvegicus GN=Eif3a PE=2 SV=2	EIF3A_RAT	Eif3a	163 kDa	0.59	0	0.392221	0	0.410757	0.5473	0.572183	0.6655	0.455564	0.00936531	0.0487665	1.78222
Phosphoglycerate kinase 1 OS=Rattus norvegicus GN=Pgk1 PE=1 SV=2	PGK1_RAT	Pgk1	45 kDa	0.03	0	0.391898	0	0.393981	-0.0096	0.397895	0.0494	0.473112	0.569473	0.647933	0.013019
Cluster of Plexin-A3 OS=Rattus norvegicus GN=Plxna3 PE=3 SV=1 (PLXA3_RAT)	PLXA3_RAT [6]	Plxna3	208 kDa	-0.61	0	0.39276	0	0.393226	-0.8503	0.426606	-0.4455	0.48189	0.0852901	0.168604	-1.08592
Cluster of Hemoglobin subunit beta-1 OS=Rattus norvegicus GN=Hbb PE=1 SV=3 (HBB1_RAT)	HBB1_RAT [3]	Hbb	16 kDa	0.1	0	0.43168	0	0.461484	-0.0228	0.576277	0.2292	0.891423	0.49883	0.598128	0.051395
Succinate dehydrogenase [ubiquinone] iron-sulfur subunit, mitochondrial OS=Rattus norvegicus GN=Sdhb PE=2 SV=2	SDHB_RAT	Sdhb	32 kDa	-0.24	0	0.392721	0	0.391439	-0.2124	0.418404	-0.2852	0.479929	0.0207408	0.0758519	-0.618953
Cluster of transferrin receptor protein 1 [Rattus norvegicus] (gi|281306746)	gi|281306746 [2]		?	-0.25	0	0.397129	0	0.38948	-0.2992	0.454022	-0.213	0.471097	0.0271736	0.0864154	-0.612147
LETM1 and EF-hand domain-containing protein 1, mitochondrial OS=Rattus norvegicus GN=Letm1 PE=1 SV=1	LETM1_RAT	Letm1	83 kDa	-0.18	0	0.391547	0	0.389834	-0.1835	0.471129	-0.1779	0.395852	0.000240018	0.0121195	-0.794329
Cluster of Heterogeneous nuclear ribonucleoprotein M OS=Rattus norvegicus GN=Hnrnpm PE=1 SV=4 (HNRPM_RAT)	HNRPM_RAT [5]	Hnrnpm	74 kDa	0.15	0	0.396155	0	0.392248	-0.2407	0.392248	0.1993	0.426449	0.933614	0.954113	0.00704598
D-beta-hydroxybutyrate dehydrogenase, mitochondrial OS=Rattus norvegicus GN=Bdh1 PE=1 SV=2	BDH_RAT	Bdh1	38 kDa	-0.55	0	0.390172	0	0.388749	-0.5907	0.542926	-0.5138	0.435995	0.00481257	0.0341073	-1.85803
3-hydroxyacyl-CoA dehydrogenase type-2 OS=Rattus norvegicus GN=Hsd17b10 PE=1 SV=3	HCD2_RAT	Hsd17b10	27 kDa	-0.08	0	0.392709	0	0.388468	-0.1191	0.48919	-0.0147	0.457346	0.328487	0.435713	-0.0664617
Cluster of 40S ribosomal protein S18 OS=Rattus norvegicus GN=Rps18 PE=1 SV=3 (RS18_RAT)	RS18_RAT [2]	Rps18	18 kDa	0.15	0	0.396595	0	0.392206	0.1079	1.32991	0.1797	1.27972	0.0570453	0.127633	0.30879
Ferritin heavy chain OS=Rattus norvegicus GN=Fth1 PE=1 SV=3	FRIH_RAT	Fth1	21 kDa	0.34	0	0.4018	0	0.392103	0.4413	0.444031	0.1993	0.4061	0.117983	0.209747	0.531031
Cluster of tropomyosin-related protein, neuronal - rat (gi|281046)	gi|281046 [3]		?	-0.41	0	0.393608	0	0.392249	-0.4815	0.451197	-0.339	0.432725	0.0288633	0.0880895	-0.996055
Cluster of High mobility group protein B1 OS=Rattus norvegicus GN=Hmgb1 PE=1 SV=2 (HMGB1_RAT)	HMGB1_RAT [5]	Hmgb1	25 kDa	1.55	0	0.414606	0	0.400777	1.7675	0.504368	1.2623	0.459424	0.0266951	0.0859617	3.80347
Translationally-controlled tumor protein OS=Rattus norvegicus GN=Tpt1 PE=1 SV=1	TCTP_RAT	Tpt1	19 kDa	0.28	0	0.39408	0	0.390977	0.3005	0.400565	0.2514	0.402764	0.0078221	0.0429346	0.881462
Heterogeneous nuclear ribonucleoprotein D0 OS=Rattus norvegicus GN=Hnrnpd PE=1 SV=2	HNRPD_RAT	Hnrnpd	38 kDa	-0.38	0	0.393467	0	0.398553	0.3244	0.45716	-0.9344	1.85068	0.675846	0.734678	-0.117163
Cluster of PREDICTED: LOW QUALITY PROTEIN: ankyrin-2 isoform X2 [Rattus norvegicus] (gi|672044124)	gi|672044124 [4]		?	-0.63	0	0.40376	0	0.403045	-0.7727	0.619146	-0.2466	0.439727	0.192286	0.294395	-0.770385
Cluster of Cadherin-2 OS=Rattus norvegicus GN=Cdh2 PE=1 SV=1 (CADH2_RAT)	CADH2_RAT [2]	Cdh2	100 kDa	0.21	0	0.392219	0	0.390454	0.0815	0.390454	0.2364	0.576252	0.17657	0.277906	0.268899
Serine/threonine-protein kinase DCLK1 OS=Rattus norvegicus GN=Dclk1 PE=1 SV=1	DCLK1_RAT	Dclk1	48 kDa	-0.3	0	0.390415	0	0.390176	0.0093	1.1185	-0.5081	0.469035	0.436737	0.543281	-0.183039
Heterogeneous nuclear ribonucleoprotein L OS=Rattus norvegicus GN=Hnrnpl PE=1 SV=2	HNRPL_RAT	Hnrnpl	68 kDa	-0.08	0	0.392344	0	0.394739	-0.0463	0.426413	-0.1287	0.423232	0.167652	0.269085	-0.105018
Nck-associated protein 1 OS=Rattus norvegicus GN=Nckap1 PE=2 SV=1	NCKP1_RAT	Nckap1	129 kDa	-0.22	0	0.407653	0	0.400945	-0.1368	0.560248	-0.2909	0.506458	0.108999	0.200746	-0.353257
NADH dehydrogenase [ubiquinone] 1 alpha subcomplex subunit 9, mitochondrial OS=Rattus norvegicus GN=Ndufa9 PE=1 SV=2	NDUA9_RAT	Ndufa9	43 kDa	-0.22	0	0.389759	0	0.392904	-0.2583	0.448578	-0.1799	0.403592	0.0305508	0.0908109	-0.527775
T-complex protein 1 subunit epsilon OS=Rattus norvegicus GN=Cct5 PE=1 SV=1	TCPE_RAT	Cct5	60 kDa	1.02	0	0.393145	0	0.38993	1.0588	2.32604	0.9659	2.07412	0.00209866	0.0275194	3.66472
Cluster of GTP-binding nuclear protein Ran OS=Rattus norvegicus GN=Ran PE=1 SV=3 (RAN_RAT)	RAN_RAT [2]	Ran	24 kDa	0.35	0	0.392243	0	0.405302	0.3916	0.452751	0.3124	0.398376	0.0124209	0.0558784	1.0096
Vesicle-trafficking protein SEC22b OS=Rattus norvegicus GN=Sec22b PE=1 SV=3	SC22B_RAT	Sec22b	25 kDa	0.2	0	0.390298	0	0.391314	0.3189	0.715548	0.0599	0.394623	0.281114	0.389001	0.188835
Cluster of solute carrier family 25 (mitochondrial carrier; oxoglutarate carrier), member 11, isoform CRA_b [Rattus norvegicus] (gi|149053212)	gi|149053212 [3]		?	-0.36	0	0.393637	0	0.392248	-0.1037	0.392248	-0.399	0.41396	0.230802	0.334489	-0.394254
Cluster of Glutathione S-transferase alpha-3 OS=Rattus norvegicus GN=Gsta3 PE=1 SV=3 (GSTA3_RAT)	GSTA3_RAT [5]	Gsta3	25 kDa	0.69	0	0.393486	0	0.396231	0.6643	0.644425	0.7483	0.616775	0.00351742	0.0321593	2.37157
Neurolysin, mitochondrial OS=Rattus norvegicus GN=Nln PE=1 SV=1	NEUL_RAT	Nln	80 kDa	-0.03	0	0.394488	0	0.39178	0.0305	0.642182	-0.1014	0.419768	0.644709	0.708758	-0.0103272
Protein DJ-1 OS=Rattus norvegicus GN=Park7 PE=1 SV=1	PARK7_RAT	Park7	20 kDa	0.59	0	0.39741	0	0.387256	0.6077	1.23066	0.5157	0.488654	0.00663994	0.0395308	1.9061
40S ribosomal protein S3 OS=Rattus norvegicus GN=Rps3 PE=1 SV=1	RS3_RAT	Rps3	27 kDa	0.42	0	0.390872	0	0.390568	0.4834	0.398459	0.3272	0.407192	0.0351841	0.0971861	0.979074
4-aminobutyrate aminotransferase, mitochondrial OS=Rattus norvegicus GN=Abat PE=1 SV=3	GABT_RAT	Abat	56 kDa	-0.02	0	0.39241	0	0.391966	0.0105	0.425948	-0.0388	0.442746	0.623897	0.694425	-0.00729343
Isocitrate dehydrogenase [NAD] subunit beta, mitochondrial OS=Rattus norvegicus GN=Idh3B PE=2 SV=1	IDH3B_RAT	Idh3B	42 kDa	-0.25	0	0.411828	0	0.398021	-0.2829	0.536148	-0.196	0.57103	0.031385	0.0923511	-0.595539
Synaptic vesicle glycoprotein 2A OS=Rattus norvegicus GN=Sv2a PE=1 SV=2	SV2A_RAT	Sv2a	83 kDa	-0.64	0	0.39302	0	0.389948	-0.6411	0.441952	-0.6483	0.425004	3.11795e-05	0.00319278	-3.67799
Cytochrome b-c1 complex subunit Rieske, mitochondrial OS=Rattus norvegicus GN=Uqcrfs1 PE=1 SV=2	UCRI_RAT	Uqcrfs1	29 kDa	-0.21	0	0.393375	0	0.394352	-0.2541	0.42099	-0.1592	0.409233	0.0488891	0.115477	-0.453323
Drebrin OS=Rattus norvegicus GN=Dbn1 PE=1 SV=3	DREB_RAT	Dbn1	77 kDa	-0.95	0	0.390996	0	0.392809	-1.0081	0.435239	-0.9091	0.623218	0.00265585	0.0289318	-3.36567
60S ribosomal protein L11 OS=Rattus norvegicus GN=Rpl11 PE=1 SV=2	RL11_RAT	Rpl11	20 kDa	0.2	0	0.393765	0	0.397612	0.2729	0.500685	0.1316	0.455541	0.103436	0.193282	0.328721
Cluster of 40S ribosomal protein S2 OS=Rattus norvegicus GN=Rps2 PE=1 SV=1 (RS2_RAT)	RS2_RAT [2]	Rps2	31 kDa	0.6	0	0.395657	0	0.397458	0.8471	0.429997	0.0485	0.895361	0.378658	0.484682	0.434557
Ubiquitin-conjugating enzyme E2 N OS=Rattus norvegicus GN=Ube2n PE=1 SV=1	UBE2N_RAT	Ube2n	17 kDa	0.38	0	0.393273	0	0.396157	0.2232	0.402906	0.5038	1.20678	0.122248	0.214353	0.58525
Cluster of cytochrome c oxidase subunit II (mitochondrion) [Rattus norvegicus] (gi|110189666)	gi|110189666 [3]		?	-0.02	0	0.39001	0	0.393712	0.0036	0.397433	-0.034	0.488033	0.503681	0.598341	-0.0102719
Enoyl-CoA hydratase, mitochondrial OS=Rattus norvegicus GN=Echs1 PE=1 SV=1	ECHM_RAT	Echs1	32 kDa	0.19	0	0.390403	0	0.391755	0.1429	0.427531	0.2629	0.411695	0.0774261	0.156503	0.352389
Lysosomal alpha-glucosidase OS=Rattus norvegicus GN=Gaa PE=2 SV=1	LYAG_RAT	Gaa	106 kDa	0.58	0	0.39052	0	0.389958	0.6156	0.515396	0.5371	0.431365	0.00460573	0.0341073	1.95938
Cluster of 60S acidic ribosomal protein P0 OS=Rattus norvegicus GN=Rplp0 PE=1 SV=2 (RLA0_RAT)	RLA0_RAT [2]	Rplp0	34 kDa	0.38	0	0.391483	0	0.391445	0.3896	0.412793	0.3689	0.406437	0.000743952	0.0146501	1.60486
Cluster of Serpin H1 OS=Rattus norvegicus GN=Serpinh1 PE=1 SV=1 (SERPH_RAT)	SERPH_RAT [3]	Serpinh1	47 kDa	0.57	0	0.39119	0	0.395382	0.464	0.471473	0.5757	0.83854	0.0113462	0.0532958	1.67118
F-actin-capping protein subunit alpha-2 OS=Rattus norvegicus GN=Capza2 PE=1 SV=1	CAZA2_RAT	Capza2	33 kDa	-0.08	0	0.390551	0	0.389406	-0.0667	0.41836	-0.0945	0.408359	0.028477	0.0880895	-0.194352
Myristoylated alanine-rich C-kinase substrate OS=Rattus norvegicus GN=Marcks PE=1 SV=2	MARCS_RAT	Marcks	30 kDa	0.58	0	0.395774	0	0.394064	0.7461	0.43746	0.4462	0.524773	0.0578336	0.127633	1.19399
Proteasome subunit alpha type-2 OS=Rattus norvegicus GN=Psma2 PE=1 SV=3	PSA2_RAT	Psma2	26 kDa	0.23	0	0.390665	0	0.393308	0.41	0.460741	0.123	0.422594	0.204413	0.307409	0.271302
40S ribosomal protein S9 OS=Rattus norvegicus GN=Rps9 PE=1 SV=4	RS9_RAT	Rps9	23 kDa	0.5	0	0.394651	0	0.39032	0.6385	0.39466	0.1498	0.459532	0.248068	0.356656	0.515492
Prosaposin OS=Rattus norvegicus GN=Psap PE=1 SV=1	SAP_RAT	Psap	61 kDa	0.82	0	0.3921	0	0.391104	0.9912	0.405766	0.6524	0.45471	0.0399611	0.102815	1.86536
Cluster of ATP synthase subunit g, mitochondrial [Rattus norvegicus] (gi|47058994)	gi|47058994 [2]		?	0.15	0	0.393302	0	0.399992	0.0551	0.399992	0.1775	0.609529	0.19777	0.299581	0.180806
Cluster of Cytochrome c oxidase subunit 6C-2 OS=Rattus norvegicus GN=Cox6c2 PE=1 SV=3 (CX6C2_RAT)	CX6C2_RAT [2]	Cox6c2	8 kDa	0.03	0	0.406442	0	0.390121	0.085	0.390535	-0.0044	0.415086	0.462441	0.565871	0.0170817
Glycine cleavage system H protein, mitochondrial OS=Rattus norvegicus GN=Gcsh PE=2 SV=1	GCSH_RAT	Gcsh	18 kDa	0.34	0	0.391497	0	0.389352	0.4444	0.412761	0.2659	0.413396	0.0577376	0.127633	0.699923
Astrocytic phosphoprotein PEA-15 OS=Rattus norvegicus GN=Pea15 PE=1 SV=1	PEA15_RAT	Pea15	15 kDa	0.41	0	0.388943	0	0.391519	0.5005	0.799945	0.351	0.396079	0.0294699	0.0892815	0.990544
Actin-related protein 3 OS=Rattus norvegicus GN=Actr3 PE=1 SV=1	ARP3_RAT	Actr3	47 kDa	-0.05	0	0.391972	0	0.389677	-0.1765	0.407311	-0.0238	0.457607	0.31996	0.426613	-0.0425939
Guanine nucleotide-binding protein G(q) subunit alpha OS=Rattus norvegicus GN=Gnaq PE=2 SV=2	GNAQ_RAT	Gnaq	42 kDa	-0.52	0	0.39072	0	0.407356	-0.4747	0.435954	-0.5531	0.40882	0.00576826	0.0364611	-1.72199
60S ribosomal protein L31 OS=Rattus norvegicus GN=Rpl31 PE=2 SV=1	RL31_RAT	Rpl31	14 kDa	0.38	0	0.401804	0	0.394796	0.1386	1.33683	0.6168	3.11432	0.254951	0.361593	0.38655
Alpha-synuclein OS=Rattus norvegicus GN=Snca PE=1 SV=1	SYUA_RAT	Snca	15 kDa	-0.83	0	0.390736	0	0.389398	-0.6358	0.394211	-0.9733	0.403089	0.0412874	0.104337	-1.87591
CD166 antigen OS=Rattus norvegicus GN=Alcam PE=1 SV=1	CD166_RAT	Alcam	65 kDa	-0.35	0	0.396766	0	0.393163	-0.5112	0.437019	-0.1531	1.30786	0.204739	0.307409	-0.412851
Cluster of Lamin-B1 OS=Rattus norvegicus GN=Lmnb1 PE=1 SV=3 (LMNB1_RAT)	LMNB1_RAT [3]	Lmnb1	67 kDa	0.36	0	0.393149	0	0.38604	-0.3924	0.38604	0.5188	0.468294	0.90238	0.93526	0.024095
60S ribosomal protein L18 OS=Rattus norvegicus GN=Rpl18 PE=1 SV=2	RL18_RAT	Rpl18	22 kDa	0.44	0	0.387654	0	0.39309	0.6146	0.438608	0.2115	0.421201	0.176948	0.277906	0.563408
Dynactin subunit 1 OS=Rattus norvegicus GN=Dctn1 PE=1 SV=2	DCTN1_RAT	Dctn1	142 kDa	-0.15	0	0.388696	0	0.389294	-0.4019	0.668353	-0.0822	0.42214	0.269169	0.374496	-0.147326
ELAV-like protein 1 OS=Rattus norvegicus GN=Elavl1 PE=1 SV=1	ELAV1_RAT	Elavl1	36 kDa	-0.22	0	0.393371	0	0.396189	-0.0817	0.509635	-0.2902	0.574015	0.216408	0.320234	-0.250515
Sodium- and chloride-dependent GABA transporter 1 OS=Rattus norvegicus GN=Slc6a1 PE=1 SV=1	SC6A1_RAT	Slc6a1	67 kDa	-0.61	0	0.391768	0	0.390133	-0.6712	0.433013	-0.5366	0.470542	0.0121927	0.0557381	-1.76113
Cluster of Non-specific lipid-transfer protein OS=Rattus norvegicus GN=Scp2 PE=1 SV=3 (NLTP_RAT)	NLTP_RAT [2]	Scp2	59 kDa	0.37	0	0.393192	0	0.390029	0.4972	0.499522	0.2575	0.434028	0.0877947	0.172888	0.649391
Cluster of Sideroflexin-1 OS=Rattus norvegicus GN=Sfxn1 PE=2 SV=4 (SFXN1_RAT)	SFXN1_RAT [3]	Sfxn1	36 kDa	-0.02	0	0.391231	0	0.38818	0.0686	0.455841	-0.0453	0.773725	0.85684	0.898401	-0.00214278
Sideroflexin-5 OS=Rattus norvegicus GN=Sfxn5 PE=2 SV=1	SFXN5_RAT	Sfxn5	37 kDa	0.22	0	0.392586	0	0.391112	0.0224	0.467359	0.3236	0.514457	0.36951	0.476547	0.163062
26S proteasome non-ATPase regulatory subunit 2 OS=Rattus norvegicus GN=Psmd2 PE=1 SV=1	PSMD2_RAT	Psmd2	100 kDa	0.13	0	0.402096	0	0.39167	0.0688	0.583872	0.1821	0.4339	0.157202	0.256329	0.176968
Cluster of Beta-soluble NSF attachment protein OS=Rattus norvegicus GN=Napb PE=1 SV=1 (SNAB_RAT)	SNAB_RAT [3]	Napb	33 kDa	-0.71	0	0.389744	0	0.388761	-0.7424	0.408957	-0.7013	0.395807	0.000809473	0.01535	-2.96541
Cluster of 60S ribosomal protein L7 OS=Rattus norvegicus GN=Rpl7 PE=1 SV=2 (RL7_RAT)	RL7_RAT [3]	Rpl7	30 kDa	0.63	0	0.394509	0	0.390183	0.856	0.390183	0.5425	0.549202	0.0467554	0.112919	1.37408
40S ribosomal protein S23 OS=Rattus norvegicus GN=Rps23 PE=1 SV=3	RS23_RAT (+1)	Rps23	16 kDa	0.58	0	0.392744	0	0.393438	0.7508	0.417628	0.4071	0.404899	0.077946	0.156503	1.07571
Beta-synuclein OS=Rattus norvegicus GN=Sncb PE=1 SV=1	SYUB_RAT	Sncb	15 kDa	-0.27	0	0.390867	0	0.389995	-0.2242	0.417349	-0.3279	0.467229	0.0335159	0.0961579	-0.632276
Cluster of Chain A, Ampa Subtype Ionotropic Glutamate Receptor In Complex With Competitive Antagonist Zk 200775 (gi|270346725)	gi|270346725 [7]		?	-0.49	0	0.390242	0	0.388953	-0.5516	0.418777	-0.465	0.426585	0.0071786	0.0417737	-1.55599
Limbic system-associated membrane protein OS=Rattus norvegicus GN=Lsamp PE=1 SV=1	LSAMP_RAT	Lsamp	37 kDa	-0.49	0	0.390272	0	0.389859	-0.4308	0.408843	-0.5551	0.401099	0.0155264	0.0621054	-1.36167
Isocitrate dehydrogenase [NADP], mitochondrial OS=Rattus norvegicus GN=Idh2 PE=1 SV=2	IDHP_RAT	Idh2	51 kDa	0.3	0	0.392247	0	0.403159	0.3387	0.417253	0.2841	0.42652	0.0075983	0.0429346	0.944424
Cluster of ribophorin I, isoform CRA_a [Rattus norvegicus] (gi|149036687)	gi|149036687 [3]		?	0.37	0	0.391527	0	0.394848	0.0726	0.394848	0.4192	0.908127	0.291718	0.400428	0.338632
Thioredoxin-dependent peroxide reductase, mitochondrial OS=Rattus norvegicus GN=Prdx3 PE=1 SV=2	PRDX3_RAT	Prdx3	28 kDa	-0.55	0	0.390572	0	0.395827	-0.5964	0.799081	-0.4824	0.396976	0.0109831	0.0531526	-1.61402
Reticulon-3 OS=Rattus norvegicus GN=Rtn3 PE=1 SV=1	RTN3_RAT	Rtn3	102 kDa	-0.38	0	0.390231	0	0.390855	0.0056	0.467503	-0.633	0.525158	0.42946	0.53893	-0.234905
Annexin A2 OS=Rattus norvegicus GN=Anxa2 PE=1 SV=2	ANXA2_RAT	Anxa2	39 kDa	0.44	0	0.394065	0	0.396918	-0.0134	1.474	0.9023	0.497363	0.434081	0.542071	0.269437
Cathepsin D OS=Rattus norvegicus GN=Ctsd PE=1 SV=1	CATD_RAT	Ctsd	45 kDa	0.49	0	0.390425	0	0.391374	0.3682	0.486381	0.5873	0.598838	0.0487662	0.115477	1.05775
Cluster of Myosin light polypeptide 6 OS=Rattus norvegicus GN=Myl6 PE=1 SV=3 (MYL6_RAT)	MYL6_RAT [3]	Myl6	17 kDa	0.42	0	0.390044	0	0.391423	0.359	0.394965	0.4529	0.405038	0.0131135	0.0565951	1.20617
Dynamin-like 120 kDa protein, mitochondrial OS=Rattus norvegicus GN=Opa1 PE=1 SV=1	OPA1_RAT	Opa1	111 kDa	-0.66	0	0.392886	0	0.389067	-0.6221	0.393086	-0.7	0.498944	0.00345376	0.0321593	-2.26846
T-complex protein 1 subunit delta OS=Rattus norvegicus GN=Cct4 PE=1 SV=3	TCPD_RAT	Cct4	58 kDa	-0.05	0	0.401127	0	0.394848	0.3305	0.394848	-0.1115	0.423508	0.669352	0.730941	-0.0156711
Cluster of Sideroflexin-3 OS=Rattus norvegicus GN=Sfxn3 PE=2 SV=1 (SFXN3_RAT)	SFXN3_RAT [2]	Sfxn3	35 kDa	-0.47	0	0.389979	0	0.390581	-0.5022	0.425432	-0.4365	0.428938	0.00486295	0.0341073	-1.58777
Kinesin-like protein KIF2A OS=Rattus norvegicus GN=Kif2a PE=1 SV=2	KIF2A_RAT	Kif2a	80 kDa	-0.55	0	0.413176	0	0.426659	-0.5769	0.433257	-0.5056	0.494944	0.00431031	0.0341073	-1.85803
Peroxisomal multifunctional enzyme type 2 OS=Rattus norvegicus GN=Hsd17b4 PE=1 SV=3	DHB4_RAT	Hsd17b4	79 kDa	0.03	0	0.407001	0	0.393274	-0.0695	0.439012	0.1432	0.470561	0.762028	0.812751	0.00621991
NADH-cytochrome b5 reductase 3 OS=Rattus norvegicus GN=Cyb5r3 PE=1 SV=2	NB5R3_RAT (+2)	Cyb5r3	34 kDa	0.18	0	0.390249	0	0.391037	0.2336	0.542993	0.0765	0.499828	0.187102	0.289414	0.223181
Filamin-C OS=Rattus norvegicus GN=Flnc PE=1 SV=1	FLNC_RAT	Flnc	291 kDa	1.18	0	0.403613	0	0.400621	0.8876	0.451293	1.4231	0.471385	0.0497345	0.116274	2.53913
Mitochondrial fission 1 protein OS=Rattus norvegicus GN=Fis1 PE=1 SV=1	FIS1_RAT	Fis1	17 kDa	0.41	0	0.391463	0	0.392821	0.5551	0.503152	0.2263	0.403541	0.140646	0.238447	0.58778
Neurochondrin OS=Rattus norvegicus GN=Ncdn PE=1 SV=2	NCDN_RAT	Ncdn	79 kDa	-0.53	0	0.392561	0	0.39026	-0.442	0.508132	-0.6501	0.604301	0.0344444	0.096369	-1.23997
60S acidic ribosomal protein P2 OS=Rattus norvegicus GN=Rplp2 PE=1 SV=2	RLA2_RAT	Rplp2	12 kDa	0.52	0	0.390686	0	0.38945	0.4583	0.41043	0.5746	0.470411	0.0124417	0.0558784	1.49998
Tricarboxylate transport protein, mitochondrial OS=Rattus norvegicus GN=Slc25a1 PE=1 SV=1	TXTP_RAT	Slc25a1	34 kDa	-0.42	0	0.390425	0	0.391531	-0.4559	0.86578	-0.3477	0.595331	0.0176505	0.0689851	-1.12302
Very-long-chain 3-oxoacyl-CoA reductase OS=Rattus norvegicus GN=Hsd17b12 PE=2 SV=1	DHB12_RAT	Hsd17b12	35 kDa	0.15	0	0.387665	0	0.391682	0.1852	0.398366	0.1049	0.394419	0.0688051	0.141479	0.293341
Isocitrate dehydrogenase [NADP] cytoplasmic OS=Rattus norvegicus GN=Idh1 PE=1 SV=1	IDHC_RAT	Idh1	47 kDa	-0.17	0	0.392195	0	0.397939	-0.0386	0.413138	-0.2316	0.545461	0.296474	0.405868	-0.153294
ATP-dependent 6-phosphofructokinase, platelet type OS=Rattus norvegicus GN=Pfkp PE=1 SV=2	PFKAP_RAT	Pfkp	86 kDa	-0.43	0	0.390675	0	0.389611	-0.5486	0.391783	-0.3432	0.406534	0.0491681	0.115477	-0.928233
Cluster of Ras-related protein Ral-A OS=Rattus norvegicus GN=Rala PE=1 SV=1 (RALA_RAT)	RALA_RAT [2]	Rala	24 kDa	-0.06	0	0.388748	0	0.389755	0.081	0.395301	-0.1463	0.407902	0.800925	0.847259	-0.00994493
60S ribosomal protein L12 OS=Rattus norvegicus GN=Rpl12 PE=2 SV=1	RL12_RAT	Rpl12	18 kDa	0.42	0	0.394691	0	0.389558	0.4675	0.431321	0.3049	0.432105	0.0415717	0.104337	0.949255
Succinate--CoA ligase [ADP/GDP-forming] subunit alpha, mitochondrial OS=Rattus norvegicus GN=Suclg1 PE=2 SV=2	SUCA_RAT	Suclg1	36 kDa	-0.17	0	0.390602	0	0.389257	-0.1021	0.412464	-0.2697	0.418552	0.156772	0.256329	-0.23142
Transmembrane emp24 domain-containing protein 10 OS=Rattus norvegicus GN=Tmed10 PE=1 SV=2	TMEDA_RAT	Tmed10	25 kDa	0.16	0	0.395343	0	0.392126	0.2008	0.509016	0.1262	0.403152	0.0483054	0.115477	0.345389
Aspartate aminotransferase, cytoplasmic OS=Rattus norvegicus GN=Got1 PE=1 SV=3	AATC_RAT	Got1	46 kDa	-0.28	0	0.390128	0	0.393575	-0.2807	0.475152	-0.2726	0.571474	0.000214244	0.0121195	-1.23562
Cell cycle exit and neuronal differentiation protein 1 OS=Rattus norvegicus GN=Cend1 PE=1 SV=1	CEND_RAT	Cend1	15 kDa	-0.6	0	0.392681	0	0.392676	-0.6135	0.410985	-0.5904	0.410261	0.000367962	0.0144844	-2.54081
Trifunctional enzyme subunit beta, mitochondrial OS=Rattus norvegicus GN=Hadhb PE=1 SV=1	ECHB_RAT	Hadhb	51 kDa	0.08	0	0.400965	0	0.416152	0.0608	0.533024	0.1235	0.406104	0.0988725	0.187492	0.133922
Pyruvate dehydrogenase E1 component subunit alpha, somatic form, mitochondrial OS=Rattus norvegicus GN=Pdha1 PE=1 SV=2	ODPA_RAT	Pdha1	43 kDa	-0.16	0	0.389704	0	0.391139	-0.4015	0.526507	0.0163	1.52937	0.453874	0.558614	-0.0931674
Membrane-associated progesterone receptor component 1 OS=Rattus norvegicus GN=Pgrmc1 PE=1 SV=3	PGRC1_RAT	Pgrmc1	22 kDa	-0.08	0	0.391081	0	0.393164	0.0023	0.447102	-0.1219	0.483823	0.437171	0.543281	-0.0488103
40S ribosomal protein S11 OS=Rattus norvegicus GN=Rps11 PE=1 SV=3	RS11_RAT	Rps11	18 kDa	0.48	0	0.402818	0	0.389756	0.7773	0.39055	0.3108	0.586323	0.144898	0.244029	0.677025
Profilin-2 OS=Rattus norvegicus GN=Pfn2 PE=1 SV=3	PROF2_RAT (+3)	Pfn2	15 kDa	-0.34	0	0.391655	0	0.391376	-0.2886	0.41081	-0.3903	0.438255	0.0217122	0.0776862	-0.868726
Lanosterol synthase OS=Rattus norvegicus GN=Lss PE=1 SV=2	ERG7_RAT	Lss	83 kDa	-0.09	0	0.393108	0	0.389102	0.0219	0.468248	-0.1775	0.498406	0.516882	0.604209	-0.0453451
Isovaleryl-CoA dehydrogenase, mitochondrial OS=Rattus norvegicus GN=Ivd PE=1 SV=2	IVD_RAT	Ivd	46 kDa	0.02	0	0.393143	0	0.391617	0.2072	0.477113	-0.2063	0.539343	0.998461	0.998461	3.08046e-05
ELKS/Rab6-interacting/CAST family member 1 OS=Rattus norvegicus GN=Erc1 PE=1 SV=1	RB6I2_RAT	Erc1	109 kDa	-0.28	0	0.415274	0	0.408647	-0.281	0.440593	-0.2759	0.492272	8.38554e-05	0.00536675	-1.46371
Cluster of 40S ribosomal protein S4, X isoform OS=Rattus norvegicus GN=Rps4x PE=2 SV=2 (RS4X_RAT)	RS4X_RAT [2]	Rps4x	30 kDa	0.14	0	0.405988	0	0.411605	-0.0503	0.42631	0.3279	0.416354	0.539333	0.624748	0.065857
Eukaryotic translation initiation factor 5A-1 OS=Rattus norvegicus GN=Eif5a PE=1 SV=3	IF5A1_RAT	Eif5a	17 kDa	0.38	0	0.393953	0	0.38921	0.4265	0.403055	0.3373	0.423528	0.0133658	0.0570274	1.0884
NADPH--cytochrome P450 reductase OS=Rattus norvegicus GN=Por PE=1 SV=3	NCPR_RAT	Por	77 kDa	0.26	0	0.389769	0	0.392947	0.3966	0.689851	-0.1711	0.394393	0.729589	0.784768	0.0630154
Cluster of cAMP-dependent protein kinase catalytic subunit beta OS=Rattus norvegicus GN=Prkacb PE=1 SV=2 (KAPCB_RAT)	KAPCB_RAT [2]	Prkacb	41 kDa	-0.44	0	0.389077	0	0.387885	-0.336	0.389812	-0.4936	0.389954	0.0342459	0.096369	-1.02941
NADH dehydrogenase [ubiquinone] 1 alpha subcomplex subunit 10, mitochondrial OS=Rattus norvegicus GN=Ndufa10 PE=1 SV=1	NDUAA_RAT (+2)	Ndufa10	40 kDa	-0.35	0	0.390872	0	0.392689	-0.3112	0.433514	-0.5458	0.436998	0.0674438	0.14085	-0.686022
Cluster of 60S ribosomal protein L10a OS=Rattus norvegicus GN=Rpl10a PE=1 SV=2 (RL10A_RAT)	RL10A_RAT [5]	Rpl10a	25 kDa	0.18	0	0.390044	0	0.392429	0.3612	0.402358	0.138	0.424676	0.154793	0.254019	0.246662
3-mercaptopyruvate sulfurtransferase OS=Rattus norvegicus GN=Mpst PE=1 SV=3	THTM_RAT	Mpst	33 kDa	-0.09	0	0.396656	0	0.39781	-0.0654	0.410386	-0.1104	0.650307	0.0597134	0.129179	-0.18419
Cluster of Dynein light chain 1, cytoplasmic OS=Rattus norvegicus GN=Dynll1 PE=1 SV=1 (DYL1_RAT)	DYL1_RAT [3]	Dynll1	10 kDa	0.03	0	0.390542	0	0.388087	-0.0565	0.410701	0.0605	0.395099	0.975832	0.980955	0.00057685
Cluster of PREDICTED: mitochondrial glutamate carrier 1 [Rattus norvegicus] (gi|392344738)	gi|392344738 [2]		?	-0.74	0	0.390806	0	0.389151	-0.7776	0.396888	-0.6804	0.401291	0.00441503	0.0341073	-2.4999
Electron transfer flavoprotein subunit beta OS=Rattus norvegicus GN=Etfb PE=2 SV=3	ETFB_RAT	Etfb	28 kDa	0.05	0	0.393725	0	0.38999	0.0929	0.391848	-0.0202	0.400746	0.586213	0.659651	0.0208022
Cluster of Creatine kinase U-type, mitochondrial OS=Rattus norvegicus GN=Ckmt1 PE=1 SV=1 (KCRU_RAT)	KCRU_RAT [3]	Ckmt1	47 kDa	-0.8	0	0.389798	0	0.388982	-1.203	0.388982	-0.742	0.414402	0.0518473	0.119576	-1.69904
40S ribosomal protein SA OS=Rattus norvegicus GN=Rpsa PE=1 SV=3	RSSA_RAT (+3)	Rpsa	33 kDa	0.39	0	0.399251	0	0.390191	0.6043	0.734617	-0.1103	0.802849	0.56084	0.642394	0.172596
Heat shock protein 75 kDa, mitochondrial OS=Rattus norvegicus GN=Trap1 PE=1 SV=1	TRAP1_RAT	Trap1	80 kDa	-0.32	0	0.39201	0	0.39632	-0.2202	0.398434	-0.3623	0.488759	0.0546759	0.124418	-0.666915
Elongation factor Tu, mitochondrial OS=Rattus norvegicus GN=Tufm PE=1 SV=1	EFTU_RAT	Tufm	50 kDa	-0.36	0	0.389671	0	0.390456	-0.316	0.604147	-0.3988	0.548453	0.0131539	0.0565951	-1.03386
Electron transfer flavoprotein subunit alpha, mitochondrial OS=Rattus norvegicus GN=Etfa PE=1 SV=4	ETFA_RAT	Etfa	35 kDa	-0.34	0	0.390943	0	0.390256	-0.4298	0.654555	-0.2613	0.578975	0.0546205	0.124418	-0.708597
Peptidyl-prolyl cis-trans isomerase FKBP1A OS=Rattus norvegicus GN=Fkbp1a PE=1 SV=3	FKB1A_RAT	Fkbp1a	12 kDa	-0.18	0	0.395961	0	0.392008	-0.1699	0.414621	-0.1904	0.467701	0.00322164	0.0321593	-0.61867
Heterochromatin protein 1-binding protein 3 OS=Rattus norvegicus GN=Hp1bp3 PE=1 SV=1	HP1B3_RAT	Hp1bp3	61 kDa	0.08	0	0.396597	0	0.390157	0.3228	0.442534	-0.109	0.44524	0.669553	0.730941	0.0250738
Neurocalcin-delta OS=Rattus norvegicus GN=Ncald PE=1 SV=3	NCALD_RAT (+1)	Ncald	22 kDa	-0.12	0	0.393481	0	0.389089	-0.1166	0.730586	-0.1241	0.723654	0.000969479	0.0169362	-0.489396
Cytochrome b-c1 complex subunit 8 OS=Rattus norvegicus GN=Uqcrq PE=3 SV=1	QCR8_RAT	Uqcrq	10 kDa	0.02	0	0.394197	0	0.395575	0.116	0.402851	-0.0554	0.402103	0.757461	0.809645	0.00422319
Cluster of GTPase HRas OS=Rattus norvegicus GN=Hras PE=1 SV=2 (RASH_RAT)	RASH_RAT [3]	Hras	21 kDa	-0.18	0	0.390225	0	0.391438	-0.0253	0.501871	-0.2605	0.413626	0.348296	0.454917	-0.141775
Cluster of Cytochrome c, somatic OS=Rattus norvegicus GN=Cycs PE=1 SV=2 (CYC_RAT)	CYC_RAT [2]	Cycs	12 kDa	-0.51	0	0.388341	0	0.392191	-0.63	0.813126	-0.397	0.625167	0.0478108	0.114925	-1.10337
Protein S100-B OS=Rattus norvegicus GN=S100b PE=1 SV=2	S100B_RAT (+3)	S100b	11 kDa	1.06	0	0.391788	0	0.389659	1.1313	0.395786	0.9179	0.399095	0.0106715	0.0530466	3.11278
Mitochondrial import receptor subunit TOM22 homolog OS=Rattus norvegicus GN=Tomm22 PE=1 SV=1	TOM22_RAT	Tomm22	15 kDa	-0.18	0	0.3919	0	0.392115	-0.1123	0.421834	-0.2717	0.420098	0.137618	0.234868	-0.260772
Microtubule-associated protein RP/EB family member 2 OS=Rattus norvegicus GN=Mapre2 PE=1 SV=1	MARE2_RAT	Mapre2	37 kDa	-0.14	0	0.388261	0	0.393815	-0.1979	0.495615	0.0235	0.392193	0.513394	0.604209	-0.0705368
Complement component 1 Q subcomponent-binding protein, mitochondrial OS=Rattus norvegicus GN=C1qbp PE=1 SV=2	C1QBP_RAT (+1)	C1qbp	31 kDa	-0.05	0	0.39154	0	0.390583	0.0667	0.414518	-0.1659	0.408649	0.711274	0.76992	-0.0130734
D-dopachrome decarboxylase OS=Rattus norvegicus GN=Ddt PE=1 SV=3	DOPD_RAT (+1)	Ddt	13 kDa	0.38	0	0.807886	0	0.873128	0.4535	0.883236	0.3038	0.810168	0.036925	0.10003	0.874869
Transmembrane protein 35A OS=Rattus norvegicus GN=Tmem35a PE=1 SV=1	TM35A_RAT	Tmem35a	18 kDa	-0.3	0	0.405849	0	0.399841	-0.2683	0.429912	-0.3436	0.421634	0.0148081	0.0616237	-0.836013
Neuropilin-2 OS=Rattus norvegicus GN=Nrp2 PE=2 SV=1	NRP2_RAT (+9)	Nrp2	104 kDa	-0.34	0	0.390594	0	0.392604	-0.6721	0.454629	-0.0067	0.978544	0.414976	0.52591	-0.218492
Ras-related protein Rab-31 OS=Rattus norvegicus GN=Rab31 PE=1 SV=2	RAB31_RAT	Rab31	21 kDa	0.15	0	0.390575	0	0.3893	0.1554	0.390211	0.1406	0.39578	0.00249066	0.0289318	0.531422
60S ribosomal protein L26 OS=Rattus norvegicus GN=Rpl26 PE=1 SV=1	RL26_RAT	Rpl26	17 kDa	-0.08	0	0.394504	0	0.402376	0.0835	1.3734	-0.2855	1.54649	0.639013	0.706641	-0.0277787
Septin-7 OS=Rattus norvegicus GN=Sept7 PE=1 SV=1	SEPT7_RAT	Sept7	51 kDa	0.18	0	0.391179	0	0.390205	0.1705	0.398159	0.1816	0.414167	0.000992355	0.0169362	0.734094
U5 small nuclear ribonucleoprotein 200 kDa helicase OS=Rattus norvegicus GN=Snrnp200 PE=1 SV=1	U520_RAT	Snrnp200	245 kDa	-0.03	0	0.438575	0	0.425832	-0.2094	0.425832	0.0329	0.695129	0.542092	0.625698	-0.0140666
Myotrophin OS=Rattus norvegicus GN=Mtpn PE=1 SV=2	MTPN_RAT (+1)	Mtpn	13 kDa	0.35	0	0.392132	0	0.391704	0.6112	0.757233	0.094	0.408669	0.30592	0.413274	0.309275
Delta-1-pyrroline-5-carboxylate dehydrogenase, mitochondrial OS=Rattus norvegicus GN=Aldh4a1 PE=1 SV=1	AL4A1_RAT	Aldh4a1	62 kDa	0.06	0	0.389253	0	0.38859	-0.0433	0.410376	0.1362	0.402028	0.656329	0.719572	0.0197459
CB1 cannabinoid receptor-interacting protein 1 OS=Rattus norvegicus GN=Cnrip1 PE=1 SV=1	CNRP1_RAT (+1)	Cnrip1	19 kDa	-0.31	0	0.392392	0	0.39331	-0.2644	0.425105	-0.3787	0.392923	0.0301669	0.0908109	-0.743682
40S ribosomal protein S6 OS=Rattus norvegicus GN=Rps6 PE=1 SV=1	RS6_RAT	Rps6	29 kDa	0.74	0	0.391254	0	0.39012	0.8828	0.436015	0.4408	0.391485	0.0957643	0.183743	1.25372
Neurofilament light polypeptide OS=Rattus norvegicus GN=Nefl PE=1 SV=3	NFL_RAT	Nefl	61 kDa	-0.66	0	0.387249	0	0.390651	-0.4834	0.45138	-0.8499	0.40841	0.067949	0.14085	-1.29364
Cluster of Up-regulated during skeletal muscle growth protein 5 OS=Rattus norvegicus GN=Usmg5 PE=1 SV=1 (USMG5_RAT)	USMG5_RAT [3]	Usmg5	6 kDa	-0.27	0	0.389448	0	0.390332	-0.1957	0.391589	-0.3261	0.392282	0.0571508	0.127633	-0.555821
Dihydropyrimidinase-related protein 4 (Fragment) OS=Rattus norvegicus GN=Dpysl4 PE=1 SV=1	DPYL4_RAT	Dpysl4	61 kDa	-0.38	0	0.389312	0	0.389896	-0.5133	0.595639	0.0684	0.630619	0.524296	0.61148	-0.186912
60S ribosomal protein L13a OS=Rattus norvegicus GN=Rpl13a PE=1 SV=2	RL13A_RAT	Rpl13a	23 kDa	0.4	0	0.391758	0	0.391938	0.4883	0.43644	0.2741	0.409468	0.0706702	0.143584	0.776334
Cluster of 60S ribosomal protein L23 OS=Rattus norvegicus GN=Rpl23 PE=2 SV=1 (RL23_RAT)	RL23_RAT [2]	Rpl23	15 kDa	0.12	0	0.394798	0	0.406384	-0.0758	0.945125	0.254	0.492714	0.643094	0.708758	0.0413089
Mitochondrial import receptor subunit TOM70 OS=Rattus norvegicus GN=Tomm70 PE=1 SV=1	TOM70_RAT	Tomm70	67 kDa	-0.65	0	0.389882	0	0.389686	-0.8052	0.396903	-0.5364	0.397159	0.0378771	0.101006	-1.49018
Lysosome-associated membrane glycoprotein 2 OS=Rattus norvegicus GN=Lamp2 PE=1 SV=3	LAMP2_RAT	Lamp2	45 kDa	0.02	0	0.404474	0	0.389432	0.2811	0.509099	-0.2676	0.642243	0.982605	0.984528	0.000311856
Myc box-dependent-interacting protein 1 OS=Rattus norvegicus GN=Bin1 PE=1 SV=1	BIN1_RAT	Bin1	65 kDa	-0.77	0	0.391249	0	0.393589	-0.8208	0.417216	-0.6805	0.416454	0.00862057	0.0464604	-2.36325
Platelet-activating factor acetylhydrolase IB subunit gamma OS=Rattus norvegicus GN=Pafah1b3 PE=2 SV=1	PA1B3_RAT	Pafah1b3	26 kDa	-0.08	0	0.397695	0	0.420813	-0.1017	0.420837	-0.046	0.397695	0.117643	0.209747	-0.124948
Cluster of 60S ribosomal protein L7a OS=Rattus norvegicus GN=Rpl7a PE=1 SV=2 (RL7A_RAT)	RL7A_RAT [2]	Rpl7a	30 kDa	0.75	0	0.395817	0	0.388849	0.9294	0.458158	0.0036	0.395817	0.419668	0.530543	0.47539
Adenine phosphoribosyltransferase OS=Rattus norvegicus GN=Aprt PE=1 SV=1	APT_RAT	Aprt	20 kDa	-0.04	0	0.405908	0	0.391783	0.1426	0.40613	-0.1753	0.584044	0.927457	0.949716	-0.0020637
Dephospho-CoA kinase domain-containing protein OS=Rattus norvegicus GN=Dcakd PE=2 SV=1	DCAKD_RAT	Dcakd	27 kDa	0.35	0	0.387697	0	0.391053	0.4085	0.431996	0.2885	0.407244	0.0283853	0.0880895	0.850291
Cluster of Lysosome-associated membrane glycoprotein 1 OS=Rattus norvegicus GN=Lamp1 PE=1 SV=1 (LAMP1_RAT)	LAMP1_RAT [2]	Lamp1	44 kDa	0.23	0	0.390428	0	0.388126	0.5156	0.388126	0.1733	0.507314	0.181805	0.28466	0.288985
Cluster of Polyadenylate-binding protein 1 OS=Rattus norvegicus GN=Pabpc1 PE=1 SV=1 (PABP1_RAT)	PABP1_RAT [10]	Pabpc1	71 kDa	0.08	0	0.39017	0	0.388851	0.2403	0.388851	0.0594	0.605171	0.239423	0.345308	0.0850654
60S ribosomal protein L21 OS=Rattus norvegicus GN=Rpl21 PE=1 SV=3	RL21_RAT	Rpl21	18 kDa	0.45	0	0.391601	0	0.387638	0.4994	0.393096	0.3735	0.394772	0.0201754	0.0748537	1.1665
Lactadherin OS=Rattus norvegicus GN=Mfge8 PE=2 SV=1	MFGM_RAT	Mfge8	47 kDa	0.46	0	0.390522	0	0.390529	-0.1817	0.817294	0.8629	0.639361	0.581259	0.655516	0.194273
Thioredoxin OS=Rattus norvegicus GN=Txn PE=1 SV=2	THIO_RAT (+1)	Txn	12 kDa	0.06	0	0.390541	0	0.389312	-0.0045	0.445877	0.1229	0.391033	0.450816	0.556187	0.0351991
Tubulin-specific chaperone A OS=Rattus norvegicus GN=Tbca PE=1 SV=1	TBCA_RAT	Tbca	13 kDa	0.31	0	0.387652	0	0.390183	0.4648	0.390183	0.2362	0.430872	0.0919178	0.178943	0.533414
Stathmin OS=Rattus norvegicus GN=Stmn1 PE=1 SV=2	STMN1_RAT	Stmn1	17 kDa	0.16	0	0.395444	0	0.398182	0.2507	0.398182	0.066	0.395768	0.22854	0.332793	0.176038
Cluster of Calcium-dependent secretion activator 1 OS=Rattus norvegicus GN=Cadps PE=1 SV=1 (CAPS1_RAT)	CAPS1_RAT [2]	Cadps	146 kDa	0.01	0	0.395688	0	0.407587	-0.4507	0.407587	0.0657	0.960207	0.533655	0.619572	0.00478727
CAP-Gly domain-containing linker protein 2 OS=Rattus norvegicus GN=Clip2 PE=1 SV=1	CLIP2_RAT	Clip2	115 kDa	-0.61	0	0.387886	0	0.394681	-0.7327	0.438877	-0.435	0.393718	0.0592769	0.129179	-1.2484
N(G),N(G)-dimethylarginine dimethylaminohydrolase 2 OS=Rattus norvegicus GN=Ddah2 PE=1 SV=1	DDAH2_RAT (+2)	Ddah2	30 kDa	0.03	0	0.388751	0	0.390944	0.0701	0.419955	-0.0082	0.45858	0.512059	0.604209	0.015115
Platelet-activating factor acetylhydrolase IB subunit beta OS=Rattus norvegicus GN=Pafah1b2 PE=1 SV=1	PA1B2_RAT	Pafah1b2	26 kDa	-0.15	0	0.392816	0	0.389983	-0.137	0.406895	-0.1682	0.397371	0.0102896	0.0521609	-0.443013
60S ribosomal protein L27 OS=Rattus norvegicus GN=Rpl27 PE=2 SV=2	RL27_RAT	Rpl27	16 kDa	0.51	0	0.397202	0	0.396181	0.6179	0.405729	0.301	0.428296	0.101201	0.190496	0.845644
Beta-2-microglobulin OS=Rattus norvegicus GN=B2m PE=1 SV=1	B2MG_RAT	B2m	14 kDa	0.79	0	0.394893	0	0.405731	0.9949	0.412023	0.6612	0.482289	0.0382848	0.101564	1.80678
Receptor of activated protein C kinase 1 OS=Rattus norvegicus GN=Rack1 PE=1 SV=3	RACK1_RAT	Rack1	35 kDa	0.66	0	0.389312	0	0.394019	0.6447	0.417299	0.6998	0.393454	0.00167529	0.023852	2.46569
Cluster of Dolichyl-diphosphooligosaccharide--protein glycosyltransferase subunit 2 OS=Rattus norvegicus GN=Rpn2 PE=2 SV=2 (RPN2_RAT)	RPN2_RAT [6]	Rpn2	69 kDa	-0.16	0	0.396591	0	0.400699	-0.1598	0.439578	-0.1604	0.633946	3.51122e-06	0.000599248	-1.18717
Kinesin-like protein KIF21B OS=Rattus norvegicus GN=Kif21b PE=1 SV=2	KI21B_RAT	Kif21b	183 kDa	-0.87	0	0.425832	0	0.397377	-1.0396	0.49801	-0.4714	0.425832	0.117087	0.20961	-1.35938
Barrier-to-autointegration factor OS=Rattus norvegicus GN=Banf1 PE=1 SV=1	BAF_RAT (+1)	Banf1	10 kDa	0.03	0	0.404255	0	0.393239	0.2849	0.399425	-0.2406	0.596509	0.940496	0.955425	0.00136798
Hemoglobin subunit alpha-1/2 OS=Rattus norvegicus GN=Hba1 PE=1 SV=3	HBA_RAT	Hba1	15 kDa	-0.46	0	0.775945	0	1.28985	0.2898	1.46905	-1.0066	7.09741	0.63587	0.704687	-0.161
Cluster of Myosin regulatory light chain 12B OS=Rattus norvegicus GN=Myl12b PE=1 SV=3 (ML12B_RAT)	ML12B_RAT [9]	Myl12b	20 kDa	0.16	0	0.391416	0	0.388572	0.1025	0.495779	0.2607	0.400246	0.148573	0.246179	0.224271
Syntaxin-1A OS=Rattus norvegicus GN=Stx1a PE=1 SV=1	STX1A_RAT	Stx1a	33 kDa	-0.48	0	0.390536	0	0.398757	-0.384	0.543702	-0.5356	0.406548	0.026117	0.0854568	-1.18068
CDGSH iron-sulfur domain-containing protein 1 OS=Rattus norvegicus GN=Cisd1 PE=3 SV=1	CISD1_RAT	Cisd1	12 kDa	-1.06	0	0.391016	0	0.405271	-1.4327	1.22101	-0.3966	0.395254	0.219512	0.322959	-1.19804
ATP-binding cassette sub-family D member 3 OS=Rattus norvegicus GN=Abcd3 PE=1 SV=3	ABCD3_RAT	Abcd3	75 kDa	0.34	0	0.394279	0	0.392163	0.1108	0.39895	0.4927	0.632501	0.254829	0.361593	0.34586
Eukaryotic translation initiation factor 3 subunit C OS=Rattus norvegicus GN=Eif3c PE=1 SV=1	EIF3C_RAT	Eif3c	105 kDa	0.45	0	0.3965	0	0.389594	0.4666	0.467958	0.442	0.408446	0.00073223	0.0146501	1.90049
Neurabin-2 OS=Rattus norvegicus GN=Ppp1r9b PE=1 SV=1	NEB2_RAT	Ppp1r9b	90 kDa	0.03	0	0.390624	0	0.390312	0.0311	0.397703	0.0353	0.431558	0.00397709	0.033465	0.101918
40S ribosomal protein S25 OS=Rattus norvegicus GN=Rps25 PE=2 SV=1	RS25_RAT (+1)	Rps25	14 kDa	0.48	0	0.390128	0	0.389429	0.5126	0.567008	0.4506	0.393915	0.00411776	0.033465	1.63068
Stress-induced-phosphoprotein 1 OS=Rattus norvegicus GN=Stip1 PE=1 SV=1	STIP1_RAT	Stip1	63 kDa	0.3	0	0.389048	0	0.390728	0.2026	0.585295	0.5461	0.475741	0.16111	0.261039	0.402926
Histidine triad nucleotide-binding protein 1 OS=Rattus norvegicus GN=Hint1 PE=1 SV=5	HINT1_RAT	Hint1	14 kDa	-0.16	0	0.394778	0	0.391316	0.0525	0.391316	-0.2714	0.448664	0.568823	0.647933	-0.0694348
Heterogeneous nuclear ribonucleoprotein Q OS=Rattus norvegicus GN=Syncrip PE=2 SV=1	HNRPQ_RAT	Syncrip	60 kDa	0.2	0	0.38973	0	0.390916	0.233	0.405959	0.164	0.407743	0.0289044	0.0880895	0.48588
Long-chain specific acyl-CoA dehydrogenase, mitochondrial OS=Rattus norvegicus GN=Acadl PE=1 SV=1	ACADL_RAT	Acadl	48 kDa	0.65	0	0.396646	0	0.399547	0.5685	0.446488	0.768	0.410004	0.0215636	0.0776862	1.6608
ATPase family AAA domain-containing protein 3 OS=Rattus norvegicus GN=Atad3 PE=1 SV=1	ATAD3_RAT	Atad3	67 kDa	-0.19	0	0.386395	0	0.388872	-0.1624	0.396937	-0.2753	0.386395	0.0605525	0.129179	-0.388846
Redox-regulatory protein FAM213A OS=Rattus norvegicus GN=Fam213a PE=1 SV=1	F213A_RAT	Fam213a	26 kDa	0.09	0	0.389929	0	0.392376	0.1894	0.395666	-0.0101	0.396622	0.463637	0.565871	0.051245
Proteasome subunit alpha type-1 OS=Rattus norvegicus GN=Psma1 PE=1 SV=2	PSA1_RAT (+1)	Psma1	30 kDa	1.05	0	0.388268	0	0.393535	1.3268	1.92598	0.215	0.38836	0.299857	0.408736	0.93942
40S ribosomal protein S10 OS=Rattus norvegicus GN=Rps10 PE=2 SV=1	RS10_RAT	Rps10	19 kDa	0.84	0	0.392153	0	0.393125	0.8848	0.413883	0.6891	0.393175	0.0151111	0.061895	2.33715
40S ribosomal protein S16 OS=Rattus norvegicus GN=Rps16 PE=1 SV=2	RS16_RAT (+5)	Rps16	16 kDa	-1.56	0	0.388317	0	0.387409	-0.9014	1.24123	-2.5201	2.49287	0.168869	0.269348	-2.04633
Neuronal cell adhesion molecule OS=Rattus norvegicus GN=Nrcam PE=1 SV=2	NRCAM_RAT	Nrcam	134 kDa	-0.18	0	0.391646	0	0.389356	-0.0751	0.389356	-0.2415	0.414053	0.197422	0.299581	-0.216967
40S ribosomal protein S8 OS=Rattus norvegicus GN=Rps8 PE=1 SV=2	RS8_RAT	Rps8	24 kDa	0.36	0	0.392659	0	0.392695	0.723	0.398579	0.1518	0.520286	0.265318	0.371156	0.356808
Proteasome subunit beta type-3 OS=Rattus norvegicus GN=Psmb3 PE=1 SV=1	PSB3_RAT	Psmb3	23 kDa	0.42	0	0.387652	0	0.396741	0.4665	0.403284	0.2748	0.387652	0.0608352	0.129243	0.859345
Very long-chain specific acyl-CoA dehydrogenase, mitochondrial OS=Rattus norvegicus GN=Acadvl PE=1 SV=1	ACADV_RAT	Acadvl	71 kDa	-0.18	0	0.387252	0	0.393725	-0.389	0.428221	0.0289	0.387375	0.479673	0.577864	-0.0987149
Phospholipase D3 OS=Rattus norvegicus GN=Pld3 PE=2 SV=1	PLD3_RAT	Pld3	54 kDa	-0.15	0	0.44917	0	0.390183	0.1604	0.390183	-0.5323	0.44917	0.645081	0.708758	-0.0516361
Translocon-associated protein subunit delta OS=Rattus norvegicus GN=Ssr4 PE=2 SV=1	SSRD_RAT	Ssr4	19 kDa	0.12	0	0.395104	0	0.400327	0.1436	0.400327	0.108	0.397507	0.0194388	0.0731814	0.313778
Nicastrin OS=Rattus norvegicus GN=Ncstn PE=1 SV=1	NICA_RAT	Ncstn	78 kDa	0.1	0	0.412315	0	0.38604	0.1311	0.394869	0.0612	0.413675	0.11063	0.201445	0.160224
Enoyl-CoA delta isomerase 1, mitochondrial OS=Rattus norvegicus GN=Eci1 PE=1 SV=1	ECI1_RAT	Eci1	32 kDa	0.36	0	0.390014	0	0.387651	0.3404	0.390396	0.3797	0.394566	0.00296527	0.0316296	1.24332
Cluster of Eukaryotic initiation factor 4A-II OS=Rattus norvegicus GN=Eif4a2 PE=1 SV=1 (IF4A2_RAT)	IF4A2_RAT [4]	Eif4a2	46 kDa	-0.02	0	0.38987	0	0.38604	0.4867	0.38604	-0.1155	0.64606	0.600439	0.671234	-0.00797276
NADH dehydrogenase [ubiquinone] iron-sulfur protein 4, mitochondrial OS=Rattus norvegicus GN=Ndufs4 PE=1 SV=1	NDUS4_RAT (+1)	Ndufs4	20 kDa	-0.48	0	0.395579	0	0.392873	-0.3998	0.531067	-0.6267	0.79567	0.0455475	0.110523	-1.05722
Sorting nexin-3 OS=Rattus norvegicus GN=Snx3 PE=1 SV=1	SNX3_RAT	Snx3	19 kDa	0.74	0	0.387816	0	0.389792	0.7362	0.405121	0.7372	0.526572	4.60637e-07	0.000117923	6.69365
Leucine-rich repeat-containing protein 59 OS=Rattus norvegicus GN=Lrrc59 PE=1 SV=1	LRC59_RAT	Lrrc59	35 kDa	-0.22	0	0.390872	0	0.39853	-0.1559	0.439759	-0.3342	0.390872	0.110788	0.201445	-0.352492
Alpha-N-acetylgalactosaminidase OS=Rattus norvegicus GN=Naga PE=2 SV=1	NAGAB_RAT	Naga	47 kDa	1.18	0	0.391689	0	0.389124	1.4007	0.394216	1.1313	0.463239	0.0111319	0.0531526	3.46281
NADH dehydrogenase [ubiquinone] 1 alpha subcomplex subunit 5 OS=Rattus norvegicus GN=Ndufa5 PE=1 SV=3	NDUA5_RAT	Ndufa5	13 kDa	-0.15	0	0.389862	0	0.387815	-0.0927	0.388525	-0.2081	0.406933	0.121035	0.212955	-0.232001
2-iminobutanoate/2-iminopropanoate deaminase OS=Rattus norvegicus GN=Rida PE=1 SV=3	RIDA_RAT (+3)	Rida	14 kDa	0.49	0	0.392201	0	0.389635	0.6528	0.410577	0.3244	0.417897	0.0968148	0.184272	0.828757
40S ribosomal protein S15a OS=Rattus norvegicus GN=Rps15a PE=1 SV=2	RS15A_RAT	Rps15a	15 kDa	0.51	0	0.393801	0	0.392428	0.7831	0.577954	0.303	0.438478	0.152055	0.250328	0.706341
Dynein light chain 2, cytoplasmic OS=Rattus norvegicus GN=Dynll2 PE=1 SV=1	DYL2_RAT (+1)	Dynll2	10 kDa	0.14	0	0.389911	0	0.38917	0.0919	0.481015	0.1975	0.437831	0.111346	0.201445	0.224313
Cystatin-C OS=Rattus norvegicus GN=Cst3 PE=1 SV=2	CYTC_RAT	Cst3	15 kDa	0.12	0	0.390914	0	0.392023	0.2777	0.402829	-0.0293	0.391141	0.503399	0.598341	0.0616314
60S acidic ribosomal protein P1 OS=Rattus norvegicus GN=Rplp1 PE=3 SV=1	RLA1_RAT	Rplp1	11 kDa	0.53	0	0.394425	0	0.398726	0.7118	0.398726	0.4265	0.431986	0.0574581	0.127633	1.09106
Valine--tRNA ligase OS=Rattus norvegicus GN=Vars PE=2 SV=2	SYVC_RAT	Vars	140 kDa	-0.05	0	0.397695	0	0.390651	-0.1256	0.403991	0.1095	0.397695	0.951633	0.964824	-0.00179048
40S ribosomal protein S26 OS=Rattus norvegicus GN=Rps26 PE=3 SV=3	RS26_RAT (+5)	Rps26	13 kDa	0.47	0	0.387652	0	0.389143	0.5904	0.389968	0.2398	0.387652	0.141461	0.239036	0.672636
Cluster of 60S ribosomal protein L19 OS=Rattus norvegicus GN=Rpl19 PE=1 SV=1 (RL19_RAT)	RL19_RAT [2]	Rpl19	23 kDa	0.79	0	0.387539	0	0.392017	0.8107	0.392017	0.7759	0.584197	0.00048074	0.0144844	3.3454
Far upstream element-binding protein 2 OS=Rattus norvegicus GN=Khsrp PE=1 SV=1	FUBP2_RAT	Khsrp	74 kDa	1.03	0	0.389316	0	0.39035	0.9633	0.410148	1.1059	0.457421	0.00471578	0.0341073	3.47959
Proteasome subunit beta type-5 OS=Rattus norvegicus GN=Psmb5 PE=1 SV=3	PSB5_RAT	Psmb5	29 kDa	0.23	0	0.395382	0	0.387649	0.1637	0.388557	0.2616	0.46096	0.0491166	0.115477	0.496496
40S ribosomal protein S14 OS=Rattus norvegicus GN=Rps14 PE=2 SV=3	RS14_RAT	Rps14	16 kDa	0.43	0	0.388507	0	0.387894	0.5984	0.408563	0.3074	0.394877	0.0895612	0.175691	0.747783
Hydroxyacyl-coenzyme A dehydrogenase, mitochondrial OS=Rattus norvegicus GN=Hadh PE=2 SV=1	HCDH_RAT	Hadh	34 kDa	0.3	0	0.391862	0	0.391798	0.1412	0.500091	0.5166	0.3995	0.221825	0.325428	0.336784
Isocitrate dehydrogenase [NAD] subunit gamma 1, mitochondrial OS=Rattus norvegicus GN=Idh3g PE=1 SV=2	IDHG1_RAT	Idh3g	43 kDa	-0.53	0	0.390454	0	0.390309	-0.4937	0.401197	-0.6271	0.390454	0.0138722	0.0586988	-1.50273
Rho-related GTP-binding protein RhoB OS=Rattus norvegicus GN=Rhob PE=1 SV=1	RHOB_RAT	Rhob	22 kDa	-0.41	0	0.408023	0	0.417657	-0.3966	0.428779	-0.415	0.411686	0.00051359	0.0146088	-1.73271
MARCKS-related protein OS=Rattus norvegicus GN=Marcksl1 PE=2 SV=3	MRP_RAT	Marcksl1	20 kDa	0.08	0	0.391626	0	0.388334	0.062	0.389392	0.0971	0.417536	0.0453837	0.110523	0.176203
Protein kinase C alpha type OS=Rattus norvegicus GN=Prkca PE=1 SV=3	KPCA_RAT	Prkca	77 kDa	-0.04	0	0.389757	0	0.39058	0.1531	0.828176	-0.231	0.524964	0.858043	0.898401	-0.00428557
Glycine--tRNA ligase (Fragment) OS=Rattus norvegicus GN=Gars PE=1 SV=1	GARS_RAT	Gars	72 kDa	-0.21	0	0.403938	0	0.391293	-0.1748	0.395317	-0.2535	0.40481	0.0321448	0.0935122	-0.497629
60S ribosomal protein L18a OS=Rattus norvegicus GN=Rpl18a PE=2 SV=1	RL18A_RAT	Rpl18a	21 kDa	0.37	0	0.416363	0	0.38604	0.6234	0.38604	0.2251	0.431623	0.16687	0.268672	0.486278
Cluster of 40S ribosomal protein S3a OS=Rattus norvegicus GN=Rps3a PE=1 SV=2 (RS3A_RAT)	RS3A_RAT [2]	Rps3a	30 kDa	0.41	0	0.39126	0	0.394093	0.4775	0.395693	0.3709	0.396884	0.0154232	0.0621054	1.13936
Cluster of 40S ribosomal protein S5 isoform 1 [Rattus norvegicus] (gi|471009907)	gi|471009907 [2]		?	0.47	0	0.398127	0	0.392993	0.5735	0.392993	0.4357	0.409035	0.0181385	0.0703554	1.24747
Ubiquitin thioesterase OTUB1 OS=Rattus norvegicus GN=Otub1 PE=1 SV=1	OTUB1_RAT	Otub1	31 kDa	0.04	0	0.388543	0	0.390349	-0.0654	0.390364	0.1128	1.58546	0.815155	0.857001	0.00617264
60S ribosomal protein L35 OS=Rattus norvegicus GN=Rpl35 PE=1 SV=3	RL35_RAT (+1)	Rpl35	15 kDa	1.96	0	0.407587	0	0.394316	2.3921	2.04551	0.509	0.407587	0.263322	0.370387	1.94668
Dipeptidyl peptidase 3 OS=Rattus norvegicus GN=Dpp3 PE=1 SV=2	DPP3_RAT	Dpp3	83 kDa	-0.18	0	0.394791	0	0.471232	-0.3645	0.471232	-0.1305	0.421185	0.168668	0.269348	-0.236115
Cluster of 60S ribosomal protein L6 OS=Rattus norvegicus GN=Rpl6 PE=1 SV=5 (RL6_RAT)	RL6_RAT [2]	Rpl6	34 kDa	0.54	0	0.389378	0	0.39339	0.7677	0.396661	0.215	0.391398	0.217377	0.32074	0.614047
Destrin OS=Rattus norvegicus GN=Dstn PE=1 SV=3	DEST_RAT	Dstn	19 kDa	0.11	0	0.386395	0	0.389573	0.1169	0.389573	0.1012	0.386395	0.00514195	0.0346524	0.369863
Dynein light chain Tctex-type 1 OS=Rattus norvegicus GN=Dynlt1 PE=1 SV=1	DYLT1_RAT (+2)	Dynlt1	12 kDa	0.23	0	0.389635	0	0.392126	0.2155	0.409494	0.242	0.399325	0.00333834	0.0321593	0.790523
Oligoribonuclease, mitochondrial OS=Rattus norvegicus GN=Rexo2 PE=2 SV=1	ORN_RAT	Rexo2	27 kDa	-0.81	0	0.390578	0	0.38978	0.0011	0.38978	-1.2153	1.06039	0.423346	0.533875	-0.50835
Coactosin-like protein OS=Rattus norvegicus GN=Cotl1 PE=1 SV=1	COTL1_RAT	Cotl1	16 kDa	0.11	0	0.39103	0	0.39751	0.3845	0.397533	-0.0123	0.677718	0.447262	0.553135	0.0651368
Glutaminase kidney isoform, mitochondrial OS=Rattus norvegicus GN=Gls PE=1 SV=2	GLSK_RAT	Gls	74 kDa	-0.44	0	0.386395	0	0.390745	-0.359	0.790299	-0.8473	0.386395	0.132143	0.229347	-0.647908
Rabphilin-3A OS=Rattus norvegicus GN=Rph3a PE=1 SV=1	RP3A_RAT	Rph3a	76 kDa	-0.67	0	0.39295	0	0.395817	-1.1891	0.395817	-0.4109	0.747606	0.176088	0.277906	-0.857916
Stomatin-like protein 2, mitochondrial OS=Rattus norvegicus GN=Stoml2 PE=1 SV=1	STML2_RAT	Stoml2	38 kDa	0.04	0	0.391866	0	0.394848	0.0368	0.394848	0.0416	0.394269	0.00372749	0.033465	0.13589
Exportin-1 OS=Rattus norvegicus GN=Xpo1 PE=1 SV=1	XPO1_RAT	Xpo1	123 kDa	0.19	0	0.39806	0	0.397891	0.05	0.397976	0.3379	0.398468	0.310218	0.417978	0.165742
Ragulator complex protein LAMTOR1 OS=Rattus norvegicus GN=Lamtor1 PE=1 SV=1	LTOR1_RAT	Lamtor1	18 kDa	0.1	0	0.39434	0	0.389975	0.407	0.609984	-0.0496	0.397336	0.515744	0.604209	0.0503835
40S ribosomal protein S20 OS=Rattus norvegicus GN=Rps20 PE=3 SV=1	RS20_RAT	Rps20	13 kDa	0.46	0	0.392799	0	0.388107	0.4892	0.38811	0.4414	0.392848	0.00262794	0.0289318	1.6297
40S ribosomal protein S27 OS=Rattus norvegicus GN=Rps27 PE=1 SV=3	RS27_RAT	Rps27	9 kDa	0.01	0	0.391714	0	0.38978	0.3286	0.38978	-0.1548	0.398487	0.753607	0.807211	0.0021417
40S ribosomal protein S29 OS=Rattus norvegicus GN=Rps29 PE=1 SV=2	RS29_RAT (+1)	Rps29	7 kDa	0.48	0	0.389066	0	0.388751	0.5021	0.505184	0.4664	0.39249	0.00135598	0.0210382	1.85348
Ras-related protein Rab-18 OS=Rattus norvegicus GN=Rab18 PE=2 SV=1	RAB18_RAT	Rab18	23 kDa	0	0	0.389088	0	0.393312	0.0626	0.393974	-0.0502	0.469643	0.922502	0.946535	0
60S ribosomal protein L13 OS=Rattus norvegicus GN=Rpl13 PE=1 SV=2	RL13_RAT	Rpl13	24 kDa	0.51	0	0.389356	0	0.392621	0.4469	0.395428	0.6422	0.389356	0.0306842	0.0908109	1.22348
Kinesin light chain 1 OS=Rattus norvegicus GN=Klc1 PE=1 SV=2	KLC1_RAT	Klc1	64 kDa	-0.34	0	0.387652	0	0.392809	-0.2975	0.430032	-0.4314	0.387652	0.0321287	0.0935122	-0.805686
Gamma-enolase OS=Rattus norvegicus GN=Eno2 PE=1 SV=2	ENOG_RAT	Eno2	47 kDa	-0.27	0	0.393431	0	0.393349	-0.2921	0.463667	-0.2548	0.456333	0.00461939	0.0341073	-0.912126
Cluster of proteasome subunit beta type-4 [Rattus norvegicus] (gi|817476911)	gi|817476911 [2]		?	0.33	0	0.388126	0	0.386843	0.3413	0.39521	0.3235	0.407223	0.000716129	0.0146501	1.39369
Proteasome subunit beta type-6 OS=Rattus norvegicus GN=Psmb6 PE=1 SV=3	PSB6_RAT	Psmb6	25 kDa	0.51	0	0.3983	0	0.389167	0.8242	1.60544	-0.0087	0.402855	0.430775	0.539259	0.314956
Cluster of Cytochrome b5 OS=Rattus norvegicus GN=Cyb5a PE=1 SV=2 (CYB5_RAT)	CYB5_RAT [2]	Cyb5a	15 kDa	-1.1	0	0.390154	0	0.398182	-3.4412	0.398182	-0.4969	1.12925	0.312864	0.419336	-0.95599
Saccharopine dehydrogenase-like oxidoreductase OS=Rattus norvegicus GN=Sccpdh PE=1 SV=1	SCPDL_RAT	Sccpdh	47 kDa	0.2	0	0.394286	0	0.388087	0.2186	0.388087	0.1995	0.400085	0.00208041	0.0275194	0.718573
Wiskott-Aldrich syndrome protein family member 1 OS=Rattus norvegicus GN=Wasf1 PE=1 SV=1	WASF1_RAT	Wasf1	62 kDa	-1.11	0	0.387059	0	0.387816	-1.2974	0.409651	-0.9191	0.388295	0.0279158	0.0880895	-2.69664
Actin-related protein 2/3 complex subunit 2 OS=Rattus norvegicus GN=Arpc2 PE=1 SV=1	ARPC2_RAT	Arpc2	34 kDa	-0.96	0	0.390719	0	0.387892	-1.114	1.11437	-0.8092	0.888151	0.0242094	0.0820874	-2.39997
Cluster of Calbindin OS=Rattus norvegicus GN=Calb1 PE=1 SV=2 (CALB1_RAT)	CALB1_RAT [5]	Calb1	30 kDa	0.42	0	0.38604	0	0.389356	0.5695	0.389356	0.2656	0.38604	0.110842	0.201445	0.672939
GrpE protein homolog 1, mitochondrial OS=Rattus norvegicus GN=Grpel1 PE=1 SV=2	GRPE1_RAT	Grpel1	24 kDa	-0.1	0	0.387652	0	0.390956	-0.1648	0.3981	0.0203	0.387652	0.516731	0.604209	-0.0503835
60S ribosomal protein L8 OS=Rattus norvegicus GN=Rpl8 PE=2 SV=2	RL8_RAT	Rpl8	28 kDa	0.32	0	0.387652	0	0.387238	0.4423	0.420169	0.0708	0.388353	0.301304	0.408736	0.2863
Alcohol dehydrogenase [NADP(+)] OS=Rattus norvegicus GN=Akr1a1 PE=1 SV=2	AK1A1_RAT	Akr1a1	37 kDa	-0.07	0	0.388087	0	0.401545	-0.1238	0.54958	0.0638	0.388087	0.779417	0.827928	-0.013218
Glutamine synthetase OS=Rattus norvegicus GN=Glul PE=1 SV=3	GLNA_RAT	Glul	42 kDa	0.71	0	0.392993	0	0.390684	0.7116	0.444017	0.6838	0.392993	0.000396674	0.0144844	3.00662
Lactoylglutathione lyase OS=Rattus norvegicus GN=Glo1 PE=1 SV=3	LGUL_RAT	Glo1	21 kDa	0.52	0	0.389098	0	0.392017	0.8595	0.392017	0.3519	0.419332	0.139705	0.237637	0.747245
Pleiotrophin OS=Rattus norvegicus GN=Ptn PE=1 SV=1	PTN_RAT (+3)	Ptn	19 kDa	2.31	0	0.391019	0	0.396487	2.4474	0.431698	2.1728	0.42122	0.00351387	0.0321593	7.9396
Coxsackievirus and adenovirus receptor homolog OS=Rattus norvegicus GN=Cxadr PE=1 SV=2	CXAR_RAT	Cxadr	40 kDa	-0.63	0	0.389927	0	0.400327	-0.5278	0.400327	-0.654	0.390873	0.0112119	0.0531526	-1.84879
Ras-related protein Rap-2b OS=Rattus norvegicus GN=Rap2b PE=2 SV=1	RAP2B_RAT	Rap2b	21 kDa	-0.41	0	0.392697	0	0.390454	-0.4737	0.390454	-0.3893	0.393778	0.00942945	0.0487665	-1.23849
Acid ceramidase OS=Rattus norvegicus GN=Asah1 PE=2 SV=1	ASAH1_RAT	Asah1	44 kDa	0.43	0	0.397732	0	0.390802	0.471	0.411117	0.3781	0.418656	0.0117598	0.0547365	1.24925
Dolichyl-diphosphooligosaccharide--protein glycosyltransferase 48 kDa subunit OS=Rattus norvegicus GN=Ddost PE=2 SV=1	OST48_RAT	Ddost	49 kDa	-0.13	0	0.390183	0	0.394951	-0.0048	0.465963	-0.2549	0.390185	0.408157	0.518551	-0.0853731
Delta(3,5)-Delta(2,4)-dienoyl-CoA isomerase, mitochondrial OS=Rattus norvegicus GN=Ech1 PE=1 SV=2	ECH1_RAT	Ech1	36 kDa	0.53	0	0.391734	0	0.387711	0.7072	0.612487	0.439	0.392542	0.0506295	0.117829	1.13342
Glia maturation factor beta OS=Rattus norvegicus GN=Gmfb PE=1 SV=2	GMFB_RAT	Gmfb	17 kDa	0	0	0.415725	0	0.400327	-0.0046	0.400327	0.0052	0.416153	0.956748	0.968093	0
Proteasome subunit beta type-2 OS=Rattus norvegicus GN=Psmb2 PE=1 SV=1	PSB2_RAT	Psmb2	23 kDa	0.2	0	0.387928	0	0.39156	0.2347	0.39156	0.1769	0.395969	0.0191551	0.0726476	0.524427
Neuron-specific calcium-binding protein hippocalcin OS=Rattus norvegicus GN=Hpca PE=1 SV=2	HPCA_RAT	Hpca	22 kDa	-0.63	0	0.397776	0	0.387652	-0.6484	0.387652	-0.618	0.412208	0.000575745	0.0146501	-2.66068
3-hydroxyisobutyrate dehydrogenase, mitochondrial OS=Rattus norvegicus GN=Hibadh PE=1 SV=3	3HIDH_RAT	Hibadh	35 kDa	-0.13	0	0.389569	0	0.400612	-0.2216	0.410251	-0.0406	0.406606	0.284447	0.392552	-0.121561
Synaptophysin OS=Rattus norvegicus GN=Syp PE=1 SV=1	SYPH_RAT (+2)	Syp	33 kDa	-1.28	0	0.38978	0	0.38986	-1.2311	0.47615	-1.3799	0.38978	0.00323208	0.0321593	-4.39943
Transmembrane emp24 domain-containing protein 9 OS=Rattus norvegicus GN=Tmed9 PE=1 SV=1	TMED9_RAT	Tmed9	27 kDa	-0.43	0	0.392993	0	0.392484	-0.7556	1.04981	0.217	0.392993	0.635381	0.704687	-0.1505
Neuronal migration protein doublecortin OS=Rattus norvegicus GN=Dcx PE=1 SV=2	DCX_RAT	Dcx	41 kDa	-0.46	0	0.404477	0	0.425106	-0.1316	0.451069	-0.6142	0.507566	0.262279	0.369937	-0.457435
Elongin-C OS=Rattus norvegicus GN=Eloc PE=1 SV=1	ELOC_RAT (+1)	Eloc	12 kDa	0.13	0	0.394848	0	0.40154	0.1727	0.403718	0.0454	0.394848	0.228795	0.332793	0.143031
Large neutral amino acids transporter small subunit 1 OS=Rattus norvegicus GN=Slc7a5 PE=1 SV=2	LAT1_RAT	Slc7a5	56 kDa	-0.08	0	0.388982	0	0.388718	0.0199	0.476053	-0.2864	0.388982	0.476	0.576151	-0.0441108
V-type proton ATPase subunit F OS=Rattus norvegicus GN=Atp6v1f PE=1 SV=1	VATF_RAT	Atp6v1f	13 kDa	-0.24	0	0.389677	0	0.389356	-0.2101	0.389356	-0.2541	0.423861	0.00886523	0.0472812	-0.732394
Thioredoxin-related transmembrane protein 2 OS=Rattus norvegicus GN=Tmx2 PE=2 SV=1	TMX2_RAT (+1)	Tmx2	34 kDa	-0.25	0	0.400327	0	0.391016	-0.196	0.427274	-0.3611	0.400327	0.0777254	0.156503	-0.463669
Cluster of Proteasome subunit alpha type-6 OS=Rattus norvegicus GN=Psma6 PE=1 SV=1 (PSA6_RAT)	PSA6_RAT [3]	Psma6	27 kDa	0.28	0	0.388445	0	0.390994	0.4	0.398718	0.1584	0.389377	0.14701	0.244381	0.394528
60S ribosomal protein L22 OS=Rattus norvegicus GN=Rpl22 PE=2 SV=2	RL22_RAT	Rpl22	15 kDa	0.52	0	0.399976	0	0.389118	0.6251	0.389865	0.4133	0.400808	0.0391744	0.101992	1.18709
Glutathione S-transferase kappa 1 OS=Rattus norvegicus GN=Gstk1 PE=1 SV=3	GSTK1_RAT	Gstk1	25 kDa	0.38	0	0.388087	0	0.439531	0.4173	0.445064	0.3048	0.388087	0.0234228	0.07995	0.960015
Transmembrane glycoprotein NMB OS=Rattus norvegicus GN=Gpnmb PE=2 SV=1	GPNMB_RAT	Gpnmb	64 kDa	0.18	0	0.386395	0	0.390921	0.2135	0.395913	0.1048	0.386395	0.0995181	0.188019	0.300818
40S ribosomal protein S28 OS=Rattus norvegicus GN=Rps28 PE=1 SV=1	RS28_RAT (+1)	Rps28	8 kDa	0.92	0	0.390872	0	0.388334	1.0276	0.394661	0.6964	0.390872	0.0349817	0.0971861	2.14464
Synaptogyrin-1 OS=Rattus norvegicus GN=Syngr1 PE=2 SV=1	SNG1_RAT (+4)	Syngr1	26 kDa	-0.79	0	0.388723	0	0.39033	-0.6716	0.395789	-1.0232	0.42804	0.0404457	0.103541	-1.79155
OX-2 membrane glycoprotein OS=Rattus norvegicus GN=Cd200 PE=2 SV=1	OX2G_RAT	Cd200	31 kDa	-0.29	0	0.402324	0	0.394848	-0.2713	0.394848	-0.2945	0.509336	0.00167709	0.023852	-1.08341
Translocon-associated protein subunit alpha OS=Rattus norvegicus GN=Ssr1 PE=1 SV=1	SSRA_RAT	Ssr1	36 kDa	0.17	0	0.392523	0	0.39751	0.3407	0.39889	0.0106	0.393661	0.398712	0.509079	0.114776
ATP synthase subunit epsilon, mitochondrial OS=Rattus norvegicus GN=Atp5e PE=1 SV=2	ATP5E_RAT (+2)	Atp5e	6 kDa	-0.09	0	0.38978	0	0.390014	-0.043	0.391667	-0.1924	0.38978	0.2558	0.361795	-0.091501
Cluster of Golgi apparatus protein 1 OS=Rattus norvegicus GN=Glg1 PE=1 SV=1 (GSLG1_RAT)	GSLG1_RAT [2]	Glg1	134 kDa	0.22	0	0.40241	0	0.38978	0.0497	0.38978	0.3117	0.409476	0.301762	0.408736	0.196831
Heme oxygenase 1 OS=Rattus norvegicus GN=Hmox1 PE=1 SV=1	HMOX1_RAT (+4)	Hmox1	33 kDa	0.79	0	0.389356	0	0.391906	0.6715	0.632008	1.1372	0.389356	0.0603552	0.129179	1.61678
Transaldolase OS=Rattus norvegicus GN=Taldo1 PE=1 SV=2	TALDO_RAT	Taldo1	37 kDa	0.66	0	0.394848	0	0.392859	0.7478	0.649807	0.4827	0.394848	0.0434145	0.107904	1.4695
Cytoplasmic aconitate hydratase OS=Rattus norvegicus GN=Aco1 PE=1 SV=1	ACOC_RAT	Aco1	98 kDa	-1.3	0	0.39116	0	0.391141	-2.4056	1.93756	-0.1394	0.395974	0.378127	0.484682	-0.94154
60S ribosomal protein L17 OS=Rattus norvegicus GN=Rpl17 PE=2 SV=3	RL17_RAT	Rpl17	21 kDa	0.38	0	0.425575	0	0.390183	0.7249	0.390183	0.1879	0.441921	0.231268	0.334489	0.416157
Cluster of Voltage-dependent calcium channel subunit alpha-2/delta-1 OS=Rattus norvegicus GN=Cacna2d1 PE=1 SV=1 (CA2D1_RAT)	CA2D1_RAT [5]	Cacna2d1	124 kDa	-0.34	0	0.394848	0	0.389573	-0.4888	0.389573	-0.1734	0.394848	0.170605	0.271272	-0.443575
60S ribosomal protein L9 OS=Rattus norvegicus GN=Rpl9 PE=1 SV=1	RL9_RAT	Rpl9	22 kDa	0.32	0	0.388126	0	0.38787	0.3885	0.430808	0.1939	0.388126	0.0958615	0.183743	0.542149
Annexin A1 OS=Rattus norvegicus GN=Anxa1 PE=1 SV=2	ANXA1_RAT	Anxa1	39 kDa	1.45	0	0.390454	0	0.393327	1.4216	0.401019	1.4996	0.390454	0.000712201	0.0146501	6.12379
Acylpyruvase FAHD1, mitochondrial OS=Rattus norvegicus GN=Fahd1 PE=1 SV=1	FAHD1_RAT	Fahd1	24 kDa	-0.55	0	0.390183	0	0.386843	-0.5035	0.424307	-0.6578	0.390183	0.0171998	0.0677409	-1.48064
UMP-CMP kinase OS=Rattus norvegicus GN=Cmpk1 PE=1 SV=2	KCY_RAT	Cmpk1	22 kDa	0	0	0.395143	0	0.391903	-0.0912	0.447574	0.0973	0.397916	0.977123	0.980955	0
60S ribosomal protein L24 OS=Rattus norvegicus GN=Rpl24 PE=2 SV=1	RL24_RAT (+1)	Rpl24	18 kDa	0.5	0	0.388087	0	0.39173	0.59	0.426386	0.3014	0.388087	0.0907744	0.177391	0.864699
60S ribosomal protein L30 OS=Rattus norvegicus GN=Rpl30 PE=3 SV=2	RL30_RAT	Rpl30	13 kDa	1.3	0	0.39531	0	0.391316	1.6469	0.391316	1.1105	0.748428	0.0358214	0.097556	3.02553
S-phase kinase-associated protein 1 OS=Rattus norvegicus GN=Skp1 PE=1 SV=3	SKP1_RAT	Skp1	19 kDa	0.51	0	0.390319	0	0.390394	0.691	0.391136	0.3207	0.504918	0.111922	0.201775	0.816307
Neuronal calcium sensor 1 OS=Rattus norvegicus GN=Ncs1 PE=1 SV=2	NCS1_RAT	Ncs1	22 kDa	-0.28	0	0.402942	0	0.394037	-0.2915	0.396476	-0.2437	0.402942	0.00788252	0.0429346	-0.881462
40S ribosomal protein S30 OS=Rattus norvegicus GN=Fau PE=1 SV=1	RS30_RAT	Fau	7 kDa	1.02	0	0.387652	0	0.400045	1.2454	0.423928	0.5964	0.387652	0.104976	0.194035	1.67251
Integrin beta-1 OS=Rattus norvegicus GN=Itgb1 PE=2 SV=1	ITB1_RAT	Itgb1	88 kDa	0.4	0	0.394495	0	0.388496	0.5146	0.389798	0.2707	0.440941	0.084425	0.167541	0.714611
Dynein light chain roadblock-type 1 OS=Rattus norvegicus GN=Dynlrb1 PE=1 SV=3	DLRB1_RAT	Dynlrb1	11 kDa	0.16	0	0.397587	0	0.390666	0.2715	0.41809	0.0395	0.398079	0.312056	0.419336	0.139053
Elongation factor 1-gamma OS=Rattus norvegicus GN=Eef1g PE=2 SV=3	EF1G_RAT (+1)	Eef1g	50 kDa	1.07	0	0.392993	0	0.392486	1.3635	0.94728	0.4983	0.392993	0.164317	0.265395	1.41939
Inositol monophosphatase 1 OS=Rattus norvegicus GN=Impa1 PE=1 SV=2	IMPA1_RAT	Impa1	31 kDa	-0.38	0	0.387652	0	0.389755	-0.4067	0.516587	-0.3411	0.387652	0.00760779	0.0429346	-1.19627
Programmed cell death protein 6 OS=Rattus norvegicus GN=Pdcd6 PE=2 SV=1	PDCD6_RAT	Pdcd6	22 kDa	0.43	0	0.390605	0	0.401707	0.4304	0.402951	0.4268	0.453575	1.76372e-05	0.00225756	2.62019
Proteasome subunit alpha type-4 OS=Rattus norvegicus GN=Psma4 PE=1 SV=1	PSA4_RAT (+3)	Psma4	29 kDa	0.12	0	0.425832	0	0.388126	0.258	0.392719	-0.2064	0.425832	0.921674	0.946535	0.00659364
Mitochondrial import inner membrane translocase subunit Tim8 A OS=Rattus norvegicus GN=Timm8a PE=1 SV=1	TIM8A_RAT (+1)	Timm8a	11 kDa	0.41	0	0.394681	0	0.396309	0.4531	0.470781	0.36	0.482666	0.012858	0.0565951	1.17745
Cluster of Small ubiquitin-related modifier 2 OS=Rattus norvegicus GN=Sumo2 PE=1 SV=1 (SUMO2_RAT)	SUMO2_RAT [4]	Sumo2	11 kDa	1.09	0	0.388739	0	0.392993	1.1828	0.392993	1.0409	0.39141	0.00404734	0.033465	3.70301
Membrane-associated progesterone receptor component 2 OS=Rattus norvegicus GN=Pgrmc2 PE=1 SV=1	PGRC2_RAT	Pgrmc2	23 kDa	-0.12	0	0.401509	0	0.387652	-0.0524	0.387652	-0.1597	0.401651	0.186711	0.289414	-0.148788
Mitochondrial import inner membrane translocase subunit Tim9 OS=Rattus norvegicus GN=Timm9 PE=1 SV=3	TIM9_RAT	Timm9	10 kDa	-0.26	0	0.395817	0	0.395333	-0.2074	0.399251	-0.3676	0.395817	0.0696147	0.142571	-0.506458
Phosphofurin acidic cluster sorting protein 1 OS=Rattus norvegicus GN=Pacs1 PE=1 SV=1	PACS1_RAT	Pacs1	105 kDa	-0.54	0	0.425832	0	0.394037	-0.6122	0.455192	-0.3785	0.425832	0.0513938	0.119066	-1.14916
T-cell immunomodulatory protein OS=Rattus norvegicus GN=Itfg1 PE=2 SV=1	TIP_RAT	Itfg1	67 kDa	0.26	0	0.390519	0	0.392434	0.3072	0.521148	0.2219	0.811864	0.0250197	0.0842768	0.643149
Nucleolar protein 58 OS=Rattus norvegicus GN=Nop58 PE=1 SV=1	NOP58_RAT	Nop58	60 kDa	-0.1	0	0.388087	0	0.390011	-0.0896	0.403775	-0.1341	0.388087	0.037368	0.10017	-0.230089
Neuronal-specific septin-3 OS=Rattus norvegicus GN=Sept3 PE=1 SV=2	SEPT3_RAT	Sept3	41 kDa	-2.45	0	0.397695	0	0.495149	-3.6623	4.19455	-0.295	0.397695	0.360874	0.467397	-1.86341
Stathmin-2 OS=Rattus norvegicus GN=Stmn2 PE=1 SV=2	STMN2_RAT	Stmn2	21 kDa	-0.02	0	0.425832	0	0.388126	0.0688	0.388126	-0.1187	0.425832	0.815061	0.857001	-0.00308632
Cluster of proteasome activator complex subunit 1 [Rattus norvegicus] (gi|61098214)	gi|61098214 [2]		?	0.67	0	0.386395	0	0.389356	0.7929	0.389356	0.5363	0.386395	0.0353059	0.0971861	1.56186
Basigin OS=Rattus norvegicus GN=Bsg PE=1 SV=2	BASI_RAT	Bsg	42 kDa	0.09	0	0.387868	0	0.412615	0.4288	0.412615	-0.0519	0.391948	0.515118	0.604209	0.0453451
Neuronal growth regulator 1 OS=Rattus norvegicus GN=Negr1 PE=1 SV=1	NEGR1_RAT (+3)	Negr1	38 kDa	-0.32	0	0.400327	0	0.394304	-0.2887	0.396034	-0.3816	0.400327	0.0186722	0.0713444	-0.844876
40S ribosomal protein S21 OS=Rattus norvegicus GN=Rps21 PE=1 SV=1	RS21_RAT (+3)	Rps21	9 kDa	0.75	0	0.386395	0	0.387336	0.7721	0.38986	0.7179	0.386395	0.00132058	0.0210382	2.89606
Vesicle-associated membrane protein-associated protein B OS=Rattus norvegicus GN=Vapb PE=1 SV=3	VAPB_RAT	Vapb	27 kDa	0.1	0	0.390454	0	0.393877	0.1266	0.398043	0.0543	0.390454	0.129437	0.226183	0.148641
Septin-2 OS=Rattus norvegicus GN=Sept2 PE=1 SV=1	SEPT2_RAT	Sept2	42 kDa	0.71	0	0.387652	0	0.390454	0.6784	0.407453	0.7802	0.387652	0.00483575	0.0341073	2.39855
Trafficking protein particle complex subunit 3 OS=Rattus norvegicus GN=Trappc3 PE=2 SV=1	TPPC3_RAT	Trappc3	20 kDa	0.05	0	0.405199	0	0.386395	0.1603	0.386395	-0.0114	0.414686	0.477248	0.576299	0.0275564
Heterogeneous nuclear ribonucleoprotein F OS=Rattus norvegicus GN=Hnrnpf PE=1 SV=3	HNRPF_RAT	Hnrnpf	46 kDa	0.52	0	0.392017	0	0.394848	0.3894	0.394848	0.642	0.392017	0.0550726	0.124766	1.08228
Cluster of 60S ribosomal protein L14 OS=Rattus norvegicus GN=Rpl14 PE=1 SV=3 (RL14_RAT)	RL14_RAT [2]	Rpl14	23 kDa	0.38	0	0.390183	0	0.415853	0.3799	0.415853	0.3861	0.390183	6.55063e-05	0.00479132	2.02956
