# Supplementary material for: CB1-receptor-mediated inhibitory LTD triggers presynaptic remodeling via protein synthesis and ubiquitination
Source: eLife journal article supplement (doi:10.7554/elife.54812), 2020-09-09
Supplement: supp [file elife-54812-supp-v1.zip › elife_poa_e54812_Supplementary_file_2.xlsx]

## Sheet: GSEA_positive_enrichment
NAME	SIZE	ES	NES	NOM p-val	FDR q-val	FWER p-val	RANK AT MAX	LEADING EDGE
GO_RNA_PROCESSING	55	0.66782856	2.3717937	0.0	0.0	0.0	76	tags=60%, list=19%, signal=64%
GO_MACROMOLECULE_CATABOLIC_PROCESS	63	0.64731133	2.3715723	0.0	0.0	0.0	117	tags=75%, list=30%, signal=89%
GO_MRNA_METABOLIC_PROCESS	53	0.6702661	2.3558295	0.0	0.0	0.0	76	tags=62%, list=19%, signal=67%
GO_TRANSLATIONAL_INITIATION	42	0.68510014	2.3246667	0.0	0.0	0.0	76	tags=74%, list=19%, signal=82%
GO_RIBONUCLEOPROTEIN_COMPLEX	70	0.62173206	2.3115823	0.0	0.0	0.0	78	tags=56%, list=20%, signal=57%
GO_ESTABLISHMENT_OF_PROTEIN_LOCALIZATION_TO_ORGANELLE	51	0.6543906	2.2902308	0.0	0.0	0.0	94	tags=69%, list=24%, signal=79%
GO_PROTEIN_LOCALIZATION_TO_ORGANELLE	54	0.6450945	2.2813478	0.0	0.0	0.0	94	tags=65%, list=24%, signal=74%
GO_RNA_CATABOLIC_PROCESS	42	0.67029536	2.2798722	0.0	0.0	0.0	76	tags=71%, list=19%, signal=79%
GO_ESTABLISHMENT_OF_PROTEIN_LOCALIZATION_TO_ENDOPLASMIC_RETICULUM	39	0.6768963	2.265229	0.0	0.0	0.0	76	tags=74%, list=19%, signal=83%
GO_RIBONUCLEOPROTEIN_COMPLEX_BIOGENESIS	46	0.66076976	2.2651565	0.0	0.0	0.0	94	tags=74%, list=24%, signal=86%
GO_PROTEIN_TARGETING_TO_MEMBRANE	41	0.67703426	2.2623773	0.0	0.0	0.0	76	tags=73%, list=19%, signal=81%
GO_NCRNA_PROCESSING	41	0.66975564	2.2560384	0.0	0.0	0.0	76	tags=71%, list=19%, signal=79%
GO_MULTI_ORGANISM_METABOLIC_PROCESS	40	0.68505275	2.2525897	0.0	0.0	0.0	76	tags=75%, list=19%, signal=84%
GO_ORGANIC_CYCLIC_COMPOUND_CATABOLIC_PROCESS	48	0.64399177	2.240325	0.0	0.0	0.0	76	tags=65%, list=19%, signal=70%
GO_RRNA_METABOLIC_PROCESS	39	0.6768961	2.2384183	0.0	0.0	0.0	76	tags=74%, list=19%, signal=83%
GO_RIBOSOME_BIOGENESIS	43	0.6501022	2.2239277	0.0	0.0	0.0	94	tags=74%, list=24%, signal=87%
GO_PROTEIN_LOCALIZATION_TO_ENDOPLASMIC_RETICULUM	40	0.67437553	2.2237158	0.0	0.0	0.0	76	tags=73%, list=19%, signal=81%
GO_CYTOSOLIC_RIBOSOME	40	0.6618261	2.2219634	0.0	0.0	0.0	76	tags=73%, list=19%, signal=81%
GO_NUCLEAR_TRANSCRIBED_MRNA_CATABOLIC_PROCESS_NONSENSE_MEDIATED_DECAY	40	0.67014897	2.2099304	0.0	0.0	0.0	76	tags=73%, list=19%, signal=81%
GO_RIBOSOMAL_SUBUNIT	40	0.66182613	2.20804	0.0	0.0	0.0	76	tags=73%, list=19%, signal=81%
GO_NCRNA_METABOLIC_PROCESS	42	0.661038	2.1894245	0.0	0.0	0.0	76	tags=69%, list=19%, signal=77%
GO_PROTEIN_TARGETING	55	0.62089545	2.1802003	0.0	7.638466E-5	0.002	94	tags=64%, list=24%, signal=72%
GO_PEPTIDE_METABOLIC_PROCESS	56	0.59815836	2.1481214	0.0	7.306359E-5	0.002	96	tags=64%, list=25%, signal=73%
GO_CELLULAR_AMIDE_METABOLIC_PROCESS	60	0.5903593	2.1405325	0.0	1.380815E-4	0.004	96	tags=62%, list=25%, signal=69%
GO_VIRAL_LIFE_CYCLE	54	0.6091822	2.1369672	0.0	1.3255824E-4	0.004	104	tags=69%, list=27%, signal=80%
GO_AMIDE_BIOSYNTHETIC_PROCESS	51	0.60228115	2.1333625	0.0	1.2745985E-4	0.004	94	tags=67%, list=24%, signal=76%
GO_NUCLEOLUS	39	0.63136464	2.1132565	0.0	1.2273912E-4	0.004	76	tags=56%, list=19%, signal=63%
GO_STRUCTURAL_CONSTITUENT_OF_RIBOSOME	41	0.6327946	2.0988126	0.0	1.1835558E-4	0.004	76	tags=68%, list=19%, signal=76%
GO_CELLULAR_CATABOLIC_PROCESS	103	0.5348969	2.091485	0.0	1.4337906E-4	0.005	118	tags=55%, list=30%, signal=58%
GO_RIBOSOME	43	0.61592937	2.087007	0.0	1.3859976E-4	0.005	76	tags=67%, list=19%, signal=75%
GO_MRNA_BINDING	18	0.73013103	2.0724757	0.0	2.696969E-4	0.01	75	tags=67%, list=19%, signal=79%
GO_CYTOSOLIC_PART	51	0.5803111	2.053	0.0	3.147584E-4	0.012	76	tags=59%, list=19%, signal=64%
GO_ESTABLISHMENT_OF_PROTEIN_LOCALIZATION_TO_MEMBRANE	50	0.58815736	2.0353189	0.0	4.5913522E-4	0.018	76	tags=62%, list=19%, signal=67%
GO_RNA_BINDING	119	0.5085005	2.0115151	0.0	6.1499176E-4	0.025	109	tags=47%, list=28%, signal=45%
GO_INTERSPECIES_INTERACTION_BETWEEN_ORGANISMS	83	0.5279309	1.9882087	0.0	9.848981E-4	0.04	119	tags=58%, list=31%, signal=66%
GO_STRUCTURAL_MOLECULE_ACTIVITY	56	0.56845313	1.9826617	0.0	0.0010547348	0.044	76	tags=59%, list=19%, signal=63%
GO_CATABOLIC_PROCESS	124	0.49490365	1.9826316	0.0	0.0010262284	0.044	118	tags=50%, list=30%, signal=49%
GO_POLY_A_RNA_BINDING	111	0.49788374	1.9762056	0.0	0.0011102953	0.049	94	tags=42%, list=24%, signal=40%
GO_PROTEIN_LOCALIZATION_TO_MEMBRANE	55	0.55198693	1.9647206	0.0	0.0012549872	0.057	77	tags=58%, list=20%, signal=62%
GO_CYTOSOLIC_LARGE_RIBOSOMAL_SUBUNIT	17	0.6939735	1.9532231	0.0048076925	0.00152356	0.068	92	tags=76%, list=24%, signal=96%
GO_LARGE_RIBOSOMAL_SUBUNIT	17	0.6939735	1.8948611	0.0	0.0036089767	0.155	92	tags=76%, list=24%, signal=96%
GO_ORGANONITROGEN_COMPOUND_BIOSYNTHETIC_PROCESS	78	0.49243584	1.8395846	0.0	0.007839681	0.319	95	tags=49%, list=24%, signal=52%
GO_EPITHELIAL_CELL_DIFFERENTIATION	18	0.6501626	1.8236784	0.001610306	0.009528819	0.38	26	tags=28%, list=7%, signal=28%
GO_IMMUNE_SYSTEM_DEVELOPMENT	16	0.6605598	1.8154185	0.0048154094	0.010208601	0.408	68	tags=56%, list=17%, signal=65%
GO_SMALL_RIBOSOMAL_SUBUNIT	23	0.6007399	1.8108504	0.0015673981	0.010740148	0.432	76	tags=74%, list=19%, signal=86%
GO_RRNA_BINDING	16	0.6676298	1.8083527	0.004846527	0.010987189	0.449	76	tags=63%, list=19%, signal=74%
GO_EXTRACELLULAR_SPACE	38	0.5491201	1.8063837	0.0	0.011120177	0.459	51	tags=32%, list=13%, signal=33%
GO_CYTOSOLIC_SMALL_RIBOSOMAL_SUBUNIT	23	0.6007399	1.7880769	0.0046153846	0.013895613	0.541	76	tags=74%, list=19%, signal=86%
GO_ANCHORING_JUNCTION	70	0.4776737	1.7864923	0.0026281208	0.013801101	0.546	76	tags=43%, list=19%, signal=44%
GO_REGULATION_OF_INNATE_IMMUNE_RESPONSE	16	0.651995	1.7830968	0.0075642965	0.014159288	0.559	115	tags=75%, list=29%, signal=102%
GO_INTRACELLULAR_PROTEIN_TRANSPORT	82	0.4709364	1.7740716	0.0	0.015263052	0.598	94	tags=48%, list=24%, signal=49%
GO_RNA_SPLICING	15	0.65114194	1.7691432	0.0015432099	0.015972931	0.619	41	tags=27%, list=11%, signal=29%
GO_CELL_SUBSTRATE_JUNCTION	68	0.48084888	1.763	0.0013071896	0.016718945	0.645	76	tags=44%, list=19%, signal=45%
GO_REGULATION_OF_PROTEIN_LOCALIZATION	47	0.49328306	1.7136621	0.008298756	0.027976643	0.835	30	tags=19%, list=8%, signal=18%
GO_POSTTRANSCRIPTIONAL_REGULATION_OF_GENE_EXPRESSION	36	0.51836157	1.7068826	0.005602241	0.029852089	0.849	119	tags=56%, list=31%, signal=73%
GO_REGULATION_OF_PROTEIN_SECRETION	16	0.62202233	1.6906704	0.007987221	0.034631778	0.891	30	tags=25%, list=8%, signal=26%
GO_REPRODUCTION	26	0.5539671	1.6831088	0.007518797	0.036919475	0.909	28	tags=27%, list=7%, signal=27%
GO_EPITHELIUM_DEVELOPMENT	26	0.55218494	1.6751252	0.009287925	0.039639674	0.922	33	tags=23%, list=8%, signal=24%
GO_CELLULAR_MACROMOLECULE_LOCALIZATION	92	0.43319923	1.6742823	0.0050125313	0.039354898	0.923	77	tags=40%, list=20%, signal=38%
GO_ESTABLISHMENT_OF_PROTEIN_LOCALIZATION	103	0.42151642	1.6514	0.0036855037	0.048094943	0.959	94	tags=43%, list=24%, signal=41%
GO_PROTEIN_MODIFICATION_BY_SMALL_PROTEIN_CONJUGATION_OR_REMOVAL	17	0.6081538	1.6435287	0.020634921	0.050885115	0.971	115	tags=65%, list=29%, signal=88%
GO_REGULATION_OF_PROTEIN_MODIFICATION_BY_SMALL_PROTEIN_CONJUGATION_OR_REMOVAL	16	0.59425133	1.6372045	0.015015015	0.0534102	0.976	115	tags=69%, list=29%, signal=94%
GO_NEGATIVE_REGULATION_OF_DEVELOPMENTAL_PROCESS	21	0.5650834	1.6267924	0.028485756	0.057922494	0.987	12	tags=19%, list=3%, signal=19%
GO_POSITIVE_REGULATION_OF_INTRACELLULAR_SIGNAL_TRANSDUCTION	21	0.55847234	1.6204222	0.021961933	0.060086485	0.993	98	tags=38%, list=25%, signal=48%
GO_SINGLE_ORGANISM_CELLULAR_LOCALIZATION	86	0.4209563	1.6197689	0.006393862	0.05958542	0.993	77	tags=41%, list=20%, signal=40%
GO_PROTEIN_LOCALIZATION	107	0.4114828	1.6098882	0.0	0.06386661	0.996	94	tags=42%, list=24%, signal=40%
GO_ORGANONITROGEN_COMPOUND_METABOLIC_PROCESS	135	0.39804354	1.5959506	0.0023952096	0.0717879	0.999	97	tags=36%, list=25%, signal=32%
GO_NEGATIVE_REGULATION_OF_MULTICELLULAR_ORGANISMAL_PROCESS	29	0.5150295	1.5933706	0.020289855	0.07250231	0.999	12	tags=17%, list=3%, signal=16%
GO_PERINUCLEAR_REGION_OF_CYTOPLASM	23	0.5343222	1.5910336	0.02346041	0.073082104	0.999	68	tags=35%, list=17%, signal=40%
GO_REGULATION_OF_MAPK_CASCADE	17	0.5810034	1.5905683	0.03015873	0.07228067	0.999	111	tags=53%, list=28%, signal=71%
GO_POSITIVE_REGULATION_OF_CELL_PROLIFERATION	21	0.54255617	1.5855694	0.03254438	0.074206814	1.0	89	tags=48%, list=23%, signal=58%
GO_REGULATION_OF_DEFENSE_RESPONSE	27	0.5169707	1.5807253	0.01925926	0.07662815	1.0	115	tags=59%, list=29%, signal=78%
GO_NEGATIVE_REGULATION_OF_CELL_DIFFERENTIATION	16	0.5797137	1.5665004	0.021875	0.08464614	1.0	12	tags=19%, list=3%, signal=19%
GO_POSITIVE_REGULATION_OF_MULTICELLULAR_ORGANISMAL_PROCESS	38	0.4740913	1.5595682	0.016081871	0.088451594	1.0	30	tags=21%, list=8%, signal=21%
GO_REGULATION_OF_RESPONSE_TO_STRESS	55	0.4380356	1.5385936	0.021447722	0.10282385	1.0	115	tags=45%, list=29%, signal=55%
GO_SENSORY_ORGAN_DEVELOPMENT	15	0.57993245	1.5357393	0.035256412	0.104151875	1.0	10	tags=20%, list=3%, signal=20%
GO_POSITIVE_REGULATION_OF_IMMUNE_RESPONSE	23	0.5200507	1.5296199	0.026431719	0.107666604	1.0	115	tags=61%, list=29%, signal=81%
GO_MEMBRANE_ORGANIZATION	88	0.39755672	1.5280515	0.009864365	0.10739127	1.0	77	tags=40%, list=20%, signal=38%
GO_POSITIVE_REGULATION_OF_TRANSFERASE_ACTIVITY	26	0.4925809	1.510163	0.049132947	0.12186637	1.0	115	tags=58%, list=29%, signal=76%
GO_REGULATION_OF_CELL_CYCLE_PROCESS	15	0.5592223	1.5062432	0.04784689	0.12374558	1.0	115	tags=53%, list=29%, signal=73%
GO_REGULATION_OF_CELL_CYCLE	21	0.52414274	1.4995222	0.046178345	0.12809898	1.0	115	tags=52%, list=29%, signal=70%
GO_PROTEIN_CATABOLIC_PROCESS	18	0.5351332	1.4961544	0.04855842	0.12952787	1.0	115	tags=61%, list=29%, signal=83%
GO_SEXUAL_REPRODUCTION	15	0.5643908	1.4824272	0.0608	0.14140551	1.0	96	tags=53%, list=25%, signal=68%
GO_ORGANELLE_ASSEMBLY	18	0.5297569	1.4783877	0.060509555	0.14364575	1.0	117	tags=61%, list=30%, signal=83%
GO_REGULATION_OF_ORGAN_MORPHOGENESIS	15	0.56417394	1.4720699	0.072115384	0.14838842	1.0	115	tags=53%, list=29%, signal=73%
GO_RIBONUCLEOPROTEIN_GRANULE	15	0.54807407	1.4703491	0.060606062	0.14867772	1.0	45	tags=33%, list=12%, signal=36%
GO_REGULATION_OF_CELLULAR_COMPONENT_MOVEMENT	20	0.5034534	1.4676425	0.0612855	0.14968751	1.0	11	tags=15%, list=3%, signal=15%
GO_POSITIVE_REGULATION_OF_IMMUNE_SYSTEM_PROCESS	25	0.48753822	1.4658315	0.047839507	0.14962488	1.0	115	tags=56%, list=29%, signal=74%
GO_REGULATION_OF_IMMUNE_RESPONSE	27	0.4763086	1.4625568	0.05087209	0.15169683	1.0	115	tags=56%, list=29%, signal=73%
GO_PEPTIDASE_ACTIVITY	16	0.52833676	1.4476966	0.069767445	0.16609994	1.0	115	tags=56%, list=29%, signal=77%
GO_CHROMOSOME_ORGANIZATION	15	0.5317037	1.4426922	0.075851396	0.16994607	1.0	3	tags=13%, list=1%, signal=13%
GO_REGULATION_OF_CELL_PROLIFERATION	36	0.43971407	1.4342533	0.042274054	0.17817263	1.0	111	tags=42%, list=28%, signal=53%
GO_CHROMOSOME	16	0.5293342	1.4336032	0.07716049	0.17702053	1.0	10	tags=19%, list=3%, signal=18%
GO_CIRCULATORY_SYSTEM_DEVELOPMENT	21	0.48830912	1.4213023	0.07739938	0.18981567	1.0	113	tags=52%, list=29%, signal=70%
GO_ENDOPEPTIDASE_ACTIVITY	15	0.52909964	1.4082103	0.08116883	0.20472665	1.0	115	tags=60%, list=29%, signal=82%
GO_POSITIVE_REGULATION_OF_PROTEIN_METABOLIC_PROCESS	58	0.3947254	1.407183	0.051490515	0.20394741	1.0	115	tags=45%, list=29%, signal=54%
GO_TISSUE_DEVELOPMENT	41	0.42417854	1.406676	0.07334273	0.20248784	1.0	99	tags=37%, list=25%, signal=44%
GO_REGULATION_OF_INTRACELLULAR_SIGNAL_TRANSDUCTION	37	0.42348832	1.4051461	0.08146068	0.2022795	1.0	111	tags=41%, list=28%, signal=51%
GO_POSITIVE_REGULATION_OF_ESTABLISHMENT_OF_PROTEIN_LOCALIZATION	24	0.47148505	1.4047955	0.078751855	0.20072123	1.0	68	tags=29%, list=17%, signal=33%
GO_POSITIVE_REGULATION_OF_MOLECULAR_FUNCTION	59	0.38849017	1.4023453	0.06016043	0.20183997	1.0	119	tags=49%, list=31%, signal=60%
GO_POSITIVE_REGULATION_OF_CELLULAR_PROTEIN_LOCALIZATION	18	0.49731177	1.4021618	0.11041991	0.20015271	1.0	68	tags=33%, list=17%, signal=39%
GO_ACTIVATION_OF_IMMUNE_RESPONSE	19	0.4981575	1.4002461	0.0851735	0.20040366	1.0	115	tags=63%, list=29%, signal=85%
GO_REGULATION_OF_RNA_STABILITY	17	0.5056915	1.3936415	0.1095008	0.20733629	1.0	119	tags=53%, list=31%, signal=73%
GO_FOREBRAIN_DEVELOPMENT	16	0.5142123	1.39156	0.10534351	0.20806548	1.0	13	tags=19%, list=3%, signal=19%
GO_POSITIVE_REGULATION_OF_PROTEIN_MODIFICATION_PROCESS	35	0.42237148	1.3898256	0.09051724	0.20828244	1.0	115	tags=49%, list=29%, signal=63%
GO_REGULATION_OF_RESPONSE_TO_EXTERNAL_STIMULUS	26	0.45229623	1.3796208	0.09566517	0.21932021	1.0	13	tags=15%, list=3%, signal=15%
GO_POSITIVE_REGULATION_OF_CELL_DIFFERENTIATION	26	0.45465842	1.378926	0.08309038	0.21814525	1.0	30	tags=19%, list=8%, signal=19%
GO_CELL_JUNCTION	89	0.3591648	1.3776834	0.032994922	0.2178059	1.0	76	tags=35%, list=19%, signal=33%
GO_POSITIVE_REGULATION_OF_PROTEOLYSIS	21	0.4749656	1.3774554	0.08763693	0.21611175	1.0	115	tags=62%, list=29%, signal=83%
GO_CELL_PROLIFERATION	18	0.4899385	1.377221	0.091883615	0.214452	1.0	28	tags=22%, list=7%, signal=23%
GO_CELL_SURFACE	30	0.43449613	1.3756493	0.08284884	0.21445982	1.0	22	tags=17%, list=6%, signal=16%
GO_POSITIVE_REGULATION_OF_CELL_COMMUNICATION	49	0.3952408	1.3694254	0.07133059	0.22053543	1.0	119	tags=39%, list=31%, signal=49%
GO_PIGMENT_GRANULE	31	0.43852463	1.3681409	0.094151214	0.22013564	1.0	165	tags=68%, list=42%, signal=108%
GO_NEGATIVE_REGULATION_OF_NERVOUS_SYSTEM_DEVELOPMENT	17	0.49916446	1.3630509	0.106796116	0.224923	1.0	12	tags=18%, list=3%, signal=17%
GO_REGULATION_OF_CELLULAR_PROTEIN_LOCALIZATION	28	0.43720588	1.3616606	0.11042945	0.22489022	1.0	14	tags=14%, list=4%, signal=14%
GO_NEGATIVE_REGULATION_OF_CELLULAR_COMPONENT_ORGANIZATION	40	0.40595302	1.3605536	0.09129815	0.2244123	1.0	106	tags=38%, list=27%, signal=46%
GO_REGULATION_OF_CELLULAR_AMIDE_METABOLIC_PROCESS	25	0.44775513	1.3593614	0.10510949	0.22416118	1.0	106	tags=48%, list=27%, signal=62%
GO_REGULATION_OF_PROTEIN_CATABOLIC_PROCESS	21	0.47045708	1.3517615	0.11411411	0.23232237	1.0	139	tags=71%, list=36%, signal=105%
GO_NEGATIVE_REGULATION_OF_NITROGEN_COMPOUND_METABOLIC_PROCESS	29	0.43368584	1.3493828	0.12616822	0.23346938	1.0	16	tags=14%, list=4%, signal=13%
GO_CELLULAR_LIPID_CATABOLIC_PROCESS	17	0.4836462	1.3427321	0.13880126	0.24042375	1.0	126	tags=53%, list=32%, signal=75%
GO_MITOTIC_CELL_CYCLE	32	0.42269635	1.3418937	0.11806543	0.23955292	1.0	115	tags=47%, list=29%, signal=61%
GO_POSITIVE_REGULATION_OF_CATALYTIC_ACTIVITY	49	0.3831809	1.3389488	0.07219251	0.24183288	1.0	119	tags=49%, list=31%, signal=62%
GO_IMMUNE_RESPONSE	17	0.48616737	1.337628	0.143951	0.24162148	1.0	28	tags=24%, list=7%, signal=24%
GO_NEGATIVE_REGULATION_OF_RESPONSE_TO_STIMULUS	38	0.3924306	1.3171957	0.12280702	0.2688644	1.0	119	tags=47%, list=31%, signal=62%
GO_REGULATION_OF_HOMEOSTATIC_PROCESS	15	0.4894624	1.3159041	0.15873016	0.26853997	1.0	12	tags=20%, list=3%, signal=20%
GO_PEPTIDYL_AMINO_ACID_MODIFICATION	20	0.45694986	1.3089547	0.1387632	0.2770912	1.0	10	tags=15%, list=3%, signal=15%
GO_RECEPTOR_BINDING	43	0.38347363	1.3067684	0.10245901	0.27813283	1.0	110	tags=35%, list=28%, signal=43%
GO_LIPID_CATABOLIC_PROCESS	21	0.4528384	1.3034368	0.1486068	0.28100607	1.0	126	tags=48%, list=32%, signal=67%
GO_POSITIVE_REGULATION_OF_CELL_DEATH	29	0.40980786	1.3016287	0.13304093	0.28137758	1.0	75	tags=28%, list=19%, signal=32%
GO_SINGLE_ORGANISM_CELL_ADHESION	15	0.4931989	1.300267	0.15292354	0.28113857	1.0	68	tags=33%, list=17%, signal=39%
GO_EXTRACELLULAR_MATRIX	16	0.4810666	1.2998215	0.1609756	0.27970108	1.0	101	tags=56%, list=26%, signal=73%
GO_POSITIVE_REGULATION_OF_BIOSYNTHETIC_PROCESS	43	0.3821182	1.2993382	0.12292818	0.27831015	1.0	107	tags=40%, list=27%, signal=48%
GO_DEFENSE_RESPONSE	21	0.44720116	1.2926288	0.15022762	0.2861883	1.0	14	tags=19%, list=4%, signal=19%
GO_RESPONSE_TO_EXTERNAL_STIMULUS	56	0.35587966	1.2919769	0.104477614	0.2849827	1.0	27	tags=16%, list=7%, signal=15%
GO_POSITIVE_REGULATION_OF_NERVOUS_SYSTEM_DEVELOPMENT	18	0.45996374	1.2912772	0.15957446	0.28388757	1.0	30	tags=22%, list=8%, signal=23%
GO_REGULATION_OF_PROTEIN_MODIFICATION_PROCESS	49	0.3720773	1.2877846	0.12567568	0.2869251	1.0	119	tags=47%, list=31%, signal=59%
GO_SULFUR_COMPOUND_BINDING	17	0.46772015	1.2831212	0.1615509	0.29164612	1.0	44	tags=24%, list=11%, signal=25%
GO_REGULATION_OF_IMMUNE_SYSTEM_PROCESS	35	0.39276847	1.2816033	0.14347826	0.2918083	1.0	115	tags=49%, list=29%, signal=63%
GO_POSITIVE_REGULATION_OF_DEVELOPMENTAL_PROCESS	29	0.4139216	1.2809445	0.16	0.29062933	1.0	30	tags=17%, list=8%, signal=17%
GO_ANATOMICAL_STRUCTURE_FORMATION_INVOLVED_IN_MORPHOGENESIS	19	0.44237202	1.2750753	0.17168675	0.29772547	1.0	113	tags=58%, list=29%, signal=78%
GO_VACUOLAR_PART	28	0.4064457	1.27485	0.14615385	0.29596448	1.0	67	tags=36%, list=17%, signal=40%
GO_REGULATION_OF_TRANSCRIPTION_FROM_RNA_POLYMERASE_II_PROMOTER	16	0.47111422	1.2723597	0.17715232	0.29777682	1.0	22	tags=19%, list=6%, signal=19%
GO_POSITIVE_REGULATION_OF_NEURON_PROJECTION_DEVELOPMENT	17	0.46332818	1.2696812	0.1734375	0.299808	1.0	30	tags=24%, list=8%, signal=24%
GO_POSITIVE_REGULATION_OF_GENE_EXPRESSION	31	0.40204263	1.2686028	0.16029412	0.29934078	1.0	107	tags=42%, list=27%, signal=53%
GO_REGULATION_OF_CELLULAR_LOCALIZATION	61	0.35384953	1.2674061	0.10909091	0.29897413	1.0	30	tags=15%, list=8%, signal=13%
GO_POSITIVE_REGULATION_OF_NEURON_DIFFERENTIATION	17	0.46332818	1.2658267	0.15022762	0.29935366	1.0	30	tags=24%, list=8%, signal=24%
GO_POSITIVE_REGULATION_OF_PHOSPHORUS_METABOLIC_PROCESS	27	0.4059952	1.2651813	0.17737003	0.2983425	1.0	104	tags=41%, list=27%, signal=52%
GO_RESPONSE_TO_LIPID	26	0.4191841	1.2606231	0.17830609	0.3032186	1.0	22	tags=19%, list=6%, signal=19%
GO_NEGATIVE_REGULATION_OF_CELL_DEVELOPMENT	15	0.4787312	1.2604777	0.1800643	0.30133876	1.0	12	tags=13%, list=3%, signal=13%
GO_CELLULAR_RESPONSE_TO_OXYGEN_CONTAINING_COMPOUND	28	0.4004754	1.2563784	0.16936672	0.30583578	1.0	22	tags=18%, list=6%, signal=18%
GO_REGULATION_OF_CELL_DIFFERENTIATION	42	0.3754789	1.2548172	0.15647227	0.3060139	1.0	30	tags=17%, list=8%, signal=16%
GO_POSITIVE_REGULATION_OF_PROTEIN_CATABOLIC_PROCESS	15	0.4738333	1.2524765	0.20325203	0.30767462	1.0	137	tags=73%, list=35%, signal=109%
GO_REGULATION_OF_CELLULAR_RESPONSE_TO_STRESS	29	0.40299162	1.2497091	0.15558912	0.30980617	1.0	111	tags=41%, list=28%, signal=54%
GO_RESPONSE_TO_ALCOHOL	15	0.46366242	1.2445686	0.22006473	0.31554094	1.0	18	tags=20%, list=5%, signal=20%
GO_IMMUNE_SYSTEM_PROCESS	64	0.33931106	1.2384509	0.15862069	0.32289577	1.0	115	tags=41%, list=29%, signal=48%
GO_POSITIVE_REGULATION_OF_RESPONSE_TO_STIMULUS	55	0.34307924	1.2336695	0.15860215	0.32846147	1.0	119	tags=40%, list=31%, signal=49%
GO_MULTI_ORGANISM_REPRODUCTIVE_PROCESS	17	0.45542392	1.2301393	0.20625	0.3321015	1.0	96	tags=47%, list=25%, signal=60%
GO_REGULATION_OF_TRANSFERASE_ACTIVITY	34	0.37919062	1.2270383	0.20365168	0.33509475	1.0	115	tags=53%, list=29%, signal=69%
GO_PROTEIN_HOMODIMERIZATION_ACTIVITY	24	0.41166443	1.2253019	0.20647149	0.33582047	1.0	106	tags=42%, list=27%, signal=54%
GO_CELL_CELL_ADHESION	15	0.46643	1.2222726	0.2199688	0.338729	1.0	68	tags=33%, list=17%, signal=39%
GO_PROTEIN_DIMERIZATION_ACTIVITY	32	0.3816956	1.2213651	0.18942732	0.33813083	1.0	106	tags=38%, list=27%, signal=47%
GO_CELL_CYCLE_PROCESS	40	0.36377022	1.22071	0.19168901	0.33706385	1.0	115	tags=40%, list=29%, signal=51%
GO_HOMEOSTATIC_PROCESS	55	0.33794236	1.2201179	0.15683647	0.33592513	1.0	111	tags=40%, list=28%, signal=48%
GO_CELLULAR_LIPID_METABOLIC_PROCESS	30	0.3883142	1.218686	0.22352941	0.33589047	1.0	103	tags=33%, list=26%, signal=42%
GO_WNT_SIGNALING_PATHWAY	16	0.4517678	1.2179538	0.22507553	0.33506525	1.0	115	tags=56%, list=29%, signal=77%
GO_RESPONSE_TO_STEROID_HORMONE	18	0.4375	1.2161374	0.23397914	0.33607677	1.0	1	tags=11%, list=0%, signal=11%
GO_REGULATION_OF_PROTEOLYSIS	30	0.38333338	1.2112222	0.21820809	0.34191853	1.0	115	tags=47%, list=29%, signal=61%
GO_ESTABLISHMENT_OF_LOCALIZATION_IN_CELL	127	0.30026546	1.2088552	0.14578313	0.343662	1.0	121	tags=41%, list=31%, signal=40%
GO_LYTIC_VACUOLE	27	0.39045963	1.2061825	0.20795107	0.3456906	1.0	67	tags=37%, list=17%, signal=42%
GO_REGULATION_OF_CATABOLIC_PROCESS	35	0.3666306	1.1977482	0.20405406	0.3570941	1.0	153	tags=63%, list=39%, signal=94%
GO_IDENTICAL_PROTEIN_BINDING	51	0.3413738	1.1966336	0.22176309	0.35661566	1.0	22	tags=14%, list=6%, signal=13%
GO_REGULATION_OF_ANATOMICAL_STRUCTURE_MORPHOGENESIS	41	0.3504306	1.183646	0.2517194	0.3751603	1.0	115	tags=39%, list=29%, signal=50%
GO_CELL_CYCLE	41	0.35306093	1.1824741	0.22065064	0.37492397	1.0	115	tags=39%, list=29%, signal=50%
GO_NEGATIVE_REGULATION_OF_MOLECULAR_FUNCTION	33	0.36592507	1.1758523	0.23871906	0.38347247	1.0	115	tags=42%, list=29%, signal=55%
GO_NEGATIVE_REGULATION_OF_GENE_EXPRESSION	27	0.38131177	1.1707224	0.2716593	0.390012	1.0	91	tags=30%, list=23%, signal=36%
GO_REGULATION_OF_CELL_DEVELOPMENT	34	0.3549453	1.1698478	0.24489796	0.3892832	1.0	30	tags=18%, list=8%, signal=17%
GO_CELLULAR_RESPONSE_TO_CYTOKINE_STIMULUS	18	0.41606927	1.1588736	0.29096478	0.40600464	1.0	115	tags=50%, list=29%, signal=68%
GO_LIPID_METABOLIC_PROCESS	40	0.34186918	1.1580251	0.24751067	0.4052122	1.0	25	tags=13%, list=6%, signal=12%
GO_POSITIVE_REGULATION_OF_CELL_DEVELOPMENT	21	0.39803353	1.1507272	0.2797619	0.41505623	1.0	30	tags=19%, list=8%, signal=20%
GO_POSITIVE_REGULATION_OF_CATABOLIC_PROCESS	19	0.40519485	1.1493293	0.27272728	0.41513622	1.0	115	tags=53%, list=29%, signal=71%
GO_VACUOLE	50	0.3305823	1.1458955	0.26675788	0.41869092	1.0	69	tags=30%, list=18%, signal=32%
GO_REGULATION_OF_NEURON_PROJECTION_DEVELOPMENT	26	0.37627015	1.1413336	0.2851064	0.42403156	1.0	30	tags=19%, list=8%, signal=19%
GO_CELL_CORTEX	16	0.41135648	1.1386652	0.2794562	0.42665622	1.0	50	tags=31%, list=13%, signal=34%
GO_REGULATION_OF_NEURON_DIFFERENTIATION	28	0.36137512	1.1382011	0.27575758	0.42520052	1.0	30	tags=18%, list=8%, signal=18%
GO_POSITIVE_REGULATION_OF_SECRETION	16	0.4202083	1.1348064	0.3	0.42870677	1.0	22	tags=19%, list=6%, signal=19%
GO_ANTIGEN_PROCESSING_AND_PRESENTATION_OF_PEPTIDE_ANTIGEN	18	0.40651694	1.1346312	0.3127889	0.42667612	1.0	121	tags=50%, list=31%, signal=69%
GO_ANTIGEN_PROCESSING_AND_PRESENTATION	18	0.4065169	1.1288222	0.32357472	0.43445858	1.0	121	tags=50%, list=31%, signal=69%
GO_RESPONSE_TO_HORMONE	35	0.34450603	1.1254883	0.28879312	0.43801287	1.0	18	tags=11%, list=5%, signal=11%
GO_CELLULAR_RESPONSE_TO_ORGANIC_SUBSTANCE	64	0.30631667	1.1236686	0.2855263	0.43890426	1.0	115	tags=34%, list=29%, signal=41%
GO_CELLULAR_HOMEOSTASIS	31	0.35593116	1.1191691	0.2826399	0.44482374	1.0	110	tags=45%, list=28%, signal=58%
GO_REGULATION_OF_MULTICELLULAR_ORGANISMAL_DEVELOPMENT	52	0.31748012	1.1175878	0.3117409	0.44511685	1.0	115	tags=38%, list=29%, signal=47%
GO_RESPONSE_TO_EXTRACELLULAR_STIMULUS	17	0.40562272	1.1156797	0.31023103	0.44604695	1.0	11	tags=12%, list=3%, signal=12%
GO_ENZYME_REGULATOR_ACTIVITY	26	0.3625908	1.1132575	0.33768117	0.44786698	1.0	15	tags=12%, list=4%, signal=11%
GO_RESPONSE_TO_OXYGEN_CONTAINING_COMPOUND	50	0.32017994	1.1014459	0.30410182	0.4659644	1.0	23	tags=14%, list=6%, signal=13%
GO_LIPID_OXIDATION	15	0.41134337	1.1007801	0.3527559	0.46473634	1.0	126	tags=47%, list=32%, signal=66%
GO_ENDOSOME	30	0.35384414	1.0987414	0.34421366	0.4660776	1.0	69	tags=27%, list=18%, signal=30%
GO_CHEMICAL_HOMEOSTASIS	38	0.3301136	1.0876344	0.32217574	0.4833804	1.0	111	tags=45%, list=28%, signal=56%
GO_LIPID_MODIFICATION	15	0.41134337	1.085549	0.3441034	0.48450524	1.0	126	tags=47%, list=32%, signal=66%
GO_CELLULAR_CHEMICAL_HOMEOSTASIS	25	0.3620487	1.0739899	0.3705357	0.50293523	1.0	110	tags=52%, list=28%, signal=68%
GO_CELLULAR_RESPONSE_TO_STRESS	44	0.31039098	1.0655607	0.36351165	0.5158477	1.0	14	tags=9%, list=4%, signal=8%
GO_LIPID_BINDING	31	0.3316684	1.065234	0.36701337	0.5137718	1.0	90	tags=39%, list=23%, signal=46%
GO_REGULATION_OF_CELL_MORPHOGENESIS	24	0.35531545	1.0628353	0.39617082	0.51571035	1.0	30	tags=13%, list=8%, signal=13%
GO_TAXIS	16	0.38502675	1.0601168	0.37461773	0.5184596	1.0	11	tags=13%, list=3%, signal=12%
GO_NEGATIVE_REGULATION_OF_CATALYTIC_ACTIVITY	28	0.33582276	1.0527034	0.41679388	0.5291883	1.0	115	tags=43%, list=29%, signal=56%
GO_REGULATION_OF_NERVOUS_SYSTEM_DEVELOPMENT	31	0.33287963	1.0508125	0.39027983	0.53018326	1.0	30	tags=16%, list=8%, signal=16%
GO_POSITIVE_REGULATION_OF_TRANSPORT	39	0.3106842	1.0487243	0.3897059	0.53139067	1.0	77	tags=28%, list=20%, signal=32%
GO_RESPONSE_TO_ORGANIC_CYCLIC_COMPOUND	37	0.31789663	1.0484018	0.3962264	0.5293306	1.0	18	tags=11%, list=5%, signal=10%
GO_POSITIVE_REGULATION_OF_CELL_PROJECTION_ORGANIZATION	24	0.35075787	1.0452307	0.4054054	0.5323119	1.0	30	tags=17%, list=8%, signal=17%
GO_UBIQUITIN_LIKE_PROTEIN_LIGASE_BINDING	16	0.38066134	1.0444347	0.4095092	0.53128046	1.0	39	tags=19%, list=10%, signal=20%
GO_AUTOPHAGY	19	0.3630354	1.0418043	0.41615853	0.53320336	1.0	67	tags=26%, list=17%, signal=30%
GO_RESPONSE_TO_BIOTIC_STIMULUS	18	0.37811437	1.0398685	0.4266467	0.5340361	1.0	38	tags=28%, list=10%, signal=29%
GO_CELLULAR_RESPONSE_TO_ORGANIC_CYCLIC_COMPOUND	20	0.36121783	1.038713	0.43174604	0.53358763	1.0	10	tags=10%, list=3%, signal=10%
GO_CENTROSOME	18	0.36812744	1.0362722	0.4165342	0.53525025	1.0	30	tags=17%, list=8%, signal=17%
GO_REGULATION_OF_CELL_DEATH	66	0.28109202	1.0282062	0.41888297	0.5471706	1.0	28	tags=11%, list=7%, signal=9%
GO_HEAD_DEVELOPMENT	41	0.3057217	1.0273134	0.43661973	0.5462302	1.0	13	tags=10%, list=3%, signal=9%
GO_MOLECULAR_FUNCTION_REGULATOR	31	0.32256693	1.0268477	0.42318842	0.5445133	1.0	15	tags=10%, list=4%, signal=9%
GO_PROTEOLYSIS	26	0.33491507	1.0237916	0.43404254	0.5478334	1.0	115	tags=42%, list=29%, signal=56%
GO_MICROTUBULE_ORGANIZING_CENTER	22	0.336918	1.0075477	0.45166162	0.57456625	1.0	33	tags=18%, list=8%, signal=19%
GO_ORGANIC_ACID_BINDING	17	0.36442342	1.0054541	0.46058732	0.5757388	1.0	30	tags=18%, list=8%, signal=18%
GO_RESPONSE_TO_DRUG	22	0.34069684	0.99877137	0.4593796	0.5852691	1.0	12	tags=9%, list=3%, signal=9%
GO_CELLULAR_RESPONSE_TO_ENDOGENOUS_STIMULUS	32	0.3108628	0.99031496	0.46031746	0.5984897	1.0	18	tags=9%, list=5%, signal=9%
GO_PROTEIN_PHOSPHORYLATION	18	0.35684347	0.98509145	0.49085367	0.6056338	1.0	119	tags=56%, list=31%, signal=76%
GO_ENDOPLASMIC_RETICULUM	51	0.28209564	0.9828052	0.5020576	0.6070683	1.0	12	tags=6%, list=3%, signal=5%
GO_RESPONSE_TO_CYTOKINE	24	0.32371584	0.9803988	0.49858356	0.6086844	1.0	115	tags=42%, list=29%, signal=55%
GO_CENTRAL_NERVOUS_SYSTEM_DEVELOPMENT	45	0.28758255	0.9750406	0.5006878	0.61613965	1.0	13	tags=9%, list=3%, signal=8%
GO_CELL_ACTIVATION	20	0.33293918	0.96839255	0.5151976	0.62510985	1.0	44	tags=20%, list=11%, signal=21%
GO_NEGATIVE_REGULATION_OF_TRANSPORT	18	0.3421885	0.9680685	0.49133858	0.6230046	1.0	103	tags=39%, list=26%, signal=50%
GO_COENZYME_BINDING	28	0.3114641	0.9635993	0.5383459	0.62818176	1.0	25	tags=11%, list=6%, signal=11%
GO_NEGATIVE_REGULATION_OF_CELL_DEATH	41	0.2826691	0.9547713	0.53856945	0.6417936	1.0	111	tags=37%, list=28%, signal=46%
GO_NEGATIVE_REGULATION_OF_PROTEIN_METABOLIC_PROCESS	36	0.28388458	0.9454269	0.5472222	0.6555218	1.0	119	tags=44%, list=31%, signal=58%
GO_POSITIVE_REGULATION_OF_CELLULAR_COMPONENT_ORGANIZATION	54	0.26563424	0.9444243	0.5425101	0.65456116	1.0	101	tags=31%, list=26%, signal=37%
GO_CYTOSKELETON	76	0.24859494	0.9312698	0.5963542	0.67576325	1.0	55	tags=18%, list=14%, signal=17%
GO_REGULATION_OF_CELL_PROJECTION_ORGANIZATION	37	0.2806502	0.9266754	0.5638149	0.68092483	1.0	30	tags=14%, list=8%, signal=13%
GO_CELL_MOTILITY	26	0.30089644	0.9148419	0.5863636	0.69882935	1.0	17	tags=12%, list=4%, signal=11%
GO_NEUROGENESIS	63	0.25019634	0.9138156	0.61904764	0.69779694	1.0	30	tags=11%, list=8%, signal=10%
GO_RESPONSE_TO_ENDOGENOUS_STIMULUS	52	0.2597309	0.9057262	0.61764705	0.70910484	1.0	18	tags=8%, list=5%, signal=7%
GO_CYTOSKELETAL_PART	60	0.2502901	0.9052022	0.61251664	0.70704544	1.0	142	tags=48%, list=36%, signal=64%
GO_RESPONSE_TO_NITROGEN_COMPOUND	36	0.2710078	0.893978	0.62777776	0.72388273	1.0	18	tags=8%, list=5%, signal=8%
GO_SYSTEM_PROCESS	34	0.2783265	0.8938466	0.625	0.72110337	1.0	101	tags=35%, list=26%, signal=43%
GO_NUCLEAR_TRANSPORT	21	0.30463377	0.8917245	0.6015873	0.72176486	1.0	198	tags=71%, list=51%, signal=137%
GO_SINGLE_ORGANISM_CATABOLIC_PROCESS	68	0.24291942	0.8851844	0.67670155	0.7301364	1.0	40	tags=13%, list=10%, signal=12%
GO_CYTOPLASMIC_REGION	20	0.31045827	0.88390785	0.62480855	0.7293162	1.0	50	tags=25%, list=13%, signal=27%
GO_MONOCARBOXYLIC_ACID_CATABOLIC_PROCESS	16	0.32388124	0.8786946	0.6228482	0.73546267	1.0	126	tags=44%, list=32%, signal=62%
GO_ENDOCYTOSIS	23	0.2957866	0.8767642	0.6351145	0.7357846	1.0	22	tags=13%, list=6%, signal=13%
GO_VACUOLAR_MEMBRANE	24	0.29661992	0.864442	0.650546	0.75395435	1.0	63	tags=25%, list=16%, signal=28%
GO_REGULATION_OF_KINASE_ACTIVITY	21	0.29779023	0.86190456	0.6671827	0.7552514	1.0	111	tags=43%, list=28%, signal=57%
GO_ION_HOMEOSTASIS	27	0.2781987	0.850426	0.68328446	0.7715656	1.0	110	tags=44%, list=28%, signal=58%
GO_NEUROLOGICAL_SYSTEM_PROCESS	19	0.30052486	0.84911525	0.66816145	0.7706144	1.0	35	tags=16%, list=9%, signal=17%
GO_SINGLE_ORGANISM_BEHAVIOR	15	0.31292516	0.8434989	0.67460316	0.77695704	1.0	0	tags=7%, list=0%, signal=6%
GO_NEGATIVE_REGULATION_OF_PROTEIN_MODIFICATION_PROCESS	21	0.28600234	0.8363156	0.70030123	0.7856418	1.0	119	tags=52%, list=31%, signal=71%
GO_POSITIVE_REGULATION_OF_HYDROLASE_ACTIVITY	21	0.28363916	0.8296461	0.6931298	0.79319733	1.0	90	tags=38%, list=23%, signal=47%
GO_ORGANONITROGEN_COMPOUND_CATABOLIC_PROCESS	18	0.28636107	0.82189715	0.7076677	0.8023452	1.0	25	tags=11%, list=6%, signal=11%
GO_PROTEIN_FOLDING	25	0.2635138	0.8143456	0.72888887	0.811282	1.0	12	tags=8%, list=3%, signal=8%
GO_REGULATION_OF_PHOSPHORUS_METABOLIC_PROCESS	46	0.23498385	0.81183827	0.77437323	0.81213063	1.0	111	tags=30%, list=28%, signal=38%
GO_REGULATION_OF_MULTI_ORGANISM_PROCESS	22	0.2746784	0.8099736	0.70674485	0.81187844	1.0	151	tags=41%, list=39%, signal=63%
GO_BIOLOGICAL_ADHESION	30	0.25292397	0.7986851	0.78409094	0.82571846	1.0	44	tags=17%, list=11%, signal=17%
GO_RESPONSE_TO_ABIOTIC_STIMULUS	30	0.25168192	0.79518366	0.8	0.82774746	1.0	104	tags=30%, list=27%, signal=38%
GO_REGULATION_OF_APOPTOTIC_SIGNALING_PATHWAY	23	0.2685903	0.79464227	0.7577548	0.8253474	1.0	129	tags=39%, list=33%, signal=55%
GO_CELL_DEATH	34	0.23900554	0.7775345	0.8123167	0.84722245	1.0	84	tags=26%, list=22%, signal=31%
GO_RESPONSE_TO_PEPTIDE	16	0.28464252	0.77745384	0.7656501	0.844108	1.0	18	tags=13%, list=5%, signal=13%
GO_COFACTOR_BINDING	36	0.23219807	0.7763587	0.8235294	0.8424911	1.0	25	tags=8%, list=6%, signal=8%
GO_LYTIC_VACUOLE_MEMBRANE	17	0.27603528	0.7633523	0.7759146	0.8571535	1.0	63	tags=24%, list=16%, signal=27%
GO_ORGANIC_HYDROXY_COMPOUND_METABOLIC_PROCESS	19	0.2692398	0.7593226	0.78203243	0.859393	1.0	101	tags=32%, list=26%, signal=41%
GO_REGULATION_OF_HORMONE_LEVELS	18	0.2674976	0.7520018	0.8123028	0.8659144	1.0	30	tags=11%, list=8%, signal=11%
GO_ENDOPLASMIC_RETICULUM_PART	39	0.22182553	0.7290015	0.8472419	0.89124984	1.0	12	tags=5%, list=3%, signal=5%
GO_ORGANIC_ACID_BIOSYNTHETIC_PROCESS	15	0.271942	0.7189774	0.83950615	0.8995906	1.0	4	tags=7%, list=1%, signal=6%
GO_PROTEIN_OLIGOMERIZATION	26	0.22552103	0.676422	0.9055472	0.9398036	1.0	65	tags=19%, list=17%, signal=22%
GO_UNFOLDED_PROTEIN_BINDING	17	0.23818412	0.6656109	0.911147	0.9456523	1.0	182	tags=71%, list=47%, signal=127%
GO_ORGANIC_ACID_CATABOLIC_PROCESS	27	0.21330187	0.66171926	0.9245014	0.94536525	1.0	103	tags=26%, list=26%, signal=33%
GO_RESPONSE_TO_REACTIVE_OXYGEN_SPECIES	18	0.23345743	0.6522456	0.91512346	0.9494617	1.0	130	tags=44%, list=33%, signal=64%
GO_SMALL_MOLECULE_CATABOLIC_PROCESS	41	0.19429533	0.648351	0.95301026	0.94880915	1.0	103	tags=24%, list=26%, signal=30%
GO_ALPHA_AMINO_ACID_METABOLIC_PROCESS	16	0.23484431	0.6481275	0.90429044	0.9455	1.0	39	tags=13%, list=10%, signal=13%
GO_CALCIUM_ION_BINDING	20	0.22207552	0.64030474	0.9389881	0.9476176	1.0	81	tags=30%, list=21%, signal=36%
GO_MITOCHONDRIAL_TRANSPORT	23	0.19539738	0.58387417	0.9589041	0.97536826	1.0	120	tags=30%, list=31%, signal=41%
GO_FATTY_ACID_METABOLIC_PROCESS	20	0.20255741	0.57309973	0.960961	0.9762445	1.0	126	tags=35%, list=32%, signal=49%
GO_GUANYL_NUCLEOTIDE_BINDING	26	0.17741677	0.54973215	0.98245615	0.9807239	1.0	4	tags=4%, list=1%, signal=4%

## Sheet: GSEA_negative_enrichment
NAME	SIZE	ES	NES	NOM p-val	FDR q-val	FWER p-val	RANK AT MAX	LEADING EDGE
GO_SYNAPTIC_SIGNALING	22	-0.6572873	-2.1815882	0.0	0.017414501	0.013	58	tags=55%, list=15%, signal=60%
GO_CELL_CELL_SIGNALING	24	-0.63621145	-2.1671448	0.0	0.009330669	0.014	58	tags=50%, list=15%, signal=55%
GO_SECRETORY_VESICLE	25	-0.61163265	-2.1349638	0.0	0.008397511	0.019	66	tags=52%, list=17%, signal=59%
GO_CELLULAR_RESPIRATION	29	-0.5856492	-2.1165926	0.0	0.00835236	0.025	125	tags=72%, list=32%, signal=99%
GO_CELL_PROJECTION_PART	55	-0.4968491	-2.0966272	0.0	0.008350546	0.03	66	tags=42%, list=17%, signal=43%
GO_PRESYNAPSE	18	-0.62575966	-1.9805341	0.0	0.02880312	0.123	102	tags=72%, list=26%, signal=93%
GO_SYNAPSE_PART	36	-0.5057442	-1.9560387	0.0	0.029921746	0.149	64	tags=47%, list=16%, signal=51%
GO_ENERGY_DERIVATION_BY_OXIDATION_OF_ORGANIC_COMPOUNDS	32	-0.518552	-1.9329691	0.0	0.034559775	0.192	125	tags=69%, list=32%, signal=93%
GO_NEURON_PART	76	-0.44052222	-1.9177214	0.0	0.03528762	0.217	86	tags=49%, list=22%, signal=50%
GO_MEMBRANE_PROTEIN_COMPLEX	56	-0.44873118	-1.8673233	0.0	0.048216194	0.309	134	tags=66%, list=34%, signal=86%
GO_CATALYTIC_COMPLEX	44	-0.47044477	-1.8627818	0.003508772	0.045846134	0.322	134	tags=64%, list=34%, signal=86%
GO_ELECTRON_TRANSPORT_CHAIN	18	-0.5858234	-1.8483778	0.005586592	0.048535515	0.366	125	tags=72%, list=32%, signal=101%
GO_SECRETORY_GRANULE	17	-0.58415	-1.8396003	0.008064516	0.04937052	0.392	58	tags=47%, list=15%, signal=53%
GO_ANION_TRANSPORT	21	-0.5447708	-1.8338442	0.0058479533	0.0487498	0.41	62	tags=52%, list=16%, signal=59%
GO_CELLULAR_PROTEIN_COMPLEX_ASSEMBLY	18	-0.5621216	-1.825473	0.002754821	0.049210984	0.44	129	tags=67%, list=33%, signal=95%
GO_NEURON_PROJECTION_MORPHOGENESIS	21	-0.55320686	-1.8238558	0.0055555557	0.046619676	0.444	74	tags=57%, list=19%, signal=67%
GO_CELL_MORPHOGENESIS_INVOLVED_IN_DIFFERENTIATION	22	-0.5492853	-1.8196787	0.0029498525	0.045387495	0.451	74	tags=59%, list=19%, signal=69%
GO_MITOCHONDRIAL_MEMBRANE_PART	28	-0.50474674	-1.8182516	0.003144654	0.043309785	0.456	133	tags=68%, list=34%, signal=96%
GO_OXIDOREDUCTASE_COMPLEX	17	-0.5854591	-1.8021057	0.008498584	0.04668072	0.494	130	tags=88%, list=33%, signal=127%
GO_MITOCHONDRIAL_PROTEIN_COMPLEX	26	-0.5151099	-1.8012993	0.005509642	0.044679716	0.499	152	tags=77%, list=39%, signal=118%
GO_CELL_PART_MORPHOGENESIS	25	-0.5274769	-1.7990874	0.0060790274	0.04349802	0.507	74	tags=52%, list=19%, signal=60%
GO_INNER_MITOCHONDRIAL_MEMBRANE_PROTEIN_COMPLEX	24	-0.5261367	-1.7944833	0.006024096	0.04293865	0.518	152	tags=79%, list=39%, signal=122%
GO_MITOCHONDRIAL_PART	97	-0.38414717	-1.7888058	0.0	0.04263412	0.529	133	tags=55%, list=34%, signal=62%
GO_CELL_PROJECTION_ORGANIZATION	36	-0.46092278	-1.7793975	0.006849315	0.04414255	0.554	82	tags=50%, list=21%, signal=57%
GO_SYNAPSE	44	-0.44272488	-1.7699637	0.0	0.044922933	0.58	64	tags=43%, list=16%, signal=46%
GO_AEROBIC_RESPIRATION	15	-0.60607594	-1.7503918	0.008333334	0.05065165	0.646	118	tags=80%, list=30%, signal=110%
GO_NEURON_PROJECTION	64	-0.41300035	-1.7482004	0.0	0.049415074	0.65	86	tags=47%, list=22%, signal=50%
GO_CELL_PROJECTION	88	-0.3855878	-1.7399447	0.0	0.051116537	0.672	70	tags=35%, list=18%, signal=33%
GO_CELL_MORPHOGENESIS_INVOLVED_IN_NEURON_DIFFERENTIATION	20	-0.5380337	-1.7291232	0.009259259	0.05374553	0.699	74	tags=60%, list=19%, signal=70%
GO_ORGANELLE_LOCALIZATION	27	-0.4937581	-1.7261765	0.005952381	0.052963343	0.707	74	tags=41%, list=19%, signal=47%
GO_ORGANELLE_INNER_MEMBRANE	62	-0.40192425	-1.720642	0.0	0.05404421	0.723	133	tags=60%, list=34%, signal=76%
GO_ION_TRANSPORT	52	-0.42211065	-1.7194486	0.0	0.05292649	0.725	52	tags=29%, list=13%, signal=29%
GO_MITOCHONDRION_ORGANIZATION	35	-0.45091236	-1.7169247	0.0069444445	0.052470278	0.73	108	tags=49%, list=28%, signal=61%
GO_NEURON_DEVELOPMENT	36	-0.44681007	-1.6815014	0.0031152647	0.06712117	0.817	82	tags=53%, list=21%, signal=61%
GO_MYELIN_SHEATH	57	-0.39253092	-1.67882	0.0	0.06653654	0.825	100	tags=49%, list=26%, signal=56%
GO_ORGANIC_ANION_TRANSPORT	17	-0.5431295	-1.6643896	0.019498607	0.07183905	0.857	62	tags=53%, list=16%, signal=60%
GO_REGULATION_OF_PROTEIN_POLYMERIZATION	17	-0.5481743	-1.6633343	0.025280898	0.07038741	0.857	60	tags=35%, list=15%, signal=40%
GO_VESICLE_ORGANIZATION	16	-0.5366692	-1.657058	0.032967035	0.071387984	0.862	42	tags=38%, list=11%, signal=40%
GO_AXON	31	-0.45925173	-1.6542699	0.012539185	0.07099375	0.867	86	tags=52%, list=22%, signal=61%
GO_REGULATION_OF_BODY_FLUID_LEVELS	16	-0.53826165	-1.6467848	0.023746701	0.072839536	0.88	47	tags=31%, list=12%, signal=34%
GO_GENERATION_OF_PRECURSOR_METABOLITES_AND_ENERGY	48	-0.40804094	-1.6316302	0.0068728523	0.078486964	0.907	125	tags=56%, list=32%, signal=73%
GO_NEURON_PROJECTION_DEVELOPMENT	29	-0.45101255	-1.6286001	0.02112676	0.07792344	0.911	82	tags=55%, list=21%, signal=65%
GO_REGULATION_OF_ION_TRANSPORT	20	-0.4983368	-1.623415	0.014367816	0.07859088	0.919	58	tags=40%, list=15%, signal=45%
GO_VESICLE_LOCALIZATION	15	-0.54485106	-1.6090149	0.023746701	0.08465631	0.935	58	tags=40%, list=15%, signal=45%
GO_MITOCHONDRIAL_ENVELOPE	69	-0.36111605	-1.5881829	0.0045871558	0.09614788	0.953	133	tags=55%, list=34%, signal=69%
GO_TRANSPORT_VESICLE	17	-0.51811165	-1.5804588	0.031700287	0.09894181	0.963	102	tags=65%, list=26%, signal=84%
GO_REGULATION_OF_CELLULAR_COMPONENT_SIZE	19	-0.4870641	-1.575582	0.03601108	0.10004508	0.965	61	tags=37%, list=16%, signal=42%
GO_CELLULAR_COMPONENT_MORPHOGENESIS	30	-0.4361111	-1.5714233	0.015873017	0.100835815	0.968	74	tags=47%, list=19%, signal=53%
GO_PROTEIN_DOMAIN_SPECIFIC_BINDING	29	-0.42771	-1.5459995	0.028037382	0.11661305	0.984	73	tags=38%, list=19%, signal=43%
GO_SOMATODENDRITIC_COMPARTMENT	41	-0.39220035	-1.5272449	0.014925373	0.12878114	0.99	86	tags=51%, list=22%, signal=59%
GO_MONOVALENT_INORGANIC_CATION_TRANSPORT	20	-0.46036038	-1.5211393	0.042042043	0.13138407	0.992	152	tags=65%, list=39%, signal=101%
GO_ENVELOPE	81	-0.33697417	-1.5052918	0.014354067	0.1428369	0.996	133	tags=53%, list=34%, signal=64%
GO_MODULATION_OF_SYNAPTIC_TRANSMISSION	23	-0.44615254	-1.5020534	0.04605263	0.14268191	0.996	55	tags=48%, list=14%, signal=52%
GO_NUCLEOBASE_CONTAINING_SMALL_MOLECULE_METABOLIC_PROCESS	53	-0.3552353	-1.4945127	0.029535865	0.14636126	0.997	153	tags=58%, list=39%, signal=83%
GO_AXON_PART	18	-0.48179817	-1.485782	0.045845274	0.15149616	0.998	86	tags=61%, list=22%, signal=75%
GO_PROTEIN_COMPLEX_SUBUNIT_ORGANIZATION	67	-0.34599572	-1.4824195	0.012244898	0.15159589	0.998	31	tags=16%, list=8%, signal=15%
GO_REGULATION_OF_ANATOMICAL_STRUCTURE_SIZE	22	-0.43568838	-1.4801073	0.05671642	0.15141566	0.998	61	tags=32%, list=16%, signal=36%
GO_REGULATION_OF_PROTEIN_COMPLEX_ASSEMBLY	26	-0.433318	-1.4633323	0.037037037	0.16587406	0.999	60	tags=35%, list=15%, signal=38%
GO_REGULATION_OF_CYTOPLASMIC_TRANSPORT	20	-0.4454897	-1.4610345	0.068249255	0.16515467	0.999	58	tags=40%, list=15%, signal=45%
GO_MOVEMENT_OF_CELL_OR_SUBCELLULAR_COMPONENT	55	-0.3534615	-1.4349713	0.015503876	0.18923666	1.0	79	tags=36%, list=20%, signal=39%
GO_NUCLEOSIDE_TRIPHOSPHATE_METABOLIC_PROCESS	41	-0.36400706	-1.4273136	0.031358887	0.1948385	1.0	153	tags=59%, list=39%, signal=86%
GO_CYTOSKELETAL_PROTEIN_BINDING	59	-0.33606616	-1.4234123	0.01632653	0.19628534	1.0	67	tags=32%, list=17%, signal=33%
GO_TRANSMEMBRANE_TRANSPORTER_ACTIVITY	36	-0.36969724	-1.4070716	0.06451613	0.21097736	1.0	152	tags=61%, list=39%, signal=91%
GO_DENDRITE	32	-0.37945694	-1.3958726	0.047169812	0.22082998	1.0	70	tags=44%, list=18%, signal=49%
GO_REGULATION_OF_SECRETION	28	-0.38737324	-1.3944675	0.07028754	0.21899934	1.0	42	tags=32%, list=11%, signal=33%
GO_REGULATION_OF_CYTOSKELETON_ORGANIZATION	28	-0.39488223	-1.3918859	0.07973422	0.21861829	1.0	24	tags=14%, list=6%, signal=14%
GO_NUCLEOSIDE_MONOPHOSPHATE_METABOLIC_PROCESS	40	-0.3643831	-1.3917582	0.06514658	0.21548975	1.0	153	tags=58%, list=39%, signal=85%
GO_PROTEIN_COMPLEX_BIOGENESIS	52	-0.3361228	-1.3793387	0.035019454	0.2282769	1.0	72	tags=27%, list=18%, signal=29%
GO_NEURON_DIFFERENTIATION	41	-0.34902453	-1.3696212	0.062893085	0.23835756	1.0	82	tags=49%, list=21%, signal=55%
GO_CELL_CELL_JUNCTION	15	-0.45388237	-1.3677915	0.11794872	0.23751417	1.0	37	tags=27%, list=9%, signal=28%
GO_INORGANIC_ION_TRANSMEMBRANE_TRANSPORT	22	-0.40932664	-1.3649546	0.075581394	0.23742576	1.0	152	tags=64%, list=39%, signal=98%
GO_POSTSYNAPSE	19	-0.42846572	-1.3596207	0.089918256	0.24123998	1.0	61	tags=42%, list=16%, signal=47%
GO_GOLGI_APPARATUS	38	-0.35428077	-1.3541276	0.054607507	0.24475606	1.0	64	tags=29%, list=16%, signal=31%
GO_EXOCYTOSIS	19	-0.41894805	-1.3454735	0.104395606	0.25230238	1.0	58	tags=37%, list=15%, signal=41%
GO_CYTOSKELETON_ORGANIZATION	38	-0.34809786	-1.3386247	0.08561644	0.25772735	1.0	66	tags=26%, list=17%, signal=29%
GO_REGULATION_OF_VESICLE_MEDIATED_TRANSPORT	24	-0.39434963	-1.3372703	0.11111111	0.25610077	1.0	42	tags=38%, list=11%, signal=39%
GO_REGULATION_OF_INTRACELLULAR_TRANSPORT	33	-0.3627451	-1.3212911	0.10429448	0.2741214	1.0	61	tags=33%, list=16%, signal=36%
GO_GOLGI_VESICLE_TRANSPORT	17	-0.42297968	-1.3153434	0.12753624	0.2794788	1.0	105	tags=35%, list=27%, signal=46%
GO_CELL_DEVELOPMENT	47	-0.32370543	-1.3082045	0.11721612	0.28628495	1.0	82	tags=43%, list=21%, signal=47%
GO_REGULATION_OF_PROTEIN_STABILITY	20	-0.39877692	-1.3066562	0.15	0.28479388	1.0	34	tags=25%, list=9%, signal=26%
GO_TUBULIN_BINDING	20	-0.3998626	-1.3034413	0.14447592	0.2855524	1.0	67	tags=35%, list=17%, signal=40%
GO_MITOCHONDRIAL_MATRIX	54	-0.31405288	-1.2970499	0.07421875	0.29095817	1.0	129	tags=54%, list=33%, signal=69%
GO_HYDROLASE_ACTIVITY_ACTING_ON_ACID_ANHYDRIDES	50	-0.31198114	-1.2814331	0.11278196	0.31187442	1.0	58	tags=20%, list=15%, signal=20%
GO_REGULATION_OF_CELLULAR_COMPONENT_BIOGENESIS	40	-0.3261831	-1.2785128	0.09698997	0.3126706	1.0	66	tags=28%, list=17%, signal=30%
GO_SECRETION_BY_CELL	26	-0.36302993	-1.2689899	0.14240506	0.32347625	1.0	58	tags=35%, list=15%, signal=38%
GO_KINASE_BINDING	37	-0.33533996	-1.2682478	0.13939394	0.32112905	1.0	22	tags=19%, list=6%, signal=18%
GO_RIBONUCLEOTIDE_BINDING	72	-0.28522736	-1.2642344	0.1146789	0.32320526	1.0	58	tags=21%, list=15%, signal=20%
GO_VESICLE_MEMBRANE	23	-0.3720566	-1.2620325	0.18443803	0.32239968	1.0	42	tags=22%, list=11%, signal=23%
GO_ACTIN_CYTOSKELETON	26	-0.36069036	-1.2597896	0.15286624	0.32255042	1.0	8	tags=15%, list=2%, signal=15%
GO_TRANSMEMBRANE_TRANSPORT	40	-0.32740745	-1.2578489	0.11824324	0.3218884	1.0	152	tags=58%, list=39%, signal=85%
GO_CELLULAR_RESPONSE_TO_NITROGEN_COMPOUND	20	-0.3880141	-1.2575318	0.13931888	0.31895652	1.0	81	tags=40%, list=21%, signal=48%
GO_NITROGEN_COMPOUND_TRANSPORT	26	-0.35845408	-1.2520449	0.14106584	0.32449207	1.0	77	tags=38%, list=20%, signal=45%
GO_ENDOMEMBRANE_SYSTEM_ORGANIZATION	22	-0.37401813	-1.2481046	0.15954416	0.32716367	1.0	58	tags=27%, list=15%, signal=30%
GO_GLYCOSYL_COMPOUND_METABOLIC_PROCESS	42	-0.32285875	-1.2458225	0.16433567	0.32732773	1.0	153	tags=55%, list=39%, signal=80%
GO_REGULATION_OF_CELL_MORPHOGENESIS_INVOLVED_IN_DIFFERENTIATION	16	-0.41960785	-1.245774	0.18316832	0.32392603	1.0	61	tags=31%, list=16%, signal=36%
GO_PURINE_CONTAINING_COMPOUND_METABOLIC_PROCESS	41	-0.32392094	-1.2428602	0.12915128	0.3251114	1.0	153	tags=56%, list=39%, signal=83%
GO_CATION_TRANSPORT	31	-0.34005275	-1.2401937	0.15384616	0.32619044	1.0	152	tags=58%, list=39%, signal=88%
GO_ACTIN_BINDING	27	-0.3522885	-1.2283235	0.18354431	0.34143692	1.0	7	tags=15%, list=2%, signal=14%
GO_SECRETION	28	-0.33827716	-1.2224188	0.19426751	0.34734905	1.0	58	tags=32%, list=15%, signal=35%
GO_ADENYL_NUCLEOTIDE_BINDING	50	-0.2976145	-1.221086	0.10600707	0.3463411	1.0	58	tags=24%, list=15%, signal=25%
GO_TRANSPORTER_ACTIVITY	45	-0.292008	-1.2062236	0.13483146	0.3676067	1.0	62	tags=22%, list=16%, signal=23%
GO_ATPASE_ACTIVITY	23	-0.3595192	-1.2024927	0.20348836	0.37010956	1.0	24	tags=17%, list=6%, signal=17%
GO_CATION_TRANSMEMBRANE_TRANSPORTER_ACTIVITY	21	-0.3652949	-1.1980857	0.1993865	0.37445882	1.0	49	tags=19%, list=13%, signal=21%
GO_REGULATION_OF_TRANSPORT	70	-0.27264574	-1.19358	0.14	0.37896937	1.0	61	tags=27%, list=16%, signal=26%
GO_POSITIVE_REGULATION_OF_ORGANELLE_ORGANIZATION	32	-0.32301447	-1.1861391	0.17333333	0.3888858	1.0	13	tags=13%, list=3%, signal=12%
GO_CYTOPLASMIC_VESICLE_PART	30	-0.3252162	-1.1647831	0.23548387	0.42565593	1.0	73	tags=27%, list=19%, signal=30%
GO_SMALL_GTPASE_MEDIATED_SIGNAL_TRANSDUCTION	19	-0.36557853	-1.1647288	0.21637426	0.4218412	1.0	47	tags=16%, list=12%, signal=17%
GO_INORGANIC_CATION_TRANSMEMBRANE_TRANSPORTER_ACTIVITY	21	-0.36529493	-1.1631933	0.25895315	0.42064488	1.0	49	tags=19%, list=13%, signal=21%
GO_REGULATION_OF_ORGANELLE_ORGANIZATION	57	-0.27702942	-1.1603314	0.19767442	0.4224816	1.0	24	tags=12%, list=6%, signal=11%
GO_GTPASE_ACTIVITY	21	-0.35357887	-1.1547675	0.23876405	0.42834944	1.0	142	tags=52%, list=36%, signal=78%
GO_REGULATION_OF_MEMBRANE_POTENTIAL	17	-0.37712768	-1.1545565	0.2554945	0.42495582	1.0	57	tags=47%, list=15%, signal=53%
GO_GTPASE_BINDING	15	-0.38306916	-1.1538349	0.27040815	0.42250434	1.0	64	tags=33%, list=16%, signal=38%
GO_CELL_LEADING_EDGE	23	-0.343186	-1.1530215	0.2861635	0.42002824	1.0	19	tags=13%, list=5%, signal=13%
GO_METAL_ION_TRANSPORT	16	-0.38073808	-1.1525198	0.25753424	0.4172208	1.0	111	tags=50%, list=28%, signal=67%
GO_ACTIN_FILAMENT_BASED_PROCESS	27	-0.32150385	-1.1426196	0.26345608	0.4318239	1.0	66	tags=26%, list=17%, signal=29%
GO_VESICLE_MEDIATED_TRANSPORT	58	-0.26865327	-1.1314217	0.21212122	0.4512879	1.0	64	tags=24%, list=16%, signal=25%
GO_BEHAVIOR	21	-0.34029818	-1.1301119	0.26345608	0.44997975	1.0	82	tags=52%, list=21%, signal=63%
GO_PROTEIN_COMPLEX_BINDING	60	-0.26480934	-1.1252238	0.23404256	0.4557467	1.0	67	tags=25%, list=17%, signal=26%
GO_ORGANOPHOSPHATE_METABOLIC_PROCESS	58	-0.26308954	-1.110722	0.25882354	0.4804188	1.0	153	tags=55%, list=39%, signal=77%
GO_MICROTUBULE	22	-0.33186144	-1.1044439	0.25297618	0.48902106	1.0	67	tags=32%, list=17%, signal=36%
GO_MITOCHONDRION	132	-0.23187393	-1.0986063	0.22516556	0.49687752	1.0	138	tags=47%, list=35%, signal=48%
GO_MEMBRANE_REGION	41	-0.27913454	-1.086837	0.3240418	0.5171652	1.0	52	tags=20%, list=13%, signal=20%
GO_PROTEIN_STABILIZATION	17	-0.34726518	-1.0837091	0.3511236	0.51972663	1.0	55	tags=29%, list=14%, signal=33%
GO_ENZYME_BINDING	93	-0.23515122	-1.0826406	0.27979276	0.5178898	1.0	26	tags=13%, list=7%, signal=11%
GO_HYDROGEN_TRANSPORT	15	-0.35144186	-1.0653801	0.35422343	0.55122715	1.0	168	tags=73%, list=43%, signal=124%
GO_CELL_BODY	32	-0.28859624	-1.0610571	0.35603714	0.5564694	1.0	86	tags=47%, list=22%, signal=55%
GO_DICARBOXYLIC_ACID_METABOLIC_PROCESS	16	-0.35222504	-1.0536512	0.3669468	0.56852	1.0	103	tags=63%, list=26%, signal=81%
GO_ION_TRANSMEMBRANE_TRANSPORT	30	-0.29713267	-1.0474548	0.40189874	0.5783186	1.0	152	tags=57%, list=39%, signal=86%
GO_HEXOSE_METABOLIC_PROCESS	20	-0.32043454	-1.0448089	0.35261708	0.579645	1.0	91	tags=40%, list=23%, signal=49%
GO_CELLULAR_COMPONENT_DISASSEMBLY	18	-0.3305738	-1.0434777	0.39304814	0.57851434	1.0	16	tags=17%, list=4%, signal=17%
GO_CELLULAR_RESPONSE_TO_HORMONE_STIMULUS	18	-0.33577716	-1.0423174	0.40159574	0.57651985	1.0	88	tags=50%, list=23%, signal=62%
GO_GLUCOSE_METABOLIC_PROCESS	20	-0.32043454	-1.0418636	0.4140845	0.5732104	1.0	91	tags=40%, list=23%, signal=49%
GO_MONOVALENT_INORGANIC_CATION_TRANSMEMBRANE_TRANSPORTER_ACTIVITY	18	-0.3298285	-1.036976	0.37428573	0.5797532	1.0	152	tags=56%, list=39%, signal=87%
GO_HYDROGEN_ION_TRANSMEMBRANE_TRANSPORT	15	-0.35144186	-1.0183288	0.41597795	0.6185691	1.0	168	tags=73%, list=43%, signal=124%
GO_NEGATIVE_REGULATION_OF_CYTOSKELETON_ORGANIZATION	15	-0.34287322	-1.0152546	0.4394366	0.6209661	1.0	55	tags=20%, list=14%, signal=22%
GO_MEMBRANE_MICRODOMAIN	18	-0.3217222	-1.0066357	0.44668588	0.6364776	1.0	52	tags=28%, list=13%, signal=31%
GO_INTRACELLULAR_VESICLE	68	-0.22653878	-0.99605894	0.47619048	0.6568339	1.0	66	tags=22%, list=17%, signal=22%
GO_CARBOHYDRATE_BIOSYNTHETIC_PROCESS	15	-0.33005401	-0.9914842	0.46478873	0.662322	1.0	91	tags=40%, list=23%, signal=50%
GO_LOCOMOTION	40	-0.25454542	-0.983915	0.48630136	0.6759934	1.0	70	tags=33%, list=18%, signal=36%
GO_CELL_PROJECTION_MEMBRANE	15	-0.3388217	-0.9831035	0.49357328	0.67306644	1.0	47	tags=20%, list=12%, signal=22%
GO_OXIDOREDUCTASE_ACTIVITY_ACTING_ON_CH_OH_GROUP_OF_DONORS	18	-0.31828758	-0.9775677	0.4744318	0.6814508	1.0	147	tags=50%, list=38%, signal=77%
GO_MONOSACCHARIDE_BIOSYNTHETIC_PROCESS	15	-0.33005404	-0.97688687	0.48579547	0.6784936	1.0	91	tags=40%, list=23%, signal=50%
GO_COFACTOR_METABOLIC_PROCESS	30	-0.26821706	-0.9749044	0.46885246	0.67852706	1.0	109	tags=40%, list=28%, signal=51%
GO_DIVALENT_INORGANIC_CATION_HOMEOSTASIS	16	-0.32923356	-0.9741543	0.4679666	0.6757456	1.0	19	tags=25%, list=5%, signal=25%
GO_SMALL_MOLECULE_METABOLIC_PROCESS	105	-0.20929533	-0.97249943	0.5418719	0.6749844	1.0	133	tags=41%, list=34%, signal=45%
GO_NEGATIVE_REGULATION_OF_ORGANELLE_ORGANIZATION	19	-0.30323446	-0.9723545	0.48433048	0.6707556	1.0	24	tags=16%, list=6%, signal=16%
GO_MICROTUBULE_BASED_PROCESS	24	-0.28540832	-0.96100086	0.5341246	0.6927777	1.0	74	tags=25%, list=19%, signal=29%
GO_OXIDOREDUCTASE_ACTIVITY_ACTING_ON_THE_CH_OH_GROUP_OF_DONORS_NAD_OR_NADP_AS_ACCEPTOR	17	-0.30190182	-0.94474566	0.4919355	0.7268441	1.0	147	tags=47%, list=38%, signal=72%
GO_INTRACELLULAR_SIGNAL_TRANSDUCTION	52	-0.23516554	-0.94437253	0.5568182	0.7227547	1.0	67	tags=21%, list=17%, signal=22%
GO_GOLGI_APPARATUS_PART	17	-0.30661306	-0.931491	0.5853018	0.7477029	1.0	105	tags=41%, list=27%, signal=54%
GO_PHOSPHOLIPID_BINDING	18	-0.28626826	-0.92643553	0.55737704	0.7547093	1.0	55	tags=33%, list=14%, signal=37%
GO_ORGANIC_ACID_METABOLIC_PROCESS	66	-0.21270207	-0.92597586	0.6889764	0.75087976	1.0	110	tags=35%, list=28%, signal=40%
GO_MONOSACCHARIDE_METABOLIC_PROCESS	22	-0.2729004	-0.9236666	0.5833333	0.7512304	1.0	91	tags=36%, list=23%, signal=45%
GO_OXIDOREDUCTASE_ACTIVITY	56	-0.2197704	-0.91704524	0.654902	0.7618806	1.0	130	tags=45%, list=33%, signal=57%
GO_SMALL_MOLECULE_BIOSYNTHETIC_PROCESS	33	-0.24763814	-0.91519725	0.60126585	0.7612557	1.0	91	tags=33%, list=23%, signal=40%
GO_MACROMOLECULAR_COMPLEX_BINDING	69	-0.20851275	-0.910325	0.6052632	0.76687074	1.0	67	tags=22%, list=17%, signal=22%
GO_RESPONSE_TO_INORGANIC_SUBSTANCE	24	-0.25887978	-0.903424	0.60897434	0.7772993	1.0	82	tags=33%, list=21%, signal=40%
GO_CELLULAR_MACROMOLECULAR_COMPLEX_ASSEMBLY	32	-0.24009712	-0.9007773	0.62711865	0.7781767	1.0	12	tags=9%, list=3%, signal=9%
GO_COENZYME_METABOLIC_PROCESS	29	-0.24743092	-0.9004766	0.61011904	0.7739254	1.0	109	tags=38%, list=28%, signal=49%
GO_CARBOHYDRATE_DERIVATIVE_METABOLIC_PROCESS	50	-0.22013956	-0.89106405	0.660066	0.7892418	1.0	133	tags=42%, list=34%, signal=56%
GO_POSITIVE_REGULATION_OF_CELLULAR_COMPONENT_BIOGENESIS	18	-0.28046593	-0.8892479	0.59117645	0.7880209	1.0	66	tags=22%, list=17%, signal=26%
GO_CARBOHYDRATE_METABOLIC_PROCESS	35	-0.23239438	-0.8827097	0.65495205	0.79702216	1.0	109	tags=37%, list=28%, signal=47%
GO_TRANSITION_METAL_ION_BINDING	16	-0.28235295	-0.8817672	0.6327078	0.79419655	1.0	118	tags=44%, list=30%, signal=60%
GO_PYRUVATE_METABOLIC_PROCESS	16	-0.2899465	-0.8806254	0.6123595	0.79157513	1.0	109	tags=44%, list=28%, signal=58%
GO_RESPONSE_TO_WOUNDING	18	-0.2842542	-0.87980044	0.64705884	0.7885413	1.0	66	tags=28%, list=17%, signal=32%
GO_NEGATIVE_REGULATION_OF_CELL_COMMUNICATION	36	-0.2331744	-0.8773924	0.6918239	0.7883566	1.0	30	tags=14%, list=8%, signal=14%
GO_OXIDOREDUCTION_COENZYME_METABOLIC_PROCESS	22	-0.2562307	-0.8701445	0.69337016	0.79850245	1.0	109	tags=41%, list=28%, signal=54%
GO_SUPRAMOLECULAR_FIBER	30	-0.24065654	-0.8685337	0.6967742	0.7971159	1.0	67	tags=30%, list=17%, signal=33%
GO_MACROMOLECULAR_COMPLEX_ASSEMBLY	66	-0.20249507	-0.862655	0.76033056	0.80346894	1.0	31	tags=12%, list=8%, signal=11%
GO_PHOSPHORYLATION	48	-0.20766802	-0.8529376	0.7490494	0.81756026	1.0	90	tags=29%, list=23%, signal=33%
GO_PROTEIN_C_TERMINUS_BINDING	16	-0.2761736	-0.8512274	0.66760564	0.8161102	1.0	42	tags=19%, list=11%, signal=20%
GO_PLASMA_MEMBRANE_REGION	25	-0.24640413	-0.8339372	0.69745225	0.84367	1.0	19	tags=12%, list=5%, signal=12%
GO_GOLGI_MEMBRANE	16	-0.26235822	-0.8073829	0.7237569	0.8853048	1.0	105	tags=38%, list=27%, signal=49%
GO_REGULATION_OF_HYDROLASE_ACTIVITY	32	-0.20952222	-0.7855456	0.8145897	0.91560555	1.0	55	tags=22%, list=14%, signal=23%
GO_PROTEIN_HOMOOLIGOMERIZATION	16	-0.2526738	-0.76945686	0.7978437	0.93428385	1.0	72	tags=25%, list=18%, signal=29%
GO_NEGATIVE_REGULATION_OF_INTRACELLULAR_SIGNAL_TRANSDUCTION	15	-0.2618528	-0.7682693	0.7830986	0.93074	1.0	88	tags=33%, list=23%, signal=41%
GO_CARBOHYDRATE_DERIVATIVE_BIOSYNTHETIC_PROCESS	22	-0.2228261	-0.7499448	0.8753799	0.9507983	1.0	309	tags=100%, list=79%, signal=454%
GO_NUCLEAR_OUTER_MEMBRANE_ENDOPLASMIC_RETICULUM_MEMBRANE_NETWORK	34	-0.19382022	-0.74660164	0.86013985	0.9498451	1.0	322	tags=100%, list=83%, signal=524%
GO_MICROTUBULE_CYTOSKELETON	41	-0.18710364	-0.7305885	0.9141914	0.9650713	1.0	67	tags=22%, list=17%, signal=24%
GO_SIDE_OF_MEMBRANE	16	-0.23644002	-0.72061336	0.8333333	0.970963	1.0	82	tags=38%, list=21%, signal=46%
GO_SULFUR_COMPOUND_METABOLIC_PROCESS	15	-0.2430422	-0.7172697	0.8575342	0.9693976	1.0	106	tags=40%, list=27%, signal=53%
GO_RESPONSE_TO_OXIDATIVE_STRESS	23	-0.2116984	-0.71266425	0.8973607	0.9689649	1.0	82	tags=30%, list=21%, signal=36%
GO_NUCLEOSIDE_PHOSPHATE_BIOSYNTHETIC_PROCESS	17	-0.22723664	-0.7066875	0.87534624	0.9701708	1.0	170	tags=71%, list=44%, signal=120%
GO_OXIDATION_REDUCTION_PROCESS	74	-0.16078295	-0.70255214	0.9752066	0.9689477	1.0	130	tags=41%, list=33%, signal=49%
GO_NUCLEOTIDE_PHOSPHORYLATION	15	-0.23139392	-0.6951878	0.8746667	0.9706664	1.0	83	tags=27%, list=21%, signal=33%
GO_REGULATION_OF_GROWTH	15	-0.22849996	-0.69497216	0.8821918	0.9656453	1.0	102	tags=47%, list=26%, signal=61%
GO_ORGANOPHOSPHATE_BIOSYNTHETIC_PROCESS	21	-0.20867209	-0.6817654	0.9093484	0.9721479	1.0	314	tags=100%, list=81%, signal=486%
GO_PHOSPHATE_CONTAINING_COMPOUND_METABOLIC_PROCESS	77	-0.15019199	-0.6813	0.9790576	0.9674231	1.0	133	tags=39%, list=34%, signal=47%
GO_RESPONSE_TO_TOXIC_SUBSTANCE	18	-0.21513397	-0.67729545	0.89855075	0.9654075	1.0	62	tags=28%, list=16%, signal=32%
GO_NUCLEOSIDE_DIPHOSPHATE_METABOLIC_PROCESS	15	-0.23139392	-0.676612	0.9088542	0.96086884	1.0	83	tags=27%, list=21%, signal=33%
GO_NADH_METABOLIC_PROCESS	15	-0.22420515	-0.6723629	0.8774929	0.95908725	1.0	95	tags=33%, list=24%, signal=42%
GO_CELLULAR_AMINO_ACID_METABOLIC_PROCESS	20	-0.21176471	-0.668788	0.9003021	0.95693487	1.0	81	tags=30%, list=21%, signal=36%
GO_GLYCOSYL_COMPOUND_BIOSYNTHETIC_PROCESS	15	-0.21866666	-0.65236586	0.8962025	0.9638464	1.0	309	tags=100%, list=79%, signal=463%
GO_POSITIVE_REGULATION_OF_INTRACELLULAR_TRANSPORT	15	-0.19979744	-0.61841106	0.9423077	0.97772163	1.0	42	tags=13%, list=11%, signal=14%
GO_NAD_METABOLIC_PROCESS	17	-0.19876377	-0.60620445	0.92774564	0.9785452	1.0	109	tags=35%, list=28%, signal=47%
GO_SINGLE_ORGANISM_BIOSYNTHETIC_PROCESS	61	-0.13509874	-0.571179	0.99593496	0.986047	1.0	91	tags=23%, list=23%, signal=25%
GO_MONOCARBOXYLIC_ACID_METABOLIC_PROCESS	43	-0.13818789	-0.54778016	0.9966443	0.9869074	1.0	89	tags=21%, list=23%, signal=24%

## Sheet: Enrichmentmap_nodes
SUID	__mclCluster	EM1_Colouring (Data Set 1)	EM1_ES (Data Set 1)	EM1_fdr_qvalue (Data Set 1)	EM1_Formatted_name	EM1_fwer_qvalue (Data Set 1)	EM1_Genes	EM1_GS_DESCR	EM1_gs_size	EM1_GS_Type	EM1_Name	EM1_NES (Data Set 1)	EM1_pvalue (Data Set 1)	name	selected	shared name
62	1	1.0	0.6939735	0.0036089767	GO_LARGE_ RIBOSOMAL_ SUBUNIT	0.155	RPL22|RPL23|RPL7|RPL19|RPL21|RPLP0|RPL15|RPL13A|RPL27|RPL12|RPL6|RPL10A|RPL11|RPL18|RPL26|RPLP2|RPL31	http://www.broadinstitute.org/gsea/msigdb/cards/GO_LARGE_RIBOSOMAL_SUBUNIT	17	ENR	GO_LARGE_RIBOSOMAL_SUBUNIT	1.8948611	0.0	GO_LARGE_RIBOSOMAL_SUBUNIT	false	GO_LARGE_RIBOSOMAL_SUBUNIT
63	2	-1.0	-0.41300035	0.049415074	GO_NEURON_ PROJECTION	0.65	STMN1|VIM|SYN1|GNAQ|GNB1|APOE|SNCA|SNCB|VAMP2|SLC6A1|STX1A|MYO5A|STXBP1|SYT1|CTNNB1|SLC1A3|ITGB1|SOD1|DPYSL3|GARS|SV2A|CLIP2|RAB7A|HNRNPK|MARCKS|GOT1|SYNCRIP|STMN2|CALB1|DBN1|MAPT|PPP1CC|L1CAM|CANX|UCHL1|GPM6A|MAP1B|HSP90AA1|PFN2|ATP2B1|GAP43|MYH10|PPP1R9B|OPA1|NSF|ATP1A3|ARPC2|ARF1|PFN1|MPST|KHSRP|DPYSL5|YWHAE|MTPN|NCDN|GDI1|TUBB3|DCX|HMGB1|HNRNPA3|GNAO1|ABAT|ALCAM|RPS6	http://www.broadinstitute.org/gsea/msigdb/cards/GO_NEURON_PROJECTION	64	ENR	GO_NEURON_PROJECTION	-1.7482004	0.0	GO_NEURON_PROJECTION	false	GO_NEURON_PROJECTION
64	1	1.0	0.73013103	2.696969E-4	GO_MRNA_BINDING	0.01	RPS2|HNRNPK|RPS13|RPL7|SYNCRIP|RPL13A|ELAVL1|KHSRP|HNRNPD|HNRNPA2B1|RPS5|HSP90AA1|RPS3|HNRNPC|HNRNPA3|C1QBP|NCL|RPS14	http://www.broadinstitute.org/gsea/msigdb/cards/GO_MRNA_BINDING	18	ENR	GO_MRNA_BINDING	2.0724757	0.0	GO_MRNA_BINDING	false	GO_MRNA_BINDING
65	1	1.0	0.661038	0.0	GO_NCRNA_ METABOLIC_ PROCESS	0.0	RPS2|HSD17B10|RPS19|RPL12|RPL6|RPL11|RPS17|RPS5|RPS29|RPS3|GARS|RPS7|RPL22|RPL23|RPS3A|RPS15A|RPS13|RPL7|RPL19|RPL21|RPLP0|RPS11|RPL15|RPL27|RPL13A|RPS12|RPS25|RPS4X|RPL10A|RPS18|HNRNPA2B1|RPL18|RPS16|RPSA|RPL26|RPS23|RPLP2|RPL31|RPS8|RPS9|RPS14|RPS6	http://www.broadinstitute.org/gsea/msigdb/cards/GO_NCRNA_METABOLIC_PROCESS	42	ENR	GO_NCRNA_METABOLIC_PROCESS	2.1894245	0.0	GO_NCRNA_METABOLIC_PROCESS	false	GO_NCRNA_METABOLIC_PROCESS
66	2	-1.0	-0.6572873	0.017414501	GO_SYNAPTIC_ SIGNALING	0.013	RAC1|SYN1|GNAQ|GNB1|HSPA8|APOE|SNCA|SNCB|GLS|STX1B|RTN3|VAMP2|SLC6A1|STX1A|MYO5A|STXBP1|SYT1|CTNNB1|VDAC1|CADPS|SNAP91|SLC1A3	http://www.broadinstitute.org/gsea/msigdb/cards/GO_SYNAPTIC_SIGNALING	22	ENR	GO_SYNAPTIC_SIGNALING	-2.1815882	0.0	GO_SYNAPTIC_SIGNALING	false	GO_SYNAPTIC_SIGNALING
67	1	1.0	0.49243584	0.007839681	GO_ ORGANONITROGEN_ COMPOUND_ BIOSYNTHETIC_ PROCESS	0.319	ATP5B|SNCA|GLS|EIF5A|ATP5H|DCAKD|CMPK1|ATP5I|RPS19|ATP5L|ATP5O|ATP5J2|ATP5A1|SLC1A3|ATP5D|EEF2|ATP5F1|ATPIF1|GARS|ALDOA|SLC25A3|GSTP1|SLC25A1|RPL13A|RPSA|RPS14|GLUD1|TUFM|RPS2|EEF1A1|GOT1|SLC25A4|EIF3C|RPL12|RPL6|RPL11|RPS17|EIF3A|RPS5|OAT|RPS29|RPS3|PABPC1|VAPA|RPS7|GSTA3|NME2|RPL22|RPL23|AK1|RPS3A|RPS15A|RPS13|RPL7|RPL19|RPL21|RPLP0|RPS11|RPL15|RPL27|RPS12|RPS25|RPS4X|RPL10A|RPS18|RPL18|GOT2|RP…	http://www.broadinstitute.org/gsea/msigdb/cards/GO_ORGANONITROGEN_COMPOUND_BIOSYNTHETIC_PROCESS	78	ENR	GO_ORGANONITROGEN_COMPOUND_BIOSYNTHETIC_PROCESS	1.8395846	0.0	GO_ORGANONITROGEN_COMPOUND_BIOSYNTHETIC_PROCESS	false	GO_ORGANONITROGEN_COMPOUND_BIOSYNTHETIC_PROCESS
68	1	1.0	0.6327946	1.1835558E-4	GO_STRUCTURAL_ CONSTITUENT_OF_ RIBOSOME	0.004	RPS2|SLC25A4|RPS19|RPL12|RPL6|RPL11|RPS17|RPS5|RPS29|RPS3|RPS7|RPL22|RPL23|RPS3A|RPS15A|RPS13|SLC25A3|RPL7|RPL19|SLC25A1|RPL21|RPLP0|RPS11|RPL15|RPL13A|RPL27|RPS12|RPS4X|RPL10A|RPS18|RPL18|RPS16|RPL26|RPSA|RPS23|RPLP2|RPL31|RPS8|RPS9|RPS6|RPS14	http://www.broadinstitute.org/gsea/msigdb/cards/GO_STRUCTURAL_CONSTITUENT_OF_RIBOSOME	41	ENR	GO_STRUCTURAL_CONSTITUENT_OF_RIBOSOME	2.0988126	0.0	GO_STRUCTURAL_CONSTITUENT_OF_RIBOSOME	false	GO_STRUCTURAL_CONSTITUENT_OF_RIBOSOME
69	1	1.0	0.6768963	0.0	GO_ESTABLISHMENT_ OF_PROTEIN_ LOCALIZATION_TO_ ENDOPLASMIC_ RETICULUM	0.0	RPS2|RPS19|RPL12|RPL6|RPL11|RPS17|RPS5|RPS29|RPS3|RPS7|RPL22|RPL23|RPS3A|RPS15A|RPS13|RPL7|RPL19|RPL21|RPLP0|RPS11|RPL15|RPL27|RPL13A|RPS12|RPS25|RPS4X|RPL10A|RPS18|RPL18|RPS16|RPL26|RPSA|RPS23|RPLP2|RPL31|RPS8|RPS9|RPS14|RPS6	http://www.broadinstitute.org/gsea/msigdb/cards/GO_ESTABLISHMENT_OF_PROTEIN_LOCALIZATION_TO_ENDOPLASMIC_RETICULUM	39	ENR	GO_ESTABLISHMENT_OF_PROTEIN_LOCALIZATION_TO_ENDOPLASMIC_RETICULUM	2.265229	0.0	GO_ESTABLISHMENT_OF_PROTEIN_LOCALIZATION_TO_ENDOPLASMIC_RETICULUM	false	GO_ESTABLISHMENT_OF_PROTEIN_LOCALIZATION_TO_ENDOPLASMIC_RETICULUM
70	1	1.0	0.64731133	0.0	GO_MACROMOLECULE_ CATABOLIC_ PROCESS	0.0	APOE|HSP90B1|RPS19|VCP|CTNNB1|UBE2N|UBA1|PSMB6|SKP1|RAB7A|RPL13A|KPNB1|HNRNPD|RPSA|CTSB|RPS14|CTSD|RPS2|PSMB5|PSMA1|PSMA2|PSMD2|PSMB4|PSMA6|RPL12|RPL6|RPL11|RPS17|UCHL1|RPS5|RPS29|RPS3|PABPC1|RPS7|RPL22|RPL23|RPS3A|RPS15A|RPS13|RPL7|RPL19|RPL21|RPLP0|GAA|RPS11|RPL15|RPL27|RPS12|RPS25|KHSRP|RPS4X|RPL10A|RPS18|RPL18|RPS16|RPL26|RPS23|RPLP2|RPL31|RPS8|HMGB1|RPS9|RPS6	http://www.broadinstitute.org/gsea/msigdb/cards/GO_MACROMOLECULE_CATABOLIC_PROCESS	63	ENR	GO_MACROMOLECULE_CATABOLIC_PROCESS	2.3715723	0.0	GO_MACROMOLECULE_CATABOLIC_PROCESS	false	GO_MACROMOLECULE_CATABOLIC_PROCESS
71		1.0	0.5491201	0.011120177	GO_EXTRACELLULAR_ SPACE	0.459	TPI1|MDH1|CTSD|EEF1A1|PRDX6|HSPA8|CST3|APOE|SNCA|RTN3|PPIA|TST|B2M|ASAH1|KRT10|SOD1|DPYSL3|PTN|CFL1|ALDOA|HSPD1|LAMP2|ANXA2|ALB|PSAP|MFGE8|HBA1|GSTP1|TPT1|HBB|ENO2|PFN1|PRDX1|MIF|CKB|HMGB1|CTSB|C1QBP	http://www.broadinstitute.org/gsea/msigdb/cards/GO_EXTRACELLULAR_SPACE	38	ENR	GO_EXTRACELLULAR_SPACE	1.8063837	0.0	GO_EXTRACELLULAR_SPACE	false	GO_EXTRACELLULAR_SPACE
72	1	1.0	0.66076976	0.0	GO_ RIBONUCLEOPROTEIN_ COMPLEX_ BIOGENESIS	0.0	RPS2|NPM1|RPS19|EIF3C|RPL12|RPL6|RPL11|RPS17|EIF3A|RPS5|RPS29|RPS3|RPS7|RPL22|DYNC1H1|RPL23|RAN|XPO1|RPS3A|RPS15A|RPS13|RPL7|RPL19|RPL21|RPLP0|RPS11|RPL15|RPL27|RPL13A|RPS12|RPS25|RPS4X|RPL10A|RPS18|RPL18|RPS16|RPSA|RPL26|RPS23|RPLP2|RPL31|RPS8|RPS9|C1QBP|RPS14|RPS6	http://www.broadinstitute.org/gsea/msigdb/cards/GO_RIBONUCLEOPROTEIN_COMPLEX_BIOGENESIS	46	ENR	GO_RIBONUCLEOPROTEIN_COMPLEX_BIOGENESIS	2.2651565	0.0	GO_RIBONUCLEOPROTEIN_COMPLEX_BIOGENESIS	false	GO_RIBONUCLEOPROTEIN_COMPLEX_BIOGENESIS
73	2	-1.0	-0.5057442	0.029921746	GO_SYNAPSE_PART	0.149	SYN1|HNRNPK|HSPA8|MARCKS|SNCA|SNCB|STX1B|CALB1|VAMP2|MAPT|STX1A|PPP1CC|STXBP1|SYT1|RTN4|VDAC1|CANX|CADPS|GPM6A|SLC1A3|MAP1B|RAB11B|ITGB1|PFN2|VDAC2|ATP2B1|DCLK1|GAP43|SV2A|MYH10|PPP1R9B|NSF|RAB7A|ATP1A3|ERC1|ARF1	http://www.broadinstitute.org/gsea/msigdb/cards/GO_SYNAPSE_PART	36	ENR	GO_SYNAPSE_PART	-1.9560387	0.0	GO_SYNAPSE_PART	false	GO_SYNAPSE_PART
74	2	-1.0	-0.44272488	0.044922933	GO_SYNAPSE	0.58	SYN1|HNRNPK|MARCKS|HSPA8|SNCA|SNCB|ATP2A2|STX1B|CALB1|VAMP2|MAPT|STX1A|PPP1CC|STXBP1|RTN4|SYT1|CTNNB1|VDAC1|CANX|CADPS|GPM6A|SLC1A3|MAP1B|RAB11B|ITGB1|CDH2|PFN2|VDAC2|ATP2B1|DCLK1|SV2A|GAP43|PTN|MYH10|PPP1R9B|NSF|ATP1A3|RAB7A|ARPC2|ERC1|ARF1|PFN1|MPST|WASF1	http://www.broadinstitute.org/gsea/msigdb/cards/GO_SYNAPSE	44	ENR	GO_SYNAPSE	-1.7699637	0.0	GO_SYNAPSE	false	GO_SYNAPSE
75	1	1.0	0.67014897	0.0	GO_NUCLEAR_ TRANSCRIBED_MRNA_ CATABOLIC_ PROCESS_NONSENSE_ MEDIATED_DECAY	0.0	RPS2|RPS19|RPL12|RPL6|RPL11|RPS17|RPS5|RPS29|RPS3|PABPC1|RPS7|RPL22|RPL23|RPS3A|RPS15A|RPS13|RPL7|RPL19|RPL21|RPLP0|RPS11|RPL15|RPL27|RPL13A|RPS12|RPS25|RPS4X|RPL10A|RPS18|RPL18|RPS16|RPL26|RPSA|RPS23|RPLP2|RPL31|RPS8|RPS9|RPS14|RPS6	http://www.broadinstitute.org/gsea/msigdb/cards/GO_NUCLEAR_TRANSCRIBED_MRNA_CATABOLIC_PROCESS_NONSENSE_MEDIATED_DECAY	40	ENR	GO_NUCLEAR_TRANSCRIBED_MRNA_CATABOLIC_PROCESS_NONSENSE_MEDIATED_DECAY	2.2099304	0.0	GO_NUCLEAR_TRANSCRIBED_MRNA_CATABOLIC_PROCESS_NONSENSE_MEDIATED_DECAY	false	GO_NUCLEAR_TRANSCRIBED_MRNA_CATABOLIC_PROCESS_NONSENSE_MEDIATED_DECAY
76	1	1.0	0.68505275	0.0	GO_MULTI_ORGANISM_ METABOLIC_ PROCESS	0.0	RPS2|RPS19|RPL12|RPL6|RPL11|RPS17|EIF3A|RPS5|RPS29|RPS3|RPS7|RPL22|RPL23|RPS3A|RPS15A|RPS13|RPL7|RPL19|RPL21|RPLP0|RPS11|RPL15|RPL13A|RPL27|RPS12|RPS25|RPS4X|RPL10A|RPS18|RPL18|RPS16|RPSA|RPL26|RPS23|RPLP2|RPL31|RPS8|RPS9|RPS6|RPS14	http://www.broadinstitute.org/gsea/msigdb/cards/GO_MULTI_ORGANISM_METABOLIC_PROCESS	40	ENR	GO_MULTI_ORGANISM_METABOLIC_PROCESS	2.2525897	0.0	GO_MULTI_ORGANISM_METABOLIC_PROCESS	false	GO_MULTI_ORGANISM_METABOLIC_PROCESS
77	1	1.0	0.60228115	1.2745985E-4	GO_AMIDE_ BIOSYNTHETIC_ PROCESS	0.004	EIF5A|RPS19|EEF2|ATPIF1|GARS|SLC25A3|SLC25A1|RPL13A|RPSA|RPS14|TUFM|EEF1A1|RPS2|SLC25A4|EIF3C|RPL12|RPL6|RPL11|RPS17|EIF3A|RPS5|RPS29|RPS3|PABPC1|RPS7|RPL22|RPL23|RPS3A|RPS15A|RPS13|RPL7|RPL19|RPL21|RPLP0|RPS11|RPL15|RPL27|RPS12|RPS25|RPS4X|RPL10A|RPS18|RPL18|RPS16|RPL26|RPS23|RPLP2|RPL31|RPS8|RPS9|RPS6	http://www.broadinstitute.org/gsea/msigdb/cards/GO_AMIDE_BIOSYNTHETIC_PROCESS	51	ENR	GO_AMIDE_BIOSYNTHETIC_PROCESS	2.1333625	0.0	GO_AMIDE_BIOSYNTHETIC_PROCESS	false	GO_AMIDE_BIOSYNTHETIC_PROCESS
78	1	1.0	0.63136464	1.2273912E-4	GO_NUCLEOLUS	0.004	HSPA9|EEF1A1|RPS2|HSPA8|KIF2A|NPM1|PPP1CC|RPS19|RPL12|RPL11|EIF3A|RPS3|PGRMC1|RPS7|NCL|UBE2N|PAFAH1B2|RPL23|RAN|RPS3A|XPO1|RPS13|SLC25A3|RPL7|RPL19|RPL21|ACADVL|RPS11|RPL13A|RPS25|RPL10A|RPL18|RPS23|CCT5|RPS9|CTSB|C1QBP|RPS6|RPS14	http://www.broadinstitute.org/gsea/msigdb/cards/GO_NUCLEOLUS	39	ENR	GO_NUCLEOLUS	2.1132565	0.0	GO_NUCLEOLUS	false	GO_NUCLEOLUS
79	1	1.0	0.55198693	0.0012549872	GO_PROTEIN_ LOCALIZATION_TO_ MEMBRANE	0.057	RAC1|ATP1B1|APOE|TOMM22|VAMP2|RPS19|MYO5A|STXBP1|RAB11B|CDH2|RAB31|SCP2|RPL13A|HSPA4|RPSA|RPS14|RPS2|RPL12|RPL6|RPL11|RPS17|RPS5|HSP90AA1|RPS29|RPS3|SSR1|RPS7|RPL22|ANXA2|RPL23|RPS3A|RPS15A|NSF|RPS13|RPL7|RPL19|RPL21|RPLP0|RPS11|RPL15|RPL27|RPS12|RPS25|RPS4X|RPL10A|RPS18|RPL18|RPS16|RPL26|RPS23|RPLP2|RPL31|RPS8|RPS9|RPS6	http://www.broadinstitute.org/gsea/msigdb/cards/GO_PROTEIN_LOCALIZATION_TO_MEMBRANE	55	ENR	GO_PROTEIN_LOCALIZATION_TO_MEMBRANE	1.9647206	0.0	GO_PROTEIN_LOCALIZATION_TO_MEMBRANE	false	GO_PROTEIN_LOCALIZATION_TO_MEMBRANE
80	3	-1.0	-0.5856492	0.00835236	GO_CELLULAR_ RESPIRATION	0.025	IDH2|UQCRQ|MDH1|SNCA|SLC1A3|NDUFS4|UQCRC2|NDUFV2|UQCRFS1|COX5A|NDUFA9|OGDH|PDHA1|IDH3B|SUCLG1|ETFA|MDH2|CYCS|IDH1|SDHA|IDH3A|PDHB|NDUFA5|COX5B|ETFB|SDHB|UQCRC1|ACO2|NDUFS1	http://www.broadinstitute.org/gsea/msigdb/cards/GO_CELLULAR_RESPIRATION	29	ENR	GO_CELLULAR_RESPIRATION	-2.1165926	0.0	GO_CELLULAR_RESPIRATION	false	GO_CELLULAR_RESPIRATION
81	2	-1.0	-0.44052222	0.03528762	GO_NEURON_PART	0.217	STMN1|VIM|SYN1|GNAQ|GNB1|HSPA8|APOE|SNCA|SNCB|STX1B|VAMP2|SLC6A1|STX1A|MYO5A|STXBP1|SYT1|CTNNB1|VDAC1|CADPS|SLC1A3|RAB11B|ITGB1|SOD1|VDAC2|DPYSL3|GARS|SV2A|CLIP2|RAB7A|HNRNPK|MARCKS|GOT1|SYNCRIP|STMN2|CALB1|DBN1|MAPT|PPP1CC|L1CAM|RTN4|CANX|UCHL1|GPM6A|MAP1B|HSP90AA1|PFN2|ATP2B1|DCLK1|GAP43|MYH10|PPP1R9B|OPA1|NSF|ATP1A3|ARPC2|ERC1|ARF1|FABP7|ENO2|PFN1|MPST|KHSRP|DPYSL5|YWHAE|MTPN|GOT2|NCDN|GDI1|TU…	http://www.broadinstitute.org/gsea/msigdb/cards/GO_NEURON_PART	76	ENR	GO_NEURON_PART	-1.9177214	0.0	GO_NEURON_PART	false	GO_NEURON_PART
82	1	1.0	0.5903593	1.380815E-4	GO_CELLULAR_AMIDE_ METABOLIC_ PROCESS	0.004	EIF5A|RPS19|EEF2|SOD1|ATPIF1|GARS|NCSTN|FASN|SLC25A3|GSTP1|SLC25A1|RPL13A|IDH1|RPSA|RPS14|TUFM|EEF1A1|RPS2|SLC25A4|EIF3C|RPL12|RPL6|RPL11|RPS17|NLN|EIF3A|RPS5|PC|ASAH1|RPS29|RPS3|PABPC1|RPS7|GSTA3|RPL22|RPL23|RPS3A|RPS15A|RPS13|RPL7|RPL19|RPL21|RPLP0|RPS11|RPL15|RPL27|RPS12|RPS25|RPS4X|RPL10A|RPS18|RPL18|RPS16|RPL26|RPS23|RPLP2|RPL31|RPS8|RPS9|RPS6	http://www.broadinstitute.org/gsea/msigdb/cards/GO_CELLULAR_AMIDE_METABOLIC_PROCESS	60	ENR	GO_CELLULAR_AMIDE_METABOLIC_PROCESS	2.1405325	0.0	GO_CELLULAR_AMIDE_METABOLIC_PROCESS	false	GO_CELLULAR_AMIDE_METABOLIC_PROCESS
83	1	1.0	0.6702661	0.0	GO_MRNA_METABOLIC_ PROCESS	0.0	HSPA8|RPS19|RPL13A|ELAVL1|HNRNPD|HNRNPA2B1|HNRNPA1|RPSA|HNRNPC|C1QBP|RPS14|RPS2|HNRNPK|SYNCRIP|RPL12|RPL6|RPL11|RPS17|RPS5|RPS29|RPS3|PABPC1|RPS7|RPL22|RPL23|HNRNPF|RPS3A|RPS15A|RPS13|RPL7|RPL19|RPL21|RPLP0|RPS11|RPL15|RPL27|RPS12|RPS25|RPS4X|KHSRP|RPL10A|RPS18|RPL18|RPS16|RPL26|RPS23|RPLP2|RPL31|RPS8|RPS9|HNRNPA3|HNRNPL|RPS6	http://www.broadinstitute.org/gsea/msigdb/cards/GO_MRNA_METABOLIC_PROCESS	53	ENR	GO_MRNA_METABOLIC_PROCESS	2.3558295	0.0	GO_MRNA_METABOLIC_PROCESS	false	GO_MRNA_METABOLIC_PROCESS
84	1	1.0	0.67703426	0.0	GO_PROTEIN_ TARGETING_TO_ MEMBRANE	0.0	RPS2|RPS19|RPL12|RPL6|RPL11|RPS17|RPS5|RPS29|RPS3|SSR1|RPS7|RPL22|ANXA2|RPL23|RPS3A|RPS15A|RPS13|RPL7|RPL19|RPL21|RPLP0|RPS11|RPL15|RPL13A|RPL27|RPS12|RPS25|RPS4X|RPL10A|RPS18|RPL18|RPS16|RPL26|RPSA|RPS23|RPLP2|RPL31|RPS8|RPS9|RPS6|RPS14	http://www.broadinstitute.org/gsea/msigdb/cards/GO_PROTEIN_TARGETING_TO_MEMBRANE	41	ENR	GO_PROTEIN_TARGETING_TO_MEMBRANE	2.2623773	0.0	GO_PROTEIN_TARGETING_TO_MEMBRANE	false	GO_PROTEIN_TARGETING_TO_MEMBRANE
85	1	1.0	0.62089545	7.638466E-5	GO_PROTEIN_ TARGETING	0.002	HSPA8|TOMM22|RPS19|CTNNB1|RAB7A|RPL13A|KPNB1|HSPA4|RPSA|FIS1|PHB2|RPS14|RPS2|SCARB2|RPL12|RPL6|RPL11|RPS17|RPS5|HSP90AA1|RPS29|RPS3|SSR1|RPS7|RPL22|RPL23|ANXA2|RAN|RPS3A|RPS15A|RPS13|RPL7|RPL19|RPL21|RPLP0|YWHAG|RPS11|YWHAB|RPL15|RPL27|RPS12|RPS25|RPS4X|RPL10A|YWHAE|RPS18|RPL18|RPS16|RPL26|RPS23|RPLP2|RPL31|RPS8|RPS9|RPS6	http://www.broadinstitute.org/gsea/msigdb/cards/GO_PROTEIN_TARGETING	55	ENR	GO_PROTEIN_TARGETING	2.1802003	0.0	GO_PROTEIN_TARGETING	false	GO_PROTEIN_TARGETING
86	1	1.0	0.5803111	3.147584E-4	GO_CYTOSOLIC_PART	0.012	RPS19|TCP1|PFKL|PRDX3|HBA1|HBB|RPL13A|RPSA|RPS14|RPS2|CYB5R3|PSMD2|RPL12|RPL6|RPL11|RPS17|RPS5|RPS29|RPS3|RPS7|RPL22|CCT4|RPL23|RPS3A|RPS15A|RPS13|RPL7|ERC1|RPL19|RPL21|RPLP0|RPS11|RPL15|ENO2|RPL27|RPS12|CCT3|RPS25|RPS4X|RPL10A|RPS18|RPL18|RPS16|RPL26|RPS23|RPLP2|RPL31|CCT5|RPS8|RPS9|RPS6	http://www.broadinstitute.org/gsea/msigdb/cards/GO_CYTOSOLIC_PART	51	ENR	GO_CYTOSOLIC_PART	2.053	0.0	GO_CYTOSOLIC_PART	false	GO_CYTOSOLIC_PART
87	1	1.0	0.66782856	0.0	GO_RNA_PROCESSING	0.0	HSPA8|RPS19|RPL13A|ELAVL1|HNRNPD|HNRNPA2B1|HNRNPA1|RPSA|HNRNPC|C1QBP|RPS14|RPS2|HNRNPK|SYNCRIP|HSD17B10|RPL12|RPL6|RPL11|RPS17|RPS5|RPS29|RPS3|PABPC1|RPS7|RPL22|RPL23|HNRNPF|PPP1R9B|RPS3A|RPS15A|RPS13|RPL7|RPL19|RPL21|RPLP0|RPS11|RPL15|RPL27|RPS12|RPS25|KHSRP|RPS4X|RPL10A|RPS18|RPL18|RPS16|RPL26|RPS23|RPLP2|RPL31|RPS8|HNRNPA3|RPS9|HNRNPL|RPS6	http://www.broadinstitute.org/gsea/msigdb/cards/GO_RNA_PROCESSING	55	ENR	GO_RNA_PROCESSING	2.3717937	0.0	GO_RNA_PROCESSING	false	GO_RNA_PROCESSING
88	1	1.0	0.59815836	7.306359E-5	GO_PEPTIDE_ METABOLIC_ PROCESS	0.002	EIF5A|RPS19|EEF2|SOD1|GARS|NCSTN|SLC25A3|GSTP1|SLC25A1|RPL13A|IDH1|RPSA|RPS14|TUFM|RPS2|EEF1A1|SLC25A4|EIF3C|RPL12|RPL6|RPL11|NLN|RPS17|EIF3A|RPS5|RPS29|RPS3|PABPC1|RPS7|GSTA3|RPL22|RPL23|RPS3A|RPS15A|RPS13|RPL7|RPL19|RPL21|RPLP0|RPS11|RPL15|RPL27|RPS12|RPS25|RPS4X|RPL10A|RPS18|RPL18|RPS16|RPL26|RPS23|RPLP2|RPL31|RPS8|RPS9|RPS6	http://www.broadinstitute.org/gsea/msigdb/cards/GO_PEPTIDE_METABOLIC_PROCESS	56	ENR	GO_PEPTIDE_METABOLIC_PROCESS	2.1481214	0.0	GO_PEPTIDE_METABOLIC_PROCESS	false	GO_PEPTIDE_METABOLIC_PROCESS
89	1	1.0	0.66182613	0.0	GO_RIBOSOMAL_ SUBUNIT	0.0	RPS2|RPS19|RPL12|RPL6|RPL11|RPS17|RPS5|RPS29|RPS3|RPS7|RPL22|RPL23|RPS3A|RPS15A|RPS13|RPL7|HBA1|RPL19|RPL21|RPLP0|RPS11|RPL15|RPL27|RPL13A|RPS12|RPS25|RPS4X|RPL10A|RPS18|RPL18|RPS16|RPL26|RPSA|RPS23|RPLP2|RPL31|RPS8|RPS9|RPS14|RPS6	http://www.broadinstitute.org/gsea/msigdb/cards/GO_RIBOSOMAL_SUBUNIT	40	ENR	GO_RIBOSOMAL_SUBUNIT	2.20804	0.0	GO_RIBOSOMAL_SUBUNIT	false	GO_RIBOSOMAL_SUBUNIT
90	1	1.0	0.67029536	0.0	GO_RNA_CATABOLIC_ PROCESS	0.0	RPS2|RPS19|RPL12|RPL6|RPL11|RPS17|RPS5|RPS29|RPS3|PABPC1|RPS7|RPL22|RPL23|RPS3A|RPS15A|RPS13|RPL7|RPL19|RPL21|RPLP0|RPS11|RPL15|RPL13A|RPL27|RPS12|RPS25|RPS4X|KHSRP|RPL10A|HNRNPD|RPS18|RPL18|RPS16|RPSA|RPL26|RPS23|RPLP2|RPL31|RPS8|RPS9|RPS6|RPS14	http://www.broadinstitute.org/gsea/msigdb/cards/GO_RNA_CATABOLIC_PROCESS	42	ENR	GO_RNA_CATABOLIC_PROCESS	2.2798722	0.0	GO_RNA_CATABOLIC_PROCESS	false	GO_RNA_CATABOLIC_PROCESS
91	1	1.0	0.58815736	4.5913522E-4	GO_ESTABLISHMENT_ OF_PROTEIN_ LOCALIZATION_TO_ MEMBRANE	0.018	ATP1B1|TOMM22|VAMP2|RPS19|RAB11B|CDH2|RAB31|RPL13A|HSPA4|RPSA|RPS14|RPS2|RPL12|RPL6|RPL11|RPS17|RPS5|HSP90AA1|RPS29|RPS3|SSR1|RPS7|RPL22|RPL23|ANXA2|RPS3A|NSF|RPS15A|RPS13|RPL7|RPL19|RPL21|RPLP0|RPS11|RPL15|RPL27|RPS12|RPS25|RPS4X|RPL10A|RPS18|RPL18|RPS16|RPL26|RPS23|RPLP2|RPL31|RPS8|RPS9|RPS6	http://www.broadinstitute.org/gsea/msigdb/cards/GO_ESTABLISHMENT_OF_PROTEIN_LOCALIZATION_TO_MEMBRANE	50	ENR	GO_ESTABLISHMENT_OF_PROTEIN_LOCALIZATION_TO_MEMBRANE	2.0353189	0.0	GO_ESTABLISHMENT_OF_PROTEIN_LOCALIZATION_TO_MEMBRANE	false	GO_ESTABLISHMENT_OF_PROTEIN_LOCALIZATION_TO_MEMBRANE
92	1	1.0	0.61592937	1.3859976E-4	GO_RIBOSOME	0.005	RPS2|SNCA|RPS19|RPL12|RPL6|RPL11|RPS17|CANX|RPS5|RPS29|RPS3|EEF2|RPS7|RPL22|RPL23|RPS3A|RPS15A|RPS13|RPL7|HBA1|RPL19|RPL21|RPLP0|RPS11|RPL15|RPL27|RPL13A|RPS12|RPS25|RPS4X|RPL10A|RPS18|RPL18|RPS16|RPL26|RPSA|RPS23|RPLP2|RPL31|RPS8|RPS9|RPS14|RPS6	http://www.broadinstitute.org/gsea/msigdb/cards/GO_RIBOSOME	43	ENR	GO_RIBOSOME	2.087007	0.0	GO_RIBOSOME	false	GO_RIBOSOME
93	1	1.0	0.66975564	0.0	GO_NCRNA_ PROCESSING	0.0	RPS2|HSD17B10|RPS19|RPL12|RPL6|RPL11|RPS17|RPS5|RPS29|RPS3|RPS7|RPL22|RPL23|RPS3A|RPS15A|RPS13|RPL7|RPL19|RPL21|RPLP0|RPS11|RPL15|RPL13A|RPL27|RPS12|RPS25|RPS4X|RPL10A|RPS18|HNRNPA2B1|RPL18|RPS16|RPL26|RPSA|RPS23|RPLP2|RPL31|RPS8|RPS9|RPS6|RPS14	http://www.broadinstitute.org/gsea/msigdb/cards/GO_NCRNA_PROCESSING	41	ENR	GO_NCRNA_PROCESSING	2.2560384	0.0	GO_NCRNA_PROCESSING	false	GO_NCRNA_PROCESSING
94	1	1.0	0.6768961	0.0	GO_RRNA_METABOLIC_ PROCESS	0.0	RPS2|RPS19|RPL12|RPL6|RPL11|RPS17|RPS5|RPS29|RPS3|RPS7|RPL22|RPL23|RPS3A|RPS15A|RPS13|RPL7|RPL19|RPL21|RPLP0|RPS11|RPL15|RPL27|RPL13A|RPS12|RPS25|RPS4X|RPL10A|RPS18|RPL18|RPS16|RPSA|RPL26|RPS23|RPLP2|RPL31|RPS8|RPS9|RPS14|RPS6	http://www.broadinstitute.org/gsea/msigdb/cards/GO_RRNA_METABOLIC_PROCESS	39	ENR	GO_RRNA_METABOLIC_PROCESS	2.2384183	0.0	GO_RRNA_METABOLIC_PROCESS	false	GO_RRNA_METABOLIC_PROCESS
95	1	1.0	0.5348969	1.4337906E-4	GO_CELLULAR_ CATABOLIC_ PROCESS	0.005	TPI1|APOE|GLS|HSP90B1|RPS19|CTNNB1|UBA1|PSMB6|RAB7A|HSD17B4|OGDH|RPL13A|POR|HNRNPD|ETFA|CRYM|RPSA|ETFB|CTSB|RPS14|DDAH2|RPS2|PRDX6|GOT1|PSMB5|PSMA1|PSMA2|PSMD2|PSMB4|PSMA6|PRDX2|RPL12|RPL6|RPL11|RPS17|UCHL1|RPS5|RPS29|RPS3|PABPC1|RPS7|RPL22|RPL23|RPS3A|RPS15A|RPS13|RPL7|RPL19|RPL21|RPLP0|ACADVL|RPS11|GAA|RPL15|FABP7|RPL27|RPS12|MPST|RPS25|KHSRP|RPS4X|RPL10A|RPS18|RPL18|RPS16|GOT2|RPL26|RPS23|RPLP…	http://www.broadinstitute.org/gsea/msigdb/cards/GO_CELLULAR_CATABOLIC_PROCESS	103	ENR	GO_CELLULAR_CATABOLIC_PROCESS	2.091485	0.0	GO_CELLULAR_CATABOLIC_PROCESS	false	GO_CELLULAR_CATABOLIC_PROCESS
96	1	1.0	0.5279309	9.848981E-4	GO_INTERSPECIES_ INTERACTION_ BETWEEN_ ORGANISMS	0.04	VIM|HSPA8|APOE|RTN3|NPM1|RPS19|PPIA|VCP|VDAC1|ITGB1|TCP1|HSPD1|DYNLT1|PSMB6|ALB|RAB7A|MFGE8|PPIB|RPL13A|KPNB1|HNRNPA1|NCAM1|RPSA|BANF1|CTSB|C1QBP|RPS14|SND1|RPS2|HNRNPK|SCARB2|PSMB5|SYNCRIP|PSMB4|SLC25A4|RPL12|HSP90AB1|RPL6|RPL11|RPS17|EIF3A|PC|RPS5|RPS29|RPS3|VAPA|RPS7|NCKAP1|CFL1|RHOA|RPL22|DYNLL1|RPL23|RAN|RPS3A|XPO1|RPS15A|RPS13|RPL7|RPL19|RPL21|RPLP0|RPS11|YWHAB|RPL15|RPL27|RPS12|RPS25|RPS4X…	http://www.broadinstitute.org/gsea/msigdb/cards/GO_INTERSPECIES_INTERACTION_BETWEEN_ORGANISMS	83	ENR	GO_INTERSPECIES_INTERACTION_BETWEEN_ORGANISMS	1.9882087	0.0	GO_INTERSPECIES_INTERACTION_BETWEEN_ORGANISMS	false	GO_INTERSPECIES_INTERACTION_BETWEEN_ORGANISMS
97	2	-1.0	-0.62575966	0.02880312	GO_PRESYNAPSE	0.123	SYN1|HSPA8|SNCA|RAB7A|SNCB|ERC1|STX1B|CALB1|VAMP2|STX1A|STXBP1|SYT1|VDAC1|CADPS|RAB11B|VDAC2|PFN2|SV2A	http://www.broadinstitute.org/gsea/msigdb/cards/GO_PRESYNAPSE	18	ENR	GO_PRESYNAPSE	-1.9805341	0.0	GO_PRESYNAPSE	false	GO_PRESYNAPSE
98	1	1.0	0.4709364	0.015263052	GO_INTRACELLULAR_ PROTEIN_ TRANSPORT	0.598	ERP29|HSPA8|NAPB|ATP1B1|PDCD6|TOMM22|EIF5A|STX1B|NPM1|VAMP2|HSP90B1|RPS19|STX1A|VCP|CTNNB1|CLTC|RAB11B|ITGB1|RAB31|DYNLT1|RAB2A|TMED10|RAB7A|RAB18|RPL13A|KPNB1|HSPA4|RPSA|FIS1|PHB2|RPS14|RPS2|HSPA9|MARCKS|SCARB2|RPL12|RPL6|RPL11|RPS17|RPS5|HSP90AA1|RPS29|RPS3|SSR1|RAP1B|RPS7|RPL22|DYNLL1|RPL23|ANXA2|RAN|XPO1|RPS3A|RPS15A|NSF|RPS13|RPL7|RPL19|RPL21|RPLP0|YWHAH|YWHAG|RPS11|YWHAB|RPL15|RPL27|RPS12|R…	http://www.broadinstitute.org/gsea/msigdb/cards/GO_INTRACELLULAR_PROTEIN_TRANSPORT	82	ENR	GO_INTRACELLULAR_PROTEIN_TRANSPORT	1.7740716	0.0	GO_INTRACELLULAR_PROTEIN_TRANSPORT	false	GO_INTRACELLULAR_PROTEIN_TRANSPORT
99	1	1.0	0.6501022	0.0	GO_RIBOSOME_ BIOGENESIS	0.0	RPS2|NPM1|RPS19|RPL12|RPL6|RPL11|RPS17|RPS5|RPS29|RPS3|RPS7|RPL22|RPL23|RAN|RPS3A|XPO1|RPS15A|RPS13|RPL7|RPL19|RPL21|RPLP0|RPS11|RPL15|RPL13A|RPL27|RPS12|RPS25|RPS4X|RPL10A|RPS18|RPL18|RPS16|RPL26|RPSA|RPS23|RPLP2|RPL31|RPS8|RPS9|C1QBP|RPS6|RPS14	http://www.broadinstitute.org/gsea/msigdb/cards/GO_RIBOSOME_BIOGENESIS	43	ENR	GO_RIBOSOME_BIOGENESIS	2.2239277	0.0	GO_RIBOSOME_BIOGENESIS	false	GO_RIBOSOME_BIOGENESIS
100	3	-1.0	-0.518552	0.034559775	GO_ENERGY_ DERIVATION_BY_ OXIDATION_OF_ ORGANIC_ COMPOUNDS	0.192	IDH2|UQCRQ|MDH1|SNCA|PPP1CC|SLC1A3|NDUFS4|UQCRC2|NDUFV2|ACADVL|UQCRFS1|COX5A|GAA|NDUFA9|OGDH|PDHA1|IDH3B|SUCLG1|ETFA|MDH2|CYCS|IDH1|SDHA|IDH3A|PDHB|NDUFA5|COX5B|ETFB|SDHB|UQCRC1|ACO2|NDUFS1	http://www.broadinstitute.org/gsea/msigdb/cards/GO_ENERGY_DERIVATION_BY_OXIDATION_OF_ORGANIC_COMPOUNDS	32	ENR	GO_ENERGY_DERIVATION_BY_OXIDATION_OF_ORGANIC_COMPOUNDS	-1.9329691	0.0	GO_ENERGY_DERIVATION_BY_OXIDATION_OF_ORGANIC_COMPOUNDS	false	GO_ENERGY_DERIVATION_BY_OXIDATION_OF_ORGANIC_COMPOUNDS
101	3	-1.0	-0.38414717	0.04263412	GO_MITOCHONDRIAL_ PART	0.529	SNCA|GLS|VDAC1|SLC1A3|SOD1|VDAC2|GARS|HSPD1|NDUFS4|UQCRC2|NDUFV2|UQCRFS1|COX5A|NDUFA9|OGDH|PDHA1|IDH3B|SUCLG1|ETFA|MDH2|CYCS|SDHA|IDH3A|PDHB|NDUFA5|COX5B|ETFB|SDHB|UQCRC1|ACO2|NDUFS1|IDH2|UQCRQ|PPP1CC|RPS3|HK1|OPA1|ACADVL|GOT2|ABAT|ATP5B|IMMT|TOMM22|ATP5H|ATP5I|ATP5L|ATP5O|ATP5J2|ATP5A1|USMG5|ATP5D|ATP5F1|ATPIF1|VDAC3|GPD2|PRDX3|GCSH|SLC25A3|ABCD3|SLC25A1|SFXN5|WASF1|FIS1|BDH1|HADHA|DECR1|PHB2|HI…	http://www.broadinstitute.org/gsea/msigdb/cards/GO_MITOCHONDRIAL_PART	97	ENR	GO_MITOCHONDRIAL_PART	-1.7888058	0.0	GO_MITOCHONDRIAL_PART	false	GO_MITOCHONDRIAL_PART
102	1	1.0	0.6543906	0.0	GO_ESTABLISHMENT_ OF_PROTEIN_ LOCALIZATION_TO_ ORGANELLE	0.0	HSPA8|TOMM22|RPS19|CTNNB1|RAB7A|RPL13A|KPNB1|HSPA4|RPSA|FIS1|PHB2|RPS14|RPS2|SCARB2|RPL12|RPL6|RPL11|RPS17|RPS5|HSP90AA1|RPS29|RPS3|HK1|RPS7|RPL22|RPL23|RAN|RPS3A|RPS15A|RPS13|RPL7|RPL19|RPL21|RPLP0|RPS11|RPL15|RPL27|RPS12|RPS25|RPS4X|RPL10A|RPS18|RPL18|RPS16|RPL26|RPS23|RPLP2|RPL31|RPS8|RPS9|RPS6	http://www.broadinstitute.org/gsea/msigdb/cards/GO_ESTABLISHMENT_OF_PROTEIN_LOCALIZATION_TO_ORGANELLE	51	ENR	GO_ESTABLISHMENT_OF_PROTEIN_LOCALIZATION_TO_ORGANELLE	2.2902308	0.0	GO_ESTABLISHMENT_OF_PROTEIN_LOCALIZATION_TO_ORGANELLE	false	GO_ESTABLISHMENT_OF_PROTEIN_LOCALIZATION_TO_ORGANELLE
103	1	1.0	0.49490365	0.0010262284	GO_CATABOLIC_ PROCESS	0.044	LDHA|TPI1|PGK1|ALDOC|APOE|GLS|SLC6A1|HSP90B1|RPS19|CTNNB1|SLC1A3|UBA1|ALDOA|PSMB6|RAB7A|HSD17B4|RPL13A|OGDH|POR|ETFA|HNRNPD|CRYM|RPSA|ETFB|CTSB|RPS14|DDAH2|MDH1|CTSD|RPS2|PRDX6|GOT1|PSMB5|PSMA1|PSMA2|PSMD2|PSMB4|PSMA6|PRDX2|RPL12|RPL6|RPL11|RPS17|UCHL1|RPS5|RPS29|RPS3|PABPC1|HK1|PLD3|RPS7|RPL22|PAFAH1B2|RPL23|RPS3A|RPS15A|RPS13|RPL7|RPL19|RPL21|ACADVL|RPLP0|GAA|RPS11|FABP7|RPL15|ENO2|RPL27|RPS12|…	http://www.broadinstitute.org/gsea/msigdb/cards/GO_CATABOLIC_PROCESS	124	ENR	GO_CATABOLIC_PROCESS	1.9826316	0.0	GO_CATABOLIC_PROCESS	false	GO_CATABOLIC_PROCESS
104	2	-1.0	-0.61163265	0.008397511	GO_SECRETORY_ VESICLE	0.019	SYN1|SNCA|STX1B|VAMP2|STX1A|MYO5A|STXBP1|SYT1|VDAC1|RAB11B|ITGB1|SOD1|VDAC2|DPYSL3|GARS|SV2A|CLIP2|TCP1|ALDOA|HSPD1|LAMP2|DYNLT1|ALB|TMED10|RAB7A	http://www.broadinstitute.org/gsea/msigdb/cards/GO_SECRETORY_VESICLE	25	ENR	GO_SECRETORY_VESICLE	-2.1349638	0.0	GO_SECRETORY_VESICLE	false	GO_SECRETORY_VESICLE
105	1	1.0	0.49788374	0.0011102953	GO_POLY_A_RNA_ BINDING	0.049	HSPA8|EIF5A|NPM1|RPS19|PPIA|MYO5A|STXBP1|PLEC|TXN|EEF2|NCL|UBA1|TCP1|ALDOA|FASN|HSPD1|PPIB|RPL13A|ELAVL1|PEBP1|SUCLG1|HNRNPD|HNRNPA2B1|MDH2|HNRNPA1|RPSA|HNRNPC|RPS14|SND1|RPS2|EEF1A1|HNRNPK|SUMO2|SYNCRIP|PPP1CC|EIF3C|HSP90AB1|RPL12|RTN4|RPL6|RPL11|RPS17|CANX|EIF3A|RPS5|HSP90AA1|MAPRE1|RPS3|PABPC1|RPS7|RPL22|RPL23|HNRNPF|RPS3A|RPS15A|RPS13|RPL7|RPL19|RPL21|ARF1|RPLP0|RPS11|RPL15|RPL27|PFN1|RPS12|R…	http://www.broadinstitute.org/gsea/msigdb/cards/GO_POLY_A_RNA_BINDING	111	ENR	GO_POLY_A_RNA_BINDING	1.9762056	0.0	GO_POLY_A_RNA_BINDING	false	GO_POLY_A_RNA_BINDING
106	2	-1.0	-0.63621145	0.009330669	GO_CELL_CELL_ SIGNALING	0.014	RAC1|SYN1|GNAQ|GNB1|HSPA8|APOE|SNCA|SNCB|GLS|STX1B|RTN3|VAMP2|SLC6A1|STX1A|MYO5A|STXBP1|SYT1|CTNNB1|VDAC1|CADPS|SNAP91|SLC1A3|RAB11B|TXN	http://www.broadinstitute.org/gsea/msigdb/cards/GO_CELL_CELL_SIGNALING	24	ENR	GO_CELL_CELL_SIGNALING	-2.1671448	0.0	GO_CELL_CELL_SIGNALING	false	GO_CELL_CELL_SIGNALING
107	1	1.0	0.67437553	0.0	GO_PROTEIN_ LOCALIZATION_TO_ ENDOPLASMIC_ RETICULUM	0.0	RPS2|RPS19|RPL12|RPL6|RPL11|RPS17|RPS5|RPS29|RPS3|VAPA|RPS7|RPL22|RPL23|RPS3A|RPS15A|RPS13|RPL7|RPL19|RPL21|RPLP0|RPS11|RPL15|RPL27|RPL13A|RPS12|RPS25|RPS4X|RPL10A|RPS18|RPL18|RPS16|RPSA|RPL26|RPS23|RPLP2|RPL31|RPS8|RPS9|RPS14|RPS6	http://www.broadinstitute.org/gsea/msigdb/cards/GO_PROTEIN_LOCALIZATION_TO_ENDOPLASMIC_RETICULUM	40	ENR	GO_PROTEIN_LOCALIZATION_TO_ENDOPLASMIC_RETICULUM	2.2237158	0.0	GO_PROTEIN_LOCALIZATION_TO_ENDOPLASMIC_RETICULUM	false	GO_PROTEIN_LOCALIZATION_TO_ENDOPLASMIC_RETICULUM
108	2	-1.0	-0.4968491	0.008350546	GO_CELL_ PROJECTION_PART	0.03	RAC1|SYN1|GNB1|SNCA|SNCB|VAMP2|MYO5A|STXBP1|SYT1|CTNNB1|SLC1A3|ITGB1|SOD1|DPYSL3|SV2A|CLIP2|RAB7A|EEF1A1|HNRNPK|MARCKS|GOT1|DYNLL2|SYNCRIP|KIF2A|STMN2|CALB1|DBN1|MAPT|PPP1CC|L1CAM|HSP90AB1|RTN4|DYNLRB1|CANX|UCHL1|GPM6A|MAP1B|HSP90AA1|MAPRE1|RPS3|HK1|PFN2|ATP2B1|DCLK1|GAP43|NCKAP1|CFL1|MYH10|DYNLL1|AK1|PPP1R9B|OPA1|NSF|ATP1A3|ARPC2	http://www.broadinstitute.org/gsea/msigdb/cards/GO_CELL_PROJECTION_PART	55	ENR	GO_CELL_PROJECTION_PART	-2.0966272	0.0	GO_CELL_PROJECTION_PART	false	GO_CELL_PROJECTION_PART
109	1	1.0	0.6091822	1.3255824E-4	GO_VIRAL_LIFE_ CYCLE	0.004	APOE|RPS19|PPIA|VCP|ITGB1|DYNLT1|RAB7A|RPL13A|KPNB1|NCAM1|RPSA|CTSB|RPS14|RPS2|SCARB2|HSP90AB1|RPL12|RPL6|RPL11|RPS17|EIF3A|PC|RPS5|RPS29|RPS3|RPS7|RPL22|RPL23|RAN|RPS3A|XPO1|RPS15A|RPS13|RPL7|RPL19|RPL21|RPLP0|RPS11|RPL15|RPL27|RPS12|RPS25|RPS4X|RPL10A|RPS18|RPL18|RPS16|RPL26|RPS23|RPLP2|RPL31|RPS8|RPS9|RPS6	http://www.broadinstitute.org/gsea/msigdb/cards/GO_VIRAL_LIFE_CYCLE	54	ENR	GO_VIRAL_LIFE_CYCLE	2.1369672	0.0	GO_VIRAL_LIFE_CYCLE	false	GO_VIRAL_LIFE_CYCLE
110	1	1.0	0.6450945	0.0	GO_PROTEIN_ LOCALIZATION_TO_ ORGANELLE	0.0	HSPA8|TOMM22|RPS19|CTNNB1|RAB7A|RPL13A|KPNB1|HSPA4|RPSA|FIS1|PHB2|RPS14|RPS2|SCARB2|RPL12|RPL6|RPL11|RPS17|RPS5|HSP90AA1|MAPRE1|RPS29|RPS3|HK1|VAPA|RPS7|RPL22|RPL23|RAN|XPO1|RPS3A|RPS15A|RPS13|RPL7|RPL19|RPL21|RPLP0|RPS11|RPL15|RPL27|RPS12|RPS25|RPS4X|RPL10A|RPS18|RPL18|RPS16|RPL26|RPS23|RPLP2|RPL31|RPS8|RPS9|RPS6	http://www.broadinstitute.org/gsea/msigdb/cards/GO_PROTEIN_LOCALIZATION_TO_ORGANELLE	54	ENR	GO_PROTEIN_LOCALIZATION_TO_ORGANELLE	2.2813478	0.0	GO_PROTEIN_LOCALIZATION_TO_ORGANELLE	false	GO_PROTEIN_LOCALIZATION_TO_ORGANELLE
111	1	1.0	0.5085005	6.1499176E-4	GO_RNA_BINDING	0.025	HSPA8|EIF5A|NPM1|HSP90B1|RPS19|PPIA|MYO5A|STXBP1|PLEC|TXN|EEF2|NCL|UBA1|TCP1|ALDOA|FASN|HSPD1|PPIB|RPL13A|ELAVL1|PEBP1|SUCLG1|HNRNPD|MDH2|HNRNPA2B1|HNRNPA1|RPSA|HNRNPC|RPS14|SND1|RPS2|EEF1A1|HNRNPK|SUMO2|SYNCRIP|PSMA1|PSMA6|PPP1CC|EIF3C|HSP90AB1|RPL12|RPL6|RTN4|RPL11|RPS17|CANX|EIF3A|RPS5|HSP90AA1|MAPRE1|RPS3|PABPC1|RPS7|RPL22|RPL23|HNRNPF|RPS3A|RPS15A|RPS13|RPL7|RPL19|RPL21|ARF1|RPLP0|RPS11|RPL1…	http://www.broadinstitute.org/gsea/msigdb/cards/GO_RNA_BINDING	119	ENR	GO_RNA_BINDING	2.0115151	0.0	GO_RNA_BINDING	false	GO_RNA_BINDING
112	1	1.0	0.64399177	0.0	GO_ORGANIC_CYCLIC_ COMPOUND_ CATABOLIC_ PROCESS	0.0	RPS2|APOE|RPS19|RPL12|RPL6|VCP|RPL11|RPS17|RPS5|RPS29|RPS3|PABPC1|RPS7|RPL22|RPL23|RPS3A|RPS15A|RPS13|RPL7|RPL19|RPL21|YWHAH|RPLP0|RPS11|RPL15|RPL13A|RPL27|RPS12|KPNB1|RPS25|RPS4X|KHSRP|RPL10A|HNRNPD|RPS18|RPL18|RPS16|GOT2|RPSA|RPL26|RPS23|RPLP2|RPL31|RPS8|HMGB1|RPS9|RPS6|RPS14	http://www.broadinstitute.org/gsea/msigdb/cards/GO_ORGANIC_CYCLIC_COMPOUND_CATABOLIC_PROCESS	48	ENR	GO_ORGANIC_CYCLIC_COMPOUND_CATABOLIC_PROCESS	2.240325	0.0	GO_ORGANIC_CYCLIC_COMPOUND_CATABOLIC_PROCESS	false	GO_ORGANIC_CYCLIC_COMPOUND_CATABOLIC_PROCESS
113	1	1.0	0.62173206	0.0	GO_ RIBONUCLEOPROTEIN_ COMPLEX	0.0	RAC1|HSPA8|SNCA|NPM1|RPS19|EEF2|NCL|HBA1|RPL13A|HNRNPD|HNRNPA2B1|HNRNPA1|RPSA|HNRNPC|RPS14|SND1|RPS2|HNRNPK|MARCKS|SYNCRIP|PSMA1|PSMA2|MAPT|PSMA6|EIF3C|RPL12|RPL6|LRPPRC|RPL11|CANX|RPS17|EIF3A|RPS5|RPS29|RPS3|PABPC1|RPS7|RPL22|RPL23|HNRNPF|RPS3A|XPO1|RPS15A|RPS13|RPL7|RPL19|RPL21|RPLP0|RPS11|RPL15|RPL27|RPS12|RPS25|RPS4X|KHSRP|TUBA1A|RPL10A|RPS18|RPL18|RPS16|RPL26|RPS23|RPLP2|RPL31|RPS8|RPS9|HNRN…	http://www.broadinstitute.org/gsea/msigdb/cards/GO_RIBONUCLEOPROTEIN_COMPLEX	70	ENR	GO_RIBONUCLEOPROTEIN_COMPLEX	2.3115823	0.0	GO_RIBONUCLEOPROTEIN_COMPLEX	false	GO_RIBONUCLEOPROTEIN_COMPLEX
114	1	1.0	0.68510014	0.0	GO_TRANSLATIONAL_ INITIATION	0.0	RPS2|RPS19|EIF3C|RPL12|RPL6|RPL11|RPS17|EIF3A|RPS5|RPS29|RPS3|PABPC1|RPS7|RPL22|RPL23|RPS3A|RPS15A|RPS13|RPL7|RPL19|RPL21|RPLP0|RPS11|RPL15|RPL13A|RPL27|RPS12|RPS25|RPS4X|RPL10A|RPS18|RPL18|RPS16|RPSA|RPL26|RPS23|RPLP2|RPL31|RPS8|RPS9|RPS6|RPS14	http://www.broadinstitute.org/gsea/msigdb/cards/GO_TRANSLATIONAL_INITIATION	42	ENR	GO_TRANSLATIONAL_INITIATION	2.3246667	0.0	GO_TRANSLATIONAL_INITIATION	false	GO_TRANSLATIONAL_INITIATION
115	3	-1.0	-0.44873118	0.048216194	GO_MEMBRANE_ PROTEIN_COMPLEX	0.309	ATP5B|IMMT|DDOST|GNB1|NAPB|ATP1B1|DCTN1|SNCA|ATP2A2|TOMM22|STX1B|ATP5H|SNX3|RPN1|VAMP2|ATP5I|ATP5L|STX1A|RPN2|ATP5O|SYT1|VCP|CTNNB1|NCALD|VDAC1|ATP5J2|ATP5A1|USMG5|B2M|CLTC|ATP5D|ITGB1|SEC22B|CDH2|VDAC2|ATP5F1|ATPIF1|VDAC3|HSPD1|LAMP2|TMED10|RAB7A|NDUFS4|UQCRC2|NDUFV2|UQCRFS1|COX5A|NDUFA9|SDHA|NDUFA5|SDHB|UQCRC1|NDUFS1|ATP1A3|GNAO1|ALCAM	http://www.broadinstitute.org/gsea/msigdb/cards/GO_MEMBRANE_PROTEIN_COMPLEX	56	ENR	GO_MEMBRANE_PROTEIN_COMPLEX	-1.8673233	0.0	GO_MEMBRANE_PROTEIN_COMPLEX	false	GO_MEMBRANE_PROTEIN_COMPLEX
116	1	1.0	0.56845313	0.0010547348	GO_STRUCTURAL_ MOLECULE_ ACTIVITY	0.044	VIM|RPS19|MYL6|PLEC|CLTC|EPB41L1|SLC25A3|SLC25A1|RPL13A|RPSA|NES|RPS14|RPS2|MAPT|SLC25A4|RPL12|RPL6|RPL11|RPS17|EIF3A|RPS5|MAP1B|RPS29|KRT10|RPS3|RPS7|RPL22|RPL23|RPS3A|LMNB1|RPS15A|MATR3|RPS13|ARPC2|RPL7|RPL19|RPL21|RPLP0|RPS11|RPL15|RPL27|RPS12|RPS4X|TUBA1A|RPL10A|RPS18|RPL18|RPS16|RPL26|RPS23|TUBB3|RPLP2|RPL31|RPS8|RPS9|RPS6	http://www.broadinstitute.org/gsea/msigdb/cards/GO_STRUCTURAL_MOLECULE_ACTIVITY	56	ENR	GO_STRUCTURAL_MOLECULE_ACTIVITY	1.9826617	0.0	GO_STRUCTURAL_MOLECULE_ACTIVITY	false	GO_STRUCTURAL_MOLECULE_ACTIVITY
117	1	1.0	0.6618261	0.0	GO_CYTOSOLIC_ RIBOSOME	0.0	RPS2|RPS19|RPL12|RPL6|RPL11|RPS17|RPS5|RPS29|RPS3|RPS7|RPL22|RPL23|RPS3A|RPS15A|RPS13|RPL7|HBA1|RPL19|RPL21|RPLP0|RPS11|RPL15|RPL13A|RPL27|RPS12|RPS25|RPS4X|RPL10A|RPS18|RPL18|RPS16|RPL26|RPSA|RPS23|RPLP2|RPL31|RPS8|RPS9|RPS6|RPS14	http://www.broadinstitute.org/gsea/msigdb/cards/GO_CYTOSOLIC_RIBOSOME	40	ENR	GO_CYTOSOLIC_RIBOSOME	2.2219634	0.0	GO_CYTOSOLIC_RIBOSOME	false	GO_CYTOSOLIC_RIBOSOME

## Sheet: Enrichmentmap_edges
EM1_Overlap_genes	EM1_Overlap_size	EM1_similarity_coefficient	name	selected	shared interaction	shared name
RPL31|RPL13A|RPL6|RPL18|RPL10A|RPL7|RPL12|RPL11|RPL21|RPL19|RPL27|RPL22|RPLP0|RPLP2|RPL26|RPL15|RPL23	17	0.6574074074074074	GO_LARGE_RIBOSOMAL_SUBUNIT (Geneset_Overlap_Data Set 1) GO_PROTEIN_LOCALIZATION_TO_ORGANELLE	false	Geneset_Overlap	GO_LARGE_RIBOSOMAL_SUBUNIT (Geneset_Overlap_Data Set 1) GO_PROTEIN_LOCALIZATION_TO_ORGANELLE
RPL31|RPL13A|RPL6|RPL18|RPL10A|RPL7|RPL12|RPL11|RPL21|RPL19|RPL27|RPL22|RPLP0|RPLP2|RPL26|RPL15|RPL23	17	0.608974358974359	GO_LARGE_RIBOSOMAL_SUBUNIT (Geneset_Overlap_Data Set 1) GO_ORGANONITROGEN_COMPOUND_BIOSYNTHETIC_PROCESS	false	Geneset_Overlap	GO_LARGE_RIBOSOMAL_SUBUNIT (Geneset_Overlap_Data Set 1) GO_ORGANONITROGEN_COMPOUND_BIOSYNTHETIC_PROCESS
RPL31|RPL13A|RPL6|RPL18|RPL10A|RPL7|RPL12|RPL11|RPL21|RPL19|RPL27|RPL22|RPLP0|RPLP2|RPL26|RPL15|RPL23	17	0.7023809523809523	GO_LARGE_RIBOSOMAL_SUBUNIT (Geneset_Overlap_Data Set 1) GO_NCRNA_METABOLIC_PROCESS	false	Geneset_Overlap	GO_LARGE_RIBOSOMAL_SUBUNIT (Geneset_Overlap_Data Set 1) GO_NCRNA_METABOLIC_PROCESS
RPS8|RPL22|RPS14|RPS19|RPS4X|RPL31|RPS29|RPS3|RPS9|RPL10A|RPS18|RPL7|RPS12|RPS25|RPL27|RPS3A|RPL11|RPL6|RPL13A|RPLP2|RPS13|RPS15A|RPL12|RPS23|RPL15|RPS2|RPSA|RPS5|RPS11|RPS6|RPL23|RPS7|RPS16|RPL18|RPL26|RPS17|RPLP0|RPL21|RPL19	39	0.9642857142857143	GO_NCRNA_METABOLIC_PROCESS (Geneset_Overlap_Data Set 1) GO_RRNA_METABOLIC_PROCESS	false	Geneset_Overlap	GO_NCRNA_METABOLIC_PROCESS (Geneset_Overlap_Data Set 1) GO_RRNA_METABOLIC_PROCESS
RPS8|RPL22|RPS14|RPS19|RPS4X|RPL31|RPS29|RPS3|RPS9|RPL10A|RPS18|RPL7|RPS12|RPS25|RPL27|RPS3A|RPL11|RPL6|RPL13A|RPLP2|RPS13|RPS15A|RPL12|RPS23|RPL15|RPS2|RPSA|RPS5|RPS11|RPS6|RPL23|RPS7|RPS16|RPL18|RPL26|RPS17|RPLP0|RPL21|RPL19	39	0.8063909774436091	GO_NCRNA_METABOLIC_PROCESS (Geneset_Overlap_Data Set 1) GO_PROTEIN_LOCALIZATION_TO_ORGANELLE	false	Geneset_Overlap	GO_NCRNA_METABOLIC_PROCESS (Geneset_Overlap_Data Set 1) GO_PROTEIN_LOCALIZATION_TO_ORGANELLE
SYN1|GNAQ|GNB1|APOE|SNCA|SNCB|VAMP2|SLC6A1|STX1A|MYO5A|STXBP1|SYT1|CTNNB1|SLC1A3	14	0.4154040404040404	GO_NEURON_PROJECTION (Geneset_Overlap_Data Set 1) GO_SYNAPTIC_SIGNALING	false	Geneset_Overlap	GO_NEURON_PROJECTION (Geneset_Overlap_Data Set 1) GO_SYNAPTIC_SIGNALING
RPS11|RPSA|RPS2|RPL15|RPL23|RPL19|RPL21|RPS17|RPLP0|RPS4X|RPS14|RPS19|RPL22|RPS18|RPL7|RPL10A|RPS29|RPL6|RPL13A|RPL27|RPS3A|RPS12|RPS25|RPS15A|RPS6|RPS5|RPS7|RPL18|RPS16|RPL26|RPL31|RPS8|RPS9|RPS3|RPL11|RPS23|RPL12|RPS13|RPLP2	39	0.75	GO_ORGANONITROGEN_COMPOUND_BIOSYNTHETIC_PROCESS (Geneset_Overlap_Data Set 1) GO_RRNA_METABOLIC_PROCESS	false	Geneset_Overlap	GO_ORGANONITROGEN_COMPOUND_BIOSYNTHETIC_PROCESS (Geneset_Overlap_Data Set 1) GO_RRNA_METABOLIC_PROCESS
RPS11|RPSA|RPS2|RPL15|RPL23|RPL19|RPL21|RPS17|RPLP0|RPS4X|RPS14|RPS19|RPL22|RPS18|RPL7|RPL10A|RPS29|RPL6|RPL13A|RPL27|RPS3A|RPS12|RPS25|RPS15A|RPS6|RPS5|GARS|RPS7|RPL18|RPS16|RPL26|RPL31|RPS8|RPS9|RPS3|RPL11|RPS23|RPL12|RPS13|RPLP2	40	0.7261904761904762	GO_ORGANONITROGEN_COMPOUND_BIOSYNTHETIC_PROCESS (Geneset_Overlap_Data Set 1) GO_NCRNA_METABOLIC_PROCESS	false	Geneset_Overlap	GO_ORGANONITROGEN_COMPOUND_BIOSYNTHETIC_PROCESS (Geneset_Overlap_Data Set 1) GO_NCRNA_METABOLIC_PROCESS
RPS11|RPSA|RPS2|RPL15|RPL23|RPL19|RPL21|RPS17|RPLP0|RPS4X|RPS14|RPS19|RPL22|RPS18|RPL7|RPL10A|RPS29|RPL6|RPL13A|RPL27|RPS3A|RPS12|RPS25|RPS15A|RPS6|RPS5|RPS7|RPL18|RPS16|RPL26|RPL31|RPS8|VAPA|RPS9|RPS3|RPL11|RPS23|RPL12|RPS13|RPLP2	40	0.5877616747181964	GO_ORGANONITROGEN_COMPOUND_BIOSYNTHETIC_PROCESS (Geneset_Overlap_Data Set 1) GO_PROTEIN_LOCALIZATION_TO_ORGANELLE	false	Geneset_Overlap	GO_ORGANONITROGEN_COMPOUND_BIOSYNTHETIC_PROCESS (Geneset_Overlap_Data Set 1) GO_PROTEIN_LOCALIZATION_TO_ORGANELLE
RPS23|RPL10A|RPS18|RPL7|RPS9|RPS15A|RPL12|RPS29|RPS7|RPS3|RPS13|RPL21|RPL19|RPL26|RPS17|RPL23|RPLP0|RPLP2|RPL18|RPL31|RPS11|RPL6|RPL13A|RPS6|RPS4X|RPL11|RPS16|RPS5|RPL27|RPS14|RPS19|RPSA|RPS3A|RPS8|RPS2|RPS12|RPL15|RPL22	38	0.9395604395604396	GO_STRUCTURAL_CONSTITUENT_OF_RIBOSOME (Geneset_Overlap_Data Set 1) GO_ESTABLISHMENT_OF_PROTEIN_LOCALIZATION_TO_ENDOPLASMIC_RETICULUM	false	Geneset_Overlap	GO_STRUCTURAL_CONSTITUENT_OF_RIBOSOME (Geneset_Overlap_Data Set 1) GO_ESTABLISHMENT_OF_PROTEIN_LOCALIZATION_TO_ENDOPLASMIC_RETICULUM
RPL10A|RPL7|RPL12|RPL21|RPL19|RPL26|RPL23|RPLP0|RPLP2|RPL18|RPL31|RPL6|RPL13A|RPL11|RPL27|RPL15|RPL22	17	0.7073170731707317	GO_STRUCTURAL_CONSTITUENT_OF_RIBOSOME (Geneset_Overlap_Data Set 1) GO_LARGE_RIBOSOMAL_SUBUNIT	false	Geneset_Overlap	GO_STRUCTURAL_CONSTITUENT_OF_RIBOSOME (Geneset_Overlap_Data Set 1) GO_LARGE_RIBOSOMAL_SUBUNIT
RPS23|RPL10A|RPS18|RPL7|RPS9|RPS15A|RPL12|RPS29|RPS7|RPS3|RPS13|RPL21|RPL19|RPL26|RPS17|RPL23|RPLP0|RPLP2|RPL18|RPL31|RPS11|RPL6|RPL13A|RPS6|RPS4X|RPL11|RPS16|RPS5|RPL27|RPS14|RPS19|RPSA|RPS3A|RPS8|RPS2|RPS12|RPL15|RPL22	38	0.8856368563685637	GO_STRUCTURAL_CONSTITUENT_OF_RIBOSOME (Geneset_Overlap_Data Set 1) GO_NCRNA_METABOLIC_PROCESS	false	Geneset_Overlap	GO_STRUCTURAL_CONSTITUENT_OF_RIBOSOME (Geneset_Overlap_Data Set 1) GO_NCRNA_METABOLIC_PROCESS
RPS23|RPL10A|RPS18|RPL7|RPS9|RPS15A|RPL12|RPS29|RPS7|RPS3|RPS13|RPL21|RPL19|RPL26|RPS17|RPL23|RPLP0|RPLP2|RPL18|RPL31|RPS11|RPL6|RPL13A|RPS6|RPS4X|RPL11|RPS16|RPS5|RPL27|RPS14|RPS19|RPSA|RPS3A|RPS8|RPS2|RPS12|RPL15|RPL22	38	0.9395604395604396	GO_STRUCTURAL_CONSTITUENT_OF_RIBOSOME (Geneset_Overlap_Data Set 1) GO_RRNA_METABOLIC_PROCESS	false	Geneset_Overlap	GO_STRUCTURAL_CONSTITUENT_OF_RIBOSOME (Geneset_Overlap_Data Set 1) GO_RRNA_METABOLIC_PROCESS
RPS23|RPL10A|RPS18|RPL7|RPS9|RPS15A|SLC25A1|RPL12|SLC25A4|RPS29|RPS7|RPS3|RPS13|RPL21|RPL19|RPL26|RPS17|SLC25A3|RPL23|RPLP0|RPLP2|RPL18|RPL31|RPS11|RPL6|RPL13A|RPS6|RPS4X|RPL11|RPS16|RPS5|RPL27|RPS14|RPS19|RPSA|RPS3A|RPS8|RPS2|RPS12|RPL15|RPL22	41	0.7628205128205128	GO_STRUCTURAL_CONSTITUENT_OF_RIBOSOME (Geneset_Overlap_Data Set 1) GO_ORGANONITROGEN_COMPOUND_BIOSYNTHETIC_PROCESS	false	Geneset_Overlap	GO_STRUCTURAL_CONSTITUENT_OF_RIBOSOME (Geneset_Overlap_Data Set 1) GO_ORGANONITROGEN_COMPOUND_BIOSYNTHETIC_PROCESS
RPS23|RPL10A|RPS18|RPL7|RPS9|RPS15A|RPL12|RPS29|RPS7|RPS3|RPS13|RPL21|RPL19|RPL26|RPS17|RPL23|RPLP0|RPLP2|RPL18|RPL31|RPS11|RPL6|RPL13A|RPS6|RPS4X|RPL11|RPS16|RPS5|RPL27|RPS14|RPS19|RPSA|RPS3A|RPS8|RPS2|RPS12|RPL15|RPL22	38	0.7512934220251294	GO_STRUCTURAL_CONSTITUENT_OF_RIBOSOME (Geneset_Overlap_Data Set 1) GO_MACROMOLECULE_CATABOLIC_PROCESS	false	Geneset_Overlap	GO_STRUCTURAL_CONSTITUENT_OF_RIBOSOME (Geneset_Overlap_Data Set 1) GO_MACROMOLECULE_CATABOLIC_PROCESS
RPS23|RPL10A|RPS18|RPL7|RPS9|RPS15A|RPL12|RPS29|RPS7|RPS3|RPS13|RPL21|RPL19|RPL26|RPS17|RPL23|RPLP0|RPLP2|RPL18|RPL31|RPS11|RPL6|RPL13A|RPS6|RPS4X|RPL11|RPS16|RPS5|RPL27|RPS14|RPS19|RPSA|RPS3A|RPS8|RPS2|RPS12|RPL15|RPL22	38	0.7967479674796748	GO_STRUCTURAL_CONSTITUENT_OF_RIBOSOME (Geneset_Overlap_Data Set 1) GO_PROTEIN_LOCALIZATION_TO_ORGANELLE	false	Geneset_Overlap	GO_STRUCTURAL_CONSTITUENT_OF_RIBOSOME (Geneset_Overlap_Data Set 1) GO_PROTEIN_LOCALIZATION_TO_ORGANELLE
RPL22|RPS25|RPLP0|RPLP2|RPS8|RPL26|RPS2|RPS17|RPS12|RPL15|RPL23|RPS13|RPL21|RPS19|RPL19|RPSA|RPS3A|RPL27|RPS29|RPS14|RPS7|RPS3|RPL12|RPS16|RPS5|RPS9|RPS4X|RPS15A|RPL11|RPS11|RPL31|RPL6|RPL13A|RPS6|RPL18|RPS23|RPL10A|RPS18|RPL7	39	1.0	GO_ESTABLISHMENT_OF_PROTEIN_LOCALIZATION_TO_ENDOPLASMIC_RETICULUM (Geneset_Overlap_Data Set 1) GO_RRNA_METABOLIC_PROCESS	false	Geneset_Overlap	GO_ESTABLISHMENT_OF_PROTEIN_LOCALIZATION_TO_ENDOPLASMIC_RETICULUM (Geneset_Overlap_Data Set 1) GO_RRNA_METABOLIC_PROCESS
RPL22|RPS25|RPLP0|RPLP2|RPS8|RPL26|RPS2|RPS17|RPS12|RPL15|RPL23|RPS13|RPL21|RPS19|RPL19|RPSA|RPS3A|RPL27|RPS29|RPS14|RPS7|RPS3|RPL12|RPS16|RPS5|RPS9|RPS4X|RPS15A|RPL11|RPS11|RPL31|RPL6|RPL13A|RPS6|RPL18|RPS23|RPL10A|RPS18|RPL7	39	0.75	GO_ESTABLISHMENT_OF_PROTEIN_LOCALIZATION_TO_ENDOPLASMIC_RETICULUM (Geneset_Overlap_Data Set 1) GO_ORGANONITROGEN_COMPOUND_BIOSYNTHETIC_PROCESS	false	Geneset_Overlap	GO_ESTABLISHMENT_OF_PROTEIN_LOCALIZATION_TO_ENDOPLASMIC_RETICULUM (Geneset_Overlap_Data Set 1) GO_ORGANONITROGEN_COMPOUND_BIOSYNTHETIC_PROCESS
RPL22|RPLP0|RPLP2|RPL26|RPL15|RPL23|RPL21|RPL19|RPL27|RPL12|RPL11|RPL31|RPL6|RPL13A|RPL18|RPL10A|RPL7	17	0.717948717948718	GO_ESTABLISHMENT_OF_PROTEIN_LOCALIZATION_TO_ENDOPLASMIC_RETICULUM (Geneset_Overlap_Data Set 1) GO_LARGE_RIBOSOMAL_SUBUNIT	false	Geneset_Overlap	GO_ESTABLISHMENT_OF_PROTEIN_LOCALIZATION_TO_ENDOPLASMIC_RETICULUM (Geneset_Overlap_Data Set 1) GO_LARGE_RIBOSOMAL_SUBUNIT
RPL22|RPS25|RPLP0|RPLP2|RPS8|RPL26|RPS2|RPS17|RPS12|RPL15|RPL23|RPS13|RPL21|RPS19|RPL19|RPSA|RPS3A|RPL27|RPS29|RPS14|RPS7|RPS3|RPL12|RPS16|RPS5|RPS9|RPS4X|RPS15A|RPL11|RPS11|RPL31|RPL6|RPL13A|RPS6|RPL18|RPS23|RPL10A|RPS18|RPL7	39	0.8611111111111112	GO_ESTABLISHMENT_OF_PROTEIN_LOCALIZATION_TO_ENDOPLASMIC_RETICULUM (Geneset_Overlap_Data Set 1) GO_PROTEIN_LOCALIZATION_TO_ORGANELLE	false	Geneset_Overlap	GO_ESTABLISHMENT_OF_PROTEIN_LOCALIZATION_TO_ENDOPLASMIC_RETICULUM (Geneset_Overlap_Data Set 1) GO_PROTEIN_LOCALIZATION_TO_ORGANELLE
RPL22|RPS25|RPLP0|RPLP2|RPS8|RPL26|RPS2|RPS17|RPS12|RPL15|RPL23|RPS13|RPL21|RPS19|RPL19|RPSA|RPS3A|RPL27|RPS29|RPS14|RPS7|RPS3|RPL12|RPS16|RPS5|RPS9|RPS4X|RPS15A|RPL11|RPS11|RPL31|RPL6|RPL13A|RPS6|RPL18|RPS23|RPL10A|RPS18|RPL7	39	0.8095238095238095	GO_ESTABLISHMENT_OF_PROTEIN_LOCALIZATION_TO_ENDOPLASMIC_RETICULUM (Geneset_Overlap_Data Set 1) GO_MACROMOLECULE_CATABOLIC_PROCESS	false	Geneset_Overlap	GO_ESTABLISHMENT_OF_PROTEIN_LOCALIZATION_TO_ENDOPLASMIC_RETICULUM (Geneset_Overlap_Data Set 1) GO_MACROMOLECULE_CATABOLIC_PROCESS
RPL22|RPS25|RPLP0|RPLP2|RPS8|RPL26|RPS2|RPS17|RPS12|RPL15|RPL23|RPS13|RPL21|RPS19|RPL19|RPSA|RPS3A|RPL27|RPS29|RPS14|RPS7|RPS3|RPL12|RPS16|RPS5|RPS9|RPS4X|RPS15A|RPL11|RPS11|RPL31|RPL6|RPL13A|RPS6|RPL18|RPS23|RPL10A|RPS18|RPL7	39	0.9642857142857143	GO_ESTABLISHMENT_OF_PROTEIN_LOCALIZATION_TO_ENDOPLASMIC_RETICULUM (Geneset_Overlap_Data Set 1) GO_NCRNA_METABOLIC_PROCESS	false	Geneset_Overlap	GO_ESTABLISHMENT_OF_PROTEIN_LOCALIZATION_TO_ENDOPLASMIC_RETICULUM (Geneset_Overlap_Data Set 1) GO_NCRNA_METABOLIC_PROCESS
RPS3|RPS29|RPS9|RPL10A|RPS18|RPL7|RPL22|RPS8|RPS19|RPS14|RPS4X|RPL31|RPLP2|RPS13|RPL12|RPS15A|RPS23|RPS25|RPS12|RPS3A|RPL27|RPL11|RAB7A|RPL6|RPL13A|KPNB1|RPL23|RPS7|RPS2|RPL15|RPSA|RPS5|RPS11|RPS6|RPLP0|RPS17|RPL26|RPL19|RPL21|CTNNB1|RPS16|RPL18	42	0.6688888888888889	GO_MACROMOLECULE_CATABOLIC_PROCESS (Geneset_Overlap_Data Set 1) GO_PROTEIN_LOCALIZATION_TO_ORGANELLE	false	Geneset_Overlap	GO_MACROMOLECULE_CATABOLIC_PROCESS (Geneset_Overlap_Data Set 1) GO_PROTEIN_LOCALIZATION_TO_ORGANELLE
RPL10A|RPL7|RPL22|RPL31|RPLP2|RPL12|RPL27|RPL11|RPL6|RPL13A|RPL23|RPL15|RPLP0|RPL26|RPL19|RPL21|RPL18	17	0.6349206349206349	GO_MACROMOLECULE_CATABOLIC_PROCESS (Geneset_Overlap_Data Set 1) GO_LARGE_RIBOSOMAL_SUBUNIT	false	Geneset_Overlap	GO_MACROMOLECULE_CATABOLIC_PROCESS (Geneset_Overlap_Data Set 1) GO_LARGE_RIBOSOMAL_SUBUNIT
RPS3|RPS29|RPS9|RPL10A|RPS18|RPL7|RPL22|RPS8|RPS19|RPS14|RPS4X|RPL31|RPLP2|RPS13|RPL12|RPS15A|RPS23|RPS25|RPS12|RPS3A|RPL27|RPL11|RPL6|RPL13A|RPL23|RPS7|RPS2|RPL15|RPSA|RPS5|RPS11|RPS6|RPLP0|RPS17|RPL26|RPL19|RPL21|RPS16|RPL18	39	0.7597402597402598	GO_MACROMOLECULE_CATABOLIC_PROCESS (Geneset_Overlap_Data Set 1) GO_NCRNA_METABOLIC_PROCESS	false	Geneset_Overlap	GO_MACROMOLECULE_CATABOLIC_PROCESS (Geneset_Overlap_Data Set 1) GO_NCRNA_METABOLIC_PROCESS
RPS3|RPS29|RPS9|RPL10A|RPS18|RPL7|RPL22|RPS8|RPS19|RPS14|RPS4X|RPL31|RPLP2|RPS13|RPL12|RPS15A|RPS23|RPS25|RPS12|RPS3A|RPL27|RPL11|RPL6|RPL13A|RPL23|RPS7|RPS2|RPL15|RPSA|RPS5|RPS11|RPS6|RPLP0|RPS17|RPL26|RPL19|RPL21|PABPC1|RPS16|RPL18	40	0.5154801194405154	GO_MACROMOLECULE_CATABOLIC_PROCESS (Geneset_Overlap_Data Set 1) GO_ORGANONITROGEN_COMPOUND_BIOSYNTHETIC_PROCESS	false	Geneset_Overlap	GO_MACROMOLECULE_CATABOLIC_PROCESS (Geneset_Overlap_Data Set 1) GO_ORGANONITROGEN_COMPOUND_BIOSYNTHETIC_PROCESS
RPL22|RPS8|RPS2|RPL15|RPSA|RPS19|RPS14|RPS5|RPS4X|RPS11|RPL31|RPS6|RPL23|RPS29|RPS3|RPS7|RPS9|RPL10A|RPL7|RPS18|RPS12|RPS3A|RPL27|RPS16|RPL11|RPL13A|RPL6|RPL18|RPLP0|RPLP2|RPL26|RPS17|RPL21|RPS13|RPL19|RPL12|RPS15A|RPS23	38	0.8511697361871577	GO_RIBONUCLEOPROTEIN_COMPLEX_BIOGENESIS (Geneset_Overlap_Data Set 1) GO_STRUCTURAL_CONSTITUENT_OF_RIBOSOME	false	Geneset_Overlap	GO_RIBONUCLEOPROTEIN_COMPLEX_BIOGENESIS (Geneset_Overlap_Data Set 1) GO_STRUCTURAL_CONSTITUENT_OF_RIBOSOME
RPL22|RPL15|RPL31|RPL23|RPL10A|RPL7|RPL27|RPL11|RPL13A|RPL6|RPL18|RPLP0|RPLP2|RPL26|RPL21|RPL19|RPL12	17	0.6847826086956521	GO_RIBONUCLEOPROTEIN_COMPLEX_BIOGENESIS (Geneset_Overlap_Data Set 1) GO_LARGE_RIBOSOMAL_SUBUNIT	false	Geneset_Overlap	GO_RIBONUCLEOPROTEIN_COMPLEX_BIOGENESIS (Geneset_Overlap_Data Set 1) GO_LARGE_RIBOSOMAL_SUBUNIT
RPL22|RPS8|RPS2|RPL15|RPSA|RPS19|RPS14|RPS5|RPS4X|RPS11|RPL31|RPS6|RPL23|RPS29|RPS3|RPS7|RPS9|RPL10A|RPL7|RPS18|RPS25|RPS12|RPS3A|RPL27|RPS16|RPL11|RPL13A|RPL6|RPL18|RPLP0|RPLP2|RPL26|RPS17|RPL21|RPS13|RPL19|RPL12|RPS15A|RPS23	39	0.9239130434782609	GO_RIBONUCLEOPROTEIN_COMPLEX_BIOGENESIS (Geneset_Overlap_Data Set 1) GO_RRNA_METABOLIC_PROCESS	false	Geneset_Overlap	GO_RIBONUCLEOPROTEIN_COMPLEX_BIOGENESIS (Geneset_Overlap_Data Set 1) GO_RRNA_METABOLIC_PROCESS
RPL22|RPS8|RPS2|RPL15|RPSA|RPS19|RPS14|RPS5|RPS4X|RPS11|RPL31|RPS6|RPL23|RPS29|RPS3|RPS7|RPS9|RPL10A|RPL7|RPS18|RPS25|RPS12|RPS3A|RPL27|RPS16|RPL11|RPL13A|RPL6|RPL18|RPLP0|RPLP2|RPL26|RPS17|RPL21|RPS13|RPL19|RPL12|RPS15A|RPS23	39	0.8622448979591837	GO_RIBONUCLEOPROTEIN_COMPLEX_BIOGENESIS (Geneset_Overlap_Data Set 1) GO_NCRNA_METABOLIC_PROCESS	false	Geneset_Overlap	GO_RIBONUCLEOPROTEIN_COMPLEX_BIOGENESIS (Geneset_Overlap_Data Set 1) GO_NCRNA_METABOLIC_PROCESS
RPL22|EIF3A|RPS8|RPS2|RPL15|RPSA|RPS19|RPS14|RPS5|RPS4X|RPS11|RPL31|RPS6|RPL23|RPS29|RPS3|RPS7|RPS9|RPL10A|RPL7|RPS18|RPS25|RPS12|RPS3A|RPL27|RPS16|RPL11|RPL13A|RPL6|RPL18|RPLP0|RPLP2|RPL26|RPS17|RPL21|RPS13|RPL19|RPL12|RPS15A|EIF3C|RPS23	41	0.6926401257202723	GO_RIBONUCLEOPROTEIN_COMPLEX_BIOGENESIS (Geneset_Overlap_Data Set 1) GO_ORGANONITROGEN_COMPOUND_BIOSYNTHETIC_PROCESS	false	Geneset_Overlap	GO_RIBONUCLEOPROTEIN_COMPLEX_BIOGENESIS (Geneset_Overlap_Data Set 1) GO_ORGANONITROGEN_COMPOUND_BIOSYNTHETIC_PROCESS
RPL22|RPS8|RPS2|RPL15|RPSA|RPS19|RPS14|RPS5|RPS4X|RPS11|RPL31|RPS6|RPL23|C1QBP|RPS29|RPS3|RPS7|RPS9|RPL10A|RPL7|RPS18|RPS25|RPS12|RPS3A|RPL27|RPS16|RPL11|RPL13A|RPL6|RPL18|RPLP0|RPLP2|RPL26|RPS17|RPL21|RPS13|RPL19|RPL12|RPS15A|RPS23	40	0.7626514611546685	GO_RIBONUCLEOPROTEIN_COMPLEX_BIOGENESIS (Geneset_Overlap_Data Set 1) GO_RNA_PROCESSING	false	Geneset_Overlap	GO_RIBONUCLEOPROTEIN_COMPLEX_BIOGENESIS (Geneset_Overlap_Data Set 1) GO_RNA_PROCESSING
RPL22|RPS8|RPS2|RPL15|RPSA|RPS19|RPS14|RPS5|RPS4X|XPO1|RPS11|RPL31|RPS6|RPL23|RPS29|RPS3|RPS7|RPS9|RPL10A|RPL7|RPS18|RPS25|RPS12|RPS3A|RPL27|RPS16|RPL11|RPL13A|RPL6|RPL18|RPLP0|RPLP2|RPL26|RPS17|RAN|RPL21|RPS13|RPL19|RPL12|RPS15A|RPS23	41	0.7931098010316875	GO_RIBONUCLEOPROTEIN_COMPLEX_BIOGENESIS (Geneset_Overlap_Data Set 1) GO_PROTEIN_LOCALIZATION_TO_ORGANELLE	false	Geneset_Overlap	GO_RIBONUCLEOPROTEIN_COMPLEX_BIOGENESIS (Geneset_Overlap_Data Set 1) GO_PROTEIN_LOCALIZATION_TO_ORGANELLE
RPL22|RPS8|RPS2|RPL15|RPSA|RPS19|RPS14|RPS5|RPS4X|RPS11|RPL31|RPS6|RPL23|RPS29|RPS3|RPS7|RPS9|RPL10A|RPL7|RPS18|RPS25|RPS12|RPS3A|RPL27|RPS16|RPL11|RPL13A|RPL6|RPL18|RPLP0|RPLP2|RPL26|RPS17|RPL21|RPS13|RPL19|RPL12|RPS15A|RPS23	39	0.9239130434782609	GO_RIBONUCLEOPROTEIN_COMPLEX_BIOGENESIS (Geneset_Overlap_Data Set 1) GO_ESTABLISHMENT_OF_PROTEIN_LOCALIZATION_TO_ENDOPLASMIC_RETICULUM	false	Geneset_Overlap	GO_RIBONUCLEOPROTEIN_COMPLEX_BIOGENESIS (Geneset_Overlap_Data Set 1) GO_ESTABLISHMENT_OF_PROTEIN_LOCALIZATION_TO_ENDOPLASMIC_RETICULUM
RPL22|RPS8|RPS2|RPL15|RPSA|RPS19|RPS14|RPS5|RPS4X|RPS11|RPL31|RPS6|RPL23|RPS29|RPS3|RPS7|RPS9|RPL10A|RPL7|RPS18|RPS25|RPS12|RPS3A|RPL27|RPS16|RPL11|RPL13A|RPL6|RPL18|RPLP0|RPLP2|RPL26|RPS17|RPL21|RPS13|RPL19|RPL12|RPS15A|RPS23	39	0.7024844720496894	GO_RIBONUCLEOPROTEIN_COMPLEX_BIOGENESIS (Geneset_Overlap_Data Set 1) GO_MACROMOLECULE_CATABOLIC_PROCESS	false	Geneset_Overlap	GO_RIBONUCLEOPROTEIN_COMPLEX_BIOGENESIS (Geneset_Overlap_Data Set 1) GO_MACROMOLECULE_CATABOLIC_PROCESS
RAB7A|PPP1R9B|STX1A|NSF|ATP1A3|VAMP2|STXBP1|GAP43|VDAC1|MYH10|CADPS|SLC1A3|ARF1|PFN2|ATP2B1|DCLK1|SYN1|RAB11B|SV2A|VDAC2|ERC1|CANX|GPM6A|MAP1B|SYT1|PPP1CC|MAPT|RTN4|CALB1|HSPA8|HNRNPK|MARCKS|ITGB1|SNCA|SNCB|STX1B	36	0.9090909090909092	GO_SYNAPSE_PART (Geneset_Overlap_Data Set 1) GO_SYNAPSE	false	Geneset_Overlap	GO_SYNAPSE_PART (Geneset_Overlap_Data Set 1) GO_SYNAPSE
RAB7A|PPP1R9B|STX1A|NSF|ATP1A3|VAMP2|STXBP1|GAP43|MYH10|SLC1A3|ARF1|PFN2|ATP2B1|SYN1|SV2A|CANX|GPM6A|MAP1B|SYT1|PPP1CC|MAPT|CALB1|HNRNPK|MARCKS|ITGB1|SNCA|SNCB	27	0.559931506849315	GO_SYNAPSE_PART (Geneset_Overlap_Data Set 1) GO_NEURON_PROJECTION	false	Geneset_Overlap	GO_SYNAPSE_PART (Geneset_Overlap_Data Set 1) GO_NEURON_PROJECTION
STX1A|VAMP2|STXBP1|VDAC1|CADPS|SLC1A3|SYN1|SYT1|HSPA8|SNCA|SNCB|STX1B	12	0.4031620553359684	GO_SYNAPSE_PART (Geneset_Overlap_Data Set 1) GO_SYNAPTIC_SIGNALING	false	Geneset_Overlap	GO_SYNAPSE_PART (Geneset_Overlap_Data Set 1) GO_SYNAPTIC_SIGNALING
SV2A|ATP2B1|PFN2|SYN1|MPST|PFN1|STX1A|VAMP2|ATP1A3|NSF|STXBP1|ARPC2|RAB7A|PPP1R9B|MYH10|SLC1A3|ARF1|GAP43|CALB1|SNCB|HNRNPK|MARCKS|ITGB1|SNCA|GPM6A|MAP1B|CANX|CTNNB1|PPP1CC|MAPT|SYT1	31	0.5535714285714286	GO_SYNAPSE (Geneset_Overlap_Data Set 1) GO_NEURON_PROJECTION	false	Geneset_Overlap	GO_SYNAPSE (Geneset_Overlap_Data Set 1) GO_NEURON_PROJECTION
SYN1|STX1A|VAMP2|STXBP1|VDAC1|SLC1A3|CADPS|SNCB|STX1B|HSPA8|SNCA|CTNNB1|SYT1	13	0.41809605488850776	GO_SYNAPSE (Geneset_Overlap_Data Set 1) GO_SYNAPTIC_SIGNALING	false	Geneset_Overlap	GO_SYNAPSE (Geneset_Overlap_Data Set 1) GO_SYNAPTIC_SIGNALING
RPS8|RPL26|RPS2|RPS12|RPS17|RPL15|RPL23|RPL22|RPS25|RPLP0|RPLP2|RPL27|RPS29|RPS14|RPS7|RPS3|RPS13|RPL21|RPS19|RPL19|RPSA|RPS3A|RPS9|RPS4X|RPS15A|RPL11|RPL12|RPS16|RPS5|RPL18|RPS23|RPL10A|RPS18|RPL7|RPL31|RPS11|RPL6|RPL13A|RPS6	39	0.8420454545454545	GO_NUCLEAR_TRANSCRIBED_MRNA_CATABOLIC_PROCESS_NONSENSE_MEDIATED_DECAY (Geneset_Overlap_Data Set 1) GO_PROTEIN_LOCALIZATION_TO_ORGANELLE	false	Geneset_Overlap	GO_NUCLEAR_TRANSCRIBED_MRNA_CATABOLIC_PROCESS_NONSENSE_MEDIATED_DECAY (Geneset_Overlap_Data Set 1) GO_PROTEIN_LOCALIZATION_TO_ORGANELLE
RPS8|RPL26|RPS2|RPS12|RPS17|RPL15|RPL23|RPL22|RPS25|RPLP0|RPLP2|RPL27|RPS29|RPS14|RPS7|RPS3|RPS13|RPL21|RPS19|RPL19|RPSA|RPS3A|RPS9|RPS4X|RPS15A|RPL11|RPL12|RPS16|RPS5|RPL18|RPS23|RPL10A|RPS18|RPL7|RPL31|RPS11|RPL6|RPL13A|RPS6	39	0.9023936170212765	GO_NUCLEAR_TRANSCRIBED_MRNA_CATABOLIC_PROCESS_NONSENSE_MEDIATED_DECAY (Geneset_Overlap_Data Set 1) GO_RIBONUCLEOPROTEIN_COMPLEX_BIOGENESIS	false	Geneset_Overlap	GO_NUCLEAR_TRANSCRIBED_MRNA_CATABOLIC_PROCESS_NONSENSE_MEDIATED_DECAY (Geneset_Overlap_Data Set 1) GO_RIBONUCLEOPROTEIN_COMPLEX_BIOGENESIS
RPS8|RPL26|RPS2|RPS12|RPS17|RPL15|RPL23|RPL22|RPS25|RPLP0|RPLP2|RPL27|RPS29|RPS14|RPS7|RPS3|RPS13|RPL21|RPS19|RPL19|RPSA|RPS3A|RPS9|RPS4X|RPS15A|RPL11|RPL12|RPS16|RPS5|RPL18|RPS23|RPL10A|RPS18|RPL7|RPL31|RPS11|RPL6|RPL13A|RPS6	39	0.9409883720930232	GO_NUCLEAR_TRANSCRIBED_MRNA_CATABOLIC_PROCESS_NONSENSE_MEDIATED_DECAY (Geneset_Overlap_Data Set 1) GO_NCRNA_METABOLIC_PROCESS	false	Geneset_Overlap	GO_NUCLEAR_TRANSCRIBED_MRNA_CATABOLIC_PROCESS_NONSENSE_MEDIATED_DECAY (Geneset_Overlap_Data Set 1) GO_NCRNA_METABOLIC_PROCESS
RPS8|RPL26|RPS2|RPS12|RPS17|RPL15|RPL23|RPL22|RPS25|RPLP0|RPLP2|RPL27|RPS29|RPS14|RPS7|RPS3|RPS13|RPL21|RPS19|RPL19|RPSA|RPS3A|RPS9|RPS4X|RPS15A|RPL11|RPL12|RPS16|RPS5|RPL18|RPS23|RPL10A|PABPC1|RPS18|RPL7|RPL31|RPS11|RPL6|RPL13A|RPS6	40	0.8636363636363636	GO_NUCLEAR_TRANSCRIBED_MRNA_CATABOLIC_PROCESS_NONSENSE_MEDIATED_DECAY (Geneset_Overlap_Data Set 1) GO_RNA_PROCESSING	false	Geneset_Overlap	GO_NUCLEAR_TRANSCRIBED_MRNA_CATABOLIC_PROCESS_NONSENSE_MEDIATED_DECAY (Geneset_Overlap_Data Set 1) GO_RNA_PROCESSING
RPL26|RPL15|RPL23|RPL22|RPLP0|RPLP2|RPL27|RPL21|RPL19|RPL11|RPL12|RPL18|RPL10A|RPL7|RPL31|RPL6|RPL13A	17	0.7125	GO_NUCLEAR_TRANSCRIBED_MRNA_CATABOLIC_PROCESS_NONSENSE_MEDIATED_DECAY (Geneset_Overlap_Data Set 1) GO_LARGE_RIBOSOMAL_SUBUNIT	false	Geneset_Overlap	GO_NUCLEAR_TRANSCRIBED_MRNA_CATABOLIC_PROCESS_NONSENSE_MEDIATED_DECAY (Geneset_Overlap_Data Set 1) GO_LARGE_RIBOSOMAL_SUBUNIT
RPS8|RPL26|RPS2|RPS12|RPS17|RPL15|RPL23|RPL22|RPS25|RPLP0|RPLP2|RPL27|RPS29|RPS14|RPS7|RPS3|RPS13|RPL21|RPS19|RPL19|RPSA|RPS3A|RPS9|RPS4X|RPS15A|RPL11|RPL12|RPS16|RPS5|RPL18|RPS23|RPL10A|RPS18|RPL7|RPL31|RPS11|RPL6|RPL13A|RPS6	39	0.9875	GO_NUCLEAR_TRANSCRIBED_MRNA_CATABOLIC_PROCESS_NONSENSE_MEDIATED_DECAY (Geneset_Overlap_Data Set 1) GO_RRNA_METABOLIC_PROCESS	false	Geneset_Overlap	GO_NUCLEAR_TRANSCRIBED_MRNA_CATABOLIC_PROCESS_NONSENSE_MEDIATED_DECAY (Geneset_Overlap_Data Set 1) GO_RRNA_METABOLIC_PROCESS
RPS8|RPL26|RPS2|RPS12|RPS17|RPL15|RPL23|RPL22|RPS25|RPLP0|RPLP2|RPL27|RPS29|RPS14|RPS7|RPS3|RPS13|RPL21|RPS19|RPL19|RPSA|RPS3A|RPS9|RPS4X|RPS15A|RPL11|RPL12|RPS16|RPS5|RPL18|RPS23|RPL10A|PABPC1|RPS18|RPL7|RPL31|RPS11|RPL6|RPL13A|RPS6	40	0.7564102564102564	GO_NUCLEAR_TRANSCRIBED_MRNA_CATABOLIC_PROCESS_NONSENSE_MEDIATED_DECAY (Geneset_Overlap_Data Set 1) GO_ORGANONITROGEN_COMPOUND_BIOSYNTHETIC_PROCESS	false	Geneset_Overlap	GO_NUCLEAR_TRANSCRIBED_MRNA_CATABOLIC_PROCESS_NONSENSE_MEDIATED_DECAY (Geneset_Overlap_Data Set 1) GO_ORGANONITROGEN_COMPOUND_BIOSYNTHETIC_PROCESS
RPS8|RPL26|RPS2|RPS12|RPS17|RPL15|RPL23|RPL22|RPS25|RPLP0|RPLP2|RPL27|RPS29|RPS14|RPS7|RPS3|RPS13|RPL21|RPS19|RPL19|RPSA|RPS3A|RPS9|RPS4X|RPS15A|RPL11|RPL12|RPS16|RPS5|RPL18|RPS23|RPL10A|RPS18|RPL7|RPL31|RPS11|RPL6|RPL13A|RPS6	39	0.9875	GO_NUCLEAR_TRANSCRIBED_MRNA_CATABOLIC_PROCESS_NONSENSE_MEDIATED_DECAY (Geneset_Overlap_Data Set 1) GO_ESTABLISHMENT_OF_PROTEIN_LOCALIZATION_TO_ENDOPLASMIC_RETICULUM	false	Geneset_Overlap	GO_NUCLEAR_TRANSCRIBED_MRNA_CATABOLIC_PROCESS_NONSENSE_MEDIATED_DECAY (Geneset_Overlap_Data Set 1) GO_ESTABLISHMENT_OF_PROTEIN_LOCALIZATION_TO_ENDOPLASMIC_RETICULUM
RPS8|RPL26|RPS2|RPS12|RPS17|RPL15|RPL23|RPL22|RPS25|RPLP0|RPLP2|RPL27|RPS29|RPS14|RPS7|RPS3|RPS13|RPL21|RPS19|RPL19|RPSA|RPS3A|RPS9|RPS4X|RPS15A|RPL11|RPL12|RPS16|RPS5|RPL18|RPS23|RPL10A|PABPC1|RPS18|RPL7|RPL31|RPS11|RPL6|RPL13A|RPS6	40	0.8174603174603174	GO_NUCLEAR_TRANSCRIBED_MRNA_CATABOLIC_PROCESS_NONSENSE_MEDIATED_DECAY (Geneset_Overlap_Data Set 1) GO_MACROMOLECULE_CATABOLIC_PROCESS	false	Geneset_Overlap	GO_NUCLEAR_TRANSCRIBED_MRNA_CATABOLIC_PROCESS_NONSENSE_MEDIATED_DECAY (Geneset_Overlap_Data Set 1) GO_MACROMOLECULE_CATABOLIC_PROCESS
RPS8|RPL26|RPS2|RPS12|RPS17|RPL15|RPL23|RPL22|RPLP0|RPLP2|RPL27|RPS29|RPS14|RPS7|RPS3|RPS13|RPL21|RPS19|RPL19|RPSA|RPS3A|RPS9|RPS4X|RPS15A|RPL11|RPL12|RPS16|RPS5|RPL18|RPS23|RPL10A|RPS18|RPL7|RPL31|RPS11|RPL6|RPL13A|RPS6	38	0.916860465116279	GO_NUCLEAR_TRANSCRIBED_MRNA_CATABOLIC_PROCESS_NONSENSE_MEDIATED_DECAY (Geneset_Overlap_Data Set 1) GO_STRUCTURAL_CONSTITUENT_OF_RIBOSOME	false	Geneset_Overlap	GO_NUCLEAR_TRANSCRIBED_MRNA_CATABOLIC_PROCESS_NONSENSE_MEDIATED_DECAY (Geneset_Overlap_Data Set 1) GO_STRUCTURAL_CONSTITUENT_OF_RIBOSOME
RPS8|RPL26|RPS2|RPS12|RPS17|RPL15|RPL23|RPL22|RPS25|RPLP0|RPLP2|RPL27|RPS29|RPS14|RPS7|RPS3|RPS13|RPL21|RPS19|RPL19|RPSA|RPS3A|RPS9|RPS4X|RPS15A|RPL11|RPL12|RPS16|RPS5|RPL18|RPS23|RPL10A|RPS18|RPL7|RPL31|RPS11|RPL6|RPL13A|RPS6	39	0.8357142857142856	GO_NUCLEAR_TRANSCRIBED_MRNA_CATABOLIC_PROCESS_NONSENSE_MEDIATED_DECAY (Geneset_Overlap_Data Set 1) GO_PROTEIN_TARGETING	false	Geneset_Overlap	GO_NUCLEAR_TRANSCRIBED_MRNA_CATABOLIC_PROCESS_NONSENSE_MEDIATED_DECAY (Geneset_Overlap_Data Set 1) GO_PROTEIN_TARGETING
RPS4X|RPL11|RPS5|RPS16|RPL18|RPL31|RPS11|RPS6|RPL13A|RPL6|RPS8|RPL15|RPS2|RPS12|RPL22|RPS25|EIF3A|RPL27|RPS14|RPSA|RPS19|RPS3A|RPS15A|RPS9|RPL12|RPS23|RPL10A|RPL7|RPS18|RPL26|RPS17|RPL23|RPLP0|RPLP2|RPS29|RPS3|RPS7|RPL21|RPS13|RPL19	40	0.7564102564102564	GO_MULTI_ORGANISM_METABOLIC_PROCESS (Geneset_Overlap_Data Set 1) GO_ORGANONITROGEN_COMPOUND_BIOSYNTHETIC_PROCESS	false	Geneset_Overlap	GO_MULTI_ORGANISM_METABOLIC_PROCESS (Geneset_Overlap_Data Set 1) GO_ORGANONITROGEN_COMPOUND_BIOSYNTHETIC_PROCESS
RPS4X|RPL11|RPS5|RPS16|RPL18|RPL31|RPS11|RPS6|RPL13A|RPL6|RPS8|RPL15|RPS2|RPS12|RPL22|RPS25|RPL27|RPS14|RPSA|RPS19|RPS3A|RPS15A|RPS9|RPL12|RPS23|RPL10A|RPL7|RPS18|RPL26|RPS17|RPL23|RPLP0|RPLP2|RPS29|RPS3|RPS7|RPL21|RPS13|RPL19	39	0.9875	GO_MULTI_ORGANISM_METABOLIC_PROCESS (Geneset_Overlap_Data Set 1) GO_RRNA_METABOLIC_PROCESS	false	Geneset_Overlap	GO_MULTI_ORGANISM_METABOLIC_PROCESS (Geneset_Overlap_Data Set 1) GO_RRNA_METABOLIC_PROCESS
RPS4X|RPL11|RPS5|RPS16|RPL18|RPL31|RPS11|RPS6|RPL13A|RPL6|RPS8|RPL15|RPS2|RPS12|RPL22|RPS25|RPL27|RPS14|RPSA|RPS19|RPS3A|RPS15A|RPS9|RPL12|RPS23|RPL10A|RPL7|RPS18|RPL26|RPS17|RPL23|RPLP0|RPLP2|RPS29|RPS3|RPS7|RPL21|RPS13|RPL19	39	0.9875	GO_MULTI_ORGANISM_METABOLIC_PROCESS (Geneset_Overlap_Data Set 1) GO_ESTABLISHMENT_OF_PROTEIN_LOCALIZATION_TO_ENDOPLASMIC_RETICULUM	false	Geneset_Overlap	GO_MULTI_ORGANISM_METABOLIC_PROCESS (Geneset_Overlap_Data Set 1) GO_ESTABLISHMENT_OF_PROTEIN_LOCALIZATION_TO_ENDOPLASMIC_RETICULUM
RPS4X|RPL11|RPS5|RPS16|RPL18|RPL31|RPS11|RPS6|RPL13A|RPL6|RPS8|RPL15|RPS2|RPS12|RPL22|RPS25|RPL27|RPS14|RPSA|RPS19|RPS3A|RPS15A|RPS9|RPL12|RPS23|RPL10A|RPL7|RPS18|RPL26|RPS17|RPL23|RPLP0|RPLP2|RPS29|RPS3|RPS7|RPL21|RPS13|RPL19	39	0.8357142857142856	GO_MULTI_ORGANISM_METABOLIC_PROCESS (Geneset_Overlap_Data Set 1) GO_PROTEIN_TARGETING	false	Geneset_Overlap	GO_MULTI_ORGANISM_METABOLIC_PROCESS (Geneset_Overlap_Data Set 1) GO_PROTEIN_TARGETING
RPL11|RPL18|RPL31|RPL13A|RPL6|RPL15|RPL22|RPL27|RPL12|RPL10A|RPL7|RPL26|RPL23|RPLP0|RPLP2|RPL21|RPL19	17	0.7125	GO_MULTI_ORGANISM_METABOLIC_PROCESS (Geneset_Overlap_Data Set 1) GO_LARGE_RIBOSOMAL_SUBUNIT	false	Geneset_Overlap	GO_MULTI_ORGANISM_METABOLIC_PROCESS (Geneset_Overlap_Data Set 1) GO_LARGE_RIBOSOMAL_SUBUNIT
RPS4X|RPL11|RPS5|RPS16|RPL18|RPL31|RPS11|RPS6|RPL13A|RPL6|RPS8|RPL15|RPS2|RPS12|RPL22|RPS25|RPL27|RPS14|RPSA|RPS19|RPS3A|RPS15A|RPS9|RPL12|RPS23|RPL10A|RPL7|RPS18|RPL26|RPS17|RPL23|RPLP0|RPLP2|RPS29|RPS3|RPS7|RPL21|RPS13|RPL19	39	0.9409883720930232	GO_MULTI_ORGANISM_METABOLIC_PROCESS (Geneset_Overlap_Data Set 1) GO_NCRNA_METABOLIC_PROCESS	false	Geneset_Overlap	GO_MULTI_ORGANISM_METABOLIC_PROCESS (Geneset_Overlap_Data Set 1) GO_NCRNA_METABOLIC_PROCESS
RPS4X|RPL11|RPS5|RPS16|RPL18|RPL31|RPS11|RPS6|RPL13A|RPL6|RPS8|RPL15|RPS2|RPS12|RPL22|RPS25|EIF3A|RPL27|RPS14|RPSA|RPS19|RPS3A|RPS15A|RPS9|RPL12|RPS23|RPL10A|RPL7|RPS18|RPL26|RPS17|RPL23|RPLP0|RPLP2|RPS29|RPS3|RPS7|RPL21|RPS13|RPL19	40	0.9347826086956521	GO_MULTI_ORGANISM_METABOLIC_PROCESS (Geneset_Overlap_Data Set 1) GO_RIBONUCLEOPROTEIN_COMPLEX_BIOGENESIS	false	Geneset_Overlap	GO_MULTI_ORGANISM_METABOLIC_PROCESS (Geneset_Overlap_Data Set 1) GO_RIBONUCLEOPROTEIN_COMPLEX_BIOGENESIS
RPS4X|RPL11|RPS5|RPS16|RPL18|RPL31|RPS11|RPS6|RPL13A|RPL6|RPS8|RPL15|RPS2|RPS12|RPL22|RPL27|RPS14|RPSA|RPS19|RPS3A|RPS15A|RPS9|RPL12|RPS23|RPL10A|RPL7|RPS18|RPL26|RPS17|RPL23|RPLP0|RPLP2|RPS29|RPS3|RPS7|RPL21|RPS13|RPL19	38	0.916860465116279	GO_MULTI_ORGANISM_METABOLIC_PROCESS (Geneset_Overlap_Data Set 1) GO_STRUCTURAL_CONSTITUENT_OF_RIBOSOME	false	Geneset_Overlap	GO_MULTI_ORGANISM_METABOLIC_PROCESS (Geneset_Overlap_Data Set 1) GO_STRUCTURAL_CONSTITUENT_OF_RIBOSOME
RPS4X|RPL11|RPS5|RPS16|RPL18|RPL31|RPS11|RPS6|RPL13A|RPL6|RPS8|RPL15|RPS2|RPS12|RPL22|RPS25|RPL27|RPS14|RPSA|RPS19|RPS3A|RPS15A|RPS9|RPL12|RPS23|RPL10A|RPL7|RPS18|RPL26|RPS17|RPL23|RPLP0|RPLP2|RPS29|RPS3|RPS7|RPL21|RPS13|RPL19	39	0.963109756097561	GO_MULTI_ORGANISM_METABOLIC_PROCESS (Geneset_Overlap_Data Set 1) GO_NUCLEAR_TRANSCRIBED_MRNA_CATABOLIC_PROCESS_NONSENSE_MEDIATED_DECAY	false	Geneset_Overlap	GO_MULTI_ORGANISM_METABOLIC_PROCESS (Geneset_Overlap_Data Set 1) GO_NUCLEAR_TRANSCRIBED_MRNA_CATABOLIC_PROCESS_NONSENSE_MEDIATED_DECAY
RPS4X|RPL11|RPS5|RPS16|RPL18|RPL31|RPS11|RPS6|RPL13A|RPL6|RPS8|RPL15|RPS2|RPS12|RPL22|RPS25|RPL27|RPS14|RPSA|RPS19|RPS3A|RPS15A|RPS9|RPL12|RPS23|RPL10A|RPL7|RPS18|RPL26|RPS17|RPL23|RPLP0|RPLP2|RPS29|RPS3|RPS7|RPL21|RPS13|RPL19	39	0.8420454545454545	GO_MULTI_ORGANISM_METABOLIC_PROCESS (Geneset_Overlap_Data Set 1) GO_PROTEIN_LOCALIZATION_TO_ORGANELLE	false	Geneset_Overlap	GO_MULTI_ORGANISM_METABOLIC_PROCESS (Geneset_Overlap_Data Set 1) GO_PROTEIN_LOCALIZATION_TO_ORGANELLE
RPS4X|RPL11|RPS5|RPS16|RPL18|RPL31|RPS11|RPS6|RPL13A|RPL6|RPS8|RPL15|RPS2|RPS12|RPL22|RPS25|RPL27|RPS14|RPSA|RPS19|RPS3A|RPS15A|RPS9|RPL12|RPS23|RPL10A|RPL7|RPS18|RPL26|RPS17|RPL23|RPLP0|RPLP2|RPS29|RPS3|RPS7|RPL21|RPS13|RPL19	39	0.7921875	GO_MULTI_ORGANISM_METABOLIC_PROCESS (Geneset_Overlap_Data Set 1) GO_MACROMOLECULE_CATABOLIC_PROCESS	false	Geneset_Overlap	GO_MULTI_ORGANISM_METABOLIC_PROCESS (Geneset_Overlap_Data Set 1) GO_MACROMOLECULE_CATABOLIC_PROCESS
RPL7|RPL10A|RPL23|RPL31|RPL22|RPL15|RPL12|RPLP2|RPLP0|RPL26|RPL19|RPL21|RPL11|RPL13A|RPL6|RPL18|RPL27	17	0.6666666666666666	GO_AMIDE_BIOSYNTHETIC_PROCESS (Geneset_Overlap_Data Set 1) GO_LARGE_RIBOSOMAL_SUBUNIT	false	Geneset_Overlap	GO_AMIDE_BIOSYNTHETIC_PROCESS (Geneset_Overlap_Data Set 1) GO_LARGE_RIBOSOMAL_SUBUNIT
RPS9|RPL7|RPS18|RPL10A|RPL23|RPS3|RPS7|RPS29|RPS5|RPS4X|RPS6|RPS11|RPL31|RPL22|RPL15|RPS2|RPS8|RPSA|RPS19|RPS14|RPL12|RPS15A|PABPC1|RPS23|RPLP2|RPLP0|RPS17|RPL26|RPL19|RPL21|RPS13|RPS16|RPL11|RPL13A|RPL6|RPL18|RPS25|RPS12|RPS3A|RPL27	40	0.6624271330153684	GO_AMIDE_BIOSYNTHETIC_PROCESS (Geneset_Overlap_Data Set 1) GO_MACROMOLECULE_CATABOLIC_PROCESS	false	Geneset_Overlap	GO_AMIDE_BIOSYNTHETIC_PROCESS (Geneset_Overlap_Data Set 1) GO_MACROMOLECULE_CATABOLIC_PROCESS
RPS9|RPL7|RPS18|RPL10A|RPL23|RPS3|RPS7|RPS29|RPS5|RPS4X|RPS6|RPS11|RPL31|RPL22|RPL15|RPS2|RPS8|RPSA|RPS19|RPS14|RPL12|RPS15A|RPS23|RPLP2|RPLP0|RPS17|RPL26|RPL19|RPL21|RPS13|RPS16|RPL11|RPL13A|RPL6|RPL18|RPS25|RPS12|RPS3A|RPL27	39	0.8823529411764706	GO_AMIDE_BIOSYNTHETIC_PROCESS (Geneset_Overlap_Data Set 1) GO_ESTABLISHMENT_OF_PROTEIN_LOCALIZATION_TO_ENDOPLASMIC_RETICULUM	false	Geneset_Overlap	GO_AMIDE_BIOSYNTHETIC_PROCESS (Geneset_Overlap_Data Set 1) GO_ESTABLISHMENT_OF_PROTEIN_LOCALIZATION_TO_ENDOPLASMIC_RETICULUM
RPS9|RPL7|RPS18|RPL10A|RPL23|RPS3|RPS7|RPS29|RPS5|RPS4X|RPS6|RPS11|RPL31|RPL22|RPL15|RPS2|RPS8|GARS|RPSA|RPS19|RPS14|RPL12|RPS15A|RPS23|RPLP2|RPLP0|RPS17|RPL26|RPL19|RPL21|RPS13|RPS16|RPL11|RPL13A|RPL6|RPL18|RPS25|RPS12|RPS3A|RPL27	40	0.8535489667565139	GO_AMIDE_BIOSYNTHETIC_PROCESS (Geneset_Overlap_Data Set 1) GO_NCRNA_METABOLIC_PROCESS	false	Geneset_Overlap	GO_AMIDE_BIOSYNTHETIC_PROCESS (Geneset_Overlap_Data Set 1) GO_NCRNA_METABOLIC_PROCESS
RPS9|RPL7|RPS18|RPL10A|RPL23|RPS3|RPS7|RPS29|RPS5|RPS4X|RPS6|RPS11|RPL31|RPL22|RPL15|RPS2|RPS8|RPSA|RPS19|RPS14|RPL12|RPS15A|RPS23|RPLP2|RPLP0|RPS17|RPL26|RPL19|RPL21|RPS13|RPS16|RPL11|RPL13A|RPL6|RPL18|RPS25|RPS12|RPS3A|RPL27	39	0.677807486631016	GO_AMIDE_BIOSYNTHETIC_PROCESS (Geneset_Overlap_Data Set 1) GO_PROTEIN_LOCALIZATION_TO_ORGANELLE	false	Geneset_Overlap	GO_AMIDE_BIOSYNTHETIC_PROCESS (Geneset_Overlap_Data Set 1) GO_PROTEIN_LOCALIZATION_TO_ORGANELLE
TUFM|EIF5A|RPS9|RPL7|RPS18|EEF1A1|RPL10A|RPL23|ATPIF1|SLC25A3|RPS3|RPS7|EEF2|RPS29|SLC25A4|RPS5|RPS4X|RPS6|RPS11|RPL31|EIF3A|RPL22|RPL15|RPS2|RPS8|GARS|RPSA|RPS19|RPS14|RPL12|EIF3C|SLC25A1|RPS15A|PABPC1|RPS23|RPLP2|RPLP0|RPS17|RPL26|RPL19|RPL21|RPS13|RPS16|RPL11|RPL13A|RPL6|RPL18|RPS25|RPS12|RPS3A|RPL27	51	0.8269230769230769	GO_AMIDE_BIOSYNTHETIC_PROCESS (Geneset_Overlap_Data Set 1) GO_ORGANONITROGEN_COMPOUND_BIOSYNTHETIC_PROCESS	false	Geneset_Overlap	GO_AMIDE_BIOSYNTHETIC_PROCESS (Geneset_Overlap_Data Set 1) GO_ORGANONITROGEN_COMPOUND_BIOSYNTHETIC_PROCESS
RPS9|RPL7|RPS18|RPL10A|RPL23|RPS3|RPS7|RPS29|RPS5|RPS4X|RPS6|RPS11|RPL31|EIF3A|RPL22|RPL15|RPS2|RPS8|RPSA|RPS19|RPS14|RPL12|RPS15A|RPS23|RPLP2|RPLP0|RPS17|RPL26|RPL19|RPL21|RPS13|RPS16|RPL11|RPL13A|RPL6|RPL18|RPS25|RPS12|RPS3A|RPL27	40	0.892156862745098	GO_AMIDE_BIOSYNTHETIC_PROCESS (Geneset_Overlap_Data Set 1) GO_MULTI_ORGANISM_METABOLIC_PROCESS	false	Geneset_Overlap	GO_AMIDE_BIOSYNTHETIC_PROCESS (Geneset_Overlap_Data Set 1) GO_MULTI_ORGANISM_METABOLIC_PROCESS
RPS9|RPL7|RPS18|RPL10A|RPL23|SLC25A3|RPS3|RPS7|RPS29|SLC25A4|RPS5|RPS4X|RPS6|RPS11|RPL31|RPL22|RPL15|RPS2|RPS8|RPSA|RPS19|RPS14|RPL12|SLC25A1|RPS15A|RPS23|RPLP2|RPLP0|RPS17|RPL26|RPL19|RPL21|RPS13|RPS16|RPL11|RPL13A|RPL6|RPL18|RPS12|RPS3A|RPL27	41	0.9019607843137255	GO_AMIDE_BIOSYNTHETIC_PROCESS (Geneset_Overlap_Data Set 1) GO_STRUCTURAL_CONSTITUENT_OF_RIBOSOME	false	Geneset_Overlap	GO_AMIDE_BIOSYNTHETIC_PROCESS (Geneset_Overlap_Data Set 1) GO_STRUCTURAL_CONSTITUENT_OF_RIBOSOME
RPS9|RPL7|RPS18|RPL10A|RPL23|RPS3|RPS7|RPS29|RPS5|RPS4X|RPS6|RPS11|RPL31|EIF3A|RPL22|RPL15|RPS2|RPS8|RPSA|RPS19|RPS14|RPL12|EIF3C|RPS15A|RPS23|RPLP2|RPLP0|RPS17|RPL26|RPL19|RPL21|RPS13|RPS16|RPL11|RPL13A|RPL6|RPL18|RPS25|RPS12|RPS3A|RPL27	41	0.8117236024844721	GO_AMIDE_BIOSYNTHETIC_PROCESS (Geneset_Overlap_Data Set 1) GO_RIBONUCLEOPROTEIN_COMPLEX_BIOGENESIS	false	Geneset_Overlap	GO_AMIDE_BIOSYNTHETIC_PROCESS (Geneset_Overlap_Data Set 1) GO_RIBONUCLEOPROTEIN_COMPLEX_BIOGENESIS
RPS9|RPL7|RPS18|RPL10A|RPL23|RPS3|RPS7|RPS29|RPS5|RPS4X|RPS6|RPS11|RPL31|RPL22|RPL15|RPS2|RPS8|RPSA|RPS19|RPS14|RPL12|RPS15A|RPS23|RPLP2|RPLP0|RPS17|RPL26|RPL19|RPL21|RPS13|RPS16|RPL11|RPL13A|RPL6|RPL18|RPS25|RPS12|RPS3A|RPL27	39	0.6733977172958736	GO_AMIDE_BIOSYNTHETIC_PROCESS (Geneset_Overlap_Data Set 1) GO_PROTEIN_TARGETING	false	Geneset_Overlap	GO_AMIDE_BIOSYNTHETIC_PROCESS (Geneset_Overlap_Data Set 1) GO_PROTEIN_TARGETING
RPS9|RPL7|RPS18|RPL10A|RPL23|RPS3|RPS7|RPS29|RPS5|RPS4X|RPS6|RPS11|RPL31|RPL22|RPL15|RPS2|RPS8|RPSA|RPS19|RPS14|RPL12|RPS15A|PABPC1|RPS23|RPLP2|RPLP0|RPS17|RPL26|RPL19|RPL21|RPS13|RPS16|RPL11|RPL13A|RPL6|RPL18|RPS25|RPS12|RPS3A|RPL27	40	0.892156862745098	GO_AMIDE_BIOSYNTHETIC_PROCESS (Geneset_Overlap_Data Set 1) GO_NUCLEAR_TRANSCRIBED_MRNA_CATABOLIC_PROCESS_NONSENSE_MEDIATED_DECAY	false	Geneset_Overlap	GO_AMIDE_BIOSYNTHETIC_PROCESS (Geneset_Overlap_Data Set 1) GO_NUCLEAR_TRANSCRIBED_MRNA_CATABOLIC_PROCESS_NONSENSE_MEDIATED_DECAY
RPL19|RPL21|RPL18|RPL23|RPS7|RPS2|RPS6|RPS11|RPS13|RPL12|RPS23|RPS3A|RPL11|RPL13A|SLC25A3|RPS3|RPS9|RPL7|RPL10A|RPS19|RPS14	21	0.4471968709256845	GO_NUCLEOLUS (Geneset_Overlap_Data Set 1) GO_STRUCTURAL_CONSTITUENT_OF_RIBOSOME	false	Geneset_Overlap	GO_NUCLEOLUS (Geneset_Overlap_Data Set 1) GO_STRUCTURAL_CONSTITUENT_OF_RIBOSOME
RPL19|RPL21|RPL18|RPL23|RPS7|RPS2|RPS6|RPS11|RPS13|RPL12|RPS23|RPS25|RPS3A|RPL11|RPL13A|RPS3|RPS9|RPL7|RPL10A|RPS19|RPS14	21	0.45344129554655865	GO_NUCLEOLUS (Geneset_Overlap_Data Set 1) GO_ESTABLISHMENT_OF_PROTEIN_LOCALIZATION_TO_ENDOPLASMIC_RETICULUM	false	Geneset_Overlap	GO_NUCLEOLUS (Geneset_Overlap_Data Set 1) GO_ESTABLISHMENT_OF_PROTEIN_LOCALIZATION_TO_ENDOPLASMIC_RETICULUM
RPL19|RPL21|RPL18|RPL23|UBE2N|CTSB|RPS7|RPS2|RPS6|RPS11|RPS13|RPL12|RPS23|RPS25|RPS3A|RPL11|RPL13A|RPS3|RPS9|RPL7|RPL10A|RPS19|RPS14	23	0.44044141512495943	GO_NUCLEOLUS (Geneset_Overlap_Data Set 1) GO_MACROMOLECULE_CATABOLIC_PROCESS	false	Geneset_Overlap	GO_NUCLEOLUS (Geneset_Overlap_Data Set 1) GO_MACROMOLECULE_CATABOLIC_PROCESS
RPL19|RPL21|RPL18|RPL23|RPS7|EEF1A1|EIF3A|RPS2|RPS6|RPS11|RPS13|RPL12|RPS23|RPS25|RPS3A|RPL11|RPL13A|SLC25A3|RPS3|RPS9|RPL7|RPL10A|RPS19|RPS14	24	0.43672456575682383	GO_NUCLEOLUS (Geneset_Overlap_Data Set 1) GO_ORGANONITROGEN_COMPOUND_BIOSYNTHETIC_PROCESS	false	Geneset_Overlap	GO_NUCLEOLUS (Geneset_Overlap_Data Set 1) GO_ORGANONITROGEN_COMPOUND_BIOSYNTHETIC_PROCESS
RPL19|RPL21|RPL18|RPL23|RPS7|RPS2|RPS6|RPS11|RPS13|RPL12|RPS23|RPS25|RPS3A|RPL11|RPL13A|RPS3|RPS9|RPL7|RPL10A|RPS19|RPS14	21	0.4442307692307692	GO_NUCLEOLUS (Geneset_Overlap_Data Set 1) GO_NCRNA_METABOLIC_PROCESS	false	Geneset_Overlap	GO_NUCLEOLUS (Geneset_Overlap_Data Set 1) GO_NCRNA_METABOLIC_PROCESS
RPL19|RPL21|RPL18|RPL23|RPS7|EIF3A|RPS2|RPS6|RPS11|RPS13|RPL12|RPS23|RPS25|RPS3A|RPL11|RPL13A|RPS3|RPS9|RPL7|RPL10A|RPS19|RPS14	22	0.4750337381916329	GO_NUCLEOLUS (Geneset_Overlap_Data Set 1) GO_MULTI_ORGANISM_METABOLIC_PROCESS	false	Geneset_Overlap	GO_NUCLEOLUS (Geneset_Overlap_Data Set 1) GO_MULTI_ORGANISM_METABOLIC_PROCESS
RPL19|RPL21|RPL18|RPL23|RPS7|HSPA8|RPS2|RPS6|RPS11|RAN|RPS13|RPL12|RPS23|RPS25|RPS3A|RPL11|RPL13A|RPS3|RPS9|RPL7|RPL10A|RPS19|RPS14|XPO1	24	0.4816053511705686	GO_NUCLEOLUS (Geneset_Overlap_Data Set 1) GO_PROTEIN_LOCALIZATION_TO_ORGANELLE	false	Geneset_Overlap	GO_NUCLEOLUS (Geneset_Overlap_Data Set 1) GO_PROTEIN_LOCALIZATION_TO_ORGANELLE
RPL19|RPL21|RPL18|RPL23|C1QBP|RPS7|EIF3A|RPS2|RPS6|RPS11|NPM1|RAN|RPS13|RPL12|RPS23|RPS25|RPS3A|RPL11|RPL13A|RPS3|RPS9|RPL7|RPL10A|RPS19|RPS14|XPO1	26	0.5536723163841808	GO_NUCLEOLUS (Geneset_Overlap_Data Set 1) GO_RIBONUCLEOPROTEIN_COMPLEX_BIOGENESIS	false	Geneset_Overlap	GO_NUCLEOLUS (Geneset_Overlap_Data Set 1) GO_RIBONUCLEOPROTEIN_COMPLEX_BIOGENESIS
RPL19|RPL21|RPL18|RPL23|RPS7|EEF1A1|EIF3A|RPS2|RPS6|RPS11|RPS13|RPL12|RPS23|RPS25|RPS3A|RPL11|RPL13A|SLC25A3|RPS3|RPS9|RPL7|RPL10A|RPS19|RPS14	24	0.48951048951048953	GO_NUCLEOLUS (Geneset_Overlap_Data Set 1) GO_AMIDE_BIOSYNTHETIC_PROCESS	false	Geneset_Overlap	GO_NUCLEOLUS (Geneset_Overlap_Data Set 1) GO_AMIDE_BIOSYNTHETIC_PROCESS
RPL19|RPL21|RPL18|RPL23|RPS7|RPS2|RPS6|RPS11|RPS13|RPL12|RPS23|RPS25|RPS3A|RPL11|RPL13A|RPS3|RPS9|RPL7|RPL10A|RPS19|RPS14	21	0.45026525198938994	GO_NUCLEOLUS (Geneset_Overlap_Data Set 1) GO_NUCLEAR_TRANSCRIBED_MRNA_CATABOLIC_PROCESS_NONSENSE_MEDIATED_DECAY	false	Geneset_Overlap	GO_NUCLEOLUS (Geneset_Overlap_Data Set 1) GO_NUCLEAR_TRANSCRIBED_MRNA_CATABOLIC_PROCESS_NONSENSE_MEDIATED_DECAY
RPL19|RPL21|RPL18|RPL23|RPS7|HSPA8|RPS2|RPS6|RPS11|RAN|RPS13|RPL12|RPS23|RPS25|RPS3A|RPL11|RPL13A|RPS3|RPS9|RPL7|RPL10A|RPS19|RPS14	23	0.4568436258577104	GO_NUCLEOLUS (Geneset_Overlap_Data Set 1) GO_PROTEIN_TARGETING	false	Geneset_Overlap	GO_NUCLEOLUS (Geneset_Overlap_Data Set 1) GO_PROTEIN_TARGETING
RPL19|RPL21|RPL18|RPL23|RPS7|RPS2|RPS6|RPS11|RPS13|RPL12|RPS23|RPS25|RPS3A|RPL11|RPL13A|RPS3|RPS9|RPL7|RPL10A|RPS19|RPS14	21	0.41306638566912535	GO_NUCLEOLUS (Geneset_Overlap_Data Set 1) GO_PROTEIN_LOCALIZATION_TO_MEMBRANE	false	Geneset_Overlap	GO_NUCLEOLUS (Geneset_Overlap_Data Set 1) GO_PROTEIN_LOCALIZATION_TO_MEMBRANE
RPL12|RPS15A|RPS23|RPLP0|RPLP2|RPL26|RPS17|RPL21|RPS13|RPL19|RPS16|RPL11|RPL13A|RPL6|RPL18|RPS25|RPS12|RPS3A|RPL27|RPS9|RPL7|RPS18|RPL10A|RPL23|RPS29|RPS3|RPS7|RPS5|RPS4X|RPS6|RPL31|RPS11|RPL22|RPS8|RPL15|RPS2|RPSA|RPS19|RPS14	39	0.6733977172958736	GO_PROTEIN_LOCALIZATION_TO_MEMBRANE (Geneset_Overlap_Data Set 1) GO_AMIDE_BIOSYNTHETIC_PROCESS	false	Geneset_Overlap	GO_PROTEIN_LOCALIZATION_TO_MEMBRANE (Geneset_Overlap_Data Set 1) GO_AMIDE_BIOSYNTHETIC_PROCESS
RPL12|RPS15A|RPS23|RPLP0|RPLP2|RPL26|RPS17|RPL21|RPS13|RPL19|RPS16|RPL11|RPL13A|RPL6|RPL18|RPS25|RPS12|RPS3A|RPL27|RPS9|RPL7|RPS18|RPL10A|RPL23|RPS29|RPS3|RPS7|RPS5|RPS4X|RPS6|RPL31|RPS11|RPL22|RPS8|RPL15|RPS2|RPSA|RPS19|RPS14	39	0.738429172510519	GO_PROTEIN_LOCALIZATION_TO_MEMBRANE (Geneset_Overlap_Data Set 1) GO_RIBONUCLEOPROTEIN_COMPLEX_BIOGENESIS	false	Geneset_Overlap	GO_PROTEIN_LOCALIZATION_TO_MEMBRANE (Geneset_Overlap_Data Set 1) GO_RIBONUCLEOPROTEIN_COMPLEX_BIOGENESIS
RPL12|RPS15A|RPS23|RPLP0|RPLP2|RPL26|RPS17|RPL21|RPS13|RPL19|RPS16|RPL11|RPL13A|RPL6|RPL18|RPS25|RPS12|RPS3A|RPL27|RPS9|RPL7|RPS18|RPL10A|RPL23|RPS29|RPS3|RPS7|RPS5|RPS4X|RPS6|RPL31|RPS11|RPL22|RPS8|RPL15|RPS2|RPSA|RPS19|RPS14	39	0.8357142857142856	GO_PROTEIN_LOCALIZATION_TO_MEMBRANE (Geneset_Overlap_Data Set 1) GO_NUCLEAR_TRANSCRIBED_MRNA_CATABOLIC_PROCESS_NONSENSE_MEDIATED_DECAY	false	Geneset_Overlap	GO_PROTEIN_LOCALIZATION_TO_MEMBRANE (Geneset_Overlap_Data Set 1) GO_NUCLEAR_TRANSCRIBED_MRNA_CATABOLIC_PROCESS_NONSENSE_MEDIATED_DECAY
RPL12|RPS15A|RPS23|RPLP0|RPLP2|RPL26|RPS17|RPL21|RPS13|RPL19|RPS16|RPL11|RPL13A|RPL6|RPL18|RPS25|HSPA4|HSP90AA1|RPS12|RPS3A|RPL27|RPS9|RPL7|RPS18|RPL10A|RPL23|TOMM22|RPS29|RPS3|RPS7|RPS5|RPS4X|RPS6|RPL31|RPS11|RPL22|RPS8|RPL15|RPS2|RPSA|RPS19|RPS14	42	0.7023217247097844	GO_PROTEIN_LOCALIZATION_TO_MEMBRANE (Geneset_Overlap_Data Set 1) GO_PROTEIN_LOCALIZATION_TO_ORGANELLE	false	Geneset_Overlap	GO_PROTEIN_LOCALIZATION_TO_MEMBRANE (Geneset_Overlap_Data Set 1) GO_PROTEIN_LOCALIZATION_TO_ORGANELLE
RPL12|RPS15A|RPS23|RPLP0|RPLP2|RPL26|RPS17|RPL21|RPS13|RPL19|RPS16|RPL11|RPL13A|RPL6|RPL18|RPS25|HSPA4|HSP90AA1|RPS12|SSR1|RPS3A|RPL27|ANXA2|RPS9|RPL7|RPS18|RPL10A|RPL23|TOMM22|RPS29|RPS3|RPS7|RPS5|RPS4X|RPS6|RPL31|RPS11|RPL22|RPS8|RPL15|RPS2|RPSA|RPS19|RPS14	44	0.7333333333333334	GO_PROTEIN_LOCALIZATION_TO_MEMBRANE (Geneset_Overlap_Data Set 1) GO_PROTEIN_TARGETING	false	Geneset_Overlap	GO_PROTEIN_LOCALIZATION_TO_MEMBRANE (Geneset_Overlap_Data Set 1) GO_PROTEIN_TARGETING
RPL12|RPS15A|RPS23|RPLP0|RPLP2|RPL26|RPS17|RPL21|RPS13|RPL19|RPS16|RPL11|RPL13A|RPL6|RPL18|RPS25|RPS12|RPS3A|RPL27|RPS9|APOE|RPL7|RPS18|RPL10A|RPL23|RPS29|RPS3|RPS7|RPS5|RPS4X|RPS6|RPL31|RPS11|RPL22|RPS8|RPL15|RPS2|RPSA|RPS19|RPS14	40	0.62004662004662	GO_PROTEIN_LOCALIZATION_TO_MEMBRANE (Geneset_Overlap_Data Set 1) GO_MACROMOLECULE_CATABOLIC_PROCESS	false	Geneset_Overlap	GO_PROTEIN_LOCALIZATION_TO_MEMBRANE (Geneset_Overlap_Data Set 1) GO_MACROMOLECULE_CATABOLIC_PROCESS
RPL12|RPS15A|RPS23|RPLP0|RPLP2|RPL26|RPS17|RPL21|RPS13|RPL19|RPS16|RPL11|RPL13A|RPL6|RPL18|RPS12|RPS3A|RPL27|RPS9|RPL7|RPS18|RPL10A|RPL23|RPS29|RPS3|RPS7|RPS5|RPS4X|RPS6|RPL31|RPS11|RPL22|RPS8|RPL15|RPS2|RPSA|RPS19|RPS14	38	0.7910008410428933	GO_PROTEIN_LOCALIZATION_TO_MEMBRANE (Geneset_Overlap_Data Set 1) GO_STRUCTURAL_CONSTITUENT_OF_RIBOSOME	false	Geneset_Overlap	GO_PROTEIN_LOCALIZATION_TO_MEMBRANE (Geneset_Overlap_Data Set 1) GO_STRUCTURAL_CONSTITUENT_OF_RIBOSOME
RPL12|RPS15A|RPS23|RPLP0|RPLP2|RPL26|RPS17|RPL21|RPS13|RPL19|RPS16|RPL11|RPL13A|RPL6|RPL18|RPS25|RPS12|RPS3A|RPL27|RPS9|RPL7|RPS18|RPL10A|RPL23|RPS29|RPS3|RPS7|RPS5|RPS4X|RPS6|RPL31|RPS11|RPL22|RPS8|RPL15|RPS2|RPSA|RPS19|RPS14	39	0.8545454545454545	GO_PROTEIN_LOCALIZATION_TO_MEMBRANE (Geneset_Overlap_Data Set 1) GO_ESTABLISHMENT_OF_PROTEIN_LOCALIZATION_TO_ENDOPLASMIC_RETICULUM	false	Geneset_Overlap	GO_PROTEIN_LOCALIZATION_TO_MEMBRANE (Geneset_Overlap_Data Set 1) GO_ESTABLISHMENT_OF_PROTEIN_LOCALIZATION_TO_ENDOPLASMIC_RETICULUM
RPL12|RPLP0|RPLP2|RPL26|RPL21|RPL19|RPL11|RPL13A|RPL6|RPL18|RPL27|RPL7|RPL10A|RPL23|RPL31|RPL22|RPL15	17	0.6545454545454545	GO_PROTEIN_LOCALIZATION_TO_MEMBRANE (Geneset_Overlap_Data Set 1) GO_LARGE_RIBOSOMAL_SUBUNIT	false	Geneset_Overlap	GO_PROTEIN_LOCALIZATION_TO_MEMBRANE (Geneset_Overlap_Data Set 1) GO_LARGE_RIBOSOMAL_SUBUNIT
RPL12|RPS15A|RPS23|RPLP0|RPLP2|RPL26|RPS17|RPL21|RPS13|RPL19|RPS16|RPL11|RPL13A|RPL6|RPL18|RPS25|RPS12|RPS3A|RPL27|RPS9|RPL7|RPS18|RPL10A|RPL23|RPS29|RPS3|RPS7|RPS5|RPS4X|RPS6|RPL31|RPS11|RPL22|RPS8|RPL15|RPS2|RPSA|RPS19|RPS14	39	0.8004926108374384	GO_PROTEIN_LOCALIZATION_TO_MEMBRANE (Geneset_Overlap_Data Set 1) GO_NCRNA_METABOLIC_PROCESS	false	Geneset_Overlap	GO_PROTEIN_LOCALIZATION_TO_MEMBRANE (Geneset_Overlap_Data Set 1) GO_NCRNA_METABOLIC_PROCESS
RPL12|RPS15A|RPS23|RPLP0|RPLP2|RPL26|RPS17|RPL21|RPS13|RPL19|RPS16|RPL11|RPL13A|RPL6|RPL18|RPS25|RPS12|RPS3A|RPL27|RPS9|RPL7|RPS18|RPL10A|RPL23|RPS29|RPS3|RPS7|RPS5|RPS4X|RPS6|RPL31|RPS11|RPL22|RPS8|RPL15|RPS2|RPSA|RPS19|RPS14	39	0.5619922630560928	GO_PROTEIN_LOCALIZATION_TO_MEMBRANE (Geneset_Overlap_Data Set 1) GO_ORGANONITROGEN_COMPOUND_BIOSYNTHETIC_PROCESS	false	Geneset_Overlap	GO_PROTEIN_LOCALIZATION_TO_MEMBRANE (Geneset_Overlap_Data Set 1) GO_ORGANONITROGEN_COMPOUND_BIOSYNTHETIC_PROCESS
RPL12|RPS15A|RPS23|RPLP0|RPLP2|RPL26|RPS17|RPL21|RPS13|RPL19|RPS16|RPL11|RPL13A|RPL6|RPL18|RPS25|RPS12|RPS3A|RPL27|RPS9|RPL7|RPS18|RPL10A|RPL23|RPS29|RPS3|RPS7|RPS5|RPS4X|RPS6|RPL31|RPS11|RPL22|RPS8|RPL15|RPS2|RPSA|RPS19|RPS14	39	0.8357142857142856	GO_PROTEIN_LOCALIZATION_TO_MEMBRANE (Geneset_Overlap_Data Set 1) GO_MULTI_ORGANISM_METABOLIC_PROCESS	false	Geneset_Overlap	GO_PROTEIN_LOCALIZATION_TO_MEMBRANE (Geneset_Overlap_Data Set 1) GO_MULTI_ORGANISM_METABOLIC_PROCESS
CADPS|NSF|VAMP2|STX1A|ERC1|PFN1|MPST|RAB11B|SYN1|DCLK1|PFN2|SV2A|PPP1CC|MAPT|SYT1|RTN4|MAP1B|CALB1|GAP43|ARF1|SLC1A3|MYH10|VDAC1|PPP1R9B|RAB7A|ARPC2|STXBP1|ATP1A3|VDAC2|ATP2B1|CTNNB1|CANX|GPM6A|SNCA|HSPA8|HNRNPK|ITGB1|MARCKS|STX1B|SNCB	40	0.7045454545454546	GO_NEURON_PART (Geneset_Overlap_Data Set 1) GO_SYNAPSE	false	Geneset_Overlap	GO_NEURON_PART (Geneset_Overlap_Data Set 1) GO_SYNAPSE
NSF|VAMP2|SLC6A1|STX1A|PFN1|MPST|SYN1|GNAQ|PFN2|KHSRP|SV2A|PPP1CC|MAPT|SYT1|DPYSL5|L1CAM|MAP1B|YWHAE|MTPN|UCHL1|NCDN|APOE|SYNCRIP|GDI1|TUBB3|CALB1|DCX|DPYSL3|GAP43|ARF1|SLC1A3|MYH10|HMGB1|PPP1R9B|RAB7A|ARPC2|MYO5A|STXBP1|ATP1A3|OPA1|SOD1|HNRNPA3|ATP2B1|GNB1|CTNNB1|CANX|HSP90AA1|GPM6A|GNAO1|SNCA|ABAT|GOT1|HNRNPK|ITGB1|MARCKS|ALCAM|SNCB|STMN2|RPS6|CLIP2|STMN1|GARS|VIM|DBN1	64	0.9210526315789473	GO_NEURON_PART (Geneset_Overlap_Data Set 1) GO_NEURON_PROJECTION	false	Geneset_Overlap	GO_NEURON_PART (Geneset_Overlap_Data Set 1) GO_NEURON_PROJECTION
CADPS|NSF|VAMP2|STX1A|ERC1|RAB11B|SYN1|DCLK1|PFN2|SV2A|PPP1CC|MAPT|SYT1|RTN4|MAP1B|CALB1|GAP43|ARF1|SLC1A3|MYH10|VDAC1|PPP1R9B|RAB7A|STXBP1|ATP1A3|VDAC2|ATP2B1|CANX|GPM6A|SNCA|HSPA8|HNRNPK|ITGB1|MARCKS|STX1B|SNCB	36	0.7368421052631579	GO_NEURON_PART (Geneset_Overlap_Data Set 1) GO_SYNAPSE_PART	false	Geneset_Overlap	GO_NEURON_PART (Geneset_Overlap_Data Set 1) GO_SYNAPSE_PART
CADPS|VAMP2|SLC6A1|STX1A|SYN1|GNAQ|SYT1|APOE|SLC1A3|VDAC1|MYO5A|STXBP1|GNB1|CTNNB1|SNCA|HSPA8|STX1B|SNCB	18	0.5215909090909091	GO_NEURON_PART (Geneset_Overlap_Data Set 1) GO_SYNAPTIC_SIGNALING	false	Geneset_Overlap	GO_NEURON_PART (Geneset_Overlap_Data Set 1) GO_SYNAPTIC_SIGNALING
RPL19|RPL21|RPLP0|RPS17|RPL26|RPL18|RPS16|RPS7|RPL23|RPSA|RPL15|RPS2|GARS|RPS6|RPS11|RPS5|RPS13|RPLP2|RPS23|RPL12|RPS15A|RPS3A|RPL27|RPS25|RPS12|RPL13A|RPL6|RPL11|RPS3|RPS29|RPS18|RPL7|RPL10A|RPS9|RPS19|RPS14|RPL22|RPS8|RPL31|RPS4X	40	0.7987711213517665	GO_CELLULAR_AMIDE_METABOLIC_PROCESS (Geneset_Overlap_Data Set 1) GO_NCRNA_METABOLIC_PROCESS	false	Geneset_Overlap	GO_CELLULAR_AMIDE_METABOLIC_PROCESS (Geneset_Overlap_Data Set 1) GO_NCRNA_METABOLIC_PROCESS
RPL19|RPL21|RPL18|RPS7|RPL23|EEF1A1|EIF3A|RPS2|RPS6|RPS11|RPS13|RPS23|RPL12|RPS3A|RPS25|RPL13A|RPL11|RPS3|SLC25A3|RPL7|RPL10A|RPS9|RPS19|RPS14	24	0.46769230769230774	GO_CELLULAR_AMIDE_METABOLIC_PROCESS (Geneset_Overlap_Data Set 1) GO_NUCLEOLUS	false	Geneset_Overlap	GO_CELLULAR_AMIDE_METABOLIC_PROCESS (Geneset_Overlap_Data Set 1) GO_NUCLEOLUS
RPL19|RPL21|RPLP0|RPS17|RPL26|RPL18|RPS16|RPS7|RPL23|RPSA|EIF3A|RPL15|RPS2|RPS6|RPS11|RPS5|RPS13|RPLP2|RPS23|RPL12|EIF3C|RPS15A|RPS3A|RPL27|RPS25|RPS12|RPL13A|RPL6|RPL11|RPS3|RPS29|RPS18|RPL7|RPL10A|RPS9|RPS19|RPS14|RPL22|RPS8|RPL31|RPS4X	41	0.7610367892976588	GO_CELLULAR_AMIDE_METABOLIC_PROCESS (Geneset_Overlap_Data Set 1) GO_RIBONUCLEOPROTEIN_COMPLEX_BIOGENESIS	false	Geneset_Overlap	GO_CELLULAR_AMIDE_METABOLIC_PROCESS (Geneset_Overlap_Data Set 1) GO_RIBONUCLEOPROTEIN_COMPLEX_BIOGENESIS
RPL19|RPL21|RPLP0|RPS17|RPL26|RPL18|RPS16|RPS7|RPL23|RPSA|RPL15|RPS2|RPS6|RPS11|RPS5|RPS13|RPLP2|RPS23|RPL12|RPS15A|RPS3A|RPL27|RPS25|RPS12|RPL13A|RPL6|RPL11|RPS3|RPS29|RPS18|RPL7|RPL10A|RPS9|RPS19|RPS14|RPL22|RPS8|RPL31|RPS4X	39	0.6211111111111112	GO_CELLULAR_AMIDE_METABOLIC_PROCESS (Geneset_Overlap_Data Set 1) GO_PROTEIN_LOCALIZATION_TO_ORGANELLE	false	Geneset_Overlap	GO_CELLULAR_AMIDE_METABOLIC_PROCESS (Geneset_Overlap_Data Set 1) GO_PROTEIN_LOCALIZATION_TO_ORGANELLE
RPL19|RPL21|RPLP0|RPS17|RPL26|RPL18|RPS16|RPS7|RPL23|RPSA|EIF3A|RPL15|RPS2|RPS6|RPS11|RPS5|RPS13|RPLP2|RPS23|RPL12|RPS15A|RPS3A|RPL27|RPS25|RPS12|RPL13A|RPL6|RPL11|RPS3|RPS29|RPS18|RPL7|RPL10A|RPS9|RPS19|RPS14|RPL22|RPS8|RPL31|RPS4X	40	0.8333333333333333	GO_CELLULAR_AMIDE_METABOLIC_PROCESS (Geneset_Overlap_Data Set 1) GO_MULTI_ORGANISM_METABOLIC_PROCESS	false	Geneset_Overlap	GO_CELLULAR_AMIDE_METABOLIC_PROCESS (Geneset_Overlap_Data Set 1) GO_MULTI_ORGANISM_METABOLIC_PROCESS
RPL19|RPL21|RPLP0|RPS17|RPL26|RPL18|RPS16|RPS7|RPL23|RPSA|RPL15|RPS2|RPS6|RPS11|RPS5|RPS13|RPLP2|RPS23|RPL12|RPS15A|RPS3A|RPL27|RPS25|RPS12|RPL13A|RPL6|RPL11|RPS3|RPS29|RPS18|RPL7|RPL10A|RPS9|RPS19|RPS14|RPL22|RPS8|RPL31|RPS4X	39	0.825	GO_CELLULAR_AMIDE_METABOLIC_PROCESS (Geneset_Overlap_Data Set 1) GO_ESTABLISHMENT_OF_PROTEIN_LOCALIZATION_TO_ENDOPLASMIC_RETICULUM	false	Geneset_Overlap	GO_CELLULAR_AMIDE_METABOLIC_PROCESS (Geneset_Overlap_Data Set 1) GO_ESTABLISHMENT_OF_PROTEIN_LOCALIZATION_TO_ENDOPLASMIC_RETICULUM
RPL19|RPL21|RPLP0|RPS17|RPL26|PABPC1|RPL18|RPS16|RPS7|RPL23|EEF1A1|TUFM|RPSA|EIF3A|RPL15|RPS2|GARS|RPS6|RPS11|RPS5|RPS13|RPLP2|RPS23|RPL12|EIF3C|SLC25A1|RPS15A|RPS3A|RPL27|RPS25|RPS12|RPL13A|RPL6|GSTA3|RPL11|RPS3|RPS29|EEF2|SLC25A4|SLC25A3|ATPIF1|RPS18|RPL7|RPL10A|GSTP1|EIF5A|RPS9|RPS19|RPS14|RPL22|RPS8|RPL31|RPS4X	53	0.7534313725490196	GO_CELLULAR_AMIDE_METABOLIC_PROCESS (Geneset_Overlap_Data Set 1) GO_ORGANONITROGEN_COMPOUND_BIOSYNTHETIC_PROCESS	false	Geneset_Overlap	GO_CELLULAR_AMIDE_METABOLIC_PROCESS (Geneset_Overlap_Data Set 1) GO_ORGANONITROGEN_COMPOUND_BIOSYNTHETIC_PROCESS
RPL19|RPL21|RPLP0|RPL26|RPL18|RPL23|RPL15|RPLP2|RPL12|RPL27|RPL13A|RPL6|RPL11|RPL7|RPL10A|RPL22|RPL31	17	0.6416666666666666	GO_CELLULAR_AMIDE_METABOLIC_PROCESS (Geneset_Overlap_Data Set 1) GO_LARGE_RIBOSOMAL_SUBUNIT	false	Geneset_Overlap	GO_CELLULAR_AMIDE_METABOLIC_PROCESS (Geneset_Overlap_Data Set 1) GO_LARGE_RIBOSOMAL_SUBUNIT
RPL19|RPL21|RPLP0|RPS17|RPL26|RPL18|RPS16|RPS7|RPL23|RPSA|RPL15|RPS2|RPS6|RPS11|RPS5|RPS13|RPLP2|RPS23|RPL12|SLC25A1|RPS15A|RPS3A|RPL27|RPS12|RPL13A|RPL6|RPL11|RPS3|RPS29|SLC25A4|SLC25A3|RPS18|RPL7|RPL10A|RPS9|RPS19|RPS14|RPL22|RPS8|RPL31|RPS4X	41	0.8416666666666667	GO_CELLULAR_AMIDE_METABOLIC_PROCESS (Geneset_Overlap_Data Set 1) GO_STRUCTURAL_CONSTITUENT_OF_RIBOSOME	false	Geneset_Overlap	GO_CELLULAR_AMIDE_METABOLIC_PROCESS (Geneset_Overlap_Data Set 1) GO_STRUCTURAL_CONSTITUENT_OF_RIBOSOME
RPL19|RPL21|RPLP0|RPS17|RPL26|RPL18|RPS16|RPS7|RPL23|RPSA|RPL15|RPS2|RPS6|RPS11|RPS5|RPS13|RPLP2|RPS23|RPL12|RPS15A|RPS3A|RPL27|RPS25|RPS12|RPL13A|RPL6|RPL11|RPS3|RPS29|RPS18|RPL7|RPL10A|RPS9|RPS19|RPS14|RPL22|RPS8|RPL31|RPS4X	39	0.6111244019138756	GO_CELLULAR_AMIDE_METABOLIC_PROCESS (Geneset_Overlap_Data Set 1) GO_PROTEIN_LOCALIZATION_TO_MEMBRANE	false	Geneset_Overlap	GO_CELLULAR_AMIDE_METABOLIC_PROCESS (Geneset_Overlap_Data Set 1) GO_PROTEIN_LOCALIZATION_TO_MEMBRANE
RPL19|RPL21|RPLP0|RPS17|RPL26|PABPC1|RPL18|RPS16|RPS7|RPL23|RPSA|RPL15|RPS2|RPS6|RPS11|RPS5|RPS13|RPLP2|RPS23|RPL12|RPS15A|RPS3A|RPL27|RPS25|RPS12|RPL13A|RPL6|RPL11|RPS3|RPS29|RPS18|RPL7|RPL10A|RPS9|RPS19|RPS14|RPL22|RPS8|RPL31|RPS4X	40	0.5742971887550201	GO_CELLULAR_AMIDE_METABOLIC_PROCESS (Geneset_Overlap_Data Set 1) GO_MACROMOLECULE_CATABOLIC_PROCESS	false	Geneset_Overlap	GO_CELLULAR_AMIDE_METABOLIC_PROCESS (Geneset_Overlap_Data Set 1) GO_MACROMOLECULE_CATABOLIC_PROCESS
RPL19|RPL21|RPLP0|RPS17|RPL26|PABPC1|RPL18|RPS16|RPS7|RPL23|RPSA|RPL15|RPS2|RPS6|RPS11|RPS5|RPS13|RPLP2|RPS23|RPL12|RPS15A|RPS3A|RPL27|RPS25|RPS12|RPL13A|RPL6|RPL11|RPS3|RPS29|RPS18|RPL7|RPL10A|RPS9|RPS19|RPS14|RPL22|RPS8|RPL31|RPS4X	40	0.8333333333333333	GO_CELLULAR_AMIDE_METABOLIC_PROCESS (Geneset_Overlap_Data Set 1) GO_NUCLEAR_TRANSCRIBED_MRNA_CATABOLIC_PROCESS_NONSENSE_MEDIATED_DECAY	false	Geneset_Overlap	GO_CELLULAR_AMIDE_METABOLIC_PROCESS (Geneset_Overlap_Data Set 1) GO_NUCLEAR_TRANSCRIBED_MRNA_CATABOLIC_PROCESS_NONSENSE_MEDIATED_DECAY
RPL19|RPL21|RPLP0|RPS17|RPL26|RPL18|RPS16|RPS7|RPL23|RPSA|RPL15|RPS2|RPS6|RPS11|RPS5|RPS13|RPLP2|RPS23|RPL12|RPS15A|RPS3A|RPL27|RPS25|RPS12|RPL13A|RPL6|RPL11|RPS3|RPS29|RPS18|RPL7|RPL10A|RPS9|RPS19|RPS14|RPL22|RPS8|RPL31|RPS4X	39	0.6111244019138756	GO_CELLULAR_AMIDE_METABOLIC_PROCESS (Geneset_Overlap_Data Set 1) GO_PROTEIN_TARGETING	false	Geneset_Overlap	GO_CELLULAR_AMIDE_METABOLIC_PROCESS (Geneset_Overlap_Data Set 1) GO_PROTEIN_TARGETING
RPL19|RPL21|RPLP0|RPS17|RPL26|PABPC1|RPL18|RPS16|RPS7|RPL23|EEF1A1|TUFM|RPSA|EIF3A|RPL15|RPS2|GARS|RPS6|RPS11|RPS5|RPS13|RPLP2|RPS23|RPL12|EIF3C|SLC25A1|RPS15A|RPS3A|RPL27|RPS25|RPS12|RPL13A|RPL6|RPL11|RPS3|RPS29|EEF2|SLC25A4|SLC25A3|ATPIF1|RPS18|RPL7|RPL10A|EIF5A|RPS9|RPS19|RPS14|RPL22|RPS8|RPL31|RPS4X	51	0.925	GO_CELLULAR_AMIDE_METABOLIC_PROCESS (Geneset_Overlap_Data Set 1) GO_AMIDE_BIOSYNTHETIC_PROCESS	false	Geneset_Overlap	GO_CELLULAR_AMIDE_METABOLIC_PROCESS (Geneset_Overlap_Data Set 1) GO_AMIDE_BIOSYNTHETIC_PROCESS
RPS9|RPL10A|RPS18|RPL7|RPS29|RPS3|RPS4X|RPL31|RPS8|RPL22|RPS14|RPS19|RPS15A|RPL12|RPS23|RPLP2|RPS13|RPL11|RPL6|RPL13A|RPS12|RPS25|RPL27|RPS3A|RPL23|HNRNPA2B1|RPS7|RPS5|RPS11|RPS6|RPL15|RPS2|RPSA|RPL26|RPS17|RPLP0|RPL21|RPL19|RPS16|RPL18	40	0.8398268398268398	GO_MRNA_METABOLIC_PROCESS (Geneset_Overlap_Data Set 1) GO_NCRNA_METABOLIC_PROCESS	false	Geneset_Overlap	GO_MRNA_METABOLIC_PROCESS (Geneset_Overlap_Data Set 1) GO_NCRNA_METABOLIC_PROCESS
RPS9|RPL10A|RPL7|RPS3|RPS14|RPS19|RPL12|RPS23|RPS13|RPL11|RPL13A|RPS25|RPS3A|HSPA8|RPL23|C1QBP|RPS7|RPS11|RPS6|RPS2|RPL21|RPL19|RPL18	23	0.46153846153846156	GO_MRNA_METABOLIC_PROCESS (Geneset_Overlap_Data Set 1) GO_NUCLEOLUS	false	Geneset_Overlap	GO_MRNA_METABOLIC_PROCESS (Geneset_Overlap_Data Set 1) GO_NUCLEOLUS
RPL7|HNRNPA3|RPS3|HNRNPC|KHSRP|RPS14|RPS13|HNRNPD|RPL13A|HNRNPK|C1QBP|SYNCRIP|HNRNPA2B1|RPS5|ELAVL1|RPS2	16	0.5898989898989899	GO_MRNA_METABOLIC_PROCESS (Geneset_Overlap_Data Set 1) GO_MRNA_BINDING	false	Geneset_Overlap	GO_MRNA_METABOLIC_PROCESS (Geneset_Overlap_Data Set 1) GO_MRNA_BINDING
RPS9|RPL10A|RPS18|RPL7|RPS29|RPS3|RPS4X|RPL31|RPS8|RPL22|RPS14|RPS19|RPS15A|RPL12|RPS23|RPLP2|RPS13|RPL11|RPL6|RPL13A|RPS12|RPS25|RPL27|RPS3A|RPL23|C1QBP|RPS7|RPS5|RPS11|RPS6|RPL15|RPS2|RPSA|RPL26|RPS17|RPLP0|RPL21|RPL19|RPS16|RPL18	40	0.7737656595431097	GO_MRNA_METABOLIC_PROCESS (Geneset_Overlap_Data Set 1) GO_RIBONUCLEOPROTEIN_COMPLEX_BIOGENESIS	false	Geneset_Overlap	GO_MRNA_METABOLIC_PROCESS (Geneset_Overlap_Data Set 1) GO_RIBONUCLEOPROTEIN_COMPLEX_BIOGENESIS
RPS9|RPL10A|RPS18|RPL7|RPS29|RPS3|RPS4X|RPL31|RPS8|RPL22|RPS14|RPS19|RPS15A|RPL12|RPS23|RPLP2|RPS13|RPL11|RPL6|RPL13A|RPS12|RPS25|RPL27|RPS3A|RPL23|RPS7|RPS5|RPS11|RPS6|RPL15|RPS2|RPSA|PABPC1|RPL26|RPS17|RPLP0|RPL21|RPL19|RPS16|RPL18	40	0.8773584905660378	GO_MRNA_METABOLIC_PROCESS (Geneset_Overlap_Data Set 1) GO_NUCLEAR_TRANSCRIBED_MRNA_CATABOLIC_PROCESS_NONSENSE_MEDIATED_DECAY	false	Geneset_Overlap	GO_MRNA_METABOLIC_PROCESS (Geneset_Overlap_Data Set 1) GO_NUCLEAR_TRANSCRIBED_MRNA_CATABOLIC_PROCESS_NONSENSE_MEDIATED_DECAY
RPS9|RPL10A|RPS18|RPL7|RPS29|RPS3|RPS4X|RPL31|RPS8|RPL22|RPS14|RPS19|RPS15A|RPL12|RPS23|RPLP2|RPS13|RPL11|RPL6|RPL13A|RPS12|RPS25|RPL27|RPS3A|HSPA8|RPL23|RPS7|RPS5|RPS11|RPS6|RPL15|RPS2|RPSA|RPL26|RPS17|RPLP0|RPL21|RPL19|RPS16|RPL18	40	0.6714761376248612	GO_MRNA_METABOLIC_PROCESS (Geneset_Overlap_Data Set 1) GO_PROTEIN_TARGETING	false	Geneset_Overlap	GO_MRNA_METABOLIC_PROCESS (Geneset_Overlap_Data Set 1) GO_PROTEIN_TARGETING
RPS9|RPL10A|RPS18|RPL7|RPS29|RPS3|RPS4X|RPL31|RPS8|RPL22|RPS14|RPS19|RPS15A|RPL12|RPS23|RPLP2|RPS13|RPL11|RPL6|RPL13A|RPS12|RPS25|RPL27|RPS3A|RPL23|RPS7|RPS5|RPS11|RPS6|RPL15|RPS2|RPSA|PABPC1|RPL26|RPS17|RPLP0|RPL21|RPL19|RPS16|RPL18	40	0.704656862745098	GO_MRNA_METABOLIC_PROCESS (Geneset_Overlap_Data Set 1) GO_AMIDE_BIOSYNTHETIC_PROCESS	false	Geneset_Overlap	GO_MRNA_METABOLIC_PROCESS (Geneset_Overlap_Data Set 1) GO_AMIDE_BIOSYNTHETIC_PROCESS
RPS9|RPL10A|RPS18|RPL7|RPS29|RPS3|RPS4X|RPL31|RPS8|RPL22|RPS14|RPS19|RPS15A|RPL12|RPS23|RPLP2|RPS13|RPL11|RPL6|RPL13A|RPS12|RPS25|RPL27|RPS3A|RPL23|RPS7|RPS5|RPS11|RPS6|RPL15|RPS2|RPSA|PABPC1|RPL26|RPS17|RPLP0|RPL21|RPL19|RPS16|RPL18	40	0.6513310933057638	GO_MRNA_METABOLIC_PROCESS (Geneset_Overlap_Data Set 1) GO_CELLULAR_AMIDE_METABOLIC_PROCESS	false	Geneset_Overlap	GO_MRNA_METABOLIC_PROCESS (Geneset_Overlap_Data Set 1) GO_CELLULAR_AMIDE_METABOLIC_PROCESS
RPL10A|RPL7|RPL31|RPL22|RPL12|RPLP2|RPL11|RPL6|RPL13A|RPL27|RPL23|RPL15|RPL26|RPLP0|RPL21|RPL19|RPL18	17	0.660377358490566	GO_MRNA_METABOLIC_PROCESS (Geneset_Overlap_Data Set 1) GO_LARGE_RIBOSOMAL_SUBUNIT	false	Geneset_Overlap	GO_MRNA_METABOLIC_PROCESS (Geneset_Overlap_Data Set 1) GO_LARGE_RIBOSOMAL_SUBUNIT
RPS9|RPL10A|RPS18|RPL7|RPS29|RPS3|RPS4X|RPL31|RPS8|RPL22|RPS14|RPS19|RPS15A|RPL12|RPS23|RPLP2|RPS13|RPL11|RPL6|RPL13A|RPS12|RPS25|RPL27|RPS3A|RPL23|RPS7|RPS5|RPS11|RPS6|RPL15|RPS2|RPSA|RPL26|RPS17|RPLP0|RPL21|RPL19|RPS16|RPL18	39	0.6505332239540607	GO_MRNA_METABOLIC_PROCESS (Geneset_Overlap_Data Set 1) GO_PROTEIN_LOCALIZATION_TO_MEMBRANE	false	Geneset_Overlap	GO_MRNA_METABOLIC_PROCESS (Geneset_Overlap_Data Set 1) GO_PROTEIN_LOCALIZATION_TO_MEMBRANE
RPS9|RPL10A|RPS18|RPL7|RPS29|RPS3|RPS4X|RPL31|RPS8|RPL22|RPS14|RPS19|RPS15A|RPL12|RPS23|RPLP2|RPS13|RPL11|RPL6|RPL13A|RPS12|RPL27|RPS3A|RPL23|RPS7|RPS5|RPS11|RPS6|RPL15|RPS2|RPSA|RPL26|RPS17|RPLP0|RPL21|RPL19|RPS16|RPL18	38	0.8027003484320558	GO_MRNA_METABOLIC_PROCESS (Geneset_Overlap_Data Set 1) GO_STRUCTURAL_CONSTITUENT_OF_RIBOSOME	false	Geneset_Overlap	GO_MRNA_METABOLIC_PROCESS (Geneset_Overlap_Data Set 1) GO_STRUCTURAL_CONSTITUENT_OF_RIBOSOME
RPS9|RPL10A|RPS18|RPL7|RPS29|RPS3|RPS4X|RPL31|RPS8|RPL22|RPS14|RPS19|RPS15A|RPL12|RPS23|RPLP2|RPS13|RPL11|RPL6|RPL13A|RPS12|RPS25|RPL27|RPS3A|RPL23|RPS7|RPS5|RPS11|RPS6|RPL15|RPS2|RPSA|RPL26|RPS17|RPLP0|RPL21|RPL19|RPS16|RPL18	39	0.8486111111111111	GO_MRNA_METABOLIC_PROCESS (Geneset_Overlap_Data Set 1) GO_MULTI_ORGANISM_METABOLIC_PROCESS	false	Geneset_Overlap	GO_MRNA_METABOLIC_PROCESS (Geneset_Overlap_Data Set 1) GO_MULTI_ORGANISM_METABOLIC_PROCESS
RPS9|RPL10A|RPS18|RPL7|RPS29|RPS3|RPS4X|RPL31|RPS8|RPL22|RPS14|RPS19|RPS15A|RPL12|RPS23|RPLP2|RPS13|RPL11|RPL6|RPL13A|RPS12|RPS25|RPL27|RPS3A|RPL23|RPS7|RPS5|RPS11|RPS6|RPL15|RPS2|RPSA|RPL26|RPS17|RPLP0|RPL21|RPL19|RPS16|RPL18	39	0.8301552106430155	GO_MRNA_METABOLIC_PROCESS (Geneset_Overlap_Data Set 1) GO_PROTEIN_TARGETING_TO_MEMBRANE	false	Geneset_Overlap	GO_MRNA_METABOLIC_PROCESS (Geneset_Overlap_Data Set 1) GO_PROTEIN_TARGETING_TO_MEMBRANE
RPS9|RPL10A|RPS18|RPL7|RPS29|RPS3|RPS4X|RPL31|RPS8|RPL22|RPS14|RPS19|RPS15A|RPL12|RPS23|RPLP2|RPS13|RPL11|RPL6|RPL13A|RPS12|RPS25|RPL27|RPS3A|RPL23|RPS7|RPS5|RPS11|RPS6|RPL15|RPS2|RPSA|RPL26|RPS17|RPLP0|RPL21|RPL19|RPS16|RPL18	39	0.8679245283018868	GO_MRNA_METABOLIC_PROCESS (Geneset_Overlap_Data Set 1) GO_ESTABLISHMENT_OF_PROTEIN_LOCALIZATION_TO_ENDOPLASMIC_RETICULUM	false	Geneset_Overlap	GO_MRNA_METABOLIC_PROCESS (Geneset_Overlap_Data Set 1) GO_ESTABLISHMENT_OF_PROTEIN_LOCALIZATION_TO_ENDOPLASMIC_RETICULUM
RPS9|RPL10A|RPS18|RPL7|RPS29|RPS3|RPS4X|RPL31|RPS8|RPL22|RPS14|RPS19|RPS15A|RPL12|RPS23|RPLP2|RPS13|RPL11|RPL6|RPL13A|RPS12|RPS25|RPL27|RPS3A|RPL23|RPS7|RPS5|RPS11|RPS6|RPL15|RPS2|RPSA|PABPC1|RPL26|RPS17|RPLP0|RPL21|RPL19|RPS16|RPL18	40	0.5971387103462575	GO_MRNA_METABOLIC_PROCESS (Geneset_Overlap_Data Set 1) GO_ORGANONITROGEN_COMPOUND_BIOSYNTHETIC_PROCESS	false	Geneset_Overlap	GO_MRNA_METABOLIC_PROCESS (Geneset_Overlap_Data Set 1) GO_ORGANONITROGEN_COMPOUND_BIOSYNTHETIC_PROCESS
RPS9|RPL10A|RPS18|RPL7|RPS29|RPS3|RPS4X|RPL31|RPS8|RPL22|KHSRP|RPS14|RPS19|RPS15A|RPL12|RPS23|RPLP2|RPS13|HNRNPD|RPL11|RPL6|RPL13A|RPS12|RPS25|RPL27|RPS3A|RPL23|RPS7|RPS5|RPS11|RPS6|RPL15|RPS2|RPSA|PABPC1|RPL26|RPS17|RPLP0|RPL21|RPL19|RPS16|RPL18	42	0.6800101988781234	GO_MRNA_METABOLIC_PROCESS (Geneset_Overlap_Data Set 1) GO_MACROMOLECULE_CATABOLIC_PROCESS	false	Geneset_Overlap	GO_MRNA_METABOLIC_PROCESS (Geneset_Overlap_Data Set 1) GO_MACROMOLECULE_CATABOLIC_PROCESS
RPS9|RPL10A|RPS18|RPL7|HNRNPA3|RPS29|RPS3|RPS4X|HNRNPC|RPL31|RPS8|RPL22|KHSRP|RPS14|RPS19|RPS15A|RPL12|RPS23|RPLP2|RPS13|HNRNPD|RPL11|RPL6|RPL13A|RPS12|RPS25|RPL27|RPS3A|HNRNPK|HSPA8|RPL23|C1QBP|SYNCRIP|HNRNPA2B1|RPS7|HNRNPF|RPS5|ELAVL1|RPS11|RPS6|RPL15|RPS2|HNRNPL|RPSA|PABPC1|HNRNPA1|RPL26|RPS17|RPLP0|RPL21|RPL19|RPS16|RPL18	53	0.9818181818181818	GO_MRNA_METABOLIC_PROCESS (Geneset_Overlap_Data Set 1) GO_RNA_PROCESSING	false	Geneset_Overlap	GO_MRNA_METABOLIC_PROCESS (Geneset_Overlap_Data Set 1) GO_RNA_PROCESSING
RPS23|RPL10A|RPS18|RPL7|RPS9|ANXA2|RPS15A|RPL12|RPS29|RPS7|RPS3|RPS13|RPL21|RPL19|RPL26|RPS17|RPL23|RPLP0|RPLP2|RPL18|RPS11|RPL31|RPL6|RPL13A|RPS6|RPS4X|RPL11|RPS16|RPS5|RPL27|RPS14|RPS19|RPSA|RPS3A|SSR1|RPS8|RPS12|RPS2|RPL15|RPL22|RPS25	41	0.8727272727272728	GO_PROTEIN_TARGETING_TO_MEMBRANE (Geneset_Overlap_Data Set 1) GO_PROTEIN_TARGETING	false	Geneset_Overlap	GO_PROTEIN_TARGETING_TO_MEMBRANE (Geneset_Overlap_Data Set 1) GO_PROTEIN_TARGETING
RPS23|RPL10A|RPS18|RPL7|RPS9|RPS15A|RPL12|RPS29|RPS7|RPS3|RPS13|RPL21|RPL19|RPL26|RPS17|RPL23|RPLP0|RPLP2|RPL18|RPS11|RPL31|RPL6|RPL13A|RPS6|RPS4X|RPL11|RPS16|RPS5|RPL27|RPS14|RPS19|RPSA|RPS3A|RPS8|RPS12|RPS2|RPL15|RPL22|RPS25	39	0.719359756097561	GO_PROTEIN_TARGETING_TO_MEMBRANE (Geneset_Overlap_Data Set 1) GO_ORGANONITROGEN_COMPOUND_BIOSYNTHETIC_PROCESS	false	Geneset_Overlap	GO_PROTEIN_TARGETING_TO_MEMBRANE (Geneset_Overlap_Data Set 1) GO_ORGANONITROGEN_COMPOUND_BIOSYNTHETIC_PROCESS
RPS23|RPL10A|RPS18|RPL7|RPS9|RPS15A|RPL12|RPS29|RPS7|RPS3|RPS13|RPL21|RPL19|RPL26|RPS17|RPL23|RPLP0|RPLP2|RPL18|RPS11|RPL31|RPL6|RPL13A|RPS6|RPS4X|RPL11|RPS16|RPS5|RPL27|RPS14|RPS19|RPSA|RPS3A|RPS8|RPS12|RPS2|RPL15|RPL22|RPS25	39	0.9517857142857142	GO_PROTEIN_TARGETING_TO_MEMBRANE (Geneset_Overlap_Data Set 1) GO_MULTI_ORGANISM_METABOLIC_PROCESS	false	Geneset_Overlap	GO_PROTEIN_TARGETING_TO_MEMBRANE (Geneset_Overlap_Data Set 1) GO_MULTI_ORGANISM_METABOLIC_PROCESS
RPS23|RPL10A|RPS18|RPL7|RPS9|RPS15A|RPL12|RPS29|RPS7|RPS3|RPS13|RPL21|RPL19|RPL26|RPS17|RPL23|RPLP0|RPLP2|RPL18|RPS11|RPL31|RPL6|RPL13A|RPS6|RPS4X|RPL11|RPS16|RPS5|RPL27|RPS14|RPS19|RPSA|RPS3A|RPS8|RPS12|RPS2|RPL15|RPL22|RPS25	39	0.8177150192554556	GO_PROTEIN_TARGETING_TO_MEMBRANE (Geneset_Overlap_Data Set 1) GO_RNA_PROCESSING	false	Geneset_Overlap	GO_PROTEIN_TARGETING_TO_MEMBRANE (Geneset_Overlap_Data Set 1) GO_RNA_PROCESSING
RPS23|RPL10A|RPS18|RPL7|RPS9|RPS15A|RPL12|RPS29|RPS7|RPS3|RPS13|RPL21|RPL19|RPL26|RPS17|RPL23|RPLP0|RPLP2|RPL18|RPS11|RPL31|RPL6|RPL13A|RPS6|RPS4X|RPL11|RPS16|RPS5|RPL27|RPS14|RPS19|RPSA|RPS3A|RPS8|RPS12|RPS2|RPL15|RPL22|RPS25	39	0.775609756097561	GO_PROTEIN_TARGETING_TO_MEMBRANE (Geneset_Overlap_Data Set 1) GO_MACROMOLECULE_CATABOLIC_PROCESS	false	Geneset_Overlap	GO_PROTEIN_TARGETING_TO_MEMBRANE (Geneset_Overlap_Data Set 1) GO_MACROMOLECULE_CATABOLIC_PROCESS
RPS23|RPL10A|RPS18|RPL7|RPS9|RPS15A|RPL12|RPS29|RPS7|RPS3|RPS13|RPL21|RPL19|RPL26|RPS17|RPL23|RPLP0|RPLP2|RPL18|RPS11|RPL31|RPL6|RPL13A|RPS6|RPS4X|RPL11|RPS16|RPS5|RPL27|RPS14|RPS19|RPSA|RPS3A|RPS8|RPS12|RPS2|RPL15|RPL22|RPS25	39	0.975609756097561	GO_PROTEIN_TARGETING_TO_MEMBRANE (Geneset_Overlap_Data Set 1) GO_ESTABLISHMENT_OF_PROTEIN_LOCALIZATION_TO_ENDOPLASMIC_RETICULUM	false	Geneset_Overlap	GO_PROTEIN_TARGETING_TO_MEMBRANE (Geneset_Overlap_Data Set 1) GO_ESTABLISHMENT_OF_PROTEIN_LOCALIZATION_TO_ENDOPLASMIC_RETICULUM
RPS23|RPL10A|RPS18|RPL7|RPS9|RPS15A|RPL12|RPS29|RPS7|RPS3|RPS13|RPL21|RPL19|RPL26|RPS17|RPL23|RPLP0|RPLP2|RPL18|RPS11|RPL31|RPL6|RPL13A|RPS6|RPS4X|RPL11|RPS16|RPS5|RPL27|RPS14|RPS19|RPSA|RPS3A|RPS8|RPS12|RPS2|RPL15|RPL22|RPS25	39	0.8435342843994478	GO_PROTEIN_TARGETING_TO_MEMBRANE (Geneset_Overlap_Data Set 1) GO_AMIDE_BIOSYNTHETIC_PROCESS	false	Geneset_Overlap	GO_PROTEIN_TARGETING_TO_MEMBRANE (Geneset_Overlap_Data Set 1) GO_AMIDE_BIOSYNTHETIC_PROCESS
RPS23|RPL10A|RPS18|RPL7|RPS9|RPS15A|RPL12|RPS29|RPS7|RPS3|RPS13|RPL21|RPL19|RPL26|RPS17|RPL23|RPLP0|RPLP2|RPL18|RPS11|RPL31|RPL6|RPL13A|RPS6|RPS4X|RPL11|RPS16|RPS5|RPL27|RPS14|RPS19|RPSA|RPS3A|RPS8|RPS12|RPS2|RPL15|RPL22|RPS25	39	0.8238240418118467	GO_PROTEIN_TARGETING_TO_MEMBRANE (Geneset_Overlap_Data Set 1) GO_PROTEIN_LOCALIZATION_TO_ORGANELLE	false	Geneset_Overlap	GO_PROTEIN_TARGETING_TO_MEMBRANE (Geneset_Overlap_Data Set 1) GO_PROTEIN_LOCALIZATION_TO_ORGANELLE
RPS23|RPL10A|RPS18|RPL7|RPS9|RPS15A|RPL12|RPS29|RPS7|RPS3|RPS13|RPL21|RPL19|RPL26|RPS17|RPL23|RPLP0|RPLP2|RPL18|RPS11|RPL31|RPL6|RPL13A|RPS6|RPS4X|RPL11|RPS16|RPS5|RPL27|RPS14|RPS19|RPSA|RPS3A|RPS8|RPS12|RPS2|RPL15|RPL22|RPS25	39	0.9517857142857142	GO_PROTEIN_TARGETING_TO_MEMBRANE (Geneset_Overlap_Data Set 1) GO_NUCLEAR_TRANSCRIBED_MRNA_CATABOLIC_PROCESS_NONSENSE_MEDIATED_DECAY	false	Geneset_Overlap	GO_PROTEIN_TARGETING_TO_MEMBRANE (Geneset_Overlap_Data Set 1) GO_NUCLEAR_TRANSCRIBED_MRNA_CATABOLIC_PROCESS_NONSENSE_MEDIATED_DECAY
RPS23|RPL10A|RPS18|RPL7|RPS9|ANXA2|RPS15A|RPL12|RPS29|RPS7|RPS3|RPS13|RPL21|RPL19|RPL26|RPS17|RPL23|RPLP0|RPLP2|RPL18|RPS11|RPL31|RPL6|RPL13A|RPS6|RPS4X|RPL11|RPS16|RPS5|RPL27|RPS14|RPS19|RPSA|RPS3A|SSR1|RPS8|RPS12|RPS2|RPL15|RPL22|RPS25	41	0.8727272727272728	GO_PROTEIN_TARGETING_TO_MEMBRANE (Geneset_Overlap_Data Set 1) GO_PROTEIN_LOCALIZATION_TO_MEMBRANE	false	Geneset_Overlap	GO_PROTEIN_TARGETING_TO_MEMBRANE (Geneset_Overlap_Data Set 1) GO_PROTEIN_LOCALIZATION_TO_MEMBRANE
RPS23|RPL10A|RPS18|RPL7|RPS9|RPS15A|RPL12|RPS29|RPS7|RPS3|RPS13|RPL21|RPL19|RPL26|RPS17|RPL23|RPLP0|RPLP2|RPL18|RPS11|RPL31|RPL6|RPL13A|RPS6|RPS4X|RPL11|RPS16|RPS5|RPL27|RPS14|RPS19|RPSA|RPS3A|RPS8|RPS12|RPS2|RPL15|RPL22|RPS25	39	0.9187915742793791	GO_PROTEIN_TARGETING_TO_MEMBRANE (Geneset_Overlap_Data Set 1) GO_NCRNA_METABOLIC_PROCESS	false	Geneset_Overlap	GO_PROTEIN_TARGETING_TO_MEMBRANE (Geneset_Overlap_Data Set 1) GO_NCRNA_METABOLIC_PROCESS
RPS23|RPL10A|RPS18|RPL7|RPS9|RPS15A|RPL12|RPS29|RPS7|RPS3|RPS13|RPL21|RPL19|RPL26|RPS17|RPL23|RPLP0|RPLP2|RPL18|RPS11|RPL31|RPL6|RPL13A|RPS6|RPS4X|RPL11|RPS16|RPS5|RPL27|RPS14|RPS19|RPSA|RPS3A|RPS8|RPS12|RPS2|RPL15|RPL22|RPS25	39	0.790125885129819	GO_PROTEIN_TARGETING_TO_MEMBRANE (Geneset_Overlap_Data Set 1) GO_CELLULAR_AMIDE_METABOLIC_PROCESS	false	Geneset_Overlap	GO_PROTEIN_TARGETING_TO_MEMBRANE (Geneset_Overlap_Data Set 1) GO_CELLULAR_AMIDE_METABOLIC_PROCESS
RPL10A|RPL7|RPL12|RPL21|RPL19|RPL26|RPL23|RPLP0|RPLP2|RPL18|RPL31|RPL6|RPL13A|RPL11|RPL27|RPL15|RPL22	17	0.7073170731707317	GO_PROTEIN_TARGETING_TO_MEMBRANE (Geneset_Overlap_Data Set 1) GO_LARGE_RIBOSOMAL_SUBUNIT	false	Geneset_Overlap	GO_PROTEIN_TARGETING_TO_MEMBRANE (Geneset_Overlap_Data Set 1) GO_LARGE_RIBOSOMAL_SUBUNIT
RPS23|RPL10A|RPL7|RPS9|RPL12|RPS7|RPS3|RPS13|RPL21|RPL19|RPL23|RPL18|RPS11|RPL13A|RPS6|RPL11|RPS14|RPS19|RPS3A|RPS2|RPS25	21	0.4471968709256845	GO_PROTEIN_TARGETING_TO_MEMBRANE (Geneset_Overlap_Data Set 1) GO_NUCLEOLUS	false	Geneset_Overlap	GO_PROTEIN_TARGETING_TO_MEMBRANE (Geneset_Overlap_Data Set 1) GO_NUCLEOLUS
RPS23|RPL10A|RPS18|RPL7|RPS9|RPS15A|RPL12|RPS29|RPS7|RPS3|RPS13|RPL21|RPL19|RPL26|RPS17|RPL23|RPLP0|RPLP2|RPL18|RPS11|RPL31|RPL6|RPL13A|RPS6|RPS4X|RPL11|RPS16|RPS5|RPL27|RPS14|RPS19|RPSA|RPS3A|RPS8|RPS12|RPS2|RPL15|RPL22	38	0.8952328159645233	GO_PROTEIN_TARGETING_TO_MEMBRANE (Geneset_Overlap_Data Set 1) GO_STRUCTURAL_CONSTITUENT_OF_RIBOSOME	false	Geneset_Overlap	GO_PROTEIN_TARGETING_TO_MEMBRANE (Geneset_Overlap_Data Set 1) GO_STRUCTURAL_CONSTITUENT_OF_RIBOSOME
RPS23|RPL10A|RPS18|RPL7|RPS9|RPS15A|RPL12|RPS29|RPS7|RPS3|RPS13|RPL21|RPL19|RPL26|RPS17|RPL23|RPLP0|RPLP2|RPL18|RPS11|RPL31|RPL6|RPL13A|RPS6|RPS4X|RPL11|RPS16|RPS5|RPL27|RPS14|RPS19|RPSA|RPS3A|RPS8|RPS12|RPS2|RPL15|RPL22|RPS25	39	0.881859756097561	GO_PROTEIN_TARGETING_TO_MEMBRANE (Geneset_Overlap_Data Set 1) GO_RIBONUCLEOPROTEIN_COMPLEX_BIOGENESIS	false	Geneset_Overlap	GO_PROTEIN_TARGETING_TO_MEMBRANE (Geneset_Overlap_Data Set 1) GO_RIBONUCLEOPROTEIN_COMPLEX_BIOGENESIS
RPS13|RPL21|RPL19|RPLP0|RPLP2|RPL26|RPS17|RPS23|RPL12|RPS15A|RPS3A|RPL27|RPS12|RPL13A|RPL6|RPL18|RPS16|RPL11|RPS29|RPS3|RPS7|RPL23|RPL10A|RPS18|RPL7|RPS9|RPS19|RPSA|RPS14|RPL22|RPS8|RPS2|RPL15|RPL31|RPS11|RPS6|RPS5|RPS4X	38	0.7910008410428933	GO_PROTEIN_TARGETING (Geneset_Overlap_Data Set 1) GO_STRUCTURAL_CONSTITUENT_OF_RIBOSOME	false	Geneset_Overlap	GO_PROTEIN_TARGETING (Geneset_Overlap_Data Set 1) GO_STRUCTURAL_CONSTITUENT_OF_RIBOSOME
RPS13|RPL21|RPL19|RPLP0|RPLP2|RPL26|RPS17|RPS23|RPL12|RPS15A|RPS3A|RPL27|RPS25|RPS12|RPL13A|RPL6|RPL18|RPS16|RPL11|RPS29|RPS3|RPS7|RPL23|RPL10A|RPS18|RPL7|RPS9|RPS19|RPSA|RPS14|RPL22|RPS8|RPS2|RPL15|RPL31|RPS11|RPS6|RPS5|RPS4X	39	0.5619922630560928	GO_PROTEIN_TARGETING (Geneset_Overlap_Data Set 1) GO_ORGANONITROGEN_COMPOUND_BIOSYNTHETIC_PROCESS	false	Geneset_Overlap	GO_PROTEIN_TARGETING (Geneset_Overlap_Data Set 1) GO_ORGANONITROGEN_COMPOUND_BIOSYNTHETIC_PROCESS
RPS13|RPL21|RPL19|RPLP0|RPLP2|RPL26|RPS17|RPS23|RPL12|RPS15A|RPS3A|RPL27|RPS25|RPS12|RPL13A|RPL6|RPL18|RPS16|RPL11|RPS29|RPS3|RPS7|RPL23|RPL10A|RPS18|RPL7|RPS9|RPS19|RPSA|RPS14|RPL22|RPS8|RPS2|RPL15|RPL31|RPS11|RPS6|RPS5|RPS4X	39	0.8004926108374384	GO_PROTEIN_TARGETING (Geneset_Overlap_Data Set 1) GO_NCRNA_METABOLIC_PROCESS	false	Geneset_Overlap	GO_PROTEIN_TARGETING (Geneset_Overlap_Data Set 1) GO_NCRNA_METABOLIC_PROCESS
RPL21|RPL19|RPLP0|RPLP2|RPL26|RPL12|RPL27|RPL13A|RPL6|RPL18|RPL11|RPL23|RPL10A|RPL7|RPL22|RPL15|RPL31	17	0.6545454545454545	GO_PROTEIN_TARGETING (Geneset_Overlap_Data Set 1) GO_LARGE_RIBOSOMAL_SUBUNIT	false	Geneset_Overlap	GO_PROTEIN_TARGETING (Geneset_Overlap_Data Set 1) GO_LARGE_RIBOSOMAL_SUBUNIT
RPS13|RPL21|RPL19|RPLP0|RPLP2|RPL26|RPS17|RPS23|RPL12|RPS15A|CTNNB1|RPS3A|RPL27|RPS25|RPS12|RPL13A|RPL6|RPL18|KPNB1|RPS16|RAB7A|RPL11|RPS29|RPS3|RPS7|RPL23|RPL10A|RPS18|RPL7|RPS9|RPS19|RPSA|RPS14|RPL22|RPS8|RPS2|RPL15|RPL31|RPS11|RPS6|RPS5|RPS4X	42	0.6581339712918661	GO_PROTEIN_TARGETING (Geneset_Overlap_Data Set 1) GO_MACROMOLECULE_CATABOLIC_PROCESS	false	Geneset_Overlap	GO_PROTEIN_TARGETING (Geneset_Overlap_Data Set 1) GO_MACROMOLECULE_CATABOLIC_PROCESS
RPS13|RPL21|RPL19|RPLP0|RPLP2|RPL26|RPS17|RPS23|RPL12|RPS15A|RPS3A|RPL27|RPS25|RPS12|RPL13A|RPL6|RPL18|RPS16|RPL11|RPS29|RPS3|RPS7|RPL23|RPL10A|RPS18|RPL7|RPS9|RPS19|RPSA|RPS14|RPL22|RPS8|RPS2|RPL15|RPL31|RPS11|RPS6|RPS5|RPS4X	39	0.8545454545454545	GO_PROTEIN_TARGETING (Geneset_Overlap_Data Set 1) GO_ESTABLISHMENT_OF_PROTEIN_LOCALIZATION_TO_ENDOPLASMIC_RETICULUM	false	Geneset_Overlap	GO_PROTEIN_TARGETING (Geneset_Overlap_Data Set 1) GO_ESTABLISHMENT_OF_PROTEIN_LOCALIZATION_TO_ENDOPLASMIC_RETICULUM
RPS13|RPL21|RPL19|RPLP0|RPLP2|RPL26|RPS17|RAN|RPS23|RPL12|RPS15A|RPS3A|RPL27|RPS25|RPS12|RPL13A|RPL6|RPL18|RPS16|RPL11|RPS29|RPS3|RPS7|RPL23|RPL10A|RPS18|RPL7|RPS9|RPS19|RPSA|RPS14|RPL22|RPS8|RPS2|RPL15|RPL31|RPS11|RPS6|RPS5|RPS4X	40	0.7626514611546685	GO_PROTEIN_TARGETING (Geneset_Overlap_Data Set 1) GO_RIBONUCLEOPROTEIN_COMPLEX_BIOGENESIS	false	Geneset_Overlap	GO_PROTEIN_TARGETING (Geneset_Overlap_Data Set 1) GO_RIBONUCLEOPROTEIN_COMPLEX_BIOGENESIS
CCT5|RPL23|RPL21|RPS13|RPL19|RPS7|RPS3|RPL12|RPS9|RPL7|RPS23|RPL10A|RPS25|RPS2|RPS3A|RPS19|RPS14|RPL11|RPS6|RPL13A|RPS11|RPL18	22	0.44381598793363497	GO_CYTOSOLIC_PART (Geneset_Overlap_Data Set 1) GO_NUCLEOLUS	false	Geneset_Overlap	GO_CYTOSOLIC_PART (Geneset_Overlap_Data Set 1) GO_NUCLEOLUS
RPLP0|RPLP2|RPL23|RPL26|RPS17|RPL21|RPS13|RPL19|RPS29|RPS7|RPS3|RPL12|RPS15A|RPS9|RPL7|RPS18|RPS23|RPL10A|RPS25|RPL22|RPS8|RPS2|RPS12|RPL15|RPS3A|RPSA|RPS19|RPS14|RPL27|RPS16|RPS5|RPS4X|RPL11|RPS6|RPL6|RPL13A|RPS11|RPL31|RPL18	39	0.8253968253968254	GO_CYTOSOLIC_PART (Geneset_Overlap_Data Set 1) GO_NCRNA_METABOLIC_PROCESS	false	Geneset_Overlap	GO_CYTOSOLIC_PART (Geneset_Overlap_Data Set 1) GO_NCRNA_METABOLIC_PROCESS
RPLP0|RPLP2|RPL23|RPL26|RPS17|RPL21|RPS13|RPL19|RPS29|RPS7|RPS3|RPL12|RPS15A|RPS9|RPL7|RPS18|RPS23|RPL10A|RPS25|RPL22|RPS8|RPS2|RPS12|RPL15|RPS3A|RPSA|RPS19|RPS14|RPL27|RPS16|RPS5|RPS4X|RPL11|RPS6|RPL6|RPL13A|RPS11|RPL31|RPL18	39	0.760119940029985	GO_CYTOSOLIC_PART (Geneset_Overlap_Data Set 1) GO_RIBONUCLEOPROTEIN_COMPLEX_BIOGENESIS	false	Geneset_Overlap	GO_CYTOSOLIC_PART (Geneset_Overlap_Data Set 1) GO_RIBONUCLEOPROTEIN_COMPLEX_BIOGENESIS
RPLP0|RPLP2|RPL23|RPL26|RPS17|RPL21|RPS13|RPL19|RPS29|RPS7|RPS3|RPL12|RPS15A|RPS9|RPL7|RPS18|RPS23|RPL10A|RPS25|RPL22|RPS8|RPS2|RPS12|RPL15|RPS3A|RPSA|RPS19|RPS14|RPL27|RPS16|RPS5|RPS4X|RPL11|RPS6|RPL6|RPL13A|RPS11|RPL31|RPL18	39	0.8435342843994478	GO_CYTOSOLIC_PART (Geneset_Overlap_Data Set 1) GO_PROTEIN_TARGETING_TO_MEMBRANE	false	Geneset_Overlap	GO_CYTOSOLIC_PART (Geneset_Overlap_Data Set 1) GO_PROTEIN_TARGETING_TO_MEMBRANE
RPLP0|RPLP2|RPL23|RPL26|RPS17|RPL21|RPS13|RPL19|RPS29|RPS7|RPS3|RPL12|RPS15A|RPS9|RPL7|RPS18|RPS23|RPL10A|RPS25|RPL22|RPS8|RPS2|RPS12|RPL15|RPS3A|RPSA|RPS19|RPS14|RPL27|RPS16|RPS5|RPS4X|RPL11|RPS6|RPL6|RPL13A|RPS11|RPL31|RPL18	39	0.8823529411764706	GO_CYTOSOLIC_PART (Geneset_Overlap_Data Set 1) GO_ESTABLISHMENT_OF_PROTEIN_LOCALIZATION_TO_ENDOPLASMIC_RETICULUM	false	Geneset_Overlap	GO_CYTOSOLIC_PART (Geneset_Overlap_Data Set 1) GO_ESTABLISHMENT_OF_PROTEIN_LOCALIZATION_TO_ENDOPLASMIC_RETICULUM
RPLP0|RPLP2|RPL23|RPL26|RPS17|RPL21|RPS13|RPL19|RPS29|RPS7|RPS3|RPL12|RPS15A|RPS9|RPL7|RPS18|RPS23|RPL10A|RPS25|RPL22|RPS8|RPS2|RPS12|RPL15|RPS3A|RPSA|RPS19|RPS14|RPL27|RPS16|RPS5|PSMD2|RPS4X|RPL11|RPS6|RPL6|RPL13A|RPS11|RPL31|RPL18	40	0.6624271330153684	GO_CYTOSOLIC_PART (Geneset_Overlap_Data Set 1) GO_MACROMOLECULE_CATABOLIC_PROCESS	false	Geneset_Overlap	GO_CYTOSOLIC_PART (Geneset_Overlap_Data Set 1) GO_MACROMOLECULE_CATABOLIC_PROCESS
RPLP0|RPLP2|RPL23|RPL26|RPS17|RPL21|RPS13|RPL19|RPS29|RPS7|RPS3|RPL12|RPS15A|RPS9|RPL7|RPS18|RPS23|RPL10A|RPS25|RPL22|RPS8|RPS2|RPS12|RPL15|RPS3A|RPSA|RPS19|RPS14|RPL27|RPS16|RPS5|RPS4X|RPL11|RPS6|RPL6|RPL13A|RPS11|RPL31|RPL18	39	0.5990196078431372	GO_CYTOSOLIC_PART (Geneset_Overlap_Data Set 1) GO_ORGANONITROGEN_COMPOUND_BIOSYNTHETIC_PROCESS	false	Geneset_Overlap	GO_CYTOSOLIC_PART (Geneset_Overlap_Data Set 1) GO_ORGANONITROGEN_COMPOUND_BIOSYNTHETIC_PROCESS
RPLP0|RPLP2|RPL23|RPL26|RPS17|RPL21|RPS13|RPL19|RPS29|RPS7|RPS3|RPL12|RPS15A|RPS9|RPL7|RPS18|RPS23|RPL10A|RPS25|RPL22|RPS8|RPS2|RPS12|RPL15|RPS3A|RPSA|RPS19|RPS14|RPL27|RPS16|RPS5|RPS4X|RPL11|RPS6|RPL6|RPL13A|RPS11|RPL31|RPL18	39	0.8625	GO_CYTOSOLIC_PART (Geneset_Overlap_Data Set 1) GO_MULTI_ORGANISM_METABOLIC_PROCESS	false	Geneset_Overlap	GO_CYTOSOLIC_PART (Geneset_Overlap_Data Set 1) GO_MULTI_ORGANISM_METABOLIC_PROCESS
RPLP0|RPLP2|RPL23|RPL26|RPL21|RPL19|RPL12|RPL7|RPL10A|RPL22|RPL15|RPL27|RPL11|RPL6|RPL13A|RPL31|RPL18	17	0.6666666666666666	GO_CYTOSOLIC_PART (Geneset_Overlap_Data Set 1) GO_LARGE_RIBOSOMAL_SUBUNIT	false	Geneset_Overlap	GO_CYTOSOLIC_PART (Geneset_Overlap_Data Set 1) GO_LARGE_RIBOSOMAL_SUBUNIT
RPLP0|RPLP2|RPL23|RPL26|RPS17|RPL21|RPS13|RPL19|RPS29|RPS7|RPS3|RPL12|RPS15A|RPS9|RPL7|RPS18|RPS23|RPL10A|RPS25|RPL22|RPS8|RPS2|RPS12|RPL15|RPS3A|RPSA|RPS19|RPS14|RPL27|RPS16|RPS5|RPS4X|RPL11|RPS6|RPL6|RPL13A|RPS11|RPL31|RPL18	39	0.6823529411764706	GO_CYTOSOLIC_PART (Geneset_Overlap_Data Set 1) GO_MRNA_METABOLIC_PROCESS	false	Geneset_Overlap	GO_CYTOSOLIC_PART (Geneset_Overlap_Data Set 1) GO_MRNA_METABOLIC_PROCESS
RPLP0|RPLP2|RPL23|RPL26|RPS17|RPL21|RPS13|RPL19|RPS29|RPS7|RPS3|RPL12|RPS15A|RPS9|RPL7|RPS18|RPS23|RPL10A|RPS25|RPL22|RPS8|RPS2|RPS12|RPL15|RPS3A|RPSA|RPS19|RPS14|RPL27|RPS16|RPS5|RPS4X|RPL11|RPS6|RPL6|RPL13A|RPS11|RPL31|RPL18	39	0.6733977172958736	GO_CYTOSOLIC_PART (Geneset_Overlap_Data Set 1) GO_PROTEIN_LOCALIZATION_TO_MEMBRANE	false	Geneset_Overlap	GO_CYTOSOLIC_PART (Geneset_Overlap_Data Set 1) GO_PROTEIN_LOCALIZATION_TO_MEMBRANE
RPLP0|RPLP2|RPL23|RPL26|RPS17|RPL21|RPS13|RPL19|RPS29|RPS7|RPS3|RPL12|RPS15A|RPS9|RPL7|RPS18|RPS23|RPL10A|RPS25|RPL22|RPS8|RPS2|RPS12|RPL15|RPS3A|RPSA|RPS19|RPS14|RPL27|RPS16|RPS5|RPS4X|RPL11|RPS6|RPL6|RPL13A|RPS11|RPL31|RPL18	39	0.6531862745098038	GO_CYTOSOLIC_PART (Geneset_Overlap_Data Set 1) GO_CELLULAR_AMIDE_METABOLIC_PROCESS	false	Geneset_Overlap	GO_CYTOSOLIC_PART (Geneset_Overlap_Data Set 1) GO_CELLULAR_AMIDE_METABOLIC_PROCESS
RPLP0|RPLP2|RPL23|RPL26|RPS17|RPL21|RPS13|RPL19|RPS29|RPS7|RPS3|RPL12|RPS15A|RPS9|RPL7|RPS18|RPS23|RPL10A|RPL22|RPS8|RPS2|RPS12|RPL15|RPS3A|RPSA|RPS19|RPS14|RPL27|RPS16|RPS5|RPS4X|RPL11|RPS6|RPL6|RPL13A|RPS11|RPL31|RPL18	38	0.8152664859981933	GO_CYTOSOLIC_PART (Geneset_Overlap_Data Set 1) GO_STRUCTURAL_CONSTITUENT_OF_RIBOSOME	false	Geneset_Overlap	GO_CYTOSOLIC_PART (Geneset_Overlap_Data Set 1) GO_STRUCTURAL_CONSTITUENT_OF_RIBOSOME
RPLP0|RPLP2|RPL23|RPL26|RPS17|RPL21|RPS13|RPL19|RPS29|RPS7|RPS3|RPL12|RPS15A|RPS9|RPL7|RPS18|RPS23|RPL10A|RPS25|RPL22|RPS8|RPS2|RPS12|RPL15|RPS3A|RPSA|RPS19|RPS14|RPL27|RPS16|RPS5|RPS4X|RPL11|RPS6|RPL6|RPL13A|RPS11|RPL31|RPL18	39	0.8625	GO_CYTOSOLIC_PART (Geneset_Overlap_Data Set 1) GO_NUCLEAR_TRANSCRIBED_MRNA_CATABOLIC_PROCESS_NONSENSE_MEDIATED_DECAY	false	Geneset_Overlap	GO_CYTOSOLIC_PART (Geneset_Overlap_Data Set 1) GO_NUCLEAR_TRANSCRIBED_MRNA_CATABOLIC_PROCESS_NONSENSE_MEDIATED_DECAY
RPLP0|RPLP2|RPL23|RPL26|RPS17|RPL21|RPS13|RPL19|RPS29|RPS7|RPS3|RPL12|RPS15A|RPS9|RPL7|RPS18|RPS23|RPL10A|RPS25|RPL22|RPS8|RPS2|RPS12|RPL15|RPS3A|RPSA|RPS19|RPS14|RPL27|RPS16|RPS5|RPS4X|RPL11|RPS6|RPL6|RPL13A|RPS11|RPL31|RPL18	39	0.6918767507002801	GO_CYTOSOLIC_PART (Geneset_Overlap_Data Set 1) GO_AMIDE_BIOSYNTHETIC_PROCESS	false	Geneset_Overlap	GO_CYTOSOLIC_PART (Geneset_Overlap_Data Set 1) GO_AMIDE_BIOSYNTHETIC_PROCESS
RPLP0|RPLP2|RPL23|RPL26|RPS17|RPL21|RPS13|RPL19|RPS29|RPS7|RPS3|RPL12|RPS15A|RPS9|RPL7|RPS18|RPS23|RPL10A|RPS25|RPL22|RPS8|RPS2|RPS12|RPL15|RPS3A|RPSA|RPS19|RPS14|RPL27|RPS16|RPS5|RPS4X|RPL11|RPS6|RPL6|RPL13A|RPS11|RPL31|RPL18	39	0.6733977172958736	GO_CYTOSOLIC_PART (Geneset_Overlap_Data Set 1) GO_PROTEIN_TARGETING	false	Geneset_Overlap	GO_CYTOSOLIC_PART (Geneset_Overlap_Data Set 1) GO_PROTEIN_TARGETING
RPL15|RPS2|RPSA|RPS5|RPS11|RPS6|RPL23|RPS7|RPS16|RPL18|RPS17|RPL26|RPLP0|RPL19|RPL21|PABPC1|RPS8|KHSRP|RPL22|RPS14|RPS19|RPS4X|RPL31|RPS3|RPS29|RPS9|RPL10A|RPL7|RPS18|RPS12|RPS25|RPL27|RPS3A|RPL11|RPL6|RPL13A|RPLP2|RPS13|HNRNPD|RPS15A|RPL12|RPS23	42	0.6581339712918661	GO_RNA_PROCESSING (Geneset_Overlap_Data Set 1) GO_MACROMOLECULE_CATABOLIC_PROCESS	false	Geneset_Overlap	GO_RNA_PROCESSING (Geneset_Overlap_Data Set 1) GO_MACROMOLECULE_CATABOLIC_PROCESS
RPL15|RPS2|RPSA|RPS5|RPS11|RPS6|RPL23|RPS7|RPS16|RPL18|RPS17|RPL26|RPLP0|RPL19|RPL21|PABPC1|RPS8|RPL22|RPS14|RPS19|RPS4X|RPL31|RPS3|RPS29|RPS9|RPL10A|RPL7|RPS18|RPS12|RPS25|RPL27|RPS3A|RPL11|RPL6|RPL13A|RPLP2|RPS13|RPS15A|RPL12|RPS23	40	0.645326504481434	GO_RNA_PROCESSING (Geneset_Overlap_Data Set 1) GO_PEPTIDE_METABOLIC_PROCESS	false	Geneset_Overlap	GO_RNA_PROCESSING (Geneset_Overlap_Data Set 1) GO_PEPTIDE_METABOLIC_PROCESS
RPL15|RPS2|RPSA|RPS5|RPS11|RPS6|RPL23|RPS7|RPS16|RPL18|RPS17|RPL26|RPLP0|RPL19|RPL21|RPS8|RPL22|RPS14|RPS19|RPS4X|RPL31|RPS3|RPS29|RPS9|RPL10A|RPL7|RPS18|RPS12|RPL27|RPS3A|RPL11|RPL6|RPL13A|RPLP2|RPS13|RPS15A|RPL12|RPS23	38	0.7910008410428933	GO_RNA_PROCESSING (Geneset_Overlap_Data Set 1) GO_STRUCTURAL_CONSTITUENT_OF_RIBOSOME	false	Geneset_Overlap	GO_RNA_PROCESSING (Geneset_Overlap_Data Set 1) GO_STRUCTURAL_CONSTITUENT_OF_RIBOSOME
RPL15|RPL23|RPL18|RPL26|RPLP0|RPL19|RPL21|RPL22|RPL31|RPL10A|RPL7|RPL27|RPL11|RPL6|RPL13A|RPLP2|RPL12	17	0.6545454545454545	GO_RNA_PROCESSING (Geneset_Overlap_Data Set 1) GO_LARGE_RIBOSOMAL_SUBUNIT	false	Geneset_Overlap	GO_RNA_PROCESSING (Geneset_Overlap_Data Set 1) GO_LARGE_RIBOSOMAL_SUBUNIT
RPL15|RPS2|RPSA|RPS5|RPS11|RPS6|RPL23|RPS7|RPS16|RPL18|RPS17|RPL26|RPLP0|RPL19|RPL21|PABPC1|RPS8|RPL22|RPS14|RPS19|RPS4X|RPL31|RPS3|RPS29|RPS9|RPL10A|RPL7|RPS18|RPS12|RPS25|RPL27|RPS3A|RPL11|RPL6|RPL13A|RPLP2|RPS13|RPS15A|RPL12|RPS23	40	0.5786901270772239	GO_RNA_PROCESSING (Geneset_Overlap_Data Set 1) GO_ORGANONITROGEN_COMPOUND_BIOSYNTHETIC_PROCESS	false	Geneset_Overlap	GO_RNA_PROCESSING (Geneset_Overlap_Data Set 1) GO_ORGANONITROGEN_COMPOUND_BIOSYNTHETIC_PROCESS
RPL15|RPS2|RPSA|RPS5|RPS11|RPS6|RPL23|RPS7|RPS16|RPL18|RPS17|RPL26|RPLP0|RPL19|RPL21|RPS8|RPL22|RPS14|RPS19|RPS4X|RPL31|RPS3|RPS29|RPS9|RPL10A|RPL7|RPS18|RPS12|RPS25|RPL27|RPS3A|RPL11|RPL6|RPL13A|RPLP2|RPS13|RPS15A|RPL12|RPS23	39	0.8357142857142856	GO_MULTI_ORGANISM_METABOLIC_PROCESS (Geneset_Overlap_Data Set 1) GO_RNA_PROCESSING	false	Geneset_Overlap	GO_MULTI_ORGANISM_METABOLIC_PROCESS (Geneset_Overlap_Data Set 1) GO_RNA_PROCESSING
RPL15|RPS2|RPSA|RPS5|RPS11|RPS6|RPL23|RPS7|HSPA8|RPS16|RPL18|RPS17|RPL26|RPLP0|RPL19|RPL21|RPS8|RPL22|RPS14|RPS19|RPS4X|RPL31|RPS3|RPS29|RPS9|RPL10A|RPL7|RPS18|RPS12|RPS25|RPL27|RPS3A|RPL11|RPL6|RPL13A|RPLP2|RPS13|RPS15A|RPL12|RPS23	40	0.569821930646673	GO_RNA_PROCESSING (Geneset_Overlap_Data Set 1) GO_INTRACELLULAR_PROTEIN_TRANSPORT	false	Geneset_Overlap	GO_RNA_PROCESSING (Geneset_Overlap_Data Set 1) GO_INTRACELLULAR_PROTEIN_TRANSPORT
RPS2|RPS11|RPS6|C1QBP|RPL23|RPS7|HSPA8|RPL18|RPL19|RPL21|RPS14|RPS19|RPS3|RPS9|RPL10A|RPL7|RPS25|RPS3A|RPL11|RPL13A|RPS13|RPL12|RPS23	23	0.4568436258577104	GO_RNA_PROCESSING (Geneset_Overlap_Data Set 1) GO_NUCLEOLUS	false	Geneset_Overlap	GO_RNA_PROCESSING (Geneset_Overlap_Data Set 1) GO_NUCLEOLUS
RPS2|RPS5|ELAVL1|SYNCRIP|C1QBP|HNRNPA2B1|HNRNPK|KHSRP|RPS14|HNRNPC|HNRNPA3|RPS3|RPL7|RPL13A|RPS13|HNRNPD	16	0.5847953216374269	GO_RNA_PROCESSING (Geneset_Overlap_Data Set 1) GO_MRNA_BINDING	false	Geneset_Overlap	GO_RNA_PROCESSING (Geneset_Overlap_Data Set 1) GO_MRNA_BINDING
RPL15|RPS2|RPSA|RPS5|RPS11|RPS6|RPL23|RPS7|HSPA8|RPS16|RPL18|RPS17|RPL26|RPLP0|RPL19|RPL21|RPS8|RPL22|RPS14|RPS19|RPS4X|RPL31|RPS3|RPS29|RPS9|RPL10A|RPL7|RPS18|RPS12|RPS25|RPL27|RPS3A|RPL11|RPL6|RPL13A|RPLP2|RPS13|RPS15A|RPL12|RPS23	40	0.6493506493506493	GO_RNA_PROCESSING (Geneset_Overlap_Data Set 1) GO_PROTEIN_TARGETING	false	Geneset_Overlap	GO_RNA_PROCESSING (Geneset_Overlap_Data Set 1) GO_PROTEIN_TARGETING
RPL15|RPS2|RPSA|RPS5|RPS11|RPS6|RPL23|RPS7|RPS16|RPL18|RPS17|RPL26|RPLP0|RPL19|RPL21|RPS8|RPL22|RPS14|RPS19|RPS4X|RPL31|RPS3|RPS29|RPS9|RPL10A|RPL7|RPS18|RPS12|RPS25|RPL27|RPS3A|RPL11|RPL6|RPL13A|RPLP2|RPS13|RPS15A|RPL12|RPS23	39	0.6733977172958736	GO_RNA_PROCESSING (Geneset_Overlap_Data Set 1) GO_CYTOSOLIC_PART	false	Geneset_Overlap	GO_RNA_PROCESSING (Geneset_Overlap_Data Set 1) GO_CYTOSOLIC_PART
RPL15|RPS2|RPSA|RPS5|RPS11|RPS6|RPL23|RPS7|RPS16|RPL18|RPS17|RPL26|RPLP0|RPL19|RPL21|PABPC1|RPS8|RPL22|RPS14|RPS19|RPS4X|RPL31|RPS3|RPS29|RPS9|RPL10A|RPL7|RPS18|RPS12|RPS25|RPL27|RPS3A|RPL11|RPL6|RPL13A|RPLP2|RPS13|RPS15A|RPL12|RPS23	40	0.6303030303030304	GO_RNA_PROCESSING (Geneset_Overlap_Data Set 1) GO_CELLULAR_AMIDE_METABOLIC_PROCESS	false	Geneset_Overlap	GO_RNA_PROCESSING (Geneset_Overlap_Data Set 1) GO_CELLULAR_AMIDE_METABOLIC_PROCESS
RPL15|RPS2|RPSA|RPS5|RPS11|RPS6|RPL23|RPS7|RPS16|RPL18|RPS17|RPL26|RPLP0|RPL19|RPL21|PABPC1|RPS8|RPL22|RPS14|RPS19|RPS4X|RPL31|RPS3|RPS29|RPS9|RPL10A|RPL7|RPS18|RPS12|RPS25|RPL27|RPS3A|RPL11|RPL6|RPL13A|RPLP2|RPS13|RPS15A|RPL12|RPS23	40	0.6951871657754011	GO_RNA_PROCESSING (Geneset_Overlap_Data Set 1) GO_AMIDE_BIOSYNTHETIC_PROCESS	false	Geneset_Overlap	GO_RNA_PROCESSING (Geneset_Overlap_Data Set 1) GO_AMIDE_BIOSYNTHETIC_PROCESS
RPL15|RPS2|RPSA|RPS5|RPS11|RPS6|RPL23|HNRNPA2B1|RPS7|RPS16|RPL18|RPS17|RPL26|RPLP0|RPL19|RPL21|RPS8|RPL22|RPS14|RPS19|RPS4X|RPL31|HSD17B10|RPS3|RPS29|RPS9|RPL10A|RPL7|RPS18|RPS12|RPS25|RPL27|RPS3A|RPL11|RPL6|RPL13A|RPLP2|RPS13|RPS15A|RPL12|RPS23	41	0.8541666666666666	GO_RNA_PROCESSING (Geneset_Overlap_Data Set 1) GO_NCRNA_METABOLIC_PROCESS	false	Geneset_Overlap	GO_RNA_PROCESSING (Geneset_Overlap_Data Set 1) GO_NCRNA_METABOLIC_PROCESS
RPL15|RPS2|RPSA|RPS5|RPS11|RPS6|RPL23|RPS7|RPS16|RPL18|RPS17|RPL26|RPLP0|RPL19|RPL21|RPS8|RPL22|RPS14|RPS19|RPS4X|RPL31|RPS3|RPS29|RPS9|RPL10A|RPL7|RPS18|RPS12|RPS25|RPL27|RPS3A|RPL11|RPL6|RPL13A|RPLP2|RPS13|RPS15A|RPL12|RPS23	39	0.6291933418693982	GO_RNA_PROCESSING (Geneset_Overlap_Data Set 1) GO_PROTEIN_LOCALIZATION_TO_MEMBRANE	false	Geneset_Overlap	GO_RNA_PROCESSING (Geneset_Overlap_Data Set 1) GO_PROTEIN_LOCALIZATION_TO_MEMBRANE
RPL15|RPS2|RPSA|RPS5|RPS11|RPS6|RPL23|RPS7|HSPA8|RPS16|RPL18|RPS17|RPL26|RPLP0|RPL19|RPL21|RPS8|RPL22|RPS14|RPS19|RPS4X|RPL31|RPS3|RPS29|RPS9|RPL10A|RPL7|RPS18|RPS12|RPS25|RPL27|RPS3A|RPL11|RPL6|RPL13A|RPLP2|RPS13|RPS15A|RPL12|RPS23	40	0.6602254428341385	GO_RNA_PROCESSING (Geneset_Overlap_Data Set 1) GO_PROTEIN_LOCALIZATION_TO_ORGANELLE	false	Geneset_Overlap	GO_RNA_PROCESSING (Geneset_Overlap_Data Set 1) GO_PROTEIN_LOCALIZATION_TO_ORGANELLE
RPL15|RPS2|RPSA|RPS5|RPS11|RPS6|RPL23|RPS7|RPS16|RPL18|RPS17|RPL26|RPLP0|RPL19|RPL21|RPS8|RPL22|RPS14|RPS19|RPS4X|RPL31|RPS3|RPS29|RPS9|RPL10A|RPL7|RPS18|RPS12|RPS25|RPL27|RPS3A|RPL11|RPL6|RPL13A|RPLP2|RPS13|RPS15A|RPL12|RPS23	39	0.8545454545454545	GO_RNA_PROCESSING (Geneset_Overlap_Data Set 1) GO_ESTABLISHMENT_OF_PROTEIN_LOCALIZATION_TO_ENDOPLASMIC_RETICULUM	false	Geneset_Overlap	GO_RNA_PROCESSING (Geneset_Overlap_Data Set 1) GO_ESTABLISHMENT_OF_PROTEIN_LOCALIZATION_TO_ENDOPLASMIC_RETICULUM
RPS14|RPS19|RPS9|RPL10A|RPL7|SLC25A3|RPS3|RPL11|RPL13A|RPS25|RPS3A|RPL12|RPS23|RPS13|RPS11|RPS6|RPS2|EIF3A|EEF1A1|RPL23|RPS7|RPL18|RPL21|RPL19	24	0.47670639219934996	GO_PEPTIDE_METABOLIC_PROCESS (Geneset_Overlap_Data Set 1) GO_NUCLEOLUS	false	Geneset_Overlap	GO_PEPTIDE_METABOLIC_PROCESS (Geneset_Overlap_Data Set 1) GO_NUCLEOLUS
RPS4X|RPL31|RPS8|RPL22|RPS14|RPS19|RPS9|RPL10A|RPL7|RPS18|RPS29|RPS3|RPL11|RPL13A|RPL6|RPS12|RPS25|RPL27|RPS3A|RPS15A|RPL12|RPS23|RPLP2|RPS13|RPS5|RPS11|RPS6|RPS2|RPL15|RPSA|RPL23|RPS7|RPS16|RPL18|RPL26|RPS17|RPLP0|RPL21|RPL19	39	0.8482142857142857	GO_PEPTIDE_METABOLIC_PROCESS (Geneset_Overlap_Data Set 1) GO_ESTABLISHMENT_OF_PROTEIN_LOCALIZATION_TO_ENDOPLASMIC_RETICULUM	false	Geneset_Overlap	GO_PEPTIDE_METABOLIC_PROCESS (Geneset_Overlap_Data Set 1) GO_ESTABLISHMENT_OF_PROTEIN_LOCALIZATION_TO_ENDOPLASMIC_RETICULUM
RPS4X|RPL31|RPS8|RPL22|RPS14|RPS19|RPS9|RPL10A|RPL7|RPS18|RPS29|RPS3|RPL11|RPL13A|RPL6|RPS12|RPS25|RPL27|RPS3A|RPS15A|EIF3C|RPL12|RPS23|RPLP2|RPS13|RPS5|RPS11|RPS6|RPS2|RPL15|EIF3A|RPSA|RPL23|RPS7|RPS16|RPL18|RPL26|RPS17|RPLP0|RPL21|RPL19	41	0.7817177476835353	GO_PEPTIDE_METABOLIC_PROCESS (Geneset_Overlap_Data Set 1) GO_RIBONUCLEOPROTEIN_COMPLEX_BIOGENESIS	false	Geneset_Overlap	GO_PEPTIDE_METABOLIC_PROCESS (Geneset_Overlap_Data Set 1) GO_RIBONUCLEOPROTEIN_COMPLEX_BIOGENESIS
RPS4X|RPL31|RPS8|RPL22|RPS14|RPS19|RPS9|RPL10A|RPL7|RPS18|SLC25A3|SLC25A4|RPS29|RPS3|RPL11|RPL13A|RPL6|RPS12|RPL27|RPS3A|RPS15A|SLC25A1|RPL12|RPS23|RPLP2|RPS13|RPS5|RPS11|RPS6|RPS2|RPL15|RPSA|RPL23|RPS7|RPS16|RPL18|RPL26|RPS17|RPLP0|RPL21|RPL19	41	0.8660714285714286	GO_PEPTIDE_METABOLIC_PROCESS (Geneset_Overlap_Data Set 1) GO_STRUCTURAL_CONSTITUENT_OF_RIBOSOME	false	Geneset_Overlap	GO_PEPTIDE_METABOLIC_PROCESS (Geneset_Overlap_Data Set 1) GO_STRUCTURAL_CONSTITUENT_OF_RIBOSOME
RPS4X|RPL31|RPS8|RPL22|RPS14|RPS19|RPS9|EIF5A|GSTP1|RPL10A|RPL7|RPS18|SLC25A3|SLC25A4|EEF2|RPS29|RPS3|RPL11|GSTA3|RPL13A|RPL6|RPS12|RPS25|RPL27|RPS3A|RPS15A|SLC25A1|EIF3C|RPL12|RPS23|RPLP2|RPS13|RPS5|RPS11|RPS6|GARS|RPS2|RPL15|EIF3A|RPSA|TUFM|EEF1A1|RPL23|RPS7|RPS16|RPL18|PABPC1|RPL26|RPS17|RPLP0|RPL21|RPL19	52	0.7813588850174216	GO_PEPTIDE_METABOLIC_PROCESS (Geneset_Overlap_Data Set 1) GO_ORGANONITROGEN_COMPOUND_BIOSYNTHETIC_PROCESS	false	Geneset_Overlap	GO_PEPTIDE_METABOLIC_PROCESS (Geneset_Overlap_Data Set 1) GO_ORGANONITROGEN_COMPOUND_BIOSYNTHETIC_PROCESS
RPL31|RPL22|RPL10A|RPL7|RPL11|RPL13A|RPL6|RPL27|RPL12|RPLP2|RPL15|RPL23|RPL18|RPL26|RPLP0|RPL21|RPL19	17	0.6517857142857143	GO_PEPTIDE_METABOLIC_PROCESS (Geneset_Overlap_Data Set 1) GO_LARGE_RIBOSOMAL_SUBUNIT	false	Geneset_Overlap	GO_PEPTIDE_METABOLIC_PROCESS (Geneset_Overlap_Data Set 1) GO_LARGE_RIBOSOMAL_SUBUNIT
RPS4X|RPL31|RPS8|RPL22|RPS14|RPS19|RPS9|RPL10A|RPL7|RPS18|RPS29|RPS3|RPL11|RPL13A|RPL6|RPS12|RPS25|RPL27|RPS3A|RPS15A|RPL12|RPS23|RPLP2|RPS13|RPS5|RPS11|RPS6|RPS2|RPL15|EIF3A|RPSA|RPL23|RPS7|RPS16|RPL18|RPL26|RPS17|RPLP0|RPL21|RPL19	40	0.8571428571428572	GO_PEPTIDE_METABOLIC_PROCESS (Geneset_Overlap_Data Set 1) GO_MULTI_ORGANISM_METABOLIC_PROCESS	false	Geneset_Overlap	GO_PEPTIDE_METABOLIC_PROCESS (Geneset_Overlap_Data Set 1) GO_MULTI_ORGANISM_METABOLIC_PROCESS
RPS4X|RPL31|RPS8|RPL22|RPS14|RPS19|RPS9|RPL10A|RPL7|RPS18|RPS29|RPS3|RPL11|RPL13A|RPL6|RPS12|RPS25|RPL27|RPS3A|RPS15A|RPL12|RPS23|RPLP2|RPS13|RPS5|RPS11|RPS6|GARS|RPS2|RPL15|RPSA|RPL23|RPS7|RPS16|RPL18|RPL26|RPS17|RPLP0|RPL21|RPL19	40	0.8210180623973727	GO_PEPTIDE_METABOLIC_PROCESS (Geneset_Overlap_Data Set 1) GO_NCRNA_METABOLIC_PROCESS	false	Geneset_Overlap	GO_PEPTIDE_METABOLIC_PROCESS (Geneset_Overlap_Data Set 1) GO_NCRNA_METABOLIC_PROCESS
RPS4X|RPL31|RPS8|RPL22|RPS14|RPS19|RPS9|RPL10A|RPL7|RPS18|RPS29|RPS3|RPL11|RPL13A|RPL6|RPS12|RPS25|RPL27|RPS3A|RPS15A|RPL12|RPS23|RPLP2|RPS13|RPS5|RPS11|RPS6|RPS2|RPL15|RPSA|RPL23|RPS7|RPS16|RPL18|RPL26|RPS17|RPLP0|RPL21|RPL19	39	0.6253787878787879	GO_PEPTIDE_METABOLIC_PROCESS (Geneset_Overlap_Data Set 1) GO_PROTEIN_LOCALIZATION_TO_MEMBRANE	false	Geneset_Overlap	GO_PEPTIDE_METABOLIC_PROCESS (Geneset_Overlap_Data Set 1) GO_PROTEIN_LOCALIZATION_TO_MEMBRANE
RPS4X|RPL31|RPS8|RPL22|RPS14|RPS19|RPS9|EIF5A|GSTP1|SOD1|RPL10A|RPL7|RPS18|SLC25A3|SLC25A4|EEF2|RPS29|RPS3|RPL11|GSTA3|RPL13A|RPL6|RPS12|RPS25|RPL27|NLN|RPS3A|RPS15A|SLC25A1|EIF3C|RPL12|RPS23|RPLP2|RPS13|RPS5|RPS11|RPS6|GARS|RPS2|RPL15|EIF3A|RPSA|TUFM|EEF1A1|RPL23|IDH1|RPS7|RPS16|RPL18|NCSTN|PABPC1|RPL26|RPS17|RPLP0|RPL21|RPL19	56	0.9666666666666667	GO_PEPTIDE_METABOLIC_PROCESS (Geneset_Overlap_Data Set 1) GO_CELLULAR_AMIDE_METABOLIC_PROCESS	false	Geneset_Overlap	GO_PEPTIDE_METABOLIC_PROCESS (Geneset_Overlap_Data Set 1) GO_CELLULAR_AMIDE_METABOLIC_PROCESS
RPS4X|RPL31|RPS8|RPL22|RPS14|RPS19|RPS9|RPL10A|RPL7|RPS18|RPS29|RPS3|RPL11|RPL13A|RPL6|RPS12|RPS25|RPL27|RPS3A|RPS15A|RPL12|RPS23|RPLP2|RPS13|RPS5|RPS11|RPS6|RPS2|RPL15|RPSA|RPL23|RPS7|RPS16|RPL18|PABPC1|RPL26|RPS17|RPLP0|RPL21|RPL19	40	0.667213563029806	GO_PEPTIDE_METABOLIC_PROCESS (Geneset_Overlap_Data Set 1) GO_MRNA_METABOLIC_PROCESS	false	Geneset_Overlap	GO_PEPTIDE_METABOLIC_PROCESS (Geneset_Overlap_Data Set 1) GO_MRNA_METABOLIC_PROCESS
RPS4X|RPL31|RPS8|RPL22|RPS14|RPS19|RPS9|RPL10A|RPL7|RPS18|RPS29|RPS3|RPL11|RPL13A|RPL6|RPS12|RPS25|RPL27|RPS3A|RPS15A|RPL12|RPS23|RPLP2|RPS13|RPS5|RPS11|RPS6|RPS2|RPL15|RPSA|RPL23|RPS7|RPS16|RPL18|PABPC1|RPL26|RPS17|RPLP0|RPL21|RPL19	40	0.8571428571428572	GO_PEPTIDE_METABOLIC_PROCESS (Geneset_Overlap_Data Set 1) GO_NUCLEAR_TRANSCRIBED_MRNA_CATABOLIC_PROCESS_NONSENSE_MEDIATED_DECAY	false	Geneset_Overlap	GO_PEPTIDE_METABOLIC_PROCESS (Geneset_Overlap_Data Set 1) GO_NUCLEAR_TRANSCRIBED_MRNA_CATABOLIC_PROCESS_NONSENSE_MEDIATED_DECAY
RPS4X|RPL31|RPS8|RPL22|RPS14|RPS19|RPS9|RPL10A|RPL7|RPS18|RPS29|RPS3|RPL11|RPL13A|RPL6|RPS12|RPS25|RPL27|RPS3A|RPS15A|RPL12|RPS23|RPLP2|RPS13|RPS5|RPS11|RPS6|RPS2|RPL15|RPSA|RPL23|RPS7|RPS16|RPL18|RPL26|RPS17|RPLP0|RPL21|RPL19	39	0.6691176470588235	GO_PEPTIDE_METABOLIC_PROCESS (Geneset_Overlap_Data Set 1) GO_CYTOSOLIC_PART	false	Geneset_Overlap	GO_PEPTIDE_METABOLIC_PROCESS (Geneset_Overlap_Data Set 1) GO_CYTOSOLIC_PART
RPS4X|RPL31|RPS8|RPL22|RPS14|RPS19|RPS9|RPL10A|RPL7|RPS18|RPS29|RPS3|RPL11|RPL13A|RPL6|RPS12|RPS25|RPL27|RPS3A|RPS15A|RPL12|RPS23|RPLP2|RPS13|RPS5|RPS11|RPS6|RPS2|RPL15|RPSA|RPL23|RPS7|RPS16|RPL18|PABPC1|RPL26|RPS17|RPLP0|RPL21|RPL19	40	0.6103074141048825	GO_PEPTIDE_METABOLIC_PROCESS (Geneset_Overlap_Data Set 1) GO_MACROMOLECULE_CATABOLIC_PROCESS	false	Geneset_Overlap	GO_PEPTIDE_METABOLIC_PROCESS (Geneset_Overlap_Data Set 1) GO_MACROMOLECULE_CATABOLIC_PROCESS
RPS4X|RPL31|RPS8|RPL22|RPS14|RPS19|RPS9|EIF5A|RPL10A|RPL7|RPS18|SLC25A3|SLC25A4|EEF2|RPS29|RPS3|RPL11|RPL13A|RPL6|RPS12|RPS25|RPL27|RPS3A|RPS15A|SLC25A1|EIF3C|RPL12|RPS23|RPLP2|RPS13|RPS5|RPS11|RPS6|GARS|RPS2|RPL15|EIF3A|RPSA|TUFM|EEF1A1|RPL23|RPS7|RPS16|RPL18|PABPC1|RPL26|RPS17|RPLP0|RPL21|RPL19	50	0.9287925696594427	GO_PEPTIDE_METABOLIC_PROCESS (Geneset_Overlap_Data Set 1) GO_AMIDE_BIOSYNTHETIC_PROCESS	false	Geneset_Overlap	GO_PEPTIDE_METABOLIC_PROCESS (Geneset_Overlap_Data Set 1) GO_AMIDE_BIOSYNTHETIC_PROCESS
RPS4X|RPL31|RPS8|RPL22|RPS14|RPS19|RPS9|RPL10A|RPL7|RPS18|RPS29|RPS3|RPL11|RPL13A|RPL6|RPS12|RPS25|RPL27|RPS3A|RPS15A|RPL12|RPS23|RPLP2|RPS13|RPS5|RPS11|RPS6|RPS2|RPL15|RPSA|RPL23|RPS7|RPS16|RPL18|RPL26|RPS17|RPLP0|RPL21|RPL19	39	0.8118166526492852	GO_PEPTIDE_METABOLIC_PROCESS (Geneset_Overlap_Data Set 1) GO_PROTEIN_TARGETING_TO_MEMBRANE	false	Geneset_Overlap	GO_PEPTIDE_METABOLIC_PROCESS (Geneset_Overlap_Data Set 1) GO_PROTEIN_TARGETING_TO_MEMBRANE
RPS4X|RPL31|RPS8|RPL22|RPS14|RPS19|RPS9|RPL10A|RPL7|RPS18|RPS29|RPS3|RPL11|RPL13A|RPL6|RPS12|RPS25|RPL27|RPS3A|RPS15A|RPL12|RPS23|RPLP2|RPS13|RPS5|RPS11|RPS6|RPS2|RPL15|RPSA|RPL23|RPS7|RPS16|RPL18|RPL26|RPS17|RPLP0|RPL21|RPL19	39	0.6253787878787879	GO_PEPTIDE_METABOLIC_PROCESS (Geneset_Overlap_Data Set 1) GO_PROTEIN_TARGETING	false	Geneset_Overlap	GO_PEPTIDE_METABOLIC_PROCESS (Geneset_Overlap_Data Set 1) GO_PROTEIN_TARGETING
RPS3|RPS7|RPS29|RPL19|RPS13|RPL21|RPS17|RPL26|RPL23|RPLP2|RPLP0|RPL10A|RPS23|RPS18|RPL7|RPS9|RPS15A|RPL12|RPL27|RPS14|RPS19|RPSA|RPS3A|RPS2|RPS12|RPL15|RPS8|RPL22|RPS25|RPL18|RPL31|RPS11|RPL13A|RPL6|RPS6|RPL11|RPS4X|RPS5|RPS16	39	0.8357142857142856	GO_RIBOSOMAL_SUBUNIT (Geneset_Overlap_Data Set 1) GO_PROTEIN_LOCALIZATION_TO_MEMBRANE	false	Geneset_Overlap	GO_RIBOSOMAL_SUBUNIT (Geneset_Overlap_Data Set 1) GO_PROTEIN_LOCALIZATION_TO_MEMBRANE
RPL19|RPL21|RPL26|RPL23|RPLP2|RPLP0|RPL10A|RPL7|RPL12|RPL27|RPL15|RPL22|RPL18|RPL31|RPL13A|RPL6|RPL11	17	0.7125	GO_RIBOSOMAL_SUBUNIT (Geneset_Overlap_Data Set 1) GO_LARGE_RIBOSOMAL_SUBUNIT	false	Geneset_Overlap	GO_RIBOSOMAL_SUBUNIT (Geneset_Overlap_Data Set 1) GO_LARGE_RIBOSOMAL_SUBUNIT
RPS3|RPS7|RPS29|RPL19|RPS13|RPL21|RPS17|RPL26|RPL23|RPLP2|RPLP0|RPL10A|RPS23|RPS18|RPL7|RPS9|RPS15A|RPL12|RPL27|RPS14|RPS19|RPSA|RPS3A|RPS2|RPS12|RPL15|RPS8|RPL22|RPS25|RPL18|RPL31|RPS11|RPL13A|RPL6|RPS6|RPL11|RPS4X|RPS5|RPS16	39	0.8625	GO_RIBOSOMAL_SUBUNIT (Geneset_Overlap_Data Set 1) GO_AMIDE_BIOSYNTHETIC_PROCESS	false	Geneset_Overlap	GO_RIBOSOMAL_SUBUNIT (Geneset_Overlap_Data Set 1) GO_AMIDE_BIOSYNTHETIC_PROCESS
RPS3|RPS7|RPS29|RPL19|RPS13|RPL21|RPS17|RPL26|RPL23|RPLP2|RPLP0|RPL10A|RPS23|RPS18|RPL7|RPS9|RPS15A|RPL12|RPL27|RPS14|RPS19|RPSA|RPS3A|RPS2|RPS12|RPL15|RPS8|RPL22|RPL18|RPL31|RPS11|RPL13A|RPL6|RPS6|RPL11|RPS4X|RPS5|RPS16	38	0.916860465116279	GO_RIBOSOMAL_SUBUNIT (Geneset_Overlap_Data Set 1) GO_STRUCTURAL_CONSTITUENT_OF_RIBOSOME	false	Geneset_Overlap	GO_RIBOSOMAL_SUBUNIT (Geneset_Overlap_Data Set 1) GO_STRUCTURAL_CONSTITUENT_OF_RIBOSOME
RPS3|RPS7|RPS29|RPL19|RPS13|RPL21|RPS17|RPL26|RPL23|RPLP2|RPLP0|RPL10A|RPS23|RPS18|RPL7|RPS9|RPS15A|RPL12|RPL27|RPS14|RPS19|RPSA|RPS3A|RPS2|RPS12|RPL15|RPS8|RPL22|RPS25|RPL18|RPL31|RPS11|RPL13A|RPL6|RPS6|RPL11|RPS4X|RPS5|RPS16	39	0.9023936170212765	GO_RIBOSOMAL_SUBUNIT (Geneset_Overlap_Data Set 1) GO_RIBONUCLEOPROTEIN_COMPLEX_BIOGENESIS	false	Geneset_Overlap	GO_RIBOSOMAL_SUBUNIT (Geneset_Overlap_Data Set 1) GO_RIBONUCLEOPROTEIN_COMPLEX_BIOGENESIS
RPS3|RPS7|RPS29|RPL19|RPS13|RPL21|RPS17|RPL26|RPL23|RPLP2|RPLP0|RPL10A|RPS23|RPS18|RPL7|RPS9|RPS15A|RPL12|RPL27|RPS14|RPS19|RPSA|RPS3A|RPS2|RPS12|RPL15|RPS8|RPL22|RPS25|RPL18|RPL31|RPS11|RPL13A|RPL6|RPS6|RPL11|RPS4X|RPS5|RPS16	39	0.8357142857142856	GO_RIBOSOMAL_SUBUNIT (Geneset_Overlap_Data Set 1) GO_PROTEIN_TARGETING	false	Geneset_Overlap	GO_RIBOSOMAL_SUBUNIT (Geneset_Overlap_Data Set 1) GO_PROTEIN_TARGETING
RPS3|RPS7|RPS29|RPL19|RPS13|RPL21|RPS17|RPL26|RPL23|RPLP2|RPLP0|RPL10A|RPS23|RPS18|RPL7|RPS9|RPS15A|RPL12|RPL27|RPS14|RPS19|RPSA|RPS3A|RPS2|RPS12|RPL15|RPS8|RPL22|RPS25|RPL18|HBA1|RPL31|RPS11|RPL13A|RPL6|RPS6|RPL11|RPS4X|RPS5|RPS16	40	0.892156862745098	GO_RIBOSOMAL_SUBUNIT (Geneset_Overlap_Data Set 1) GO_CYTOSOLIC_PART	false	Geneset_Overlap	GO_RIBOSOMAL_SUBUNIT (Geneset_Overlap_Data Set 1) GO_CYTOSOLIC_PART
RPS3|RPS7|RPS29|RPL19|RPS13|RPL21|RPS17|RPL26|RPL23|RPLP2|RPLP0|RPL10A|RPS23|RPS18|RPL7|RPS9|RPS15A|RPL12|RPL27|RPS14|RPS19|RPSA|RPS3A|RPS2|RPS12|RPL15|RPS8|RPL22|RPS25|RPL18|RPL31|RPS11|RPL13A|RPL6|RPS6|RPL11|RPS4X|RPS5|RPS16	39	0.807172131147541	GO_RIBOSOMAL_SUBUNIT (Geneset_Overlap_Data Set 1) GO_CELLULAR_AMIDE_METABOLIC_PROCESS	false	Geneset_Overlap	GO_RIBOSOMAL_SUBUNIT (Geneset_Overlap_Data Set 1) GO_CELLULAR_AMIDE_METABOLIC_PROCESS
RPS3|RPS7|RPS29|RPL19|RPS13|RPL21|RPS17|RPL26|RPL23|RPLP2|RPLP0|RPL10A|RPS23|RPS18|RPL7|RPS9|RPS15A|RPL12|RPL27|RPS14|RPS19|RPSA|RPS3A|RPS2|RPS12|RPL15|RPS8|RPL22|RPS25|RPL18|RPL31|RPS11|RPL13A|RPL6|RPS6|RPL11|RPS4X|RPS5|RPS16	39	0.8296052631578947	GO_RIBOSOMAL_SUBUNIT (Geneset_Overlap_Data Set 1) GO_PEPTIDE_METABOLIC_PROCESS	false	Geneset_Overlap	GO_RIBOSOMAL_SUBUNIT (Geneset_Overlap_Data Set 1) GO_PEPTIDE_METABOLIC_PROCESS
RPS3|RPS7|RPS29|RPL19|RPS13|RPL21|RPS17|RPL26|RPL23|RPLP2|RPLP0|RPL10A|RPS23|RPS18|RPL7|RPS9|RPS15A|RPL12|RPL27|RPS14|RPS19|RPSA|RPS3A|RPS2|RPS12|RPL15|RPS8|RPL22|RPS25|RPL18|RPL31|RPS11|RPL13A|RPL6|RPS6|RPL11|RPS4X|RPS5|RPS16	39	0.963109756097561	GO_RIBOSOMAL_SUBUNIT (Geneset_Overlap_Data Set 1) GO_NUCLEAR_TRANSCRIBED_MRNA_CATABOLIC_PROCESS_NONSENSE_MEDIATED_DECAY	false	Geneset_Overlap	GO_RIBOSOMAL_SUBUNIT (Geneset_Overlap_Data Set 1) GO_NUCLEAR_TRANSCRIBED_MRNA_CATABOLIC_PROCESS_NONSENSE_MEDIATED_DECAY
RPS3|RPS7|RPS29|RPL19|RPS13|RPL21|RPS17|RPL26|RPL23|RPLP2|RPLP0|RPL10A|RPS23|RPS18|RPL7|RPS9|RPS15A|RPL12|RPL27|RPS14|RPS19|RPSA|RPS3A|RPS2|RPS12|RPL15|RPS8|RPL22|RPS25|RPL18|RPL31|RPS11|RPL13A|RPL6|RPS6|RPL11|RPS4X|RPS5|RPS16	39	0.7224397590361445	GO_RIBOSOMAL_SUBUNIT (Geneset_Overlap_Data Set 1) GO_INTRACELLULAR_PROTEIN_TRANSPORT	false	Geneset_Overlap	GO_RIBOSOMAL_SUBUNIT (Geneset_Overlap_Data Set 1) GO_INTRACELLULAR_PROTEIN_TRANSPORT
RPS3|RPS7|RPL19|RPS13|RPL21|RPL23|RPL10A|RPS23|RPL7|RPS9|RPL12|RPS14|RPS19|RPS3A|RPS2|RPS25|RPL18|RPS11|RPL13A|RPS6|RPL11	21	0.45026525198938994	GO_RIBOSOMAL_SUBUNIT (Geneset_Overlap_Data Set 1) GO_NUCLEOLUS	false	Geneset_Overlap	GO_RIBOSOMAL_SUBUNIT (Geneset_Overlap_Data Set 1) GO_NUCLEOLUS
RPS3|RPS7|RPS29|RPL19|RPS13|RPL21|RPS17|RPL26|RPL23|RPLP2|RPLP0|RPL10A|RPS23|RPS18|RPL7|RPS9|RPS15A|RPL12|RPL27|RPS14|RPS19|RPSA|RPS3A|RPS2|RPS12|RPL15|RPS8|RPL22|RPS25|RPL18|RPL31|RPS11|RPL13A|RPL6|RPS6|RPL11|RPS4X|RPS5|RPS16	39	0.8357142857142856	GO_RIBOSOMAL_SUBUNIT (Geneset_Overlap_Data Set 1) GO_RNA_PROCESSING	false	Geneset_Overlap	GO_RIBOSOMAL_SUBUNIT (Geneset_Overlap_Data Set 1) GO_RNA_PROCESSING
RPS3|RPS7|RPS29|RPL19|RPS13|RPL21|RPS17|RPL26|RPL23|RPLP2|RPLP0|RPL10A|RPS23|RPS18|RPL7|RPS9|RPS15A|RPL12|RPL27|RPS14|RPS19|RPSA|RPS3A|RPS2|RPS12|RPL15|RPS8|RPL22|RPS25|RPL18|RPL31|RPS11|RPL13A|RPL6|RPS6|RPL11|RPS4X|RPS5|RPS16	39	0.963109756097561	GO_RIBOSOMAL_SUBUNIT (Geneset_Overlap_Data Set 1) GO_MULTI_ORGANISM_METABOLIC_PROCESS	false	Geneset_Overlap	GO_RIBOSOMAL_SUBUNIT (Geneset_Overlap_Data Set 1) GO_MULTI_ORGANISM_METABOLIC_PROCESS
RPS3|RPS7|RPS29|RPL19|RPS13|RPL21|RPS17|RPL26|RPL23|RPLP2|RPLP0|RPL10A|RPS23|RPS18|RPL7|RPS9|RPS15A|RPL12|RPL27|RPS14|RPS19|RPSA|RPS3A|RPS2|RPS12|RPL15|RPS8|RPL22|RPS25|RPL18|RPL31|RPS11|RPL13A|RPL6|RPS6|RPL11|RPS4X|RPS5|RPS16	39	0.9409883720930232	GO_RIBOSOMAL_SUBUNIT (Geneset_Overlap_Data Set 1) GO_NCRNA_METABOLIC_PROCESS	false	Geneset_Overlap	GO_RIBOSOMAL_SUBUNIT (Geneset_Overlap_Data Set 1) GO_NCRNA_METABOLIC_PROCESS
RPS3|RPS7|RPS29|RPL19|RPS13|RPL21|RPS17|RPL26|RPL23|RPLP2|RPLP0|RPL10A|RPS23|RPS18|RPL7|RPS9|RPS15A|RPL12|RPL27|RPS14|RPS19|RPSA|RPS3A|RPS2|RPS12|RPL15|RPS8|RPL22|RPS25|RPL18|RPL31|RPS11|RPL13A|RPL6|RPS6|RPL11|RPS4X|RPS5|RPS16	39	0.7343354430379747	GO_RIBOSOMAL_SUBUNIT (Geneset_Overlap_Data Set 1) GO_ORGANONITROGEN_COMPOUND_BIOSYNTHETIC_PROCESS	false	Geneset_Overlap	GO_RIBOSOMAL_SUBUNIT (Geneset_Overlap_Data Set 1) GO_ORGANONITROGEN_COMPOUND_BIOSYNTHETIC_PROCESS
RPS3|RPS7|RPS29|RPL19|RPS13|RPL21|RPS17|RPL26|RPL23|RPLP2|RPLP0|RPL10A|RPS23|RPS18|RPL7|RPS9|RPS15A|RPL12|RPL27|RPS14|RPS19|RPSA|RPS3A|RPS2|RPS12|RPL15|RPS8|RPL22|RPS25|RPL18|RPL31|RPS11|RPL13A|RPL6|RPS6|RPL11|RPS4X|RPS5|RPS16	39	0.9517857142857142	GO_RIBOSOMAL_SUBUNIT (Geneset_Overlap_Data Set 1) GO_PROTEIN_TARGETING_TO_MEMBRANE	false	Geneset_Overlap	GO_RIBOSOMAL_SUBUNIT (Geneset_Overlap_Data Set 1) GO_PROTEIN_TARGETING_TO_MEMBRANE
RPS3|RPS7|RPS29|RPL19|RPS13|RPL21|RPS17|RPL26|RPL23|RPLP2|RPLP0|RPL10A|RPS23|RPS18|RPL7|RPS9|RPS15A|RPL12|RPL27|RPS14|RPS19|RPSA|RPS3A|RPS2|RPS12|RPL15|RPS8|RPL22|RPS25|RPL18|RPL31|RPS11|RPL13A|RPL6|RPS6|RPL11|RPS4X|RPS5|RPS16	39	0.8420454545454545	GO_RIBOSOMAL_SUBUNIT (Geneset_Overlap_Data Set 1) GO_PROTEIN_LOCALIZATION_TO_ORGANELLE	false	Geneset_Overlap	GO_RIBOSOMAL_SUBUNIT (Geneset_Overlap_Data Set 1) GO_PROTEIN_LOCALIZATION_TO_ORGANELLE
RPS3|RPS7|RPS29|RPL19|RPS13|RPL21|RPS17|RPL26|RPL23|RPLP2|RPLP0|RPL10A|RPS23|RPS18|RPL7|RPS9|RPS15A|RPL12|RPL27|RPS14|RPS19|RPSA|RPS3A|RPS2|RPS12|RPL15|RPS8|RPL22|RPS25|RPL18|RPL31|RPS11|RPL13A|RPL6|RPS6|RPL11|RPS4X|RPS5|RPS16	39	0.8486111111111111	GO_RIBOSOMAL_SUBUNIT (Geneset_Overlap_Data Set 1) GO_MRNA_METABOLIC_PROCESS	false	Geneset_Overlap	GO_RIBOSOMAL_SUBUNIT (Geneset_Overlap_Data Set 1) GO_MRNA_METABOLIC_PROCESS
RPS3|RPS7|RPS29|RPL19|RPS13|RPL21|RPS17|RPL26|RPL23|RPLP2|RPLP0|RPL10A|RPS23|RPS18|RPL7|RPS9|RPS15A|RPL12|RPL27|RPS14|RPS19|RPSA|RPS3A|RPS2|RPS12|RPL15|RPS8|RPL22|RPS25|RPL18|RPL31|RPS11|RPL13A|RPL6|RPS6|RPL11|RPS4X|RPS5|RPS16	39	0.7921875	GO_RIBOSOMAL_SUBUNIT (Geneset_Overlap_Data Set 1) GO_MACROMOLECULE_CATABOLIC_PROCESS	false	Geneset_Overlap	GO_RIBOSOMAL_SUBUNIT (Geneset_Overlap_Data Set 1) GO_MACROMOLECULE_CATABOLIC_PROCESS
RPS3|RPS7|RPS29|RPL19|RPS13|RPL21|RPS17|RPL26|RPL23|RPLP2|RPLP0|RPL10A|RPS23|RPS18|RPL7|RPS9|RPS15A|RPL12|RPL27|RPS14|RPS19|RPSA|RPS3A|RPS2|RPS12|RPL15|RPS8|RPL22|RPS25|RPL18|RPL31|RPS11|RPL13A|RPL6|RPS6|RPL11|RPS4X|RPS5|RPS16	39	0.9875	GO_RIBOSOMAL_SUBUNIT (Geneset_Overlap_Data Set 1) GO_ESTABLISHMENT_OF_PROTEIN_LOCALIZATION_TO_ENDOPLASMIC_RETICULUM	false	Geneset_Overlap	GO_RIBOSOMAL_SUBUNIT (Geneset_Overlap_Data Set 1) GO_ESTABLISHMENT_OF_PROTEIN_LOCALIZATION_TO_ENDOPLASMIC_RETICULUM
RPS5|RPS16|RPL11|RPS4X|RPL31|RPS11|RPS6|RPL13A|RPL6|RPL18|RPL22|RPS25|RPL15|RPS2|RPS12|RPS8|RPSA|RPS19|RPS3A|RPL27|RPS14|RPL12|RPS15A|RPS9|RPL10A|RPS23|RPL7|RPS18|RPLP2|RPLP0|RPS17|RPL26|RPL23|RPL19|RPL21|RPS13|RPS3|RPS7|RPS29	39	0.8622448979591837	GO_RNA_CATABOLIC_PROCESS (Geneset_Overlap_Data Set 1) GO_RIBONUCLEOPROTEIN_COMPLEX_BIOGENESIS	false	Geneset_Overlap	GO_RNA_CATABOLIC_PROCESS (Geneset_Overlap_Data Set 1) GO_RIBONUCLEOPROTEIN_COMPLEX_BIOGENESIS
RPS5|RPS16|RPL11|RPS4X|RPL31|RPS11|RPS6|RPL13A|RPL6|RPL18|RPL22|RPS25|RPL15|RPS2|RPS12|RPS8|RPSA|RPS19|RPS3A|RPL27|RPS14|RPL12|RPS15A|RPS9|RPL10A|RPS23|RPL7|RPS18|RPLP2|RPLP0|RPS17|RPL26|RPL23|RPL19|RPL21|RPS13|RPS3|RPS7|RPS29	39	0.9409883720930232	GO_RNA_CATABOLIC_PROCESS (Geneset_Overlap_Data Set 1) GO_RIBOSOMAL_SUBUNIT	false	Geneset_Overlap	GO_RNA_CATABOLIC_PROCESS (Geneset_Overlap_Data Set 1) GO_RIBOSOMAL_SUBUNIT
RPS5|RPS16|RPL11|RPS4X|RPL31|RPS11|RPS6|RPL13A|RPL6|RPL18|RPL22|RPS25|RPL15|RPS2|RPS12|RPS8|RPSA|RPS19|RPS3A|RPL27|RPS14|RPL12|RPS15A|RPS9|RPL10A|RPS23|RPL7|RPS18|PABPC1|RPLP2|RPLP0|RPS17|RPL26|RPL23|RPL19|RPL21|RPS13|RPS3|RPS7|RPS29	40	0.8535489667565139	GO_RNA_CATABOLIC_PROCESS (Geneset_Overlap_Data Set 1) GO_AMIDE_BIOSYNTHETIC_PROCESS	false	Geneset_Overlap	GO_RNA_CATABOLIC_PROCESS (Geneset_Overlap_Data Set 1) GO_AMIDE_BIOSYNTHETIC_PROCESS
RPS5|RPS16|RPL11|RPS4X|RPL31|RPS11|RPS6|RPL13A|RPL6|RPL18|RPL22|RPS25|RPL15|RPS2|RPS12|RPS8|RPSA|RPS19|RPS3A|RPL27|RPS14|RPL12|RPS15A|RPS9|RPL10A|RPS23|RPL7|RPS18|PABPC1|RPLP2|RPLP0|RPS17|RPL26|RPL23|RPL19|RPL21|RPS13|RPS3|RPS7|RPS29	40	0.9761904761904762	GO_RNA_CATABOLIC_PROCESS (Geneset_Overlap_Data Set 1) GO_NUCLEAR_TRANSCRIBED_MRNA_CATABOLIC_PROCESS_NONSENSE_MEDIATED_DECAY	false	Geneset_Overlap	GO_RNA_CATABOLIC_PROCESS (Geneset_Overlap_Data Set 1) GO_NUCLEAR_TRANSCRIBED_MRNA_CATABOLIC_PROCESS_NONSENSE_MEDIATED_DECAY
RPL11|RPS11|RPS6|RPL13A|RPL18|RPS25|RPS2|RPS19|RPS3A|RPS14|RPL12|RPS9|RPL10A|RPS23|RPL7|RPL23|RPL19|RPL21|RPS13|RPS3|RPS7	21	0.4442307692307692	GO_RNA_CATABOLIC_PROCESS (Geneset_Overlap_Data Set 1) GO_NUCLEOLUS	false	Geneset_Overlap	GO_RNA_CATABOLIC_PROCESS (Geneset_Overlap_Data Set 1) GO_NUCLEOLUS
RPS5|RPS16|RPL11|RPS4X|RPL31|RPS11|RPS6|RPL13A|RPL6|RPL18|RPL22|RPS25|RPL15|RPS2|RPS12|RPS8|RPSA|RPS19|RPS3A|RPL27|RPS14|RPL12|RPS15A|RPS9|RPL10A|RPS23|RPL7|RPS18|RPLP2|RPLP0|RPS17|RPL26|RPL23|RPL19|RPL21|RPS13|RPS3|RPS7|RPS29	39	0.8063909774436091	GO_RNA_CATABOLIC_PROCESS (Geneset_Overlap_Data Set 1) GO_PROTEIN_LOCALIZATION_TO_ORGANELLE	false	Geneset_Overlap	GO_RNA_CATABOLIC_PROCESS (Geneset_Overlap_Data Set 1) GO_PROTEIN_LOCALIZATION_TO_ORGANELLE
RPS5|RPS16|RPL11|RPS4X|RPL31|RPS11|RPS6|RPL13A|RPL6|RPL18|KHSRP|RPL22|RPS25|RPL15|RPS2|RPS12|RPS8|RPSA|RPS19|RPS3A|RPL27|RPS14|RPL12|RPS15A|RPS9|RPL10A|RPS23|RPL7|RPS18|PABPC1|RPLP2|RPLP0|RPS17|RPL26|RPL23|RPL19|RPL21|RPS13|HNRNPD|RPS3|RPS7|RPS29	42	0.8818181818181818	GO_RNA_CATABOLIC_PROCESS (Geneset_Overlap_Data Set 1) GO_RNA_PROCESSING	false	Geneset_Overlap	GO_RNA_CATABOLIC_PROCESS (Geneset_Overlap_Data Set 1) GO_RNA_PROCESSING
RPS5|RPS16|RPL11|RPS4X|RPL31|RPS11|RPS6|RPL13A|RPL6|RPL18|RPL22|RPS25|RPL15|RPS2|RPS12|RPS8|RPSA|RPS19|RPS3A|RPL27|RPS14|RPL12|RPS15A|RPS9|RPL10A|RPS23|RPL7|RPS18|RPLP2|RPLP0|RPS17|RPL26|RPL23|RPL19|RPL21|RPS13|RPS3|RPS7|RPS29	39	0.9409883720930232	GO_RNA_CATABOLIC_PROCESS (Geneset_Overlap_Data Set 1) GO_MULTI_ORGANISM_METABOLIC_PROCESS	false	Geneset_Overlap	GO_RNA_CATABOLIC_PROCESS (Geneset_Overlap_Data Set 1) GO_MULTI_ORGANISM_METABOLIC_PROCESS
RPL11|RPL31|RPL13A|RPL6|RPL18|RPL22|RPL15|RPL27|RPL12|RPL10A|RPL7|RPLP2|RPLP0|RPL26|RPL23|RPL19|RPL21	17	0.7023809523809523	GO_RNA_CATABOLIC_PROCESS (Geneset_Overlap_Data Set 1) GO_LARGE_RIBOSOMAL_SUBUNIT	false	Geneset_Overlap	GO_RNA_CATABOLIC_PROCESS (Geneset_Overlap_Data Set 1) GO_LARGE_RIBOSOMAL_SUBUNIT
RPS5|RPS16|RPL11|RPS4X|RPL31|RPS11|RPS6|RPL13A|RPL6|RPL18|RPL22|RPS25|RPL15|RPS2|RPS12|RPS8|RPSA|RPS19|RPS3A|RPL27|RPS14|RPL12|RPS15A|RPS9|RPL10A|RPS23|RPL7|RPS18|PABPC1|RPLP2|RPLP0|RPS17|RPL26|RPL23|RPL19|RPL21|RPS13|RPS3|RPS7|RPS29	40	0.7261904761904762	GO_RNA_CATABOLIC_PROCESS (Geneset_Overlap_Data Set 1) GO_ORGANONITROGEN_COMPOUND_BIOSYNTHETIC_PROCESS	false	Geneset_Overlap	GO_RNA_CATABOLIC_PROCESS (Geneset_Overlap_Data Set 1) GO_ORGANONITROGEN_COMPOUND_BIOSYNTHETIC_PROCESS
RPS5|RPS16|RPL11|RPS4X|RPL31|RPS11|RPS6|RPL13A|RPL6|RPL18|RPL22|RPS25|RPL15|RPS2|RPS12|RPS8|RPSA|RPS19|RPS3A|RPL27|RPS14|RPL12|RPS15A|RPS9|RPL10A|RPS23|RPL7|RPS18|RPLP2|RPLP0|RPS17|RPL26|RPL23|RPL19|RPL21|RPS13|RPS3|RPS7|RPS29	39	0.8976190476190476	GO_RNA_CATABOLIC_PROCESS (Geneset_Overlap_Data Set 1) GO_NCRNA_METABOLIC_PROCESS	false	Geneset_Overlap	GO_RNA_CATABOLIC_PROCESS (Geneset_Overlap_Data Set 1) GO_NCRNA_METABOLIC_PROCESS
RPS5|RPS16|RPL11|RPS4X|RPL31|RPS11|RPS6|RPL13A|RPL6|RPL18|KHSRP|RPL22|RPS25|RPL15|RPS2|RPS12|RPS8|RPSA|RPS19|RPS3A|RPL27|RPS14|RPL12|RPS15A|RPS9|RPL10A|RPS23|RPL7|RPS18|PABPC1|RPLP2|RPLP0|RPS17|RPL26|RPL23|RPL19|RPL21|RPS13|HNRNPD|RPS3|RPS7|RPS29	42	0.8333333333333333	GO_RNA_CATABOLIC_PROCESS (Geneset_Overlap_Data Set 1) GO_MACROMOLECULE_CATABOLIC_PROCESS	false	Geneset_Overlap	GO_RNA_CATABOLIC_PROCESS (Geneset_Overlap_Data Set 1) GO_MACROMOLECULE_CATABOLIC_PROCESS
RPS5|RPS16|RPL11|RPS4X|RPL31|RPS11|RPS6|RPL13A|RPL6|RPL18|RPL22|RPL15|RPS2|RPS12|RPS8|RPSA|RPS19|RPS3A|RPL27|RPS14|RPL12|RPS15A|RPS9|RPL10A|RPS23|RPL7|RPS18|RPLP2|RPLP0|RPS17|RPL26|RPL23|RPL19|RPL21|RPS13|RPS3|RPS7|RPS29	38	0.8856368563685637	GO_RNA_CATABOLIC_PROCESS (Geneset_Overlap_Data Set 1) GO_STRUCTURAL_CONSTITUENT_OF_RIBOSOME	false	Geneset_Overlap	GO_RNA_CATABOLIC_PROCESS (Geneset_Overlap_Data Set 1) GO_STRUCTURAL_CONSTITUENT_OF_RIBOSOME
RPS5|RPS16|RPL11|RPS4X|RPL31|RPS11|RPS6|RPL13A|RPL6|RPL18|RPL22|RPS25|RPL15|RPS2|RPS12|RPS8|RPSA|RPS19|RPS3A|RPL27|RPS14|RPL12|RPS15A|RPS9|RPL10A|RPS23|RPL7|RPS18|PABPC1|RPLP2|RPLP0|RPS17|RPL26|RPL23|RPL19|RPL21|RPS13|RPS3|RPS7|RPS29	40	0.8210180623973727	GO_RNA_CATABOLIC_PROCESS (Geneset_Overlap_Data Set 1) GO_PEPTIDE_METABOLIC_PROCESS	false	Geneset_Overlap	GO_RNA_CATABOLIC_PROCESS (Geneset_Overlap_Data Set 1) GO_PEPTIDE_METABOLIC_PROCESS
RPS5|RPS16|RPL11|RPS4X|RPL31|RPS11|RPS6|RPL13A|RPL6|RPL18|RPL22|RPS25|RPL15|RPS2|RPS12|RPS8|RPSA|RPS19|RPS3A|RPL27|RPS14|RPL12|RPS15A|RPS9|RPL10A|RPS23|RPL7|RPS18|RPLP2|RPLP0|RPS17|RPL26|RPL23|RPL19|RPL21|RPS13|RPS3|RPS7|RPS29	39	0.9187915742793791	GO_RNA_CATABOLIC_PROCESS (Geneset_Overlap_Data Set 1) GO_PROTEIN_TARGETING_TO_MEMBRANE	false	Geneset_Overlap	GO_RNA_CATABOLIC_PROCESS (Geneset_Overlap_Data Set 1) GO_PROTEIN_TARGETING_TO_MEMBRANE
RPS5|RPS16|RPL11|RPS4X|RPL31|RPS11|RPS6|RPL13A|RPL6|RPL18|KHSRP|RPL22|RPS25|RPL15|RPS2|RPS12|RPS8|RPSA|RPS19|RPS3A|RPL27|RPS14|RPL12|RPS15A|RPS9|RPL10A|RPS23|RPL7|RPS18|PABPC1|RPLP2|RPLP0|RPS17|RPL26|RPL23|RPL19|RPL21|RPS13|HNRNPD|RPS3|RPS7|RPS29	42	0.8962264150943396	GO_RNA_CATABOLIC_PROCESS (Geneset_Overlap_Data Set 1) GO_MRNA_METABOLIC_PROCESS	false	Geneset_Overlap	GO_RNA_CATABOLIC_PROCESS (Geneset_Overlap_Data Set 1) GO_MRNA_METABOLIC_PROCESS
RPS5|RPS16|RPL11|RPS4X|RPL31|RPS11|RPS6|RPL13A|RPL6|RPL18|RPL22|RPS25|RPL15|RPS2|RPS12|RPS8|RPSA|RPS19|RPS3A|RPL27|RPS14|RPL12|RPS15A|RPS9|RPL10A|RPS23|RPL7|RPS18|RPLP2|RPLP0|RPS17|RPL26|RPL23|RPL19|RPL21|RPS13|RPS3|RPS7|RPS29	39	0.8253968253968254	GO_RNA_CATABOLIC_PROCESS (Geneset_Overlap_Data Set 1) GO_CYTOSOLIC_PART	false	Geneset_Overlap	GO_RNA_CATABOLIC_PROCESS (Geneset_Overlap_Data Set 1) GO_CYTOSOLIC_PART
RPS5|RPS16|RPL11|RPS4X|RPL31|RPS11|RPS6|RPL13A|RPL6|RPL18|RPL22|RPS25|RPL15|RPS2|RPS12|RPS8|RPSA|RPS19|RPS3A|RPL27|RPS14|RPL12|RPS15A|RPS9|RPL10A|RPS23|RPL7|RPS18|PABPC1|RPLP2|RPLP0|RPS17|RPL26|RPL23|RPL19|RPL21|RPS13|RPS3|RPS7|RPS29	40	0.7987711213517665	GO_RNA_CATABOLIC_PROCESS (Geneset_Overlap_Data Set 1) GO_CELLULAR_AMIDE_METABOLIC_PROCESS	false	Geneset_Overlap	GO_RNA_CATABOLIC_PROCESS (Geneset_Overlap_Data Set 1) GO_CELLULAR_AMIDE_METABOLIC_PROCESS
RPS5|RPS16|RPL11|RPS4X|RPL31|RPS11|RPS6|RPL13A|RPL6|RPL18|RPL22|RPS25|RPL15|RPS2|RPS12|RPS8|RPSA|RPS19|RPS3A|RPL27|RPS14|RPL12|RPS15A|RPS9|RPL10A|RPS23|RPL7|RPS18|RPLP2|RPLP0|RPS17|RPL26|RPL23|RPL19|RPL21|RPS13|RPS3|RPS7|RPS29	39	0.9642857142857143	GO_RNA_CATABOLIC_PROCESS (Geneset_Overlap_Data Set 1) GO_ESTABLISHMENT_OF_PROTEIN_LOCALIZATION_TO_ENDOPLASMIC_RETICULUM	false	Geneset_Overlap	GO_RNA_CATABOLIC_PROCESS (Geneset_Overlap_Data Set 1) GO_ESTABLISHMENT_OF_PROTEIN_LOCALIZATION_TO_ENDOPLASMIC_RETICULUM
RPS5|RPS16|RPL11|RPS4X|RPL31|RPS11|RPS6|RPL13A|RPL6|RPL18|RPL22|RPS25|RPL15|RPS2|RPS12|RPS8|RPSA|RPS19|RPS3A|RPL27|RPS14|RPL12|RPS15A|RPS9|RPL10A|RPS23|RPL7|RPS18|RPLP2|RPLP0|RPS17|RPL26|RPL23|RPL19|RPL21|RPS13|RPS3|RPS7|RPS29	39	0.8004926108374384	GO_RNA_CATABOLIC_PROCESS (Geneset_Overlap_Data Set 1) GO_PROTEIN_LOCALIZATION_TO_MEMBRANE	false	Geneset_Overlap	GO_RNA_CATABOLIC_PROCESS (Geneset_Overlap_Data Set 1) GO_PROTEIN_LOCALIZATION_TO_MEMBRANE
RPS5|RPS16|RPL11|RPS4X|RPL31|RPS11|RPS6|RPL13A|RPL6|RPL18|RPL22|RPS25|RPL15|RPS2|RPS12|RPS8|RPSA|RPS19|RPS3A|RPL27|RPS14|RPL12|RPS15A|RPS9|RPL10A|RPS23|RPL7|RPS18|RPLP2|RPLP0|RPS17|RPL26|RPL23|RPL19|RPL21|RPS13|RPS3|RPS7|RPS29	39	0.6936974789915966	GO_RNA_CATABOLIC_PROCESS (Geneset_Overlap_Data Set 1) GO_INTRACELLULAR_PROTEIN_TRANSPORT	false	Geneset_Overlap	GO_RNA_CATABOLIC_PROCESS (Geneset_Overlap_Data Set 1) GO_INTRACELLULAR_PROTEIN_TRANSPORT
RPS5|RPS16|RPL11|RPS4X|RPL31|RPS11|RPS6|RPL13A|RPL6|RPL18|RPL22|RPS25|RPL15|RPS2|RPS12|RPS8|RPSA|RPS19|RPS3A|RPL27|RPS14|RPL12|RPS15A|RPS9|RPL10A|RPS23|RPL7|RPS18|RPLP2|RPLP0|RPS17|RPL26|RPL23|RPL19|RPL21|RPS13|RPS3|RPS7|RPS29	39	0.8004926108374384	GO_RNA_CATABOLIC_PROCESS (Geneset_Overlap_Data Set 1) GO_PROTEIN_TARGETING	false	Geneset_Overlap	GO_RNA_CATABOLIC_PROCESS (Geneset_Overlap_Data Set 1) GO_PROTEIN_TARGETING
RPL22|RPL15|RPL31|RPL23|RPL7|RPL10A|RPL27|RPL6|RPL13A|RPL18|RPL11|RPL21|RPL19|RPLP0|RPLP2|RPL26|RPL12	17	0.67	GO_ESTABLISHMENT_OF_PROTEIN_LOCALIZATION_TO_MEMBRANE (Geneset_Overlap_Data Set 1) GO_LARGE_RIBOSOMAL_SUBUNIT	false	Geneset_Overlap	GO_ESTABLISHMENT_OF_PROTEIN_LOCALIZATION_TO_MEMBRANE (Geneset_Overlap_Data Set 1) GO_LARGE_RIBOSOMAL_SUBUNIT
RPS19|RPSA|RPS14|RPL22|RPS8|RPS2|RPL15|RPS6|RPS11|RPL31|RPS5|RPS4X|RPS29|RPS7|RPS3|RPL23|RPS18|RPL7|RPL10A|RPS9|RPS3A|RPL27|RPS25|RPS12|RPL6|RPL13A|RPL18|RPS16|RPL11|RPS13|RPL21|RPL19|RPLP0|RPLP2|RPL26|RPS17|RPS23|RPL12|RPS15A	39	0.681044776119403	GO_ESTABLISHMENT_OF_PROTEIN_LOCALIZATION_TO_MEMBRANE (Geneset_Overlap_Data Set 1) GO_PEPTIDE_METABOLIC_PROCESS	false	Geneset_Overlap	GO_ESTABLISHMENT_OF_PROTEIN_LOCALIZATION_TO_MEMBRANE (Geneset_Overlap_Data Set 1) GO_PEPTIDE_METABOLIC_PROCESS
RPS19|RPSA|RPS14|RPL22|RPS8|RPS2|RPL15|RPS6|RPS11|RPL31|RPS5|RPS4X|RPS29|RPS7|RPS3|RPL23|RPS18|RPL7|RPL10A|RPS9|RPS3A|RPL27|RPS25|RPS12|RPL6|RPL13A|RPL18|RPS16|RPL11|RPS13|RPL21|RPL19|RPLP0|RPLP2|RPL26|RPS17|RPS23|RPL12|RPS15A	39	0.6646478873239436	GO_ESTABLISHMENT_OF_PROTEIN_LOCALIZATION_TO_MEMBRANE (Geneset_Overlap_Data Set 1) GO_CELLULAR_AMIDE_METABOLIC_PROCESS	false	Geneset_Overlap	GO_ESTABLISHMENT_OF_PROTEIN_LOCALIZATION_TO_MEMBRANE (Geneset_Overlap_Data Set 1) GO_CELLULAR_AMIDE_METABOLIC_PROCESS
RPS19|RPSA|RPS14|RPL22|RPS8|RPS2|RPL15|RPS6|RPS11|RPL31|RPS5|RPS4X|RPS29|RPS7|RPS3|RPL23|RPS18|RPL7|RPL10A|RPS9|RPS3A|RPL27|RPS25|RPS12|RPL6|RPL13A|RPL18|RPS16|RPL11|RPS13|RPL21|RPL19|RPLP0|RPLP2|RPL26|RPS17|RPS23|RPL12|RPS15A	39	0.7045161290322581	GO_ESTABLISHMENT_OF_PROTEIN_LOCALIZATION_TO_MEMBRANE (Geneset_Overlap_Data Set 1) GO_CYTOSOLIC_PART	false	Geneset_Overlap	GO_ESTABLISHMENT_OF_PROTEIN_LOCALIZATION_TO_MEMBRANE (Geneset_Overlap_Data Set 1) GO_CYTOSOLIC_PART
RPS19|RPSA|RPS14|RPL22|RPS8|RPS2|RPL15|RPS6|RPS11|RPL31|RPS5|RPS4X|RPS29|RPS7|RPS3|RPL23|RPS18|RPL7|RPL10A|RPS9|RPS3A|RPL27|RPS12|RPL6|RPL13A|RPL18|RPS16|RPL11|RPS13|RPL21|RPL19|RPLP0|RPLP2|RPL26|RPS17|RPS23|RPL12|RPS15A	38	0.8219052001840773	GO_ESTABLISHMENT_OF_PROTEIN_LOCALIZATION_TO_MEMBRANE (Geneset_Overlap_Data Set 1) GO_STRUCTURAL_CONSTITUENT_OF_RIBOSOME	false	Geneset_Overlap	GO_ESTABLISHMENT_OF_PROTEIN_LOCALIZATION_TO_MEMBRANE (Geneset_Overlap_Data Set 1) GO_STRUCTURAL_CONSTITUENT_OF_RIBOSOME
RPS19|RPSA|RPS14|RPL22|RPS8|RPS2|RPL15|RPS6|RPS11|RPL31|RPS5|RPS4X|RPS29|RPS7|RPS3|RPL23|RPS18|RPL7|RPL10A|RPS9|RPS3A|RPL27|RPS25|RPS12|RPL6|RPL13A|RPL18|RPS16|RPL11|RPS13|RPL21|RPL19|RPLP0|RPLP2|RPL26|RPS17|RPS23|RPL12|RPS15A	39	0.6946875	GO_ESTABLISHMENT_OF_PROTEIN_LOCALIZATION_TO_MEMBRANE (Geneset_Overlap_Data Set 1) GO_MRNA_METABOLIC_PROCESS	false	Geneset_Overlap	GO_ESTABLISHMENT_OF_PROTEIN_LOCALIZATION_TO_MEMBRANE (Geneset_Overlap_Data Set 1) GO_MRNA_METABOLIC_PROCESS
RPS19|RPSA|RPS14|RPL22|RPS8|RPS2|RPL15|RPS6|RPS11|RPL31|RPS5|RPS4X|RPS29|RPS7|RPS3|RPL23|RPS18|RPL7|RPL10A|RPS9|RPS3A|RPL27|RPS25|RPS12|RPL6|RPL13A|RPL18|RPS16|RPL11|RPS13|RPL21|RPL19|RPLP0|RPLP2|RPL26|RPS17|RPS23|RPL12|RPS15A	39	0.8698529411764706	GO_ESTABLISHMENT_OF_PROTEIN_LOCALIZATION_TO_MEMBRANE (Geneset_Overlap_Data Set 1) GO_MULTI_ORGANISM_METABOLIC_PROCESS	false	Geneset_Overlap	GO_ESTABLISHMENT_OF_PROTEIN_LOCALIZATION_TO_MEMBRANE (Geneset_Overlap_Data Set 1) GO_MULTI_ORGANISM_METABOLIC_PROCESS
RPS19|RPSA|RPS14|RPL22|RPS8|RPS2|RPL15|RPS6|RPS11|RPL31|RPS5|RPS4X|RPS29|RPS7|RPS3|RPL23|RPS18|RPL7|RPL10A|RPS9|RPS3A|RPL27|RPS25|RPS12|RPL6|RPL13A|RPL18|RPS16|RPL11|RPS13|RPL21|RPL19|RPLP0|RPLP2|RPL26|RPS17|RPS23|RPL12|RPS15A	39	0.6854545454545455	GO_ESTABLISHMENT_OF_PROTEIN_LOCALIZATION_TO_MEMBRANE (Geneset_Overlap_Data Set 1) GO_RNA_PROCESSING	false	Geneset_Overlap	GO_ESTABLISHMENT_OF_PROTEIN_LOCALIZATION_TO_MEMBRANE (Geneset_Overlap_Data Set 1) GO_RNA_PROCESSING
RPS19|RPSA|RPS14|RPL22|RPS8|RPS2|RPL15|RPS6|RPS11|RPL31|RAB11B|RPS5|RPS4X|TOMM22|RPS29|CDH2|RPS7|RPS3|RPL23|RPS18|RPL7|RPL10A|ANXA2|RPS9|VAMP2|RPS3A|NSF|SSR1|RPL27|RPS25|HSPA4|HSP90AA1|RPS12|RPL6|RPL13A|RPL18|RPS16|RPL11|RPS13|RPL21|RPL19|RPLP0|RPLP2|ATP1B1|RPL26|RPS17|RPS23|RPL12|RAB31|RPS15A	50	0.9545454545454546	GO_ESTABLISHMENT_OF_PROTEIN_LOCALIZATION_TO_MEMBRANE (Geneset_Overlap_Data Set 1) GO_PROTEIN_LOCALIZATION_TO_MEMBRANE	false	Geneset_Overlap	GO_ESTABLISHMENT_OF_PROTEIN_LOCALIZATION_TO_MEMBRANE (Geneset_Overlap_Data Set 1) GO_PROTEIN_LOCALIZATION_TO_MEMBRANE
RPS19|RPSA|RPS14|RPL22|RPS8|RPS2|RPL15|RPS6|RPS11|RPL31|RPS5|RPS4X|RPS29|RPS7|RPS3|RPL23|RPS18|RPL7|RPL10A|ANXA2|RPS9|RPS3A|SSR1|RPL27|RPS25|RPS12|RPL6|RPL13A|RPL18|RPS16|RPL11|RPS13|RPL21|RPL19|RPLP0|RPLP2|RPL26|RPS17|RPS23|RPL12|RPS15A	41	0.9099999999999999	GO_ESTABLISHMENT_OF_PROTEIN_LOCALIZATION_TO_MEMBRANE (Geneset_Overlap_Data Set 1) GO_PROTEIN_TARGETING_TO_MEMBRANE	false	Geneset_Overlap	GO_ESTABLISHMENT_OF_PROTEIN_LOCALIZATION_TO_MEMBRANE (Geneset_Overlap_Data Set 1) GO_PROTEIN_TARGETING_TO_MEMBRANE
RPS19|RPSA|RPS14|RPL22|RPS8|RPS2|RPL15|RPS6|RPS11|RPL31|RPS5|RPS4X|RPS29|RPS7|RPS3|RPL23|RPS18|RPL7|RPL10A|RPS9|RPS3A|RPL27|RPS25|RPS12|RPL6|RPL13A|RPL18|RPS16|RPL11|RPS13|RPL21|RPL19|RPLP0|RPLP2|RPL26|RPS17|RPS23|RPL12|RPS15A	39	0.89	GO_ESTABLISHMENT_OF_PROTEIN_LOCALIZATION_TO_MEMBRANE (Geneset_Overlap_Data Set 1) GO_ESTABLISHMENT_OF_PROTEIN_LOCALIZATION_TO_ENDOPLASMIC_RETICULUM	false	Geneset_Overlap	GO_ESTABLISHMENT_OF_PROTEIN_LOCALIZATION_TO_MEMBRANE (Geneset_Overlap_Data Set 1) GO_ESTABLISHMENT_OF_PROTEIN_LOCALIZATION_TO_ENDOPLASMIC_RETICULUM
RPS19|RPSA|RPS14|RPL22|RPS8|RPS2|RPL15|RPS6|RPS11|RPL31|RPS5|RPS4X|RPS29|RPS7|RPS3|RPL23|RPS18|RPL7|RPL10A|RPS9|RPS3A|RPL27|RPS25|RPS12|RPL6|RPL13A|RPL18|RPS16|RPL11|RPS13|RPL21|RPL19|RPLP0|RPLP2|RPL26|RPS17|RPS23|RPL12|RPS15A	39	0.6535135135135135	GO_ESTABLISHMENT_OF_PROTEIN_LOCALIZATION_TO_MEMBRANE (Geneset_Overlap_Data Set 1) GO_MACROMOLECULE_CATABOLIC_PROCESS	false	Geneset_Overlap	GO_ESTABLISHMENT_OF_PROTEIN_LOCALIZATION_TO_MEMBRANE (Geneset_Overlap_Data Set 1) GO_MACROMOLECULE_CATABOLIC_PROCESS
RPS19|RPSA|RPS14|RPL22|RPS8|RPS2|RPL15|RPS6|RPS11|RPL31|RPS5|RPS4X|RPS29|RPS7|RPS3|RPL23|RPS18|RPL7|RPL10A|RPS9|RPS3A|RPL27|RPS25|RPS12|RPL6|RPL13A|RPL18|RPS16|RPL11|RPS13|RPL21|RPL19|RPLP0|RPLP2|RPL26|RPS17|RPS23|RPL12|RPS15A	39	0.7045161290322581	GO_ESTABLISHMENT_OF_PROTEIN_LOCALIZATION_TO_MEMBRANE (Geneset_Overlap_Data Set 1) GO_AMIDE_BIOSYNTHETIC_PROCESS	false	Geneset_Overlap	GO_ESTABLISHMENT_OF_PROTEIN_LOCALIZATION_TO_MEMBRANE (Geneset_Overlap_Data Set 1) GO_AMIDE_BIOSYNTHETIC_PROCESS
RPS19|RPSA|RPS14|RPL22|RPS8|RPS2|RPL15|RPS6|RPS11|RPL31|RPS5|RPS4X|RPS29|RPS7|RPS3|RPL23|RPS18|RPL7|RPL10A|RPS9|RPS3A|RPL27|RPS25|RPS12|RPL6|RPL13A|RPL18|RPS16|RPL11|RPS13|RPL21|RPL19|RPLP0|RPLP2|RPL26|RPS17|RPS23|RPL12|RPS15A	39	0.8698529411764706	GO_ESTABLISHMENT_OF_PROTEIN_LOCALIZATION_TO_MEMBRANE (Geneset_Overlap_Data Set 1) GO_RIBOSOMAL_SUBUNIT	false	Geneset_Overlap	GO_ESTABLISHMENT_OF_PROTEIN_LOCALIZATION_TO_MEMBRANE (Geneset_Overlap_Data Set 1) GO_RIBOSOMAL_SUBUNIT
RPS19|RPSA|RPS14|RPL22|RPS8|RPS2|RPL15|RPS6|RPS11|RPL31|RPS5|RPS4X|TOMM22|RPS29|RPS7|RPS3|RPL23|RPS18|RPL7|RPL10A|RPS9|RPS3A|RPL27|RPS25|HSPA4|HSP90AA1|RPS12|RPL6|RPL13A|RPL18|RPS16|RPL11|RPS13|RPL21|RPL19|RPLP0|RPLP2|RPL26|RPS17|RPS23|RPL12|RPS15A	42	0.7587096774193548	GO_ESTABLISHMENT_OF_PROTEIN_LOCALIZATION_TO_MEMBRANE (Geneset_Overlap_Data Set 1) GO_PROTEIN_LOCALIZATION_TO_ORGANELLE	false	Geneset_Overlap	GO_ESTABLISHMENT_OF_PROTEIN_LOCALIZATION_TO_MEMBRANE (Geneset_Overlap_Data Set 1) GO_PROTEIN_LOCALIZATION_TO_ORGANELLE
RPS19|RPSA|RPS14|RPL22|RPS8|RPS2|RPL15|RPS6|RPS11|RPL31|RPS5|RPS4X|RPS29|RPS7|RPS3|RPL23|RPS18|RPL7|RPL10A|RPS9|RPS3A|RPL27|RPS25|RPS12|RPL6|RPL13A|RPL18|RPS16|RPL11|RPS13|RPL21|RPL19|RPLP0|RPLP2|RPL26|RPS17|RPS23|RPL12|RPS15A	39	0.7660183066361557	GO_ESTABLISHMENT_OF_PROTEIN_LOCALIZATION_TO_MEMBRANE (Geneset_Overlap_Data Set 1) GO_RIBONUCLEOPROTEIN_COMPLEX_BIOGENESIS	false	Geneset_Overlap	GO_ESTABLISHMENT_OF_PROTEIN_LOCALIZATION_TO_MEMBRANE (Geneset_Overlap_Data Set 1) GO_RIBONUCLEOPROTEIN_COMPLEX_BIOGENESIS
RPS19|RPSA|RPS14|RPL22|RPS8|RPS2|RPL15|RPS6|RPS11|RPL31|RPS5|RPS4X|RPS29|RPS7|RPS3|RPL23|RPS18|RPL7|RPL10A|RPS9|RPS3A|RPL27|RPS25|RPS12|RPL6|RPL13A|RPL18|RPS16|RPL11|RPS13|RPL21|RPL19|RPLP0|RPLP2|RPL26|RPS17|RPS23|RPL12|RPS15A	39	0.832210242587601	GO_ESTABLISHMENT_OF_PROTEIN_LOCALIZATION_TO_MEMBRANE (Geneset_Overlap_Data Set 1) GO_NCRNA_METABOLIC_PROCESS	false	Geneset_Overlap	GO_ESTABLISHMENT_OF_PROTEIN_LOCALIZATION_TO_MEMBRANE (Geneset_Overlap_Data Set 1) GO_NCRNA_METABOLIC_PROCESS
RPS19|RPSA|RPS14|RPL22|RPS8|RPS2|RPL15|RPS6|RPS11|RPL31|RPS5|RPS4X|TOMM22|RPS29|RPS7|RPS3|RPL23|RPS18|RPL7|RPL10A|ANXA2|RPS9|RPS3A|SSR1|RPL27|RPS25|HSPA4|HSP90AA1|RPS12|RPL6|RPL13A|RPL18|RPS16|RPL11|RPS13|RPL21|RPL19|RPLP0|RPLP2|RPL26|RPS17|RPS23|RPL12|RPS15A	44	0.800655737704918	GO_ESTABLISHMENT_OF_PROTEIN_LOCALIZATION_TO_MEMBRANE (Geneset_Overlap_Data Set 1) GO_PROTEIN_TARGETING	false	Geneset_Overlap	GO_ESTABLISHMENT_OF_PROTEIN_LOCALIZATION_TO_MEMBRANE (Geneset_Overlap_Data Set 1) GO_PROTEIN_TARGETING
RPS19|RPSA|RPS14|RPL22|RPS8|RPS2|RPL15|RPS6|RPS11|RPL31|RPS5|RPS4X|RPS29|RPS7|RPS3|RPL23|RPS18|RPL7|RPL10A|RPS9|RPS3A|RPL27|RPS25|RPS12|RPL6|RPL13A|RPL18|RPS16|RPL11|RPS13|RPL21|RPL19|RPLP0|RPLP2|RPL26|RPS17|RPS23|RPL12|RPS15A	39	0.6091011235955056	GO_ESTABLISHMENT_OF_PROTEIN_LOCALIZATION_TO_MEMBRANE (Geneset_Overlap_Data Set 1) GO_ORGANONITROGEN_COMPOUND_BIOSYNTHETIC_PROCESS	false	Geneset_Overlap	GO_ESTABLISHMENT_OF_PROTEIN_LOCALIZATION_TO_MEMBRANE (Geneset_Overlap_Data Set 1) GO_ORGANONITROGEN_COMPOUND_BIOSYNTHETIC_PROCESS
RPS19|RPSA|RPS14|RPL22|RPS8|RPS2|RPL15|RPS6|RPS11|RPL31|RPS5|RPS4X|RPS29|RPS7|RPS3|RPL23|RPS18|RPL7|RPL10A|RPS9|RPS3A|RPL27|RPS25|RPS12|RPL6|RPL13A|RPL18|RPS16|RPL11|RPS13|RPL21|RPL19|RPLP0|RPLP2|RPL26|RPS17|RPS23|RPL12|RPS15A	39	0.8698529411764706	GO_ESTABLISHMENT_OF_PROTEIN_LOCALIZATION_TO_MEMBRANE (Geneset_Overlap_Data Set 1) GO_NUCLEAR_TRANSCRIBED_MRNA_CATABOLIC_PROCESS_NONSENSE_MEDIATED_DECAY	false	Geneset_Overlap	GO_ESTABLISHMENT_OF_PROTEIN_LOCALIZATION_TO_MEMBRANE (Geneset_Overlap_Data Set 1) GO_NUCLEAR_TRANSCRIBED_MRNA_CATABOLIC_PROCESS_NONSENSE_MEDIATED_DECAY
RPS19|RPSA|RPS14|RPL22|RPS8|RPS2|RPL15|RPS6|RPS11|RPL31|RAB11B|RPS5|RPS4X|TOMM22|RPS29|RPS7|RPS3|RPL23|RPS18|RPL7|RPL10A|ANXA2|RPS9|VAMP2|RPS3A|NSF|SSR1|RPL27|RPS25|HSPA4|HSP90AA1|RPS12|RPL6|RPL13A|RPL18|RPS16|RPL11|RPS13|RPL21|RPL19|RPLP0|RPLP2|ATP1B1|RPL26|RPS17|RPS23|RPL12|RAB31|RPS15A	49	0.7851807228915663	GO_ESTABLISHMENT_OF_PROTEIN_LOCALIZATION_TO_MEMBRANE (Geneset_Overlap_Data Set 1) GO_INTRACELLULAR_PROTEIN_TRANSPORT	false	Geneset_Overlap	GO_ESTABLISHMENT_OF_PROTEIN_LOCALIZATION_TO_MEMBRANE (Geneset_Overlap_Data Set 1) GO_INTRACELLULAR_PROTEIN_TRANSPORT
RPS19|RPS14|RPS2|RPS6|RPS11|RPS7|RPS3|RPL23|RPL7|RPL10A|RPS9|RPS3A|RPS25|RPL13A|RPL18|RPL11|RPS13|RPL21|RPL19|RPS23|RPL12	21	0.4236425339366516	GO_ESTABLISHMENT_OF_PROTEIN_LOCALIZATION_TO_MEMBRANE (Geneset_Overlap_Data Set 1) GO_NUCLEOLUS	false	Geneset_Overlap	GO_ESTABLISHMENT_OF_PROTEIN_LOCALIZATION_TO_MEMBRANE (Geneset_Overlap_Data Set 1) GO_NUCLEOLUS
RPS19|RPSA|RPS14|RPL22|RPS8|RPS2|RPL15|RPS6|RPS11|RPL31|RPS5|RPS4X|RPS29|RPS7|RPS3|RPL23|RPS18|RPL7|RPL10A|RPS9|RPS3A|RPL27|RPS25|RPS12|RPL6|RPL13A|RPL18|RPS16|RPL11|RPS13|RPL21|RPL19|RPLP0|RPLP2|RPL26|RPS17|RPS23|RPL12|RPS15A	39	0.832210242587601	GO_ESTABLISHMENT_OF_PROTEIN_LOCALIZATION_TO_MEMBRANE (Geneset_Overlap_Data Set 1) GO_RNA_CATABOLIC_PROCESS	false	Geneset_Overlap	GO_ESTABLISHMENT_OF_PROTEIN_LOCALIZATION_TO_MEMBRANE (Geneset_Overlap_Data Set 1) GO_RNA_CATABOLIC_PROCESS
RPLP2|RPLP0|RPS17|RPL26|RPL23|RPL19|RPL21|RPS13|RPS3|RPS7|RPS29|RPL12|RPS15A|RPS9|RPL10A|RPS23|RPL7|RPS18|RPL22|RPS25|RPS2|RPL15|RPS12|RPS8|RPSA|RPS19|RPS3A|RPL27|RPS14|RPS5|RPS16|RPL11|RPS4X|RPL31|RPS11|RPS6|RPL13A|RPL6|RPL18	39	0.8881987577639752	GO_RIBOSOME (Geneset_Overlap_Data Set 1) GO_RNA_CATABOLIC_PROCESS	false	Geneset_Overlap	GO_RIBOSOME (Geneset_Overlap_Data Set 1) GO_RNA_CATABOLIC_PROCESS
RPLP2|RPLP0|RPS17|RPL26|RPL23|RPL19|RPL21|RPS13|RPS3|RPS7|RPS29|RPL12|RPS15A|RPS9|RPL10A|RPS23|RPL7|RPS18|RPL22|RPS25|RPS2|RPL15|RPS12|RPS8|RPSA|RPS19|RPS3A|RPL27|RPS14|RPS5|RPS16|RPL11|RPS4X|RPL31|RPS11|RPS6|RPL13A|RPL6|RPL18	39	0.7839968466692944	GO_RIBOSOME (Geneset_Overlap_Data Set 1) GO_PROTEIN_LOCALIZATION_TO_MEMBRANE	false	Geneset_Overlap	GO_RIBOSOME (Geneset_Overlap_Data Set 1) GO_PROTEIN_LOCALIZATION_TO_MEMBRANE
RPLP2|RPLP0|RPS17|RPL26|RPL23|RPL19|RPL21|RPS13|RPS3|RPS7|EEF2|RPS29|RPL12|RPS15A|RPS9|RPL10A|RPS23|RPL7|RPS18|RPL22|RPS25|RPS2|RPL15|RPS12|RPS8|RPSA|RPS19|RPS3A|RPL27|RPS14|RPS5|RPS16|RPL11|RPS4X|RPL31|RPS11|RPS6|RPL13A|RPL6|RPL18	40	0.7825765965300848	GO_RIBOSOME (Geneset_Overlap_Data Set 1) GO_CELLULAR_AMIDE_METABOLIC_PROCESS	false	Geneset_Overlap	GO_RIBOSOME (Geneset_Overlap_Data Set 1) GO_CELLULAR_AMIDE_METABOLIC_PROCESS
RPLP2|RPLP0|RPS17|RPL26|RPL23|RPL19|RPL21|RPS13|RPS3|RPS7|RPS29|RPL12|RPS15A|RPS9|RPL10A|RPS23|RPL7|RPS18|RPL22|RPS25|RPS2|RPL15|RPS12|RPS8|RPSA|RPS19|RPS3A|RPL27|RPS14|RPS5|RPS16|RPL11|RPS4X|RPL31|RPS11|RPS6|RPL13A|RPL6|RPL18|HBA1	40	0.8354866494401378	GO_RIBOSOME (Geneset_Overlap_Data Set 1) GO_CYTOSOLIC_PART	false	Geneset_Overlap	GO_RIBOSOME (Geneset_Overlap_Data Set 1) GO_CYTOSOLIC_PART
RPLP2|RPLP0|RPS17|RPL26|RPL23|RPL19|RPL21|RPS13|RPS3|RPS7|RPS29|RPL12|RPS15A|RPS9|RPL10A|RPS23|RPL7|RPS18|RPL22|RPS25|RPS2|RPL15|RPS12|RPS8|RPSA|RPS19|RPS3A|RPL27|RPS14|RPS5|RPS16|RPL11|RPS4X|RPL31|RPS11|RPS6|RPL13A|RPL6|RPL18	39	0.795593635250918	GO_RIBOSOME (Geneset_Overlap_Data Set 1) GO_MRNA_METABOLIC_PROCESS	false	Geneset_Overlap	GO_RIBOSOME (Geneset_Overlap_Data Set 1) GO_MRNA_METABOLIC_PROCESS
RPLP2|RPLP0|RPS17|RPL26|RPL23|RPL19|RPL21|RPS13|RPS3|RPS7|RPS29|RPL12|RPS15A|RPS9|RPL10A|RPS23|RPL7|RPS18|RPL22|RPS25|RPS2|RPL15|RPS12|RPS8|RPSA|RPS19|RPS3A|RPL27|RPS14|RPS5|RPS16|RPL11|RPS4X|RPL31|RPS11|RPS6|RPL13A|RPL6|RPL18	39	0.9306818181818182	GO_RIBOSOME (Geneset_Overlap_Data Set 1) GO_NUCLEAR_TRANSCRIBED_MRNA_CATABOLIC_PROCESS_NONSENSE_MEDIATED_DECAY	false	Geneset_Overlap	GO_RIBOSOME (Geneset_Overlap_Data Set 1) GO_NUCLEAR_TRANSCRIBED_MRNA_CATABOLIC_PROCESS_NONSENSE_MEDIATED_DECAY
RPLP2|RPLP0|RPS17|RPL26|RPL23|RPL19|RPL21|RPS13|RPS3|RPS7|RPS29|RPL12|RPS15A|RPS9|RPL10A|RPS23|RPL7|RPS18|RPL22|RPS25|RPS2|RPL15|RPS12|RPS8|RPSA|RPS19|RPS3A|RPL27|RPS14|RPS5|RPS16|RPL11|RPS4X|RPL31|RPS11|RPS6|RPL13A|RPL6|RPL18	39	0.677626303127506	GO_RIBOSOME (Geneset_Overlap_Data Set 1) GO_INTERSPECIES_INTERACTION_BETWEEN_ORGANISMS	false	Geneset_Overlap	GO_RIBOSOME (Geneset_Overlap_Data Set 1) GO_INTERSPECIES_INTERACTION_BETWEEN_ORGANISMS
RPLP2|RPLP0|RPS17|RPL26|RPL23|RPL19|RPL21|RPS13|RPS3|RPS7|RPS29|RPL12|RPS15A|RPS9|RPL10A|RPS23|RPL7|RPS18|RPL22|RPS25|RPS2|RPL15|RPS12|RPS8|RPSA|RPS19|RPS3A|RPL27|RPS14|RPS5|RPS16|RPL11|RPS4X|RPL31|RPS11|RPS6|RPL13A|RPL6|RPL18	39	0.7445331482124262	GO_RIBOSOME (Geneset_Overlap_Data Set 1) GO_MACROMOLECULE_CATABOLIC_PROCESS	false	Geneset_Overlap	GO_RIBOSOME (Geneset_Overlap_Data Set 1) GO_MACROMOLECULE_CATABOLIC_PROCESS
RPLP2|RPLP0|RPS17|RPL26|RPL23|RPL19|RPL21|RPS13|RPS3|RPS7|RPS29|RPL12|RPS15A|RPS9|RPL10A|RPS23|RPL7|RPS18|RPL22|RPS25|RPS2|RPL15|RPS12|RPS8|RPSA|RPS19|RPS3A|RPL27|RPS14|RPS5|RPS16|RPL11|RPS4X|RPL31|RPS11|RPS6|RPL13A|RPL6|RPL18	39	0.9089430894308943	GO_RIBOSOME (Geneset_Overlap_Data Set 1) GO_PROTEIN_TARGETING_TO_MEMBRANE	false	Geneset_Overlap	GO_RIBOSOME (Geneset_Overlap_Data Set 1) GO_PROTEIN_TARGETING_TO_MEMBRANE
RPLP2|RPLP0|RPS17|RPL26|RPL23|RPL19|RPL21|RPS13|RPS3|RPS7|EEF2|RPS29|RPL12|RPS15A|RPS9|RPL10A|RPS23|RPL7|RPS18|RPL22|RPS25|RPS2|RPL15|RPS12|RPS8|RPSA|RPS19|RPS3A|RPL27|RPS14|RPS5|RPS16|RPL11|RPS4X|RPL31|RPS11|RPS6|RPL13A|RPL6|RPL18	40	0.8354866494401378	GO_RIBOSOME (Geneset_Overlap_Data Set 1) GO_AMIDE_BIOSYNTHETIC_PROCESS	false	Geneset_Overlap	GO_RIBOSOME (Geneset_Overlap_Data Set 1) GO_AMIDE_BIOSYNTHETIC_PROCESS
RPLP2|RPLP0|RPS17|RPL26|RPL23|RPL19|RPL21|RPS13|RPS3|RPS7|RPS29|RPL12|RPS15A|RPS9|RPL10A|RPS23|RPL7|RPS18|RPL22|RPS25|RPS2|RPL15|RPS12|RPS8|RPSA|RPS19|RPS3A|RPL27|RPS14|RPS5|RPS16|RPL11|RPS4X|RPL31|RPS11|RPS6|RPL13A|RPL6|RPL18	39	0.6802325581395349	GO_RIBOSOME (Geneset_Overlap_Data Set 1) GO_INTRACELLULAR_PROTEIN_TRANSPORT	false	Geneset_Overlap	GO_RIBOSOME (Geneset_Overlap_Data Set 1) GO_INTRACELLULAR_PROTEIN_TRANSPORT
RPLP2|RPLP0|RPS17|RPL26|RPL23|RPL19|RPL21|RPS13|RPS3|RPS7|RPS29|RPL12|RPS15A|RPS9|RPL10A|RPS23|RPL7|RPS18|RPL22|RPS25|RPS2|RPL15|RPS12|RPS8|RPSA|RPS19|RPS3A|RPL27|RPS14|RPS5|RPS16|RPL11|RPS4X|RPL31|RPS11|RPS6|RPL13A|RPL6|RPL18	39	0.8145994832041343	GO_RIBOSOME (Geneset_Overlap_Data Set 1) GO_ESTABLISHMENT_OF_PROTEIN_LOCALIZATION_TO_MEMBRANE	false	Geneset_Overlap	GO_RIBOSOME (Geneset_Overlap_Data Set 1) GO_ESTABLISHMENT_OF_PROTEIN_LOCALIZATION_TO_MEMBRANE
RPLP2|RPLP0|RPS17|RPL26|RPL23|RPL19|RPL21|RPS13|RPS3|RPS7|RPS29|RPL12|RPS15A|RPS9|RPL10A|RPS23|RPL7|RPS18|RPL22|RPS25|RPS2|RPL15|RPS12|RPS8|RPSA|RPS19|RPS3A|RPL27|RPS14|RPS5|RPS16|RPL11|RPS4X|RPL31|RPS11|RPS6|RPL13A|RPL6|RPL18	39	0.7839968466692944	GO_RIBOSOME (Geneset_Overlap_Data Set 1) GO_RNA_PROCESSING	false	Geneset_Overlap	GO_RIBOSOME (Geneset_Overlap_Data Set 1) GO_RNA_PROCESSING
RPL23|RPL19|RPL21|RPS13|RPS3|RPS7|RPL12|RPS9|RPL10A|RPS23|RPL7|RPS25|RPS2|RPS19|RPS3A|RPS14|RPL11|RPS11|RPS6|RPL13A|RPL18	21	0.44136191677175285	GO_RIBOSOME (Geneset_Overlap_Data Set 1) GO_NUCLEOLUS	false	Geneset_Overlap	GO_RIBOSOME (Geneset_Overlap_Data Set 1) GO_NUCLEOLUS
RPLP2|RPLP0|RPS17|RPL26|RPL23|RPL19|RPL21|RPS13|RPS3|RPS7|RPS29|RPL12|RPS15A|RPS9|RPL10A|RPS23|RPL7|RPS18|RPL22|RPS25|RPS2|RPL15|RPS12|RPS8|RPSA|RPS19|RPS3A|RPL27|RPS14|RPS5|RPS16|RPL11|RPS4X|RPL31|RPS11|RPS6|RPL13A|RPL6|RPL18	39	0.7839968466692944	GO_RIBOSOME (Geneset_Overlap_Data Set 1) GO_PROTEIN_TARGETING	false	Geneset_Overlap	GO_RIBOSOME (Geneset_Overlap_Data Set 1) GO_PROTEIN_TARGETING
RPLP2|RPLP0|RPS17|RPL26|RPL23|RPL19|RPL21|RPS13|RPS3|RPS7|RPS29|RPL12|RPS15A|RPS9|RPL10A|RPS23|RPL7|RPS18|RPL22|RPS25|RPS2|RPL15|RPS12|RPS8|RPSA|RPS19|RPS3A|RPL27|RPS14|RPS5|RPS16|RPL11|RPS4X|RPL31|RPS11|RPS6|RPL13A|RPL6|RPL18	39	0.9534883720930232	GO_RIBOSOME (Geneset_Overlap_Data Set 1) GO_ESTABLISHMENT_OF_PROTEIN_LOCALIZATION_TO_ENDOPLASMIC_RETICULUM	false	Geneset_Overlap	GO_RIBOSOME (Geneset_Overlap_Data Set 1) GO_ESTABLISHMENT_OF_PROTEIN_LOCALIZATION_TO_ENDOPLASMIC_RETICULUM
RPLP2|RPLP0|RPS17|RPL26|RPL23|RPL19|RPL21|RPS13|RPS3|RPS7|RPS29|RPL12|RPS15A|RPS9|RPL10A|RPS23|RPL7|RPS18|RPL22|RPS25|RPS2|RPL15|RPS12|RPS8|RPSA|RPS19|RPS3A|RPL27|RPS14|RPS5|RPS16|RPL11|RPS4X|RPL31|RPS11|RPS6|RPL13A|RPL6|RPL18	39	0.8434883720930233	GO_RIBOSOME (Geneset_Overlap_Data Set 1) GO_RIBONUCLEOPROTEIN_COMPLEX_BIOGENESIS	false	Geneset_Overlap	GO_RIBOSOME (Geneset_Overlap_Data Set 1) GO_RIBONUCLEOPROTEIN_COMPLEX_BIOGENESIS
RPLP2|RPLP0|RPS17|RPL26|RPL23|RPL19|RPL21|RPS13|RPS3|RPS7|EEF2|RPS29|RPL12|RPS15A|RPS9|RPL10A|RPS23|RPL7|RPS18|RPL22|RPS25|RPS2|RPL15|RPS12|RPS8|RPSA|RPS19|RPS3A|RPL27|RPS14|RPS5|RPS16|RPL11|RPS4X|RPL31|RPS11|RPS6|RPL13A|RPL6|RPL18	40	0.804099329917225	GO_RIBOSOME (Geneset_Overlap_Data Set 1) GO_PEPTIDE_METABOLIC_PROCESS	false	Geneset_Overlap	GO_RIBOSOME (Geneset_Overlap_Data Set 1) GO_PEPTIDE_METABOLIC_PROCESS
RPLP2|RPLP0|RPS17|RPL26|RPL23|RPL19|RPL21|RPS13|RPS3|RPS7|RPS29|RPL12|RPS15A|RPS9|RPL10A|RPS23|RPL7|RPS18|RPL22|RPS2|RPL15|RPS12|RPS8|RPSA|RPS19|RPS3A|RPL27|RPS14|RPS5|RPS16|RPL11|RPS4X|RPL31|RPS11|RPS6|RPL13A|RPL6|RPL18	38	0.876458112407211	GO_RIBOSOME (Geneset_Overlap_Data Set 1) GO_STRUCTURAL_CONSTITUENT_OF_RIBOSOME	false	Geneset_Overlap	GO_RIBOSOME (Geneset_Overlap_Data Set 1) GO_STRUCTURAL_CONSTITUENT_OF_RIBOSOME
RPLP2|RPLP0|RPS17|RPL26|RPL23|RPL19|RPL21|RPS13|RPS3|RPS7|RPS29|RPL12|RPS15A|RPS9|RPL10A|RPS23|RPL7|RPS18|RPL22|RPS25|RPS2|RPL15|RPS12|RPS8|RPSA|RPS19|RPS3A|RPL27|RPS14|RPS5|RPS16|RPL11|RPS4X|RPL31|RPS11|RPS6|RPL13A|RPL6|RPL18|HBA1	40	0.9651162790697674	GO_RIBOSOME (Geneset_Overlap_Data Set 1) GO_RIBOSOMAL_SUBUNIT	false	Geneset_Overlap	GO_RIBOSOME (Geneset_Overlap_Data Set 1) GO_RIBOSOMAL_SUBUNIT
RPLP2|RPLP0|RPS17|RPL26|RPL23|RPL19|RPL21|RPS13|RPS3|RPS7|EEF2|RPS29|RPL12|RPS15A|RPS9|SNCA|RPL10A|RPS23|RPL7|RPS18|RPL22|RPS25|RPS2|RPL15|RPS12|RPS8|RPSA|RPS19|RPS3A|RPL27|RPS14|RPS5|RPS16|RPL11|RPS4X|RPL31|RPS11|RPS6|RPL13A|RPL6|RPL18	41	0.7329941860465117	GO_RIBOSOME (Geneset_Overlap_Data Set 1) GO_ORGANONITROGEN_COMPOUND_BIOSYNTHETIC_PROCESS	false	Geneset_Overlap	GO_RIBOSOME (Geneset_Overlap_Data Set 1) GO_ORGANONITROGEN_COMPOUND_BIOSYNTHETIC_PROCESS
RPLP2|RPLP0|RPL26|RPL23|RPL19|RPL21|RPL12|RPL10A|RPL7|RPL22|RPL15|RPL27|RPL11|RPL31|RPL13A|RPL6|RPL18	17	0.6976744186046512	GO_RIBOSOME (Geneset_Overlap_Data Set 1) GO_LARGE_RIBOSOMAL_SUBUNIT	false	Geneset_Overlap	GO_RIBOSOME (Geneset_Overlap_Data Set 1) GO_LARGE_RIBOSOMAL_SUBUNIT
RPLP2|RPLP0|RPS17|RPL26|RPL23|RPL19|RPL21|RPS13|RPS3|RPS7|RPS29|RPL12|RPS15A|RPS9|RPL10A|RPS23|RPL7|RPS18|RPL22|RPS25|RPS2|RPL15|RPS12|RPS8|RPSA|RPS19|RPS3A|RPL27|RPS14|RPS5|RPS16|RPL11|RPS4X|RPL31|RPS11|RPS6|RPL13A|RPL6|RPL18	39	0.9306818181818182	GO_RIBOSOME (Geneset_Overlap_Data Set 1) GO_MULTI_ORGANISM_METABOLIC_PROCESS	false	Geneset_Overlap	GO_RIBOSOME (Geneset_Overlap_Data Set 1) GO_MULTI_ORGANISM_METABOLIC_PROCESS
RPLP2|RPLP0|RPS17|RPL26|RPL23|RPL19|RPL21|RPS13|RPS3|RPS7|RPS29|RPL12|RPS15A|RPS9|RPL10A|RPS23|RPL7|RPS18|RPL22|RPS25|RPS2|RPL15|RPS12|RPS8|RPSA|RPS19|RPS3A|RPL27|RPS14|RPS5|RPS16|RPL11|RPS4X|RPL31|RPS11|RPS6|RPL13A|RPL6|RPL18	39	0.8881987577639752	GO_RIBOSOME (Geneset_Overlap_Data Set 1) GO_NCRNA_METABOLIC_PROCESS	false	Geneset_Overlap	GO_RIBOSOME (Geneset_Overlap_Data Set 1) GO_NCRNA_METABOLIC_PROCESS
RPS23|RPL12|RPS15A|RPL19|RPS13|RPL21|RPLP2|RPLP0|RPS17|RPL26|RPL13A|RPL6|RPL18|RPS16|RPL11|RPS3A|RPL27|RPS25|RPS12|RPS18|RPL7|RPL10A|RPS9|RPS3|RPS7|RPS29|RPL23|RPS6|RPS11|RPL31|RPS5|RPS4X|RPS19|RPSA|RPS14|RPL22|RPS2|RPL15|RPS8	39	0.7050215208034433	GO_NCRNA_PROCESSING (Geneset_Overlap_Data Set 1) GO_INTERSPECIES_INTERACTION_BETWEEN_ORGANISMS	false	Geneset_Overlap	GO_NCRNA_PROCESSING (Geneset_Overlap_Data Set 1) GO_INTERSPECIES_INTERACTION_BETWEEN_ORGANISMS
RPS23|RPL12|RPS15A|RPL19|RPS13|RPL21|RPLP2|RPLP0|RPS17|RPL26|RPL13A|RPL6|RPL18|RPS16|RPL11|RPS3A|RPL27|RPS25|RPS12|RPS18|RPL7|RPL10A|RPS9|RPS3|RPS7|RPS29|RPL23|RPS6|RPS11|RPL31|RPS5|RPS4X|RPS19|RPSA|RPS14|RPL22|RPS2|RPL15|RPS8	39	0.975609756097561	GO_NCRNA_PROCESSING (Geneset_Overlap_Data Set 1) GO_ESTABLISHMENT_OF_PROTEIN_LOCALIZATION_TO_ENDOPLASMIC_RETICULUM	false	Geneset_Overlap	GO_NCRNA_PROCESSING (Geneset_Overlap_Data Set 1) GO_ESTABLISHMENT_OF_PROTEIN_LOCALIZATION_TO_ENDOPLASMIC_RETICULUM
RPS23|RPL12|RPS15A|RPL19|RPS13|RPL21|RPLP2|RPLP0|RPS17|RPL26|RPL13A|RPL6|RPL18|RPS16|RPL11|RPS3A|RPL27|RPS12|RPS18|RPL7|RPL10A|RPS9|RPS3|RPS7|RPS29|RPL23|RPS6|RPS11|RPL31|RPS5|RPS4X|RPS19|RPSA|RPS14|RPL22|RPS2|RPL15|RPS8	38	0.8952328159645233	GO_NCRNA_PROCESSING (Geneset_Overlap_Data Set 1) GO_STRUCTURAL_CONSTITUENT_OF_RIBOSOME	false	Geneset_Overlap	GO_NCRNA_PROCESSING (Geneset_Overlap_Data Set 1) GO_STRUCTURAL_CONSTITUENT_OF_RIBOSOME
RPS23|RPL12|RPS15A|RPL19|RPS13|RPL21|RPLP2|RPLP0|RPS17|RPL26|RPL13A|RPL6|RPL18|RPS16|RPL11|RPS3A|RPL27|RPS25|RPS12|RPS18|RPL7|RPL10A|RPS9|RPS3|RPS7|RPS29|RPL23|RPS6|RPS11|RPL31|RPS5|RPS4X|RPS19|RPSA|RPS14|RPL22|RPS2|RPL15|RPS8	39	0.9290981281905841	GO_NCRNA_PROCESSING (Geneset_Overlap_Data Set 1) GO_PROTEIN_TARGETING_TO_MEMBRANE	false	Geneset_Overlap	GO_NCRNA_PROCESSING (Geneset_Overlap_Data Set 1) GO_PROTEIN_TARGETING_TO_MEMBRANE
RPS23|RPL12|RPS15A|RPL19|RPS13|RPL21|RPLP2|RPLP0|RPS17|RPL26|RPL13A|RPL6|RPL18|RPS16|RPL11|RPS3A|RPL27|RPS25|RPS12|RPS18|RPL7|RPL10A|RPS9|RPS3|RPS7|RPS29|RPL23|RPS6|RPS11|RPL31|RPS5|RPS4X|RPS19|RPSA|RPS14|RPL22|RPS2|RPL15|RPS8	39	0.8177150192554556	GO_NCRNA_PROCESSING (Geneset_Overlap_Data Set 1) GO_PROTEIN_TARGETING	false	Geneset_Overlap	GO_NCRNA_PROCESSING (Geneset_Overlap_Data Set 1) GO_PROTEIN_TARGETING
RPS23|RPL12|RPS15A|RPL19|RPS13|RPL21|RPLP2|RPLP0|RPS17|RPL26|RPL13A|RPL6|RPL18|RPS16|RPL11|RPS3A|RPL27|RPS25|RPS12|RPS18|RPL7|RPL10A|RPS9|RPS3|RPS7|RPS29|RPL23|RPS6|RPS11|RPL31|RPS5|RPS4X|RPS19|RPSA|RPS14|RPL22|RPS2|RPL15|RPS8	39	0.719359756097561	GO_NCRNA_PROCESSING (Geneset_Overlap_Data Set 1) GO_ORGANONITROGEN_COMPOUND_BIOSYNTHETIC_PROCESS	false	Geneset_Overlap	GO_NCRNA_PROCESSING (Geneset_Overlap_Data Set 1) GO_ORGANONITROGEN_COMPOUND_BIOSYNTHETIC_PROCESS
RPL12|RPL19|RPL21|RPLP2|RPLP0|RPL26|RPL13A|RPL6|RPL18|RPL11|RPL27|RPL7|RPL10A|RPL23|RPL31|RPL22|RPL15	17	0.7073170731707317	GO_NCRNA_PROCESSING (Geneset_Overlap_Data Set 1) GO_LARGE_RIBOSOMAL_SUBUNIT	false	Geneset_Overlap	GO_NCRNA_PROCESSING (Geneset_Overlap_Data Set 1) GO_LARGE_RIBOSOMAL_SUBUNIT
RPS23|RPL12|RPS15A|RPL19|RPS13|RPL21|RPLP2|RPLP0|RPS17|RPL26|RPL13A|RPL6|RPL18|RPS16|RPL11|RPS3A|RPL27|RPS25|RPS12|RPS18|RPL7|RPL10A|RPS9|RPS3|RPS7|RPS29|HNRNPA2B1|HSD17B10|RPL23|RPS6|RPS11|RPL31|RPS5|RPS4X|RPS19|RPSA|RPS14|RPL22|RPS2|RPL15|RPS8	41	0.8727272727272728	GO_NCRNA_PROCESSING (Geneset_Overlap_Data Set 1) GO_RNA_PROCESSING	false	Geneset_Overlap	GO_NCRNA_PROCESSING (Geneset_Overlap_Data Set 1) GO_RNA_PROCESSING
RPS23|RPL12|RPS15A|RPL19|RPS13|RPL21|RPLP2|RPLP0|RPS17|RPL26|RPL13A|RPL6|RPL18|RPS16|RPL11|RPS3A|RPL27|RPS25|RPS12|RPS18|RPL7|RPL10A|RPS9|RPS3|RPS7|RPS29|RPL23|RPS6|RPS11|RPL31|RPS5|RPS4X|RPS19|RPSA|RPS14|RPL22|RPS2|RPL15|RPS8	39	0.9517857142857142	GO_NCRNA_PROCESSING (Geneset_Overlap_Data Set 1) GO_MULTI_ORGANISM_METABOLIC_PROCESS	false	Geneset_Overlap	GO_NCRNA_PROCESSING (Geneset_Overlap_Data Set 1) GO_MULTI_ORGANISM_METABOLIC_PROCESS
RPS23|RPL12|RPS15A|RPL19|RPS13|RPL21|RPLP2|RPLP0|RPS17|RPL26|RPL13A|RPL6|RPL18|RPS16|RPL11|RPS3A|RPL27|RPS25|RPS12|RPS18|RPL7|RPL10A|RPS9|RPS3|RPS7|RPS29|RPL23|RPS6|RPS11|RPL31|RPS5|RPS4X|RPS19|RPSA|RPS14|RPL22|RPS2|RPL15|RPS8	39	0.8177150192554556	GO_NCRNA_PROCESSING (Geneset_Overlap_Data Set 1) GO_PROTEIN_LOCALIZATION_TO_MEMBRANE	false	Geneset_Overlap	GO_NCRNA_PROCESSING (Geneset_Overlap_Data Set 1) GO_PROTEIN_LOCALIZATION_TO_MEMBRANE
RPS23|RPL12|RPS15A|RPL19|RPS13|RPL21|RPLP2|RPLP0|RPS17|RPL26|RPL13A|RPL6|RPL18|RPS16|RPL11|RPS3A|RPL27|RPS25|RPS12|RPS18|RPL7|RPL10A|RPS9|RPS3|RPS7|RPS29|HNRNPA2B1|RPL23|RPS6|RPS11|RPL31|RPS5|RPS4X|RPS19|RPSA|RPS14|RPL22|RPS2|RPL15|RPS8	40	0.8581752484191508	GO_NCRNA_PROCESSING (Geneset_Overlap_Data Set 1) GO_MRNA_METABOLIC_PROCESS	false	Geneset_Overlap	GO_NCRNA_PROCESSING (Geneset_Overlap_Data Set 1) GO_MRNA_METABOLIC_PROCESS
RPS23|RPL12|RPS15A|RPL19|RPS13|RPL21|RPLP2|RPLP0|RPS17|RPL26|RPL13A|RPL6|RPL18|RPS16|RPL11|RPS3A|RPL27|RPS25|RPS12|RPS18|RPL7|RPL10A|RPS9|RPS3|RPS7|RPS29|RPL23|RPS6|RPS11|RPL31|RPS5|RPS4X|RPS19|RPSA|RPS14|RPL22|RPS2|RPL15|RPS8	39	0.775609756097561	GO_NCRNA_PROCESSING (Geneset_Overlap_Data Set 1) GO_MACROMOLECULE_CATABOLIC_PROCESS	false	Geneset_Overlap	GO_NCRNA_PROCESSING (Geneset_Overlap_Data Set 1) GO_MACROMOLECULE_CATABOLIC_PROCESS
RPS23|RPL12|RPS15A|RPL19|RPS13|RPL21|RPLP2|RPLP0|RPS17|RPL26|RPL13A|RPL6|RPL18|RPS16|RPL11|RPS3A|RPL27|RPS25|RPS12|RPS18|RPL7|RPL10A|RPS9|RPS3|RPS7|RPS29|RPL23|RPS6|RPS11|RPL31|RPS5|RPS4X|RPS19|RPSA|RPS14|RPL22|RPS2|RPL15|RPS8	39	0.9089430894308943	GO_NCRNA_PROCESSING (Geneset_Overlap_Data Set 1) GO_RIBOSOME	false	Geneset_Overlap	GO_NCRNA_PROCESSING (Geneset_Overlap_Data Set 1) GO_RIBOSOME
RPS23|RPL12|RPS15A|RPL19|RPS13|RPL21|RPLP2|RPLP0|RPS17|RPL26|RPL13A|RPL6|RPL18|RPS16|RPL11|RPS3A|RPL27|RPS25|RPS12|RPS18|RPL7|RPL10A|RPS9|RPS3|RPS7|RPS29|RPL23|RPS6|RPS11|RPL31|RPS5|RPS4X|RPS19|RPSA|RPS14|RPL22|RPS2|RPL15|RPS8	39	0.881859756097561	GO_NCRNA_PROCESSING (Geneset_Overlap_Data Set 1) GO_RIBONUCLEOPROTEIN_COMPLEX_BIOGENESIS	false	Geneset_Overlap	GO_NCRNA_PROCESSING (Geneset_Overlap_Data Set 1) GO_RIBONUCLEOPROTEIN_COMPLEX_BIOGENESIS
RPS23|RPL12|RPS15A|RPL19|RPS13|RPL21|RPLP2|RPLP0|RPS17|RPL26|RPL13A|RPL6|RPL18|RPS16|RPL11|RPS3A|RPL27|RPS25|RPS12|RPS18|RPL7|RPL10A|RPS9|RPS3|RPS7|RPS29|RPL23|RPS6|RPS11|RPL31|RPS5|RPS4X|RPS19|RPSA|RPS14|RPL22|RPS2|RPL15|RPS8	39	0.8435342843994478	GO_NCRNA_PROCESSING (Geneset_Overlap_Data Set 1) GO_AMIDE_BIOSYNTHETIC_PROCESS	false	Geneset_Overlap	GO_NCRNA_PROCESSING (Geneset_Overlap_Data Set 1) GO_AMIDE_BIOSYNTHETIC_PROCESS
RPS23|RPL12|RPS15A|RPL19|RPS13|RPL21|RPLP2|RPLP0|RPS17|RPL26|RPL13A|RPL6|RPL18|RPS16|RPL11|RPS3A|RPL27|RPS25|RPS12|RPS18|RPL7|RPL10A|RPS9|RPS3|RPS7|RPS29|RPL23|RPS6|RPS11|RPL31|RPS5|RPS4X|RPS19|RPSA|RPS14|RPL22|RPS2|RPL15|RPS8	39	0.9517857142857142	GO_NCRNA_PROCESSING (Geneset_Overlap_Data Set 1) GO_RIBOSOMAL_SUBUNIT	false	Geneset_Overlap	GO_NCRNA_PROCESSING (Geneset_Overlap_Data Set 1) GO_RIBOSOMAL_SUBUNIT
RPS23|RPL12|RPS15A|RPL19|RPS13|RPL21|RPLP2|RPLP0|RPS17|RPL26|RPL13A|RPL6|RPL18|RPS16|RPL11|RPS3A|RPL27|RPS25|RPS12|RPS18|RPL7|RPL10A|RPS9|RPS3|RPS7|RPS29|HNRNPA2B1|HSD17B10|RPL23|RPS6|RPS11|RPL31|RPS5|RPS4X|RPS19|RPSA|RPS14|RPL22|RPS2|RPL15|RPS8	41	0.9880952380952381	GO_NCRNA_PROCESSING (Geneset_Overlap_Data Set 1) GO_NCRNA_METABOLIC_PROCESS	false	Geneset_Overlap	GO_NCRNA_PROCESSING (Geneset_Overlap_Data Set 1) GO_NCRNA_METABOLIC_PROCESS
RPS23|RPL12|RPS15A|RPL19|RPS13|RPL21|RPLP2|RPLP0|RPS17|RPL26|RPL13A|RPL6|RPL18|RPS16|RPL11|RPS3A|RPL27|RPS25|RPS12|RPS18|RPL7|RPL10A|RPS9|RPS3|RPS7|RPS29|RPL23|RPS6|RPS11|RPL31|RPS5|RPS4X|RPS19|RPSA|RPS14|RPL22|RPS2|RPL15|RPS8	39	0.850609756097561	GO_NCRNA_PROCESSING (Geneset_Overlap_Data Set 1) GO_ESTABLISHMENT_OF_PROTEIN_LOCALIZATION_TO_MEMBRANE	false	Geneset_Overlap	GO_NCRNA_PROCESSING (Geneset_Overlap_Data Set 1) GO_ESTABLISHMENT_OF_PROTEIN_LOCALIZATION_TO_MEMBRANE
RPS23|RPL12|RPS15A|RPL19|RPS13|RPL21|RPLP2|RPLP0|RPS17|RPL26|RPL13A|RPL6|RPL18|RPS16|RPL11|RPS3A|RPL27|RPS25|RPS12|RPS18|RPL7|RPL10A|RPS9|RPS3|RPS7|RPS29|RPL23|RPS6|RPS11|RPL31|RPS5|RPS4X|RPS19|RPSA|RPS14|RPL22|RPS2|RPL15|RPS8	39	0.9187915742793791	GO_NCRNA_PROCESSING (Geneset_Overlap_Data Set 1) GO_RNA_CATABOLIC_PROCESS	false	Geneset_Overlap	GO_NCRNA_PROCESSING (Geneset_Overlap_Data Set 1) GO_RNA_CATABOLIC_PROCESS
RPS23|RPL12|RPS15A|RPL19|RPS13|RPL21|RPLP2|RPLP0|RPS17|RPL26|RPL13A|RPL6|RPL18|RPS16|RPL11|RPS3A|RPL27|RPS25|RPS12|RPS18|RPL7|RPL10A|RPS9|RPS3|RPS7|RPS29|RPL23|RPS6|RPS11|RPL31|RPS5|RPS4X|RPS19|RPSA|RPS14|RPL22|RPS2|RPL15|RPS8	39	0.7077526132404182	GO_NCRNA_PROCESSING (Geneset_Overlap_Data Set 1) GO_INTRACELLULAR_PROTEIN_TRANSPORT	false	Geneset_Overlap	GO_NCRNA_PROCESSING (Geneset_Overlap_Data Set 1) GO_INTRACELLULAR_PROTEIN_TRANSPORT
RPS23|RPL12|RPS15A|RPL19|RPS13|RPL21|RPLP2|RPLP0|RPS17|RPL26|RPL13A|RPL6|RPL18|RPS16|RPL11|RPS3A|RPL27|RPS25|RPS12|RPS18|RPL7|RPL10A|RPS9|RPS3|RPS7|RPS29|RPL23|RPS6|RPS11|RPL31|RPS5|RPS4X|RPS19|RPSA|RPS14|RPL22|RPS2|RPL15|RPS8	39	0.790125885129819	GO_NCRNA_PROCESSING (Geneset_Overlap_Data Set 1) GO_CELLULAR_AMIDE_METABOLIC_PROCESS	false	Geneset_Overlap	GO_NCRNA_PROCESSING (Geneset_Overlap_Data Set 1) GO_CELLULAR_AMIDE_METABOLIC_PROCESS
RPS23|RPL12|RPS15A|RPL19|RPS13|RPL21|RPLP2|RPLP0|RPS17|RPL26|RPL13A|RPL6|RPL18|RPS16|RPL11|RPS3A|RPL27|RPS25|RPS12|RPS18|RPL7|RPL10A|RPS9|RPS3|RPS7|RPS29|RPL23|RPS6|RPS11|RPL31|RPS5|RPS4X|RPS19|RPSA|RPS14|RPL22|RPS2|RPL15|RPS8	39	0.8435342843994478	GO_NCRNA_PROCESSING (Geneset_Overlap_Data Set 1) GO_CYTOSOLIC_PART	false	Geneset_Overlap	GO_NCRNA_PROCESSING (Geneset_Overlap_Data Set 1) GO_CYTOSOLIC_PART
RPS23|RPL12|RPS15A|RPL19|RPS13|RPL21|RPLP2|RPLP0|RPS17|RPL26|RPL13A|RPL6|RPL18|RPS16|RPL11|RPS3A|RPL27|RPS25|RPS12|RPS18|RPL7|RPL10A|RPS9|RPS3|RPS7|RPS29|RPL23|RPS6|RPS11|RPL31|RPS5|RPS4X|RPS19|RPSA|RPS14|RPL22|RPS2|RPL15|RPS8	39	0.9517857142857142	GO_NCRNA_PROCESSING (Geneset_Overlap_Data Set 1) GO_NUCLEAR_TRANSCRIBED_MRNA_CATABOLIC_PROCESS_NONSENSE_MEDIATED_DECAY	false	Geneset_Overlap	GO_NCRNA_PROCESSING (Geneset_Overlap_Data Set 1) GO_NUCLEAR_TRANSCRIBED_MRNA_CATABOLIC_PROCESS_NONSENSE_MEDIATED_DECAY
RPS23|RPL12|RPL19|RPS13|RPL21|RPL13A|RPL18|RPL11|RPS3A|RPS25|RPL7|RPL10A|RPS9|RPS3|RPS7|RPL23|RPS6|RPS11|RPS19|RPS14|RPS2	21	0.4471968709256845	GO_NCRNA_PROCESSING (Geneset_Overlap_Data Set 1) GO_NUCLEOLUS	false	Geneset_Overlap	GO_NCRNA_PROCESSING (Geneset_Overlap_Data Set 1) GO_NUCLEOLUS
RPS23|RPL12|RPS15A|RPL19|RPS13|RPL21|RPLP2|RPLP0|RPS17|RPL26|RPL13A|RPL6|RPL18|RPS16|RPL11|RPS3A|RPL27|RPS25|RPS12|RPS18|RPL7|RPL10A|RPS9|RPS3|RPS7|RPS29|RPL23|RPS6|RPS11|RPL31|RPS5|RPS4X|RPS19|RPSA|RPS14|RPL22|RPS2|RPL15|RPS8	39	0.8118166526492852	GO_NCRNA_PROCESSING (Geneset_Overlap_Data Set 1) GO_PEPTIDE_METABOLIC_PROCESS	false	Geneset_Overlap	GO_NCRNA_PROCESSING (Geneset_Overlap_Data Set 1) GO_PEPTIDE_METABOLIC_PROCESS
RPS7|RPS3|RPS29|RPL23|RPL10A|RPS18|RPL7|RPS9|RPS19|RPSA|RPS14|RPL22|RPS2|RPL15|RPS8|RPS11|RPL31|RPS6|RPS5|RPS4X|RPL19|RPS13|RPL21|RPLP2|RPLP0|RPS17|RPL26|RPS23|RPL12|RPS15A|RPS3A|RPL27|RPS25|RPS12|RPL6|RPL13A|RPL18|RPS16|RPL11	39	0.8545454545454545	GO_RRNA_METABOLIC_PROCESS (Geneset_Overlap_Data Set 1) GO_PROTEIN_TARGETING	false	Geneset_Overlap	GO_RRNA_METABOLIC_PROCESS (Geneset_Overlap_Data Set 1) GO_PROTEIN_TARGETING
RPS7|RPS3|RPS29|RPL23|RPL10A|RPS18|RPL7|RPS9|RPS19|RPSA|RPS14|RPL22|RPS2|RPL15|RPS8|RPS11|RPL31|RPS6|RPS5|RPS4X|RPL19|RPS13|RPL21|RPLP2|RPLP0|RPS17|RPL26|RPS23|RPL12|RPS15A|RPS3A|RPL27|RPS25|RPS12|RPL6|RPL13A|RPL18|RPS16|RPL11	39	0.975609756097561	GO_RRNA_METABOLIC_PROCESS (Geneset_Overlap_Data Set 1) GO_NCRNA_PROCESSING	false	Geneset_Overlap	GO_RRNA_METABOLIC_PROCESS (Geneset_Overlap_Data Set 1) GO_NCRNA_PROCESSING
RPS7|RPS3|RPS29|RPL23|RPL10A|RPS18|RPL7|RPS9|RPS19|RPSA|RPS14|RPL22|RPS2|RPL15|RPS8|RPS11|RPL31|RPS6|RPS5|RPS4X|RPL19|RPS13|RPL21|RPLP2|RPLP0|RPS17|RPL26|RPS23|RPL12|RPS15A|RPS3A|RPL27|RPS25|RPS12|RPL6|RPL13A|RPL18|RPS16|RPL11	39	0.7378048780487805	GO_RRNA_METABOLIC_PROCESS (Geneset_Overlap_Data Set 1) GO_INTRACELLULAR_PROTEIN_TRANSPORT	false	Geneset_Overlap	GO_RRNA_METABOLIC_PROCESS (Geneset_Overlap_Data Set 1) GO_INTRACELLULAR_PROTEIN_TRANSPORT
RPS7|RPS3|RPS29|RPL23|RPL10A|RPS18|RPL7|RPS9|RPS19|RPSA|RPS14|RPL22|RPS2|RPL15|RPS8|RPS11|RPL31|RPS6|RPS5|RPS4X|RPL19|RPS13|RPL21|RPLP2|RPLP0|RPS17|RPL26|RPS23|RPL12|RPS15A|RPS3A|RPL27|RPS25|RPS12|RPL6|RPL13A|RPL18|RPS16|RPL11	39	0.89	GO_RRNA_METABOLIC_PROCESS (Geneset_Overlap_Data Set 1) GO_ESTABLISHMENT_OF_PROTEIN_LOCALIZATION_TO_MEMBRANE	false	Geneset_Overlap	GO_RRNA_METABOLIC_PROCESS (Geneset_Overlap_Data Set 1) GO_ESTABLISHMENT_OF_PROTEIN_LOCALIZATION_TO_MEMBRANE
RPS7|RPS3|RPS29|RPL23|RPL10A|RPS18|RPL7|RPS9|RPS19|RPSA|RPS14|RPL22|RPS2|RPL15|RPS8|RPS11|RPL31|RPS6|RPS5|RPS4X|RPL19|RPS13|RPL21|RPLP2|RPLP0|RPS17|RPL26|RPS23|RPL12|RPS15A|RPS3A|RPL27|RPS25|RPS12|RPL6|RPL13A|RPL18|RPS16|RPL11	39	0.7349397590361446	GO_RRNA_METABOLIC_PROCESS (Geneset_Overlap_Data Set 1) GO_INTERSPECIES_INTERACTION_BETWEEN_ORGANISMS	false	Geneset_Overlap	GO_RRNA_METABOLIC_PROCESS (Geneset_Overlap_Data Set 1) GO_INTERSPECIES_INTERACTION_BETWEEN_ORGANISMS
RPS7|RPS3|RPS29|RPL23|RPL10A|RPS18|RPL7|RPS9|RPS19|RPSA|RPS14|RPL22|RPS2|RPL15|RPS8|RPS11|RPL31|RPS6|RPS5|RPS4X|RPL19|RPS13|RPL21|RPLP2|RPLP0|RPS17|RPL26|RPS23|RPL12|RPS15A|RPS3A|RPL27|RPS25|RPS12|RPL6|RPL13A|RPL18|RPS16|RPL11	39	0.8545454545454545	GO_RRNA_METABOLIC_PROCESS (Geneset_Overlap_Data Set 1) GO_RNA_PROCESSING	false	Geneset_Overlap	GO_RRNA_METABOLIC_PROCESS (Geneset_Overlap_Data Set 1) GO_RNA_PROCESSING
RPL23|RPL10A|RPL7|RPL22|RPL15|RPL31|RPL19|RPL21|RPLP2|RPLP0|RPL26|RPL12|RPL27|RPL6|RPL13A|RPL18|RPL11	17	0.717948717948718	GO_RRNA_METABOLIC_PROCESS (Geneset_Overlap_Data Set 1) GO_LARGE_RIBOSOMAL_SUBUNIT	false	Geneset_Overlap	GO_RRNA_METABOLIC_PROCESS (Geneset_Overlap_Data Set 1) GO_LARGE_RIBOSOMAL_SUBUNIT
RPS7|RPS3|RPS29|RPL23|RPL10A|RPS18|RPL7|RPS9|RPS19|RPSA|RPS14|RPL22|RPS2|RPL15|RPS8|RPS11|RPL31|RPS6|RPS5|RPS4X|RPL19|RPS13|RPL21|RPLP2|RPLP0|RPS17|RPL26|RPS23|RPL12|RPS15A|RPS3A|RPL27|RPS25|RPS12|RPL6|RPL13A|RPL18|RPS16|RPL11	39	0.8823529411764706	GO_RRNA_METABOLIC_PROCESS (Geneset_Overlap_Data Set 1) GO_CYTOSOLIC_PART	false	Geneset_Overlap	GO_RRNA_METABOLIC_PROCESS (Geneset_Overlap_Data Set 1) GO_CYTOSOLIC_PART
RPS7|RPS3|RPS29|RPL23|RPL10A|RPS18|RPL7|RPS9|RPS19|RPSA|RPS14|RPL22|RPS2|RPL15|RPS8|RPS11|RPL31|RPS6|RPS5|RPS4X|RPL19|RPS13|RPL21|RPLP2|RPLP0|RPS17|RPL26|RPS23|RPL12|RPS15A|RPS3A|RPL27|RPS25|RPS12|RPL6|RPL13A|RPL18|RPS16|RPL11	39	0.8482142857142857	GO_RRNA_METABOLIC_PROCESS (Geneset_Overlap_Data Set 1) GO_PEPTIDE_METABOLIC_PROCESS	false	Geneset_Overlap	GO_RRNA_METABOLIC_PROCESS (Geneset_Overlap_Data Set 1) GO_PEPTIDE_METABOLIC_PROCESS
RPS7|RPS3|RPS29|RPL23|RPL10A|RPS18|RPL7|RPS9|RPS19|RPSA|RPS14|RPL22|RPS2|RPL15|RPS8|RPS11|RPL31|RPS6|RPS5|RPS4X|RPL19|RPS13|RPL21|RPLP2|RPLP0|RPS17|RPL26|RPS23|RPL12|RPS15A|RPS3A|RPL27|RPS25|RPS12|RPL6|RPL13A|RPL18|RPS16|RPL11	39	0.825	GO_RRNA_METABOLIC_PROCESS (Geneset_Overlap_Data Set 1) GO_CELLULAR_AMIDE_METABOLIC_PROCESS	false	Geneset_Overlap	GO_RRNA_METABOLIC_PROCESS (Geneset_Overlap_Data Set 1) GO_CELLULAR_AMIDE_METABOLIC_PROCESS
RPS7|RPS3|RPS29|RPL23|RPL10A|RPS18|RPL7|RPS9|RPS19|RPSA|RPS14|RPL22|RPS2|RPL15|RPS8|RPS11|RPL31|RPS6|RPS5|RPS4X|RPL19|RPS13|RPL21|RPLP2|RPLP0|RPS17|RPL26|RPS23|RPL12|RPS15A|RPS3A|RPL27|RPS25|RPS12|RPL6|RPL13A|RPL18|RPS16|RPL11	39	0.9642857142857143	GO_RRNA_METABOLIC_PROCESS (Geneset_Overlap_Data Set 1) GO_RNA_CATABOLIC_PROCESS	false	Geneset_Overlap	GO_RRNA_METABOLIC_PROCESS (Geneset_Overlap_Data Set 1) GO_RNA_CATABOLIC_PROCESS
RPS7|RPS3|RPL23|RPL10A|RPL7|RPS9|RPS19|RPS14|RPS2|RPS11|RPS6|RPL19|RPS13|RPL21|RPS23|RPL12|RPS3A|RPS25|RPL13A|RPL18|RPL11	21	0.45344129554655865	GO_RRNA_METABOLIC_PROCESS (Geneset_Overlap_Data Set 1) GO_NUCLEOLUS	false	Geneset_Overlap	GO_RRNA_METABOLIC_PROCESS (Geneset_Overlap_Data Set 1) GO_NUCLEOLUS
RPS7|RPS3|RPS29|RPL23|RPL10A|RPS18|RPL7|RPS9|RPS19|RPSA|RPS14|RPL22|RPS2|RPL15|RPS8|RPS11|RPL31|RPS6|RPS5|RPS4X|RPL19|RPS13|RPL21|RPLP2|RPLP0|RPS17|RPL26|RPS23|RPL12|RPS15A|RPS3A|RPL27|RPS25|RPS12|RPL6|RPL13A|RPL18|RPS16|RPL11	39	0.9875	GO_RRNA_METABOLIC_PROCESS (Geneset_Overlap_Data Set 1) GO_RIBOSOMAL_SUBUNIT	false	Geneset_Overlap	GO_RRNA_METABOLIC_PROCESS (Geneset_Overlap_Data Set 1) GO_RIBOSOMAL_SUBUNIT
RPS7|RPS3|RPS29|RPL23|RPL10A|RPS18|RPL7|RPS9|RPS19|RPSA|RPS14|RPL22|RPS2|RPL15|RPS8|RPS11|RPL31|RPS6|RPS5|RPS4X|RPL19|RPS13|RPL21|RPLP2|RPLP0|RPS17|RPL26|RPS23|RPL12|RPS15A|RPS3A|RPL27|RPS25|RPS12|RPL6|RPL13A|RPL18|RPS16|RPL11	39	0.8823529411764706	GO_RRNA_METABOLIC_PROCESS (Geneset_Overlap_Data Set 1) GO_AMIDE_BIOSYNTHETIC_PROCESS	false	Geneset_Overlap	GO_RRNA_METABOLIC_PROCESS (Geneset_Overlap_Data Set 1) GO_AMIDE_BIOSYNTHETIC_PROCESS
RPS7|RPS3|RPS29|RPL23|RPL10A|RPS18|RPL7|RPS9|RPS19|RPSA|RPS14|RPL22|RPS2|RPL15|RPS8|RPS11|RPL31|RPS6|RPS5|RPS4X|RPL19|RPS13|RPL21|RPLP2|RPLP0|RPS17|RPL26|RPS23|RPL12|RPS15A|RPS3A|RPL27|RPS25|RPS12|RPL6|RPL13A|RPL18|RPS16|RPL11	39	0.8679245283018868	GO_RRNA_METABOLIC_PROCESS (Geneset_Overlap_Data Set 1) GO_MRNA_METABOLIC_PROCESS	false	Geneset_Overlap	GO_RRNA_METABOLIC_PROCESS (Geneset_Overlap_Data Set 1) GO_MRNA_METABOLIC_PROCESS
RPS7|RPS3|RPS29|RPL23|RPL10A|RPS18|RPL7|RPS9|RPS19|RPSA|RPS14|RPL22|RPS2|RPL15|RPS8|RPS11|RPL31|RPS6|RPS5|RPS4X|RPL19|RPS13|RPL21|RPLP2|RPLP0|RPS17|RPL26|RPS23|RPL12|RPS15A|RPS3A|RPL27|RPS25|RPS12|RPL6|RPL13A|RPL18|RPS16|RPL11	39	0.8095238095238095	GO_MACROMOLECULE_CATABOLIC_PROCESS (Geneset_Overlap_Data Set 1) GO_RRNA_METABOLIC_PROCESS	false	Geneset_Overlap	GO_MACROMOLECULE_CATABOLIC_PROCESS (Geneset_Overlap_Data Set 1) GO_RRNA_METABOLIC_PROCESS
RPS7|RPS3|RPS29|RPL23|RPL10A|RPS18|RPL7|RPS9|RPS19|RPSA|RPS14|RPL22|RPS2|RPL15|RPS8|RPS11|RPL31|RPS6|RPS5|RPS4X|RPL19|RPS13|RPL21|RPLP2|RPLP0|RPS17|RPL26|RPS23|RPL12|RPS15A|RPS3A|RPL27|RPS25|RPS12|RPL6|RPL13A|RPL18|RPS16|RPL11	39	0.975609756097561	GO_RRNA_METABOLIC_PROCESS (Geneset_Overlap_Data Set 1) GO_PROTEIN_TARGETING_TO_MEMBRANE	false	Geneset_Overlap	GO_RRNA_METABOLIC_PROCESS (Geneset_Overlap_Data Set 1) GO_PROTEIN_TARGETING_TO_MEMBRANE
RPS7|RPS3|RPS29|RPL23|RPL10A|RPS18|RPL7|RPS9|RPS19|RPSA|RPS14|RPL22|RPS2|RPL15|RPS8|RPS11|RPL31|RPS6|RPS5|RPS4X|RPL19|RPS13|RPL21|RPLP2|RPLP0|RPS17|RPL26|RPS23|RPL12|RPS15A|RPS3A|RPL27|RPS25|RPS12|RPL6|RPL13A|RPL18|RPS16|RPL11	39	0.8545454545454545	GO_RRNA_METABOLIC_PROCESS (Geneset_Overlap_Data Set 1) GO_PROTEIN_LOCALIZATION_TO_MEMBRANE	false	Geneset_Overlap	GO_RRNA_METABOLIC_PROCESS (Geneset_Overlap_Data Set 1) GO_PROTEIN_LOCALIZATION_TO_MEMBRANE
RPS7|RPS3|RPS29|RPL23|RPL10A|RPS18|RPL7|RPS9|RPS19|RPSA|RPS14|RPL22|RPS2|RPL15|RPS8|RPS11|RPL31|RPS6|RPS5|RPS4X|RPL19|RPS13|RPL21|RPLP2|RPLP0|RPS17|RPL26|RPS23|RPL12|RPS15A|RPS3A|RPL27|RPS25|RPS12|RPL6|RPL13A|RPL18|RPS16|RPL11	39	0.9534883720930232	GO_RRNA_METABOLIC_PROCESS (Geneset_Overlap_Data Set 1) GO_RIBOSOME	false	Geneset_Overlap	GO_RRNA_METABOLIC_PROCESS (Geneset_Overlap_Data Set 1) GO_RIBOSOME
RPS7|RPS5|RPS6|RPL26|RPS16|RPL18|RPS3|RPS9|RPS8|RPL31|RPLP2|RPS13|RPL12|RPS23|RPL11|RPL23|RPS2|RPL15|RPSA|RPS11|RPS17|RPLP0|RPL19|RPL21|RPS29|RPS18|RPL7|RPL10A|RPL22|RPS14|RPS19|RPS4X|RPS15A|RPS12|RPS25|RPL27|RPS3A|RPL6|RPL13A	39	0.5610526315789474	GO_CELLULAR_CATABOLIC_PROCESS (Geneset_Overlap_Data Set 1) GO_ESTABLISHMENT_OF_PROTEIN_LOCALIZATION_TO_MEMBRANE	false	Geneset_Overlap	GO_CELLULAR_CATABOLIC_PROCESS (Geneset_Overlap_Data Set 1) GO_ESTABLISHMENT_OF_PROTEIN_LOCALIZATION_TO_MEMBRANE
CTSB|RPS7|RPS6|RPL18|RPS3|RPS9|RPS13|RPL12|RPS23|RPL11|UBE2N|RPL23|RPS2|RPS11|RPL19|RPL21|RPL7|RPL10A|RPS14|RPS19|RPS25|RPS3A|ACADVL|RPL13A	24	0.409387222946545	GO_CELLULAR_CATABOLIC_PROCESS (Geneset_Overlap_Data Set 1) GO_NUCLEOLUS	false	Geneset_Overlap	GO_CELLULAR_CATABOLIC_PROCESS (Geneset_Overlap_Data Set 1) GO_NUCLEOLUS
RPS7|RPS5|RPS6|RPL26|RPS16|RPL18|RPS3|RPS9|RPS8|RPL31|RPLP2|RPS13|RPL12|RPS23|RPL11|RPL23|RPS2|RPL15|RPSA|RPS11|RPS17|RPLP0|RPL19|RPL21|HSD17B10|RPS29|RPS18|RPL7|RPL10A|RPL22|RPS14|RPS19|RPS4X|RPS15A|RPS12|RPS25|RPL27|RPS3A|RPL6|RPL13A	40	0.6666666666666666	GO_CELLULAR_CATABOLIC_PROCESS (Geneset_Overlap_Data Set 1) GO_NCRNA_METABOLIC_PROCESS	false	Geneset_Overlap	GO_CELLULAR_CATABOLIC_PROCESS (Geneset_Overlap_Data Set 1) GO_NCRNA_METABOLIC_PROCESS
RPS7|RPS5|RPS6|RPL26|RPS16|RPL18|RPS3|RPS9|RPS8|RPL31|RPLP2|RPS13|RPL12|RPS23|RPL11|RPL23|RPS2|RPL15|RPSA|RPS11|RPS17|RPLP0|RPL19|RPL21|PABPC1|RPS29|RPS18|RPL7|RPL10A|RPL22|RPS14|RPS19|RPS4X|RPS15A|RPS12|RPS25|RPL27|RPS3A|RPL6|RPL13A	40	0.5675954592363261	GO_CELLULAR_CATABOLIC_PROCESS (Geneset_Overlap_Data Set 1) GO_AMIDE_BIOSYNTHETIC_PROCESS	false	Geneset_Overlap	GO_CELLULAR_CATABOLIC_PROCESS (Geneset_Overlap_Data Set 1) GO_AMIDE_BIOSYNTHETIC_PROCESS
RPS7|RPS5|RPS6|RPL26|CTNNB1|RPS16|RPL18|RPS3|RPS9|RPS8|RPL31|RPLP2|RPS13|RPL12|RPS23|RPL11|RAB7A|KPNB1|RPL23|RPS2|RPL15|RPSA|RPS11|RPS17|RPLP0|RPL19|RPL21|RPS29|RPS18|RPL7|RPL10A|RPL22|RPS14|RPS19|RPS4X|RPS15A|RPS12|RPS25|RPL27|RPS3A|RPL6|RPL13A	42	0.5628526645768025	GO_CELLULAR_CATABOLIC_PROCESS (Geneset_Overlap_Data Set 1) GO_PROTEIN_TARGETING	false	Geneset_Overlap	GO_CELLULAR_CATABOLIC_PROCESS (Geneset_Overlap_Data Set 1) GO_PROTEIN_TARGETING
RPS7|RPS5|RPS6|RPL26|RPS16|RPL18|RPS3|RPS9|RPS8|RPL31|RPLP2|RPS13|RPL12|RPS23|RPL11|RPL23|RPS2|RPL15|RPSA|RPS11|RPS17|RPLP0|RPL19|RPL21|HSD17B10|RPS29|RPS18|RPL7|RPL10A|RPL22|RPS14|RPS19|RPS4X|RPS15A|RPS12|RPS25|RPL27|RPS3A|RPL6|RPL13A	40	0.6801125703564728	GO_CELLULAR_CATABOLIC_PROCESS (Geneset_Overlap_Data Set 1) GO_NCRNA_PROCESSING	false	Geneset_Overlap	GO_CELLULAR_CATABOLIC_PROCESS (Geneset_Overlap_Data Set 1) GO_NCRNA_PROCESSING
RPS7|RPS5|RPS6|RPL26|RPS16|RPL18|RPS3|RPS9|RPS8|RPL31|RPLP2|HNRNPD|RPS13|RPL12|RPS23|RPL11|RPL23|RPS2|RPL15|RPSA|RPS11|RPS17|RPLP0|RPL19|RPL21|PABPC1|HSD17B10|RPS29|RPS18|RPL7|RPL10A|RPL22|KHSRP|RPS14|RPS19|RPS4X|RPS15A|RPS12|RPS25|RPL27|RPS3A|RPL6|RPL13A	43	0.5778656126482213	GO_CELLULAR_CATABOLIC_PROCESS (Geneset_Overlap_Data Set 1) GO_RNA_PROCESSING	false	Geneset_Overlap	GO_CELLULAR_CATABOLIC_PROCESS (Geneset_Overlap_Data Set 1) GO_RNA_PROCESSING
RPS7|RPS5|RPS6|RPL26|RPS16|RPL18|RPS3|RPS9|RPS8|RPL31|RPLP2|RPS13|RPL12|RPS23|RPL11|RPL23|RPS2|RPL15|RPSA|RPS11|RPS17|RPLP0|RPL19|RPL21|RPS29|RPS18|RPL7|RPL10A|RPL22|RPS14|RPS19|RPS4X|HBA1|RPS15A|RPS12|RPS25|RPL27|RPS3A|RPL6|RPL13A	40	0.6941747572815534	GO_CELLULAR_CATABOLIC_PROCESS (Geneset_Overlap_Data Set 1) GO_RIBOSOMAL_SUBUNIT	false	Geneset_Overlap	GO_CELLULAR_CATABOLIC_PROCESS (Geneset_Overlap_Data Set 1) GO_RIBOSOMAL_SUBUNIT
RPS7|RPS5|RPS6|RPL26|CTNNB1|HSP90B1|RPS16|RPL18|RPS3|RPS9|RPS8|RPL31|RPLP2|RPS13|RPL12|RPS23|RPL11|RAB7A|KPNB1|RPL23|RPS2|RPL15|RPSA|RPS11|RPS17|RPLP0|RPL19|RPL21|RPS29|RPS18|RPL7|RPL10A|RPL22|RPS14|RPS19|RPS4X|RPS15A|VCP|RPS12|RPS25|RPL27|RPS3A|RPL6|RPL13A	44	0.42432105172115553	GO_CELLULAR_CATABOLIC_PROCESS (Geneset_Overlap_Data Set 1) GO_INTRACELLULAR_PROTEIN_TRANSPORT	false	Geneset_Overlap	GO_CELLULAR_CATABOLIC_PROCESS (Geneset_Overlap_Data Set 1) GO_INTRACELLULAR_PROTEIN_TRANSPORT
RPS7|RPS5|RPS6|RPL26|RPS16|RPL18|RPS3|RPS9|RPS8|RPL31|RPLP2|RPS13|RPL12|RPS23|RPL11|RPL23|RPS2|RPL15|RPSA|RPS11|RPS17|RPLP0|RPL19|RPL21|RPS29|RPS18|RPL7|RPL10A|RPL22|RPS14|RPS19|RPS4X|RPS15A|RPS12|RPS25|RPL27|RPS3A|RPL6|RPL13A	39	0.6893203883495146	GO_CELLULAR_CATABOLIC_PROCESS (Geneset_Overlap_Data Set 1) GO_ESTABLISHMENT_OF_PROTEIN_LOCALIZATION_TO_ENDOPLASMIC_RETICULUM	false	Geneset_Overlap	GO_CELLULAR_CATABOLIC_PROCESS (Geneset_Overlap_Data Set 1) GO_ESTABLISHMENT_OF_PROTEIN_LOCALIZATION_TO_ENDOPLASMIC_RETICULUM
CTSB|RPS7|RPS5|RPS6|RPL26|CTNNB1|HSP90B1|RPS16|RPL18|RPS3|PSMB6|RPS9|RPS8|PSMA1|RPL31|RPLP2|SKP1|HMGB1|HNRNPD|RPS13|RPL12|RPS23|RPL11|RAB7A|PSMB5|KPNB1|UBE2N|RPL23|APOE|RPS2|RPL15|RPSA|UBA1|RPS11|RPS17|RPLP0|RPL19|RPL21|PABPC1|PSMA2|UCHL1|PSMD2|PSMB4|RPS29|RPS18|RPL7|PSMA6|RPL10A|GAA|RPL22|KHSRP|RPS14|RPS19|RPS4X|RPS15A|VCP|RPS12|RPS25|RPL27|RPS3A|RPL6|RPL13A	62	0.7901404151404151	GO_CELLULAR_CATABOLIC_PROCESS (Geneset_Overlap_Data Set 1) GO_MACROMOLECULE_CATABOLIC_PROCESS	false	Geneset_Overlap	GO_CELLULAR_CATABOLIC_PROCESS (Geneset_Overlap_Data Set 1) GO_MACROMOLECULE_CATABOLIC_PROCESS
RPS7|RPS5|RPS6|RPL26|RPS16|RPL18|RPS3|RPS9|RPS8|RPL31|RPLP2|RPS13|RPL12|RPS23|RPL11|RPL23|RPS2|RPL15|RPSA|RPS11|RPS17|RPLP0|RPL19|RPL21|RPS29|RPS18|RPL7|RPL10A|RPL22|RPS14|RPS19|RPS4X|HBA1|RPS15A|RPS12|RPS25|RPL27|RPS3A|RPL6|RPL13A	40	0.6537955243527863	GO_CELLULAR_CATABOLIC_PROCESS (Geneset_Overlap_Data Set 1) GO_RIBOSOME	false	Geneset_Overlap	GO_CELLULAR_CATABOLIC_PROCESS (Geneset_Overlap_Data Set 1) GO_RIBOSOME
RPS7|RPS5|RPS6|RPL26|RPS16|RPL18|RPS3|RPS9|RPS8|RPL31|RPLP2|RPS13|RPL12|RPS23|RPL11|RPL23|APOE|RPS2|RPL15|RPSA|RPS11|RPS17|RPLP0|RPL19|RPL21|RPS29|RPS18|RPL7|RPL10A|RPL22|RPS14|RPS19|RPS4X|SCP2|RPS15A|RPS12|RPS25|RPL27|RPS3A|RPL6|RPL13A	41	0.5479409479409479	GO_CELLULAR_CATABOLIC_PROCESS (Geneset_Overlap_Data Set 1) GO_PROTEIN_LOCALIZATION_TO_MEMBRANE	false	Geneset_Overlap	GO_CELLULAR_CATABOLIC_PROCESS (Geneset_Overlap_Data Set 1) GO_PROTEIN_LOCALIZATION_TO_MEMBRANE
RPS7|RPS5|RPS6|RPL26|RPS16|RPL18|RPS3|RPS9|RPS8|RPL31|RPLP2|RPS13|RPL12|RPS23|RPL11|RPL23|RPS2|RPL15|RPSA|RPS11|RPS17|RPLP0|RPL19|RPL21|RPS29|RPS18|RPL7|RPL10A|RPL22|RPS14|RPS19|RPS4X|RPS15A|RPS12|RPS25|RPL27|RPS3A|RPL6|RPL13A	39	0.6613240418118467	GO_CELLULAR_CATABOLIC_PROCESS (Geneset_Overlap_Data Set 1) GO_PROTEIN_TARGETING_TO_MEMBRANE	false	Geneset_Overlap	GO_CELLULAR_CATABOLIC_PROCESS (Geneset_Overlap_Data Set 1) GO_PROTEIN_TARGETING_TO_MEMBRANE
RPS7|RPS5|RPS6|RPL26|RPS16|RPL18|RPS3|RPS9|RPS8|RPL31|RPLP2|HNRNPD|RPS13|RPL12|RPS23|RPL11|RPL23|RPS2|RPL15|RPSA|RPS11|RPS17|RPLP0|RPL19|RPL21|PABPC1|RPS29|RPS18|RPL7|RPL10A|RPL22|KHSRP|RPS14|RPS19|RPS4X|RPS15A|RPS12|RPS25|RPL27|RPS3A|RPL6|RPL13A	42	0.7038834951456311	GO_CELLULAR_CATABOLIC_PROCESS (Geneset_Overlap_Data Set 1) GO_RNA_CATABOLIC_PROCESS	false	Geneset_Overlap	GO_CELLULAR_CATABOLIC_PROCESS (Geneset_Overlap_Data Set 1) GO_RNA_CATABOLIC_PROCESS
RPS7|RPS5|RPS6|RPL26|HBB|RPS16|RPL18|RPS3|RPS9|RPS8|RPL31|RPLP2|RPS13|RPL12|RPS23|RPL11|RPL23|RPS2|RPL15|RPSA|RPS11|RPS17|RPLP0|RPL19|RPL21|PSMD2|RPS29|RPS18|PRDX3|RPL7|RPL10A|RPL22|RPS14|RPS19|RPS4X|HBA1|RPS15A|RPS12|RPS25|RPL27|RPS3A|RPL6|RPL13A	43	0.615262321144674	GO_CELLULAR_CATABOLIC_PROCESS (Geneset_Overlap_Data Set 1) GO_CYTOSOLIC_PART	false	Geneset_Overlap	GO_CELLULAR_CATABOLIC_PROCESS (Geneset_Overlap_Data Set 1) GO_CYTOSOLIC_PART
RPL26|RPL18|RPL31|RPLP2|RPL12|RPL11|RPL23|RPL15|RPLP0|RPL19|RPL21|RPL7|RPL10A|RPL22|RPL27|RPL6|RPL13A	17	0.5825242718446602	GO_CELLULAR_CATABOLIC_PROCESS (Geneset_Overlap_Data Set 1) GO_LARGE_RIBOSOMAL_SUBUNIT	false	Geneset_Overlap	GO_CELLULAR_CATABOLIC_PROCESS (Geneset_Overlap_Data Set 1) GO_LARGE_RIBOSOMAL_SUBUNIT
RPS7|RPS5|RPS6|RPL26|RPS16|RPL18|RPS3|RPS9|RPS8|RPL31|RPLP2|RPS13|RPL12|RPS23|RPL11|RPL23|RPS2|RPL15|RPSA|RPS11|RPS17|RPLP0|RPL19|RPL21|PABPC1|RPS29|RPS18|RPL7|RPL10A|RPL22|RPS14|RPS19|RPS4X|RPS15A|RPS12|RPS25|RPL27|RPS3A|RPL6|RPL13A	40	0.6941747572815534	GO_CELLULAR_CATABOLIC_PROCESS (Geneset_Overlap_Data Set 1) GO_NUCLEAR_TRANSCRIBED_MRNA_CATABOLIC_PROCESS_NONSENSE_MEDIATED_DECAY	false	Geneset_Overlap	GO_CELLULAR_CATABOLIC_PROCESS (Geneset_Overlap_Data Set 1) GO_NUCLEAR_TRANSCRIBED_MRNA_CATABOLIC_PROCESS_NONSENSE_MEDIATED_DECAY
CTSB|RPS7|RPS5|RPS6|RPL26|RPS16|RPL18|RPS3|PSMB6|RPS9|RPS8|RPL31|RPLP2|RPS13|RPL12|RPS23|RPL11|RAB7A|PSMB5|KPNB1|RPL23|APOE|RPS2|RPL15|RPSA|RPS11|RPS17|RPLP0|RPL19|RPL21|PSMB4|RPS29|RPS18|RPL7|RPL10A|RPL22|RPS14|RPS19|RPS4X|RPS15A|VCP|RPS12|RPS25|RPL27|RPS3A|RPL6|RPL13A	47	0.4521972783219208	GO_CELLULAR_CATABOLIC_PROCESS (Geneset_Overlap_Data Set 1) GO_INTERSPECIES_INTERACTION_BETWEEN_ORGANISMS	false	Geneset_Overlap	GO_CELLULAR_CATABOLIC_PROCESS (Geneset_Overlap_Data Set 1) GO_INTERSPECIES_INTERACTION_BETWEEN_ORGANISMS
RPS7|RPS5|RPS6|RPL26|RPS16|RPL18|RPS3|RPS9|RPS8|RPL31|RPLP2|HNRNPD|RPS13|RPL12|RPS23|RPL11|RPL23|RPS2|RPL15|RPSA|RPS11|RPS17|RPLP0|RPL19|RPL21|PABPC1|RPS29|RPS18|RPL7|RPL10A|RPL22|KHSRP|RPS14|RPS19|RPS4X|RPS15A|RPS12|RPS25|RPL27|RPS3A|RPL6|RPL13A	42	0.5804369414101291	GO_CELLULAR_CATABOLIC_PROCESS (Geneset_Overlap_Data Set 1) GO_MRNA_METABOLIC_PROCESS	false	Geneset_Overlap	GO_CELLULAR_CATABOLIC_PROCESS (Geneset_Overlap_Data Set 1) GO_MRNA_METABOLIC_PROCESS
RPS7|RPS5|RPS6|RPL26|RPS16|RPL18|RPS3|RPS9|RPS8|RPL31|RPLP2|RPS13|RPL12|RPS23|RPL11|RPL23|RPS2|RPL15|RPSA|RPS11|RPS17|RPLP0|RPL19|RPL21|RPS29|RPS18|RPL7|RPL10A|RPL22|RPS14|RPS19|RPS4X|RPS15A|RPS12|RPS25|RPL27|RPS3A|RPL6|RPL13A	39	0.6893203883495146	GO_CELLULAR_CATABOLIC_PROCESS (Geneset_Overlap_Data Set 1) GO_RRNA_METABOLIC_PROCESS	false	Geneset_Overlap	GO_CELLULAR_CATABOLIC_PROCESS (Geneset_Overlap_Data Set 1) GO_RRNA_METABOLIC_PROCESS
RPS7|RPS5|RPS6|RPL26|RPS16|RPL18|RPS3|RPS9|RPS8|RPL31|RPLP2|RPS13|RPL12|RPS23|RPL11|RPL23|RPS2|RPL15|RPSA|RPS11|RPS17|RPLP0|RPL19|RPL21|RPS29|RPS18|RPL7|RPL10A|RPL22|RPS14|RPS19|RPS4X|RPS15A|RPS12|RPS25|RPL27|RPS3A|RPL6|RPL13A	39	0.675	GO_CELLULAR_CATABOLIC_PROCESS (Geneset_Overlap_Data Set 1) GO_MULTI_ORGANISM_METABOLIC_PROCESS	false	Geneset_Overlap	GO_CELLULAR_CATABOLIC_PROCESS (Geneset_Overlap_Data Set 1) GO_MULTI_ORGANISM_METABOLIC_PROCESS
GLS|RPS7|GLUD1|ABAT|GOT1|RPS5|RPS6|RPL26|RPS16|RPL18|RPS3|RPS9|RPS8|RPL31|RPLP2|RPS13|RPL12|RPS23|RPL11|RPL23|RPS2|RPL15|RPSA|RPS11|RPS17|RPLP0|RPL19|RPL21|PABPC1|GOT2|RPS29|RPS18|RPL7|RPL10A|RPL22|RPS14|RPS19|RPS4X|OAT|RPS15A|RPS12|RPS25|RPL27|RPS3A|RPL6|RPL13A	46	0.4652421652421652	GO_CELLULAR_CATABOLIC_PROCESS (Geneset_Overlap_Data Set 1) GO_ORGANONITROGEN_COMPOUND_BIOSYNTHETIC_PROCESS	false	Geneset_Overlap	GO_CELLULAR_CATABOLIC_PROCESS (Geneset_Overlap_Data Set 1) GO_ORGANONITROGEN_COMPOUND_BIOSYNTHETIC_PROCESS
RPS7|RPS5|RPS6|RPL26|RPS16|RPL18|RPS3|RPS9|RPS8|RPL31|RPLP2|RPS13|RPL12|RPS23|RPL11|RPL23|RPS2|RPL15|RPSA|RPS11|RPS17|RPLP0|RPL19|RPL21|PABPC1|RPS29|RPS18|RPL7|RPL10A|RPL22|RPS14|RPS19|RPS4X|RPS15A|RPS12|RPS25|RPL27|RPS3A|RPL6|RPL13A	40	0.4959349593495935	GO_CELLULAR_CATABOLIC_PROCESS (Geneset_Overlap_Data Set 1) GO_CELLULAR_AMIDE_METABOLIC_PROCESS	false	Geneset_Overlap	GO_CELLULAR_CATABOLIC_PROCESS (Geneset_Overlap_Data Set 1) GO_CELLULAR_AMIDE_METABOLIC_PROCESS
RPS7|RPS5|RPS6|RPL26|RPS16|RPL18|RPS3|RPS9|RPS8|RPL31|RPLP2|RPS13|RPL12|RPS23|RPL11|RPL23|RPS2|RPL15|RPSA|RPS11|RPS17|RPLP0|RPL19|RPL21|PABPC1|RPS29|RPS18|RPL7|RPL10A|RPL22|RPS14|RPS19|RPS4X|RPS15A|RPS12|RPS25|RPL27|RPS3A|RPL6|RPL13A	40	0.5252100840336135	GO_CELLULAR_CATABOLIC_PROCESS (Geneset_Overlap_Data Set 1) GO_PEPTIDE_METABOLIC_PROCESS	false	Geneset_Overlap	GO_CELLULAR_CATABOLIC_PROCESS (Geneset_Overlap_Data Set 1) GO_PEPTIDE_METABOLIC_PROCESS
RPS7|RPS5|RPS6|RPL26|RPS16|RPL18|RPS3|RPS9|RPS8|RPL31|RPLP2|RPS13|RPL12|RPS23|RPL11|RPL23|RPS2|RPL15|RPSA|RPS11|RPS17|RPLP0|RPL19|RPL21|RPS29|RPS18|RPL7|RPL10A|RPL22|RPS14|RPS19|RPS4X|RPS15A|RPS12|RPL27|RPS3A|RPL6|RPL13A	38	0.6426599171652094	GO_CELLULAR_CATABOLIC_PROCESS (Geneset_Overlap_Data Set 1) GO_STRUCTURAL_CONSTITUENT_OF_RIBOSOME	false	Geneset_Overlap	GO_CELLULAR_CATABOLIC_PROCESS (Geneset_Overlap_Data Set 1) GO_STRUCTURAL_CONSTITUENT_OF_RIBOSOME
RPS7|RPS5|RPS6|RPL26|RPS16|RPL18|RPS3|RPS9|RPS8|RPL31|RPLP2|RPS13|RPL12|RPS23|RPL11|RPL23|RPS2|RPL15|RPSA|RPS11|RPS17|RPLP0|RPL19|RPL21|RPS29|RPS18|RPL7|RPL10A|RPL22|RPS14|RPS19|RPS4X|RPS15A|RPS12|RPS25|RPL27|RPS3A|RPL6|RPL13A	39	0.6011857707509881	GO_CELLULAR_CATABOLIC_PROCESS (Geneset_Overlap_Data Set 1) GO_RIBONUCLEOPROTEIN_COMPLEX_BIOGENESIS	false	Geneset_Overlap	GO_CELLULAR_CATABOLIC_PROCESS (Geneset_Overlap_Data Set 1) GO_RIBONUCLEOPROTEIN_COMPLEX_BIOGENESIS
RPLP2|RPS13|RPS15A|RPL12|RPS23|RPS12|RPS25|RPL27|RPS3A|RPL11|RPL13A|RPL6|RPS3|RPS29|RPS9|RPS18|RPL7|RPL10A|RPS8|RPL22|RPS14|RPS19|RPS4X|RPL31|RPS17|RPL26|RPLP0|RPL19|RPL21|HNRNPA1|RPS16|RPL18|RPL23|C1QBP|SYNCRIP|RPS7|HSPA8|HNRNPK|RPS2|RPL15|RPSA|RPS5|RPS6|RPS11	44	0.6340425531914894	GO_INTERSPECIES_INTERACTION_BETWEEN_ORGANISMS (Geneset_Overlap_Data Set 1) GO_RNA_PROCESSING	false	Geneset_Overlap	GO_INTERSPECIES_INTERACTION_BETWEEN_ORGANISMS (Geneset_Overlap_Data Set 1) GO_RNA_PROCESSING
RPLP2|RPS13|RPS15A|RPL12|RPS23|VAPB|RPS12|RPS25|RPL27|RPS3A|RPL11|RPL13A|RPL6|RPS3|RPS29|SLC25A4|RPS9|RPS18|RPL7|VAPA|RPL10A|RPS8|RPL22|RPS14|RPS19|RPS4X|RPL31|RPS17|RPL26|RPLP0|RPL19|RPL21|RPS16|RPL18|RPL23|RPS7|RPS2|RPL15|EIF3A|RPSA|RPS5|RPS6|RPS11	43	0.4578444154715341	GO_INTERSPECIES_INTERACTION_BETWEEN_ORGANISMS (Geneset_Overlap_Data Set 1) GO_ORGANONITROGEN_COMPOUND_BIOSYNTHETIC_PROCESS	false	Geneset_Overlap	GO_INTERSPECIES_INTERACTION_BETWEEN_ORGANISMS (Geneset_Overlap_Data Set 1) GO_ORGANONITROGEN_COMPOUND_BIOSYNTHETIC_PROCESS
RPLP2|RPS13|RPS15A|RPL12|RPS23|RPS12|RPS25|RPL27|RPS3A|RPL11|RPL13A|RPL6|RPS3|RPS29|RPS9|RPS18|RPL7|RPL10A|RPS8|RPL22|RPS14|RPS19|RPS4X|RPL31|RPS17|RPL26|RPLP0|RPL19|RPL21|RPS16|RPL18|RPL23|RPS7|RPS2|RPL15|RPSA|RPS5|RPS6|RPS11	39	0.5974468085106384	GO_INTERSPECIES_INTERACTION_BETWEEN_ORGANISMS (Geneset_Overlap_Data Set 1) GO_ESTABLISHMENT_OF_PROTEIN_LOCALIZATION_TO_MEMBRANE	false	Geneset_Overlap	GO_INTERSPECIES_INTERACTION_BETWEEN_ORGANISMS (Geneset_Overlap_Data Set 1) GO_ESTABLISHMENT_OF_PROTEIN_LOCALIZATION_TO_MEMBRANE
RPLP2|RPS13|RPS15A|RPL12|RPS23|RPS12|RPS25|RPL27|RPS3A|RPL11|RPL13A|RPL6|RPS3|RPS29|RPS9|RPS18|RPL7|RPL10A|RPS8|RPL22|RPS14|RPS19|RPS4X|RPL31|RPS17|RPL26|RPLP0|RPL19|RPL21|RPS16|RPL18|RPL23|RPS7|RPS2|RPL15|EIF3A|RPSA|RPS5|RPS6|RPS11	40	0.7409638554216867	GO_INTERSPECIES_INTERACTION_BETWEEN_ORGANISMS (Geneset_Overlap_Data Set 1) GO_MULTI_ORGANISM_METABOLIC_PROCESS	false	Geneset_Overlap	GO_INTERSPECIES_INTERACTION_BETWEEN_ORGANISMS (Geneset_Overlap_Data Set 1) GO_MULTI_ORGANISM_METABOLIC_PROCESS
RPLP2|RPS13|RPS15A|RPL12|RPS23|RPS12|RPS25|RPL27|RPS3A|RPL11|RPL13A|RPL6|RPS3|RPS29|RPS9|RPS18|RPL7|RPL10A|RPS8|RPL22|RPS14|RPS19|RPS4X|RPL31|RPS17|RPL26|RPLP0|RPL19|RPL21|RPS16|RPL18|RPL23|RPS7|RPS2|RPL15|RPSA|RPS5|RPS6|RPS11	39	0.7050215208034433	GO_INTERSPECIES_INTERACTION_BETWEEN_ORGANISMS (Geneset_Overlap_Data Set 1) GO_PROTEIN_TARGETING_TO_MEMBRANE	false	Geneset_Overlap	GO_INTERSPECIES_INTERACTION_BETWEEN_ORGANISMS (Geneset_Overlap_Data Set 1) GO_PROTEIN_TARGETING_TO_MEMBRANE
NPM1|RAN|RPS13|RPL12|RPS23|RPS25|RPS3A|RPL11|RPL13A|RPS3|RPS9|RPL7|RPL10A|RPS14|RPS19|XPO1|RPL19|RPL21|RPL18|RPL23|C1QBP|CTSB|RPS7|HSPA8|RPS2|EIF3A|RPS6|RPS11	28	0.5079105291871249	GO_INTERSPECIES_INTERACTION_BETWEEN_ORGANISMS (Geneset_Overlap_Data Set 1) GO_NUCLEOLUS	false	Geneset_Overlap	GO_INTERSPECIES_INTERACTION_BETWEEN_ORGANISMS (Geneset_Overlap_Data Set 1) GO_NUCLEOLUS
RPLP2|RPS13|RPS15A|RPL12|RPS23|RPS12|RPS25|RPL27|RPS3A|RPL11|RPL13A|RPL6|RPS3|RPS29|RPS9|RPS18|RPL7|RPL10A|RPS8|RPL22|RPS14|RPS19|RPS4X|RPL31|RPS17|RPL26|RPLP0|RPL19|RPL21|RPS16|RPL18|RPL23|RPS7|RPS2|RPL15|RPSA|RPS5|RPS6|RPS11	39	0.6910299003322259	GO_INTERSPECIES_INTERACTION_BETWEEN_ORGANISMS (Geneset_Overlap_Data Set 1) GO_NCRNA_METABOLIC_PROCESS	false	Geneset_Overlap	GO_INTERSPECIES_INTERACTION_BETWEEN_ORGANISMS (Geneset_Overlap_Data Set 1) GO_NCRNA_METABOLIC_PROCESS
RPLP2|RPS13|RPS15A|RPL12|RPS23|RPS12|RPS25|RPL27|RPS3A|RPL11|RPL13A|RPL6|RPS3|RPS29|RPS9|RPS18|RPL7|RPL10A|RPS8|RPL22|RPS14|RPS19|RPS4X|RPL31|RPS17|RPL26|RPLP0|RPL19|RPL21|RPS16|RPL18|RPL23|RPS7|RPS2|RPL15|RPSA|RPS5|RPS6|RPS11	39	0.7196428571428571	GO_INTERSPECIES_INTERACTION_BETWEEN_ORGANISMS (Geneset_Overlap_Data Set 1) GO_RIBOSOMAL_SUBUNIT	false	Geneset_Overlap	GO_INTERSPECIES_INTERACTION_BETWEEN_ORGANISMS (Geneset_Overlap_Data Set 1) GO_RIBOSOMAL_SUBUNIT
RPLP2|RPL12|RPL27|RPL11|RPL13A|RPL6|RPL7|RPL10A|RPL22|RPL31|RPL26|RPLP0|RPL19|RPL21|RPL18|RPL23|RPL15	17	0.6024096385542168	GO_INTERSPECIES_INTERACTION_BETWEEN_ORGANISMS (Geneset_Overlap_Data Set 1) GO_LARGE_RIBOSOMAL_SUBUNIT	false	Geneset_Overlap	GO_INTERSPECIES_INTERACTION_BETWEEN_ORGANISMS (Geneset_Overlap_Data Set 1) GO_LARGE_RIBOSOMAL_SUBUNIT
RPLP2|RPS13|RPS15A|VCP|RPL12|RPS23|RPS12|RPS25|RPL27|RPS3A|RAB7A|RPL11|PSMB5|KPNB1|RPL13A|RPL6|RPS3|RPS29|PSMB6|RPS9|RPS18|RPL7|RPL10A|RPS8|RPL22|RPS14|RPS19|RPS4X|RPL31|RPS17|RPL26|RPLP0|RPL19|RPL21|RPS16|PSMB4|RPL18|RPL23|CTSB|RPS7|APOE|RPS2|RPL15|RPSA|RPS5|RPS6|RPS11	47	0.6103896103896104	GO_INTERSPECIES_INTERACTION_BETWEEN_ORGANISMS (Geneset_Overlap_Data Set 1) GO_MACROMOLECULE_CATABOLIC_PROCESS	false	Geneset_Overlap	GO_INTERSPECIES_INTERACTION_BETWEEN_ORGANISMS (Geneset_Overlap_Data Set 1) GO_MACROMOLECULE_CATABOLIC_PROCESS
RPLP2|RPS13|RPS15A|RPL12|RPS23|RPS12|RPS25|RPL27|RPS3A|RPL11|RPL13A|RPL6|RPS3|RPS29|RPS9|RPS18|RPL7|RPL10A|RPS8|RPL22|RPS14|RPS19|RPS4X|RPL31|RPS17|RPL26|RPLP0|RPL19|RPL21|RPS16|RPL18|RPL23|RPS7|RPS2|RPL15|RPSA|RPS5|RPS6|RPS11	39	0.7349397590361446	GO_INTERSPECIES_INTERACTION_BETWEEN_ORGANISMS (Geneset_Overlap_Data Set 1) GO_ESTABLISHMENT_OF_PROTEIN_LOCALIZATION_TO_ENDOPLASMIC_RETICULUM	false	Geneset_Overlap	GO_INTERSPECIES_INTERACTION_BETWEEN_ORGANISMS (Geneset_Overlap_Data Set 1) GO_ESTABLISHMENT_OF_PROTEIN_LOCALIZATION_TO_ENDOPLASMIC_RETICULUM
RPLP2|RPS13|RPS15A|RPL12|RPS23|RPS12|RPS25|RPL27|RPS3A|RPL11|RPL13A|RPL6|RPS3|RPS29|RPS9|RPS18|RPL7|RPL10A|RPS8|RPL22|RPS14|RPS19|RPS4X|RPL31|RPS17|RPL26|RPLP0|RPL19|RPL21|HNRNPA1|RPS16|RPL18|RPL23|C1QBP|SYNCRIP|RPS7|HSPA8|HNRNPK|RPS2|RPL15|RPSA|RPS5|RPS6|RPS11	44	0.6542247744052503	GO_INTERSPECIES_INTERACTION_BETWEEN_ORGANISMS (Geneset_Overlap_Data Set 1) GO_MRNA_METABOLIC_PROCESS	false	Geneset_Overlap	GO_INTERSPECIES_INTERACTION_BETWEEN_ORGANISMS (Geneset_Overlap_Data Set 1) GO_MRNA_METABOLIC_PROCESS
RPLP2|RPS13|RPS15A|RPL12|RPS23|RPS12|RPS25|RPL27|RPS3A|RPL11|RPL13A|RPL6|RPS3|RPS29|RPS9|RPS18|RPL7|RPL10A|RPS8|RPL22|RPS14|RPS19|RPS4X|RPL31|RPS17|RPL26|RPLP0|RPL19|RPL21|RPS16|RPL18|RPL23|RPS7|APOE|RPS2|RPL15|RPSA|RPS5|RPS6|RPS11	40	0.5677179962894249	GO_INTERSPECIES_INTERACTION_BETWEEN_ORGANISMS (Geneset_Overlap_Data Set 1) GO_PROTEIN_LOCALIZATION_TO_MEMBRANE	false	Geneset_Overlap	GO_INTERSPECIES_INTERACTION_BETWEEN_ORGANISMS (Geneset_Overlap_Data Set 1) GO_PROTEIN_LOCALIZATION_TO_MEMBRANE
RPLP2|RPS13|RPS15A|RPL12|RPS23|RPS12|RPS25|RPL27|RPS3A|RPL11|RPL13A|RPL6|RPS3|RPS29|RPS9|RPS18|RPL7|RPL10A|RPS8|RPL22|RPS14|RPS19|RPS4X|RPL31|RPS17|RPL26|RPLP0|RPL19|RPL21|RPS16|RPL18|RPL23|RPS7|RPS2|RPL15|RPSA|RPS5|RPS6|RPS11	39	0.6910299003322259	GO_INTERSPECIES_INTERACTION_BETWEEN_ORGANISMS (Geneset_Overlap_Data Set 1) GO_RNA_CATABOLIC_PROCESS	false	Geneset_Overlap	GO_INTERSPECIES_INTERACTION_BETWEEN_ORGANISMS (Geneset_Overlap_Data Set 1) GO_RNA_CATABOLIC_PROCESS
NPM1|RAN|RPLP2|RPS13|RPS15A|RPL12|RPS23|RPS12|RPS25|RPL27|RPS3A|RPL11|RPL13A|RPL6|RPS3|RPS29|RPS9|RPS18|RPL7|RPL10A|RPS8|RPL22|RPS14|RPS19|XPO1|RPS4X|RPL31|RPS17|RPL26|RPLP0|RPL19|RPL21|RPS16|RPL18|RPL23|C1QBP|RPS7|RPS2|RPL15|EIF3A|RPSA|RPS5|RPS6|RPS11	44	0.7370843989769822	GO_INTERSPECIES_INTERACTION_BETWEEN_ORGANISMS (Geneset_Overlap_Data Set 1) GO_RIBONUCLEOPROTEIN_COMPLEX_BIOGENESIS	false	Geneset_Overlap	GO_INTERSPECIES_INTERACTION_BETWEEN_ORGANISMS (Geneset_Overlap_Data Set 1) GO_RIBONUCLEOPROTEIN_COMPLEX_BIOGENESIS
RPLP2|RPS13|RPS15A|RPL12|RPS23|RPS12|RPS25|RPL27|RPS3A|RPL11|RPL13A|RPL6|RPS3|RPS29|SLC25A4|RPS9|RPS18|RPL7|RPL10A|RPS8|RPL22|RPS14|RPS19|RPS4X|RPL31|RPS17|RPL26|RPLP0|RPL19|RPL21|RPS16|RPL18|RPL23|RPS7|RPS2|RPL15|EIF3A|RPSA|RPS5|RPS6|RPS11	41	0.5752551020408163	GO_INTERSPECIES_INTERACTION_BETWEEN_ORGANISMS (Geneset_Overlap_Data Set 1) GO_PEPTIDE_METABOLIC_PROCESS	false	Geneset_Overlap	GO_INTERSPECIES_INTERACTION_BETWEEN_ORGANISMS (Geneset_Overlap_Data Set 1) GO_PEPTIDE_METABOLIC_PROCESS
RPLP2|RPS13|RPS15A|RPL12|RPS23|RPS12|RPL27|RPS3A|RPL11|RPL13A|RPL6|RPS3|RPS29|SLC25A4|RPS9|RPS18|RPL7|RPL10A|RPS8|RPL22|RPS14|RPS19|RPS4X|RPL31|RPS17|RPL26|RPLP0|RPL19|RPL21|RPS16|RPL18|RPL23|RPS7|RPS2|RPL15|RPSA|RPS5|RPS6|RPS11	39	0.7050215208034433	GO_INTERSPECIES_INTERACTION_BETWEEN_ORGANISMS (Geneset_Overlap_Data Set 1) GO_STRUCTURAL_CONSTITUENT_OF_RIBOSOME	false	Geneset_Overlap	GO_INTERSPECIES_INTERACTION_BETWEEN_ORGANISMS (Geneset_Overlap_Data Set 1) GO_STRUCTURAL_CONSTITUENT_OF_RIBOSOME
RPLP2|RPS13|RPS15A|RPL12|RPS23|RPS12|RPS25|RPL27|RPS3A|RPL11|PC|RPL13A|RPL6|RPS3|RPS29|SLC25A4|RPS9|RPS18|RPL7|RPL10A|RPS8|RPL22|RPS14|RPS19|RPS4X|RPL31|RPS17|RPL26|RPLP0|RPL19|RPL21|RPS16|RPL18|RPL23|RPS7|RPS2|RPL15|EIF3A|RPSA|RPS5|RPS6|RPS11	42	0.5579207920792079	GO_INTERSPECIES_INTERACTION_BETWEEN_ORGANISMS (Geneset_Overlap_Data Set 1) GO_CELLULAR_AMIDE_METABOLIC_PROCESS	false	Geneset_Overlap	GO_INTERSPECIES_INTERACTION_BETWEEN_ORGANISMS (Geneset_Overlap_Data Set 1) GO_CELLULAR_AMIDE_METABOLIC_PROCESS
RPLP2|RPS13|RPS15A|RPL12|RPS23|RPS12|RPS25|RPL27|RPS3A|RPL11|RPL13A|RPL6|RPS3|RPS29|RPS9|RPS18|RPL7|RPL10A|RPS8|RPL22|RPS14|RPS19|RPS4X|RPL31|RPS17|RPL26|RPLP0|RPL19|RPL21|RPS16|RPL18|RPL23|RPS7|RPS2|RPL15|RPSA|RPS5|RPS6|RPS11	39	0.7196428571428571	GO_INTERSPECIES_INTERACTION_BETWEEN_ORGANISMS (Geneset_Overlap_Data Set 1) GO_NUCLEAR_TRANSCRIBED_MRNA_CATABOLIC_PROCESS_NONSENSE_MEDIATED_DECAY	false	Geneset_Overlap	GO_INTERSPECIES_INTERACTION_BETWEEN_ORGANISMS (Geneset_Overlap_Data Set 1) GO_NUCLEAR_TRANSCRIBED_MRNA_CATABOLIC_PROCESS_NONSENSE_MEDIATED_DECAY
DYNLL1|NPM1|RAN|RPLP2|RPS13|DYNLT1|RPS15A|VCP|RPL12|RPS23|RPS12|RPS25|RPL27|RPS3A|RAB7A|RPL11|KPNB1|RPL13A|RPL6|RPS3|RPS29|SCARB2|RPS9|RPS18|RPL7|RPL10A|RPS8|RPL22|RPS14|RPS19|XPO1|RPS4X|RALA|RPL31|RPS17|RPL26|RPLP0|RPL19|RPL21|YWHAE|RPS16|RPL18|RPL23|RPS7|YWHAB|HSPA8|ITGB1|RPS2|RPL15|RPSA|RPS5|RPS6|RPS11	53	0.5597778745644599	GO_INTERSPECIES_INTERACTION_BETWEEN_ORGANISMS (Geneset_Overlap_Data Set 1) GO_INTRACELLULAR_PROTEIN_TRANSPORT	false	Geneset_Overlap	GO_INTERSPECIES_INTERACTION_BETWEEN_ORGANISMS (Geneset_Overlap_Data Set 1) GO_INTRACELLULAR_PROTEIN_TRANSPORT
RPLP2|RPS13|RPS15A|RPL12|RPS23|RPS12|RPS25|RPL27|RPS3A|RPL11|RPL13A|RPL6|RPS3|RPS29|RPS9|RPS18|RPL7|RPL10A|RPS8|RPL22|RPS14|RPS19|RPS4X|RPL31|RPS17|RPL26|RPLP0|TCP1|RPL19|RPL21|RPS16|RPL18|RPL23|RPS7|RPS2|RPL15|RPSA|RPS5|RPS6|RPS11	40	0.6049228201919066	GO_INTERSPECIES_INTERACTION_BETWEEN_ORGANISMS (Geneset_Overlap_Data Set 1) GO_CYTOSOLIC_PART	false	Geneset_Overlap	GO_INTERSPECIES_INTERACTION_BETWEEN_ORGANISMS (Geneset_Overlap_Data Set 1) GO_CYTOSOLIC_PART
RAN|RPLP2|RPS13|RPS15A|RPL12|RPS23|RPS12|RPS25|RPL27|RPS3A|RAB7A|RPL11|KPNB1|RPL13A|RPL6|RPS3|RPS29|SCARB2|RPS9|RPS18|RPL7|RPL10A|RPS8|RPL22|RPS14|RPS19|RPS4X|RPL31|RPS17|RPL26|RPLP0|RPL19|RPL21|YWHAE|RPS16|RPL18|RPL23|RPS7|YWHAB|HSPA8|RPS2|RPL15|RPSA|RPS5|RPS6|RPS11	46	0.6681818181818182	GO_INTERSPECIES_INTERACTION_BETWEEN_ORGANISMS (Geneset_Overlap_Data Set 1) GO_PROTEIN_TARGETING	false	Geneset_Overlap	GO_INTERSPECIES_INTERACTION_BETWEEN_ORGANISMS (Geneset_Overlap_Data Set 1) GO_PROTEIN_TARGETING
RPLP2|RPS13|RPS15A|RPL12|RPS23|RPS12|RPS25|RPL27|RPS3A|RPL11|RPL13A|RPL6|RPS3|RPS29|SLC25A4|RPS9|RPS18|RPL7|RPL10A|RPS8|RPL22|RPS14|RPS19|RPS4X|RPL31|RPS17|RPL26|RPLP0|RPL19|RPL21|RPS16|RPL18|RPL23|RPS7|RPS2|RPL15|EIF3A|RPSA|RPS5|RPS6|RPS11	41	0.6223908918406073	GO_INTERSPECIES_INTERACTION_BETWEEN_ORGANISMS (Geneset_Overlap_Data Set 1) GO_AMIDE_BIOSYNTHETIC_PROCESS	false	Geneset_Overlap	GO_INTERSPECIES_INTERACTION_BETWEEN_ORGANISMS (Geneset_Overlap_Data Set 1) GO_AMIDE_BIOSYNTHETIC_PROCESS
SNCB|ERC1|STX1B|HSPA8|SNCA|VDAC2|SV2A|PFN2|RAB11B|CALB1|SYN1|CADPS|VDAC1|SYT1|STX1A|VAMP2|STXBP1|RAB7A	18	0.7045454545454546	GO_PRESYNAPSE (Geneset_Overlap_Data Set 1) GO_SYNAPSE	false	Geneset_Overlap	GO_PRESYNAPSE (Geneset_Overlap_Data Set 1) GO_SYNAPSE
SNCB|SNCA|SV2A|PFN2|CALB1|SYN1|SYT1|STX1A|VAMP2|STXBP1|RAB7A	11	0.38302034428794995	GO_PRESYNAPSE (Geneset_Overlap_Data Set 1) GO_NEURON_PROJECTION	false	Geneset_Overlap	GO_PRESYNAPSE (Geneset_Overlap_Data Set 1) GO_NEURON_PROJECTION
SNCB|ERC1|STX1B|HSPA8|SNCA|VDAC2|SV2A|PFN2|RAB11B|CALB1|SYN1|CADPS|VDAC1|SYT1|STX1A|VAMP2|STXBP1|RAB7A	18	0.618421052631579	GO_PRESYNAPSE (Geneset_Overlap_Data Set 1) GO_NEURON_PART	false	Geneset_Overlap	GO_PRESYNAPSE (Geneset_Overlap_Data Set 1) GO_NEURON_PART
SNCB|ERC1|STX1B|HSPA8|SNCA|VDAC2|SV2A|PFN2|RAB11B|CALB1|SYN1|CADPS|VDAC1|SYT1|STX1A|VAMP2|STXBP1|RAB7A	18	0.75	GO_PRESYNAPSE (Geneset_Overlap_Data Set 1) GO_SYNAPSE_PART	false	Geneset_Overlap	GO_PRESYNAPSE (Geneset_Overlap_Data Set 1) GO_SYNAPSE_PART
SNCB|STX1B|HSPA8|SNCA|SYN1|CADPS|VDAC1|SYT1|STX1A|VAMP2|STXBP1	11	0.4952107279693487	GO_PRESYNAPSE (Geneset_Overlap_Data Set 1) GO_SYNAPTIC_SIGNALING	false	Geneset_Overlap	GO_PRESYNAPSE (Geneset_Overlap_Data Set 1) GO_SYNAPTIC_SIGNALING
RPL23|RPS7|RPS2|RPL15|RPSA|RPS5|RPS6|RPS11|RPL26|RPS17|RPLP0|RPL21|RPL19|RPS16|RPL18|RPS29|RPS3|RPS9|EIF5A|RPL7|RPS18|RPL10A|RPS8|RPL22|RPS14|RPS19|RPS4X|RPL31|RPLP2|RPS13|RPS15A|RPL12|RPS23|RPS12|RPS25|RPL27|RPS3A|RPL11|RPL13A|RPL6	40	0.5612244897959184	GO_INTRACELLULAR_PROTEIN_TRANSPORT (Geneset_Overlap_Data Set 1) GO_PEPTIDE_METABOLIC_PROCESS	false	Geneset_Overlap	GO_INTRACELLULAR_PROTEIN_TRANSPORT (Geneset_Overlap_Data Set 1) GO_PEPTIDE_METABOLIC_PROCESS
RPL23|RPS7|RPS2|RPL15|RPSA|RPS5|RPS6|RPS11|RPL26|RPS17|RPLP0|RPL21|RPL19|RPS16|RPL18|RPS29|RPS3|RPS9|RPL7|RPS18|RPL10A|RPS8|RPL22|RPS14|RPS19|RPS4X|RPL31|RPLP2|RPS13|RPS15A|RPL12|RPS23|RPS12|RPL27|RPS3A|RPL11|RPL13A|RPL6	38	0.6869440459110474	GO_INTRACELLULAR_PROTEIN_TRANSPORT (Geneset_Overlap_Data Set 1) GO_STRUCTURAL_CONSTITUENT_OF_RIBOSOME	false	Geneset_Overlap	GO_INTRACELLULAR_PROTEIN_TRANSPORT (Geneset_Overlap_Data Set 1) GO_STRUCTURAL_CONSTITUENT_OF_RIBOSOME
RPL23|RPL15|RPL26|RPLP0|RPL21|RPL19|RPL18|RPL7|RPL10A|RPL22|RPL31|RPLP2|RPL12|RPL27|RPL11|RPL13A|RPL6	17	0.6036585365853658	GO_INTRACELLULAR_PROTEIN_TRANSPORT (Geneset_Overlap_Data Set 1) GO_LARGE_RIBOSOMAL_SUBUNIT	false	Geneset_Overlap	GO_INTRACELLULAR_PROTEIN_TRANSPORT (Geneset_Overlap_Data Set 1) GO_LARGE_RIBOSOMAL_SUBUNIT
RPL23|RPS7|RPS2|RPL15|RPSA|RPS5|RPS6|RPS11|RPL26|RPS17|RPLP0|RPL21|RPL19|CTNNB1|HSP90B1|RPS16|RPL18|RPS29|RPS3|RPS9|RPL7|RPS18|RPL10A|RPS8|RPL22|RPS14|RPS19|RPS4X|RPL31|RPLP2|RPS13|RPS15A|VCP|RPL12|RPS23|RPS12|RPS25|RPL27|RPS3A|RAB7A|RPL11|KPNB1|RPL13A|RPL6	44	0.567028131384567	GO_INTRACELLULAR_PROTEIN_TRANSPORT (Geneset_Overlap_Data Set 1) GO_MACROMOLECULE_CATABOLIC_PROCESS	false	Geneset_Overlap	GO_INTRACELLULAR_PROTEIN_TRANSPORT (Geneset_Overlap_Data Set 1) GO_MACROMOLECULE_CATABOLIC_PROCESS
RPL23|RPS7|RPS2|RPL15|RPSA|RPS5|RPS6|RPS11|RPL26|RPS17|RPLP0|RPL21|RPL19|RPS16|RPL18|RPS29|RPS3|RPS9|EIF5A|RPL7|RPS18|RPL10A|RPS8|RPL22|RPS14|RPS19|RPS4X|RPL31|RPLP2|RPS13|RPS15A|RPL12|RPS23|RPS12|RPS25|RPL27|RPS3A|RPL11|RPL13A|RPL6	40	0.5294117647058824	GO_INTRACELLULAR_PROTEIN_TRANSPORT (Geneset_Overlap_Data Set 1) GO_CELLULAR_AMIDE_METABOLIC_PROCESS	false	Geneset_Overlap	GO_INTRACELLULAR_PROTEIN_TRANSPORT (Geneset_Overlap_Data Set 1) GO_CELLULAR_AMIDE_METABOLIC_PROCESS
RPL23|RPS7|RPS2|RPL15|RPSA|RPS5|RPS6|RPS11|RPL26|RPS17|RPLP0|RPL21|RPL19|RPS16|RPL18|RPS29|RPS3|RPS9|RPL7|RPS18|RPL10A|RPS8|RPL22|RPS14|RPS19|RPS4X|RPL31|RPLP2|RPS13|RPS15A|RPL12|RPS23|RPS12|RPS25|RPL27|RPS3A|RPL11|RPL13A|RPL6	39	0.7224397590361445	GO_INTRACELLULAR_PROTEIN_TRANSPORT (Geneset_Overlap_Data Set 1) GO_MULTI_ORGANISM_METABOLIC_PROCESS	false	Geneset_Overlap	GO_INTRACELLULAR_PROTEIN_TRANSPORT (Geneset_Overlap_Data Set 1) GO_MULTI_ORGANISM_METABOLIC_PROCESS
RPL23|RPS7|ANXA2|RPS2|RPL15|RPSA|RPS5|RPS6|RPS11|RPL26|RPS17|RPLP0|RPL21|RPL19|RPS16|RPL18|RPS29|RPS3|RPS9|RPL7|RPS18|RPL10A|RPS8|RPL22|RPS14|RPS19|RPS4X|RPL31|RPLP2|RPS13|RPS15A|RPL12|RPS23|RPS12|RPS25|RPL27|SSR1|RPS3A|RPL11|RPL13A|RPL6	41	0.75	GO_INTRACELLULAR_PROTEIN_TRANSPORT (Geneset_Overlap_Data Set 1) GO_PROTEIN_TARGETING_TO_MEMBRANE	false	Geneset_Overlap	GO_INTRACELLULAR_PROTEIN_TRANSPORT (Geneset_Overlap_Data Set 1) GO_PROTEIN_TARGETING_TO_MEMBRANE
RPL23|RPS7|RPS2|RPL15|RPSA|RPS5|RPS6|RPS11|RPL26|RPS17|RPLP0|RPL21|RPL19|RPS16|RPL18|RPS29|RPS3|RPS9|EIF5A|RPL7|RPS18|RPL10A|RPS8|RPL22|RPS14|RPS19|RPS4X|RPL31|RPLP2|RPS13|RPS15A|RPL12|RPS23|RPS12|RPS25|RPL27|RPS3A|RPL11|RPL13A|RPL6	40	0.423076923076923	GO_INTRACELLULAR_PROTEIN_TRANSPORT (Geneset_Overlap_Data Set 1) GO_ORGANONITROGEN_COMPOUND_BIOSYNTHETIC_PROCESS	false	Geneset_Overlap	GO_INTRACELLULAR_PROTEIN_TRANSPORT (Geneset_Overlap_Data Set 1) GO_ORGANONITROGEN_COMPOUND_BIOSYNTHETIC_PROCESS
RPL23|RPS7|TOMM22|ANXA2|RPS2|RPL15|RPSA|RPS5|RPS6|RPS11|RPL26|RPS17|RPLP0|ATP1B1|RPL21|RPL19|RAB31|HSPA4|HSP90AA1|RPS16|RPL18|RPS29|RPS3|RPS9|RPL7|RPS18|RPL10A|RPS8|RPL22|RPS14|RPS19|RPS4X|RAB11B|RPL31|RPLP2|RPS13|RPS15A|RPL12|RPS23|RPS12|RPS25|RPL27|VAMP2|SSR1|NSF|RPS3A|RPL11|RPL13A|RPL6	49	0.7238636363636364	GO_INTRACELLULAR_PROTEIN_TRANSPORT (Geneset_Overlap_Data Set 1) GO_PROTEIN_LOCALIZATION_TO_MEMBRANE	false	Geneset_Overlap	GO_INTRACELLULAR_PROTEIN_TRANSPORT (Geneset_Overlap_Data Set 1) GO_PROTEIN_LOCALIZATION_TO_MEMBRANE
RPL23|RPS7|RPS2|RPL15|RPSA|RPS5|RPS6|RPS11|RPL26|RPS17|RPLP0|RPL21|RPL19|RPS16|RPL18|RPS29|RPS3|RPS9|RPL7|RPS18|RPL10A|RPS8|RPL22|RPS14|RPS19|RPS4X|RPL31|RPLP2|RPS13|RPS15A|RPL12|RPS23|RPS12|RPS25|RPL27|RPS3A|RPL11|RPL13A|RPL6	39	0.7378048780487805	GO_INTRACELLULAR_PROTEIN_TRANSPORT (Geneset_Overlap_Data Set 1) GO_ESTABLISHMENT_OF_PROTEIN_LOCALIZATION_TO_ENDOPLASMIC_RETICULUM	false	Geneset_Overlap	GO_INTRACELLULAR_PROTEIN_TRANSPORT (Geneset_Overlap_Data Set 1) GO_ESTABLISHMENT_OF_PROTEIN_LOCALIZATION_TO_ENDOPLASMIC_RETICULUM
RPL23|RPS7|HSPA8|RPS2|RPL15|RPSA|RPS5|RPS6|RPS11|RPL26|RPS17|RPLP0|RPL21|RPL19|RPS16|RPL18|RPS29|RPS3|RPS9|RPL7|RPS18|RPL10A|RPS8|RPL22|RPS14|RPS19|RPS4X|RPL31|RPLP2|RPS13|RPS15A|RPL12|RPS23|RPS12|RPS25|RPL27|RPS3A|RPL11|RPL13A|RPL6	40	0.5878848063555114	GO_INTRACELLULAR_PROTEIN_TRANSPORT (Geneset_Overlap_Data Set 1) GO_MRNA_METABOLIC_PROCESS	false	Geneset_Overlap	GO_INTRACELLULAR_PROTEIN_TRANSPORT (Geneset_Overlap_Data Set 1) GO_MRNA_METABOLIC_PROCESS
RPL23|RPS7|RPS2|RPL15|RPSA|RPS5|RPS6|RPS11|RPL26|RPS17|RPLP0|RPL21|RPL19|RPS16|RPL18|RPS29|RPS3|RPS9|RPL7|RPS18|RPL10A|RPS8|RPL22|RPS14|RPS19|RPS4X|XPO1|RPL31|RAN|NPM1|RPLP2|RPS13|RPS15A|RPL12|RPS23|RPS12|RPS25|RPL27|RPS3A|RPL11|RPL13A|RPL6	42	0.7007077856420627	GO_INTRACELLULAR_PROTEIN_TRANSPORT (Geneset_Overlap_Data Set 1) GO_RIBONUCLEOPROTEIN_COMPLEX_BIOGENESIS	false	Geneset_Overlap	GO_INTRACELLULAR_PROTEIN_TRANSPORT (Geneset_Overlap_Data Set 1) GO_RIBONUCLEOPROTEIN_COMPLEX_BIOGENESIS
RPL23|RPS7|RPS2|RPL15|RPSA|RPS5|RPS6|RPS11|RPL26|RPS17|RPLP0|RPL21|RPL19|RPS16|RPL18|RPS29|RPS3|RPS9|EIF5A|RPL7|RPS18|RPL10A|RPS8|RPL22|RPS14|RPS19|RPS4X|RPL31|RPLP2|RPS13|RPS15A|RPL12|RPS23|RPS12|RPS25|RPL27|RPS3A|RPL11|RPL13A|RPL6	40	0.6072106261859582	GO_INTRACELLULAR_PROTEIN_TRANSPORT (Geneset_Overlap_Data Set 1) GO_AMIDE_BIOSYNTHETIC_PROCESS	false	Geneset_Overlap	GO_INTRACELLULAR_PROTEIN_TRANSPORT (Geneset_Overlap_Data Set 1) GO_AMIDE_BIOSYNTHETIC_PROCESS
RPL23|RPS7|HSPA8|RPS2|RPS6|RPS11|RPL21|RPL19|HSPA9|RPL18|RPS3|RPS9|RPL7|RPL10A|RPS14|RPS19|XPO1|RAN|NPM1|RPS13|RPL12|RPS23|RPS25|RPS3A|RPL11|RPL13A	26	0.47017543859649125	GO_INTRACELLULAR_PROTEIN_TRANSPORT (Geneset_Overlap_Data Set 1) GO_NUCLEOLUS	false	Geneset_Overlap	GO_INTRACELLULAR_PROTEIN_TRANSPORT (Geneset_Overlap_Data Set 1) GO_NUCLEOLUS
RPL23|RPS7|RPS2|RPL15|RPSA|RPS5|RPS6|RPS11|RPL26|RPS17|RPLP0|RPL21|RPL19|RPS16|RPL18|RPS29|RPS3|RPS9|RPL7|RPS18|RPL10A|RPS8|RPL22|RPS14|RPS19|RPS4X|RPL31|RPLP2|RPS13|RPS15A|RPL12|RPS23|RPS12|RPS25|RPL27|RPS3A|RPL11|RPL13A|RPL6	39	0.6936974789915966	GO_INTRACELLULAR_PROTEIN_TRANSPORT (Geneset_Overlap_Data Set 1) GO_NCRNA_METABOLIC_PROCESS	false	Geneset_Overlap	GO_INTRACELLULAR_PROTEIN_TRANSPORT (Geneset_Overlap_Data Set 1) GO_NCRNA_METABOLIC_PROCESS
RPL23|RPS7|TOMM22|YWHAB|ANXA2|YWHAG|HSPA8|RPS2|RPL15|RPSA|RPS5|PHB2|RPS6|RPS11|RPL26|RPS17|RPLP0|RPL21|RPL19|CTNNB1|FIS1|HSPA4|YWHAE|HSP90AA1|RPS16|RPL18|RPS29|RPS3|SCARB2|RPS9|RPL7|RPS18|RPL10A|RPS8|RPL22|RPS14|RPS19|RPS4X|RPL31|RAN|RPLP2|RPS13|RPS15A|RPL12|RPS23|RPS12|RPS25|RPL27|SSR1|RPS3A|RAB7A|RPL11|KPNB1|RPL13A|RPL6	55	0.8353658536585367	GO_INTRACELLULAR_PROTEIN_TRANSPORT (Geneset_Overlap_Data Set 1) GO_PROTEIN_TARGETING	false	Geneset_Overlap	GO_INTRACELLULAR_PROTEIN_TRANSPORT (Geneset_Overlap_Data Set 1) GO_PROTEIN_TARGETING
RPL23|RPS7|RPS2|RPL15|RPSA|RPS5|RPS6|RPS11|RPL26|RPS17|RPLP0|RPL21|RPL19|RPS16|RPL18|RPS29|RPS3|RPS9|RPL7|RPS18|RPL10A|RPS8|RPL22|RPS14|RPS19|RPS4X|RPL31|RPLP2|RPS13|RPS15A|RPL12|RPS23|RPS12|RPS25|RPL27|RPS3A|RPL11|RPL13A|RPL6	39	0.7224397590361445	GO_INTRACELLULAR_PROTEIN_TRANSPORT (Geneset_Overlap_Data Set 1) GO_NUCLEAR_TRANSCRIBED_MRNA_CATABOLIC_PROCESS_NONSENSE_MEDIATED_DECAY	false	Geneset_Overlap	GO_INTRACELLULAR_PROTEIN_TRANSPORT (Geneset_Overlap_Data Set 1) GO_NUCLEAR_TRANSCRIBED_MRNA_CATABOLIC_PROCESS_NONSENSE_MEDIATED_DECAY
RPL23|RPS7|RPS2|RPL15|RPSA|RPS5|RPS6|RPS11|RPL26|RPS17|RPLP0|RPL21|RPL19|RPS16|RPL18|RPS29|RPS3|RPS9|RPL7|RPS18|RPL10A|RPS8|RPL22|RPS14|RPS19|RPS4X|RPL31|RPLP2|RPS13|RPS15A|RPL12|RPS23|RPS12|RPS25|RPL27|RPS3A|RPL11|RPL13A|RPL6	39	0.5897997496871088	GO_INTRACELLULAR_PROTEIN_TRANSPORT (Geneset_Overlap_Data Set 1) GO_CYTOSOLIC_PART	false	Geneset_Overlap	GO_INTRACELLULAR_PROTEIN_TRANSPORT (Geneset_Overlap_Data Set 1) GO_CYTOSOLIC_PART
RPL11|RPS16|RPL18|RPL6|RPL13A|RPS12|RPS25|RPL27|RPS3A|RPS15A|RPL12|RPS23|RPL26|RPS17|RPLP0|RPLP2|RPS13|RPL21|RPL19|RPS4X|RPS5|RPS6|RPS11|RPL31|RPS8|RPS2|RPL15|RPL22|RPS14|RPS19|RPSA|RPS9|RPS18|RPL7|RPL10A|RPL23|RPS29|RPS7|RPS3	39	0.9306818181818182	GO_RIBOSOME_BIOGENESIS (Geneset_Overlap_Data Set 1) GO_NUCLEAR_TRANSCRIBED_MRNA_CATABOLIC_PROCESS_NONSENSE_MEDIATED_DECAY	false	Geneset_Overlap	GO_RIBOSOME_BIOGENESIS (Geneset_Overlap_Data Set 1) GO_NUCLEAR_TRANSCRIBED_MRNA_CATABOLIC_PROCESS_NONSENSE_MEDIATED_DECAY
RPL11|RPS16|RPL18|RPL6|RPL13A|RPS12|RPS25|RPL27|RPS3A|RPS15A|RPL12|RPS23|RPL26|RPS17|RPLP0|RPLP2|RPS13|RPL21|RPL19|RPS4X|RPS5|RPS6|RPS11|RPL31|RPS8|RPS2|RPL15|RPL22|RPS14|RPS19|RPSA|RPS9|RPS18|RPL7|RPL10A|RPL23|RPS29|RPS7|RPS3	39	0.7839968466692944	GO_RIBOSOME_BIOGENESIS (Geneset_Overlap_Data Set 1) GO_PROTEIN_LOCALIZATION_TO_MEMBRANE	false	Geneset_Overlap	GO_RIBOSOME_BIOGENESIS (Geneset_Overlap_Data Set 1) GO_PROTEIN_LOCALIZATION_TO_MEMBRANE
RPL11|RPS16|RPL18|RPL6|RPL13A|RPS12|RPS25|RPL27|RPS3A|RPS15A|RPL12|RPS23|RPL26|RPS17|RPLP0|RPLP2|RPS13|RPL21|RPL19|RPS4X|RPS5|RPS6|RPS11|RPL31|RPS8|RPS2|RPL15|RPL22|RPS14|RPS19|RPSA|RPS9|RPS18|RPL7|RPL10A|RPL23|RPS29|RPS7|RPS3	39	0.8881987577639752	GO_RIBOSOME_BIOGENESIS (Geneset_Overlap_Data Set 1) GO_RNA_CATABOLIC_PROCESS	false	Geneset_Overlap	GO_RIBOSOME_BIOGENESIS (Geneset_Overlap_Data Set 1) GO_RNA_CATABOLIC_PROCESS
RPL11|RPS16|RPL18|RPL6|RPL13A|RPS12|RPS25|RPL27|RPS3A|RPS15A|RPL12|RPS23|RPL26|RPS17|RPLP0|RPLP2|RPS13|RPL21|RPL19|RPS4X|RPS5|RPS6|RPS11|RPL31|RPS8|RPS2|RPL15|RPL22|RPS14|RPS19|RPSA|RPS9|RPS18|RPL7|RPL10A|RPL23|RPS29|RPS7|RPS3	39	0.8080338266384778	GO_RIBOSOME_BIOGENESIS (Geneset_Overlap_Data Set 1) GO_CYTOSOLIC_PART	false	Geneset_Overlap	GO_RIBOSOME_BIOGENESIS (Geneset_Overlap_Data Set 1) GO_CYTOSOLIC_PART
RPL11|RPS16|RPL18|RPL6|RPL13A|RPS12|RPS25|RPL27|RPS3A|RPS15A|RPL12|RPS23|RPL26|RPS17|RPLP0|RPLP2|RPS13|RPL21|RPL19|RPS4X|RPS5|RPS6|RPS11|RPL31|RPS8|RPS2|RPL15|RPL22|RPS14|RPS19|RPSA|RPS9|RPS18|RPL7|RPL10A|RPL23|RPS29|RPS7|RPS3	39	0.8080338266384778	GO_RIBOSOME_BIOGENESIS (Geneset_Overlap_Data Set 1) GO_AMIDE_BIOSYNTHETIC_PROCESS	false	Geneset_Overlap	GO_RIBOSOME_BIOGENESIS (Geneset_Overlap_Data Set 1) GO_AMIDE_BIOSYNTHETIC_PROCESS
RPL11|RPS16|RPL18|RPL6|RPL13A|RPS12|RPS25|RPL27|RPS3A|RPS15A|RPL12|RPS23|RPL26|RPS17|RPLP0|RPLP2|RPS13|RPL21|RPL19|RPS4X|RPS5|RPS6|RPS11|RPL31|RPS8|RPS2|RPL15|RPL22|RPS14|RPS19|RPSA|RPS9|RPS18|RPL7|RPL10A|RPL23|RPS29|RPS7|RPS3	39	0.6357313627472289	GO_RIBOSOME_BIOGENESIS (Geneset_Overlap_Data Set 1) GO_CELLULAR_CATABOLIC_PROCESS	false	Geneset_Overlap	GO_RIBOSOME_BIOGENESIS (Geneset_Overlap_Data Set 1) GO_CELLULAR_CATABOLIC_PROCESS
RPL11|RPS16|RPL18|RPL6|RPL13A|RPS12|RPS25|RPL27|RPS3A|RPS15A|RPL12|RPS23|RPL26|RPS17|RPLP0|RPLP2|RPS13|RPL21|RPL19|RPS4X|RPS5|RPS6|RPS11|RPL31|RPS8|RPS2|RPL15|RPL22|RPS14|RPS19|RPSA|RPS9|RPS18|RPL7|RPL10A|RPL23|RPS29|RPS7|RPS3	39	0.8683819891142999	GO_RIBOSOME_BIOGENESIS (Geneset_Overlap_Data Set 1) GO_RIBOSOME	false	Geneset_Overlap	GO_RIBOSOME_BIOGENESIS (Geneset_Overlap_Data Set 1) GO_RIBOSOME
RPL11|RPS16|RPL18|RPL6|RPL13A|RPS12|RPS25|RPL27|RPS3A|RPS15A|RPL12|RPS23|RAN|NPM1|RPL26|RPS17|RPLP0|RPLP2|RPS13|RPL21|RPL19|RPS4X|XPO1|RPS5|RPS6|RPS11|RPL31|RPS8|RPS2|RPL15|RPL22|RPS14|RPS19|RPSA|RPS9|RPS18|RPL7|RPL10A|RPL23|RPS29|RPS7|RPS3	42	0.7413841412160269	GO_RIBOSOME_BIOGENESIS (Geneset_Overlap_Data Set 1) GO_INTRACELLULAR_PROTEIN_TRANSPORT	false	Geneset_Overlap	GO_RIBOSOME_BIOGENESIS (Geneset_Overlap_Data Set 1) GO_INTRACELLULAR_PROTEIN_TRANSPORT
RPL11|RPS16|RPL18|RPL6|RPL13A|RPS12|RPS25|RPL27|RPS3A|RPS15A|RPL12|RPS23|RPL26|RPS17|RPLP0|RPLP2|RPS13|RPL21|RPL19|RPS4X|RPS5|RPS6|RPS11|RPL31|RPS8|RPS2|RPL15|RPL22|RPS14|RPS19|RPSA|RPS9|RPS18|RPL7|RPL10A|RPL23|RPS29|RPS7|RPS3	39	0.8145994832041343	GO_RIBOSOME_BIOGENESIS (Geneset_Overlap_Data Set 1) GO_ESTABLISHMENT_OF_PROTEIN_LOCALIZATION_TO_MEMBRANE	false	Geneset_Overlap	GO_RIBOSOME_BIOGENESIS (Geneset_Overlap_Data Set 1) GO_ESTABLISHMENT_OF_PROTEIN_LOCALIZATION_TO_MEMBRANE
RPL11|RPS16|RPL18|RPL6|RPL13A|RPS12|RPS25|RPL27|RPS3A|RPS15A|RPL12|RPS23|RPL26|RPS17|RPLP0|RPLP2|RPS13|RPL21|RPL19|RPS4X|RPS5|RPS6|RPS11|RPL31|RPS8|RPS2|RPL15|RPL22|RPS14|RPS19|RPSA|RPS9|RPS18|RPL7|RPL10A|RPL23|RPS29|RPS7|RPS3	39	0.9089430894308943	GO_RIBOSOME_BIOGENESIS (Geneset_Overlap_Data Set 1) GO_NCRNA_PROCESSING	false	Geneset_Overlap	GO_RIBOSOME_BIOGENESIS (Geneset_Overlap_Data Set 1) GO_NCRNA_PROCESSING
RPL11|RPS16|RPL18|RPL6|RPL13A|RPS12|RPS25|RPL27|RPS3A|RPS15A|RPL12|RPS23|RAN|RPL26|RPS17|RPLP0|RPLP2|RPS13|RPL21|RPL19|RPS4X|RPS5|RPS6|RPS11|RPL31|RPS8|RPS2|RPL15|RPL22|RPS14|RPS19|RPSA|RPS9|RPS18|RPL7|RPL10A|RPL23|RPS29|RPS7|RPS3	40	0.809943865276664	GO_RIBOSOME_BIOGENESIS (Geneset_Overlap_Data Set 1) GO_PROTEIN_TARGETING	false	Geneset_Overlap	GO_RIBOSOME_BIOGENESIS (Geneset_Overlap_Data Set 1) GO_PROTEIN_TARGETING
RPL11|RPS16|RPL18|RPL6|RPL13A|RPS12|RPS25|RPL27|RPS3A|RPS15A|RPL12|RPS23|RPL26|RPS17|RPLP0|RPLP2|RPS13|RPL21|RPL19|RPS4X|RPS5|RPS6|RPS11|RPL31|RPS8|RPS2|RPL15|RPL22|RPS14|RPS19|RPSA|RPS9|RPS18|RPL7|RPL10A|RPL23|RPS29|RPS7|RPS3	39	0.6912932501418037	GO_RIBOSOME_BIOGENESIS (Geneset_Overlap_Data Set 1) GO_ORGANONITROGEN_COMPOUND_BIOSYNTHETIC_PROCESS	false	Geneset_Overlap	GO_RIBOSOME_BIOGENESIS (Geneset_Overlap_Data Set 1) GO_ORGANONITROGEN_COMPOUND_BIOSYNTHETIC_PROCESS
RPL11|RPS16|RPL18|RPL6|RPL13A|RPS12|RPS25|RPL27|RPS3A|RPS15A|RPL12|RPS23|RPL26|RPS17|RPLP0|RPLP2|RPS13|RPL21|RPL19|RPS4X|RPS5|RPS6|RPS11|RPL31|RPS8|RPS2|RPL15|RPL22|RPS14|RPS19|RPSA|RPS9|RPS18|RPL7|RPL10A|RPL23|RPS29|RPS7|RPS3	39	0.9089430894308943	GO_RIBOSOME_BIOGENESIS (Geneset_Overlap_Data Set 1) GO_PROTEIN_TARGETING_TO_MEMBRANE	false	Geneset_Overlap	GO_RIBOSOME_BIOGENESIS (Geneset_Overlap_Data Set 1) GO_PROTEIN_TARGETING_TO_MEMBRANE
RPL11|RPS16|RPL18|RPL6|RPL13A|RPS12|RPL27|RPS3A|RPS15A|RPL12|RPS23|RPL26|RPS17|RPLP0|RPLP2|RPS13|RPL21|RPL19|RPS4X|RPS5|RPS6|RPS11|RPL31|RPS8|RPS2|RPL15|RPL22|RPS14|RPS19|RPSA|RPS9|RPS18|RPL7|RPL10A|RPL23|RPS29|RPS7|RPS3	38	0.876458112407211	GO_RIBOSOME_BIOGENESIS (Geneset_Overlap_Data Set 1) GO_STRUCTURAL_CONSTITUENT_OF_RIBOSOME	false	Geneset_Overlap	GO_RIBOSOME_BIOGENESIS (Geneset_Overlap_Data Set 1) GO_STRUCTURAL_CONSTITUENT_OF_RIBOSOME
RPL11|RPS16|RPL18|RPL6|RPL13A|RPS12|RPS25|RPL27|RPS3A|RPS15A|RPL12|RPS23|RAN|NPM1|RPL26|RPS17|RPLP0|RPLP2|RPS13|RPL21|RPL19|RPS4X|XPO1|RPS5|RPS6|RPS11|RPL31|RPS8|RPS2|RPL15|RPL22|RPS14|RPS19|RPSA|RPS9|RPS18|RPL7|RPL10A|C1QBP|RPL23|RPS29|RPS7|RPS3	43	0.7590361445783133	GO_RIBOSOME_BIOGENESIS (Geneset_Overlap_Data Set 1) GO_INTERSPECIES_INTERACTION_BETWEEN_ORGANISMS	false	Geneset_Overlap	GO_RIBOSOME_BIOGENESIS (Geneset_Overlap_Data Set 1) GO_INTERSPECIES_INTERACTION_BETWEEN_ORGANISMS
RPL11|RPS16|RPL18|RPL6|RPL13A|RPS12|RPS25|RPL27|RPS3A|RPS15A|RPL12|RPS23|RPL26|RPS17|RPLP0|RPLP2|RPS13|RPL21|RPL19|RPS4X|RPS5|RPS6|RPS11|RPL31|RPS8|RPS2|RPL15|RPL22|RPS14|RPS19|RPSA|RPS9|RPS18|RPL7|RPL10A|RPL23|RPS29|RPS7|RPS3	39	0.9534883720930232	GO_RIBOSOME_BIOGENESIS (Geneset_Overlap_Data Set 1) GO_ESTABLISHMENT_OF_PROTEIN_LOCALIZATION_TO_ENDOPLASMIC_RETICULUM	false	Geneset_Overlap	GO_RIBOSOME_BIOGENESIS (Geneset_Overlap_Data Set 1) GO_ESTABLISHMENT_OF_PROTEIN_LOCALIZATION_TO_ENDOPLASMIC_RETICULUM
RPL11|RPS16|RPL18|RPL6|RPL13A|RPS12|RPS25|RPL27|RPS3A|RPS15A|RPL12|RPS23|RPL26|RPS17|RPLP0|RPLP2|RPS13|RPL21|RPL19|RPS4X|RPS5|RPS6|RPS11|RPL31|RPS8|RPS2|RPL15|RPL22|RPS14|RPS19|RPSA|RPS9|RPS18|RPL7|RPL10A|RPL23|RPS29|RPS7|RPS3	39	0.7784883720930232	GO_RIBOSOME_BIOGENESIS (Geneset_Overlap_Data Set 1) GO_PEPTIDE_METABOLIC_PROCESS	false	Geneset_Overlap	GO_RIBOSOME_BIOGENESIS (Geneset_Overlap_Data Set 1) GO_PEPTIDE_METABOLIC_PROCESS
RPL11|RPS16|RPL18|RPL6|RPL13A|RPS12|RPS25|RPL27|RPS3A|RPS15A|RPL12|RPS23|RPL26|RPS17|RPLP0|RPLP2|RPS13|RPL21|RPL19|RPS4X|RPS5|RPS6|RPS11|RPL31|RPS8|RPS2|RPL15|RPL22|RPS14|RPS19|RPSA|RPS9|RPS18|RPL7|RPL10A|RPL23|RPS29|RPS7|RPS3	39	0.7445331482124262	GO_RIBOSOME_BIOGENESIS (Geneset_Overlap_Data Set 1) GO_MACROMOLECULE_CATABOLIC_PROCESS	false	Geneset_Overlap	GO_RIBOSOME_BIOGENESIS (Geneset_Overlap_Data Set 1) GO_MACROMOLECULE_CATABOLIC_PROCESS
RPL11|RPS16|RPL18|RPL6|RPL13A|RPS12|RPS25|RPL27|RPS3A|RPS15A|RPL12|RPS23|RPL26|RPS17|RPLP0|RPLP2|RPS13|RPL21|RPL19|RPS4X|RPS5|RPS6|RPS11|RPL31|RPS8|RPS2|RPL15|RPL22|RPS14|RPS19|RPSA|RPS9|RPS18|RPL7|RPL10A|RPL23|RPS29|RPS7|RPS3	39	0.7581758720930232	GO_RIBOSOME_BIOGENESIS (Geneset_Overlap_Data Set 1) GO_CELLULAR_AMIDE_METABOLIC_PROCESS	false	Geneset_Overlap	GO_RIBOSOME_BIOGENESIS (Geneset_Overlap_Data Set 1) GO_CELLULAR_AMIDE_METABOLIC_PROCESS
RPL11|RPS16|RPL18|RPL6|RPL13A|RPS12|RPS25|RPL27|RPS3A|RPS15A|RPL12|RPS23|RPL26|RPS17|RPLP0|RPLP2|RPS13|RPL21|RPL19|RPS4X|RPS5|RPS6|RPS11|RPL31|RPS8|RPS2|RPL15|RPL22|RPS14|RPS19|RPSA|RPS9|RPS18|RPL7|RPL10A|C1QBP|RPL23|RPS29|RPS7|RPS3	40	0.8222591362126246	GO_RIBOSOME_BIOGENESIS (Geneset_Overlap_Data Set 1) GO_MRNA_METABOLIC_PROCESS	false	Geneset_Overlap	GO_RIBOSOME_BIOGENESIS (Geneset_Overlap_Data Set 1) GO_MRNA_METABOLIC_PROCESS
RPL11|RPL18|RPL13A|RPS25|RPS3A|RPL12|RPS23|RAN|NPM1|RPS13|RPL21|RPL19|XPO1|RPS6|RPS11|RPS2|RPS14|RPS19|RPS9|RPL7|RPL10A|C1QBP|RPL23|RPS7|RPS3	25	0.5398110661268556	GO_RIBOSOME_BIOGENESIS (Geneset_Overlap_Data Set 1) GO_NUCLEOLUS	false	Geneset_Overlap	GO_RIBOSOME_BIOGENESIS (Geneset_Overlap_Data Set 1) GO_NUCLEOLUS
RPL11|RPL18|RPL6|RPL13A|RPL27|RPL12|RPL26|RPLP0|RPLP2|RPL21|RPL19|RPL31|RPL15|RPL22|RPL7|RPL10A|RPL23	17	0.6976744186046512	GO_RIBOSOME_BIOGENESIS (Geneset_Overlap_Data Set 1) GO_LARGE_RIBOSOMAL_SUBUNIT	false	Geneset_Overlap	GO_RIBOSOME_BIOGENESIS (Geneset_Overlap_Data Set 1) GO_LARGE_RIBOSOMAL_SUBUNIT
RPL11|RPS16|RPL18|RPL6|RPL13A|RPS12|RPS25|RPL27|RPS3A|RPS15A|RPL12|RPS23|RPL26|RPS17|RPLP0|RPLP2|RPS13|RPL21|RPL19|RPS4X|RPS5|RPS6|RPS11|RPL31|RPS8|RPS2|RPL15|RPL22|RPS14|RPS19|RPSA|RPS9|RPS18|RPL7|RPL10A|RPL23|RPS29|RPS7|RPS3	39	0.9306818181818182	GO_RIBOSOME_BIOGENESIS (Geneset_Overlap_Data Set 1) GO_RIBOSOMAL_SUBUNIT	false	Geneset_Overlap	GO_RIBOSOME_BIOGENESIS (Geneset_Overlap_Data Set 1) GO_RIBOSOMAL_SUBUNIT
RPL11|RPS16|RPL18|RPL6|RPL13A|RPS12|RPS25|RPL27|RPS3A|RPS15A|RPL12|RPS23|RAN|NPM1|RPL26|RPS17|RPLP0|RPLP2|RPS13|RPL21|RPL19|RPS4X|XPO1|RPS5|RPS6|RPS11|RPL31|RPS8|RPS2|RPL15|RPL22|RPS14|RPS19|RPSA|RPS9|RPS18|RPL7|RPL10A|C1QBP|RPL23|RPS29|RPS7|RPS3	43	0.9673913043478262	GO_RIBOSOME_BIOGENESIS (Geneset_Overlap_Data Set 1) GO_RIBONUCLEOPROTEIN_COMPLEX_BIOGENESIS	false	Geneset_Overlap	GO_RIBOSOME_BIOGENESIS (Geneset_Overlap_Data Set 1) GO_RIBONUCLEOPROTEIN_COMPLEX_BIOGENESIS
RPL11|RPS16|RPL18|RPL6|RPL13A|RPS12|RPS25|RPL27|RPS3A|RPS15A|RPL12|RPS23|RPL26|RPS17|RPLP0|RPLP2|RPS13|RPL21|RPL19|RPS4X|RPS5|RPS6|RPS11|RPL31|RPS8|RPS2|RPL15|RPL22|RPS14|RPS19|RPSA|RPS9|RPS18|RPL7|RPL10A|C1QBP|RPL23|RPS29|RPS7|RPS3	40	0.809943865276664	GO_RIBOSOME_BIOGENESIS (Geneset_Overlap_Data Set 1) GO_RNA_PROCESSING	false	Geneset_Overlap	GO_RIBOSOME_BIOGENESIS (Geneset_Overlap_Data Set 1) GO_RNA_PROCESSING
RPL11|RPS16|RPL18|RPL6|RPL13A|RPS12|RPS25|RPL27|RPS3A|RPS15A|RPL12|RPS23|RPL26|RPS17|RPLP0|RPLP2|RPS13|RPL21|RPL19|RPS4X|RPS5|RPS6|RPS11|RPL31|RPS8|RPS2|RPL15|RPL22|RPS14|RPS19|RPSA|RPS9|RPS18|RPL7|RPL10A|RPL23|RPS29|RPS7|RPS3	39	0.9534883720930232	GO_RIBOSOME_BIOGENESIS (Geneset_Overlap_Data Set 1) GO_RRNA_METABOLIC_PROCESS	false	Geneset_Overlap	GO_RIBOSOME_BIOGENESIS (Geneset_Overlap_Data Set 1) GO_RRNA_METABOLIC_PROCESS
RPL11|RPS16|RPL18|RPL6|RPL13A|RPS12|RPS25|RPL27|RPS3A|RPS15A|RPL12|RPS23|RPL26|RPS17|RPLP0|RPLP2|RPS13|RPL21|RPL19|RPS4X|RPS5|RPS6|RPS11|RPL31|RPS8|RPS2|RPL15|RPL22|RPS14|RPS19|RPSA|RPS9|RPS18|RPL7|RPL10A|RPL23|RPS29|RPS7|RPS3	39	0.9306818181818182	GO_RIBOSOME_BIOGENESIS (Geneset_Overlap_Data Set 1) GO_MULTI_ORGANISM_METABOLIC_PROCESS	false	Geneset_Overlap	GO_RIBOSOME_BIOGENESIS (Geneset_Overlap_Data Set 1) GO_MULTI_ORGANISM_METABOLIC_PROCESS
RPL11|RPS16|RPL18|RPL6|RPL13A|RPS12|RPS25|RPL27|RPS3A|RPS15A|RPL12|RPS23|RPL26|RPS17|RPLP0|RPLP2|RPS13|RPL21|RPL19|RPS4X|RPS5|RPS6|RPS11|RPL31|RPS8|RPS2|RPL15|RPL22|RPS14|RPS19|RPSA|RPS9|RPS18|RPL7|RPL10A|RPL23|RPS29|RPS7|RPS3	39	0.8881987577639752	GO_RIBOSOME_BIOGENESIS (Geneset_Overlap_Data Set 1) GO_NCRNA_METABOLIC_PROCESS	false	Geneset_Overlap	GO_RIBOSOME_BIOGENESIS (Geneset_Overlap_Data Set 1) GO_NCRNA_METABOLIC_PROCESS
PDHA1|OGDH|COX5A|NDUFA9|IDH3B|UQCRC2|NDUFS4|UQCRFS1|NDUFV2|ACO2|NDUFS1|UQCRC1|UQCRQ|MDH1|SNCA|IDH2|MDH2|ETFA|SUCLG1|SLC1A3|SDHB|NDUFA5|COX5B|ETFB|IDH3A|PDHB|CYCS|IDH1|SDHA	29	0.953125	GO_ENERGY_DERIVATION_BY_OXIDATION_OF_ORGANIC_COMPOUNDS (Geneset_Overlap_Data Set 1) GO_CELLULAR_RESPIRATION	false	Geneset_Overlap	GO_ENERGY_DERIVATION_BY_OXIDATION_OF_ORGANIC_COMPOUNDS (Geneset_Overlap_Data Set 1) GO_CELLULAR_RESPIRATION
PDHA1|OGDH|ACADVL|COX5A|NDUFA9|IDH3B|UQCRC2|NDUFS4|UQCRFS1|NDUFV2|ACO2|NDUFS1|UQCRC1|UQCRQ|SNCA|PPP1CC|IDH2|MDH2|ETFA|SUCLG1|SLC1A3|SDHB|NDUFA5|COX5B|ETFB|IDH3A|PDHB|CYCS|SDHA	29	0.598125	GO_ENERGY_DERIVATION_BY_OXIDATION_OF_ORGANIC_COMPOUNDS (Geneset_Overlap_Data Set 1) GO_MITOCHONDRIAL_PART	false	Geneset_Overlap	GO_ENERGY_DERIVATION_BY_OXIDATION_OF_ORGANIC_COMPOUNDS (Geneset_Overlap_Data Set 1) GO_MITOCHONDRIAL_PART
UQCRC2|ETFB|CYCS|ETFA|SNCA|NDUFS4|PDHA1|OGDH|COX5A|COX5B|IDH3A|UQCRQ|ACO2|NDUFS1|NDUFV2|IDH3B|SDHB|PDHB|IDH2|UQCRC1|UQCRFS1|NDUFA9|NDUFA5|SDHA|MDH2|SUCLG1|SLC1A3	27	0.6018808777429467	GO_MITOCHONDRIAL_PART (Geneset_Overlap_Data Set 1) GO_CELLULAR_RESPIRATION	false	Geneset_Overlap	GO_MITOCHONDRIAL_PART (Geneset_Overlap_Data Set 1) GO_CELLULAR_RESPIRATION
RPS23|RPS15A|RPL12|RPL19|RPS13|RPL21|RPS17|RPL26|RPLP2|RPLP0|RPL18|RPL13A|RPL6|RPL11|RPS16|RPL27|RPS3A|RPS12|RPL10A|RPS18|RPL7|RPS9|RPS3|RPS7|RPS29|RPL23|RPL31|RPS11|RPS6|RPS4X|RPS5|RPS14|RPS19|RPSA|RPL15|RPS2|RPS8|RPL22	38	0.8152664859981933	GO_ESTABLISHMENT_OF_PROTEIN_LOCALIZATION_TO_ORGANELLE (Geneset_Overlap_Data Set 1) GO_STRUCTURAL_CONSTITUENT_OF_RIBOSOME	false	Geneset_Overlap	GO_ESTABLISHMENT_OF_PROTEIN_LOCALIZATION_TO_ORGANELLE (Geneset_Overlap_Data Set 1) GO_STRUCTURAL_CONSTITUENT_OF_RIBOSOME
RPS23|RPS15A|CTNNB1|RPL12|RPL19|RPS13|RPL21|RPS17|RPL26|RPLP2|RPLP0|RPL18|KPNB1|RPL13A|RPL6|RAB7A|RPL11|RPS16|RPL27|RPS3A|RPS12|RPS25|RPL10A|RPS18|RPL7|RPS9|RPS3|RPS7|RPS29|RPL23|RPL31|RPS11|RPS6|RPS4X|RPS5|RPS14|RPS19|RPSA|RPL15|RPS2|RPS8|RPL22	42	0.7034313725490196	GO_ESTABLISHMENT_OF_PROTEIN_LOCALIZATION_TO_ORGANELLE (Geneset_Overlap_Data Set 1) GO_MACROMOLECULE_CATABOLIC_PROCESS	false	Geneset_Overlap	GO_ESTABLISHMENT_OF_PROTEIN_LOCALIZATION_TO_ORGANELLE (Geneset_Overlap_Data Set 1) GO_MACROMOLECULE_CATABOLIC_PROCESS
RPS23|RPS15A|RPL12|RPL19|RPS13|RPL21|RPS17|RPL26|RPLP2|RPLP0|RPL18|RPL13A|RPL6|RPL11|RPS16|RPL27|RPS3A|RPS12|RPS25|RPL10A|RPS18|RPL7|RPS9|RPS3|RPS7|RPS29|RPL23|RPL31|RPS11|RPS6|RPS4X|RPS5|RPS14|RPS19|RPSA|RPL15|RPS2|RPS8|RPL22	39	0.6691176470588235	GO_ESTABLISHMENT_OF_PROTEIN_LOCALIZATION_TO_ORGANELLE (Geneset_Overlap_Data Set 1) GO_PEPTIDE_METABOLIC_PROCESS	false	Geneset_Overlap	GO_ESTABLISHMENT_OF_PROTEIN_LOCALIZATION_TO_ORGANELLE (Geneset_Overlap_Data Set 1) GO_PEPTIDE_METABOLIC_PROCESS
RPS23|RPS15A|RPL12|RPL19|RPS13|RPL21|RPS17|RPL26|RAN|RPLP2|RPLP0|RPL18|KPNB1|RPL13A|RPL6|RAB7A|RPL11|RPS16|RPL27|RPS3A|RPS12|RPS25|RPL10A|RPS18|HSPA8|RPL7|RPS9|SCARB2|RPS3|RPS7|RPS29|RPL23|RPL31|RPS11|RPS6|RPS4X|RPS5|RPS14|RPS19|RPSA|RPL15|RPS2|RPS8|RPL22	44	0.6758169934640523	GO_ESTABLISHMENT_OF_PROTEIN_LOCALIZATION_TO_ORGANELLE (Geneset_Overlap_Data Set 1) GO_INTERSPECIES_INTERACTION_BETWEEN_ORGANISMS	false	Geneset_Overlap	GO_ESTABLISHMENT_OF_PROTEIN_LOCALIZATION_TO_ORGANELLE (Geneset_Overlap_Data Set 1) GO_INTERSPECIES_INTERACTION_BETWEEN_ORGANISMS
RPS23|RPS15A|CTNNB1|RPL12|RPL19|RPS13|RPL21|RPS17|RPL26|RPLP2|RPLP0|RPL18|KPNB1|RPL13A|RPL6|RAB7A|RPL11|RPS16|RPL27|RPS3A|RPS12|RPS25|RPL10A|RPS18|RPL7|RPS9|RPS3|RPS7|RPS29|RPL23|RPL31|RPS11|RPS6|RPS4X|RPS5|RPS14|RPS19|RPSA|RPL15|RPS2|RPS8|RPL22	42	0.5992647058823529	GO_ESTABLISHMENT_OF_PROTEIN_LOCALIZATION_TO_ORGANELLE (Geneset_Overlap_Data Set 1) GO_CELLULAR_CATABOLIC_PROCESS	false	Geneset_Overlap	GO_ESTABLISHMENT_OF_PROTEIN_LOCALIZATION_TO_ORGANELLE (Geneset_Overlap_Data Set 1) GO_CELLULAR_CATABOLIC_PROCESS
RPS23|RPS15A|RPL12|RPL19|RPS13|RPL21|RPS17|RPL26|RPLP2|RPLP0|RPL18|RPL13A|RPL6|RPL11|RPS16|RPL27|RPS3A|RPS12|RPS25|RPL10A|RPS18|RPL7|RPS9|RPS3|RPS7|RPS29|RPL23|RPL31|RPS11|RPS6|RPS4X|RPS5|RPS14|RPS19|RPSA|RPL15|RPS2|RPS8|RPL22	39	0.8435342843994478	GO_ESTABLISHMENT_OF_PROTEIN_LOCALIZATION_TO_ORGANELLE (Geneset_Overlap_Data Set 1) GO_PROTEIN_TARGETING_TO_MEMBRANE	false	Geneset_Overlap	GO_ESTABLISHMENT_OF_PROTEIN_LOCALIZATION_TO_ORGANELLE (Geneset_Overlap_Data Set 1) GO_PROTEIN_TARGETING_TO_MEMBRANE
RPL12|RPL19|RPL21|RPL26|RPLP2|RPLP0|RPL18|RPL13A|RPL6|RPL11|RPL27|RPL10A|RPL7|RPL23|RPL31|RPL15|RPL22	17	0.6666666666666666	GO_ESTABLISHMENT_OF_PROTEIN_LOCALIZATION_TO_ORGANELLE (Geneset_Overlap_Data Set 1) GO_LARGE_RIBOSOMAL_SUBUNIT	false	Geneset_Overlap	GO_ESTABLISHMENT_OF_PROTEIN_LOCALIZATION_TO_ORGANELLE (Geneset_Overlap_Data Set 1) GO_LARGE_RIBOSOMAL_SUBUNIT
RPS23|RPS15A|RPL12|RPL19|RPS13|RPL21|RPS17|RPL26|RPLP2|RPLP0|RPL18|RPL13A|RPL6|RPL11|RPS16|RPL27|RPS3A|RPS12|RPS25|RPL10A|RPS18|RPL7|RPS9|RPS3|RPS7|RPS29|RPL23|RPL31|RPS11|RPS6|RPS4X|RPS5|RPS14|RPS19|RPSA|RPL15|RPS2|RPS8|RPL22	39	0.8823529411764706	GO_ESTABLISHMENT_OF_PROTEIN_LOCALIZATION_TO_ORGANELLE (Geneset_Overlap_Data Set 1) GO_RRNA_METABOLIC_PROCESS	false	Geneset_Overlap	GO_ESTABLISHMENT_OF_PROTEIN_LOCALIZATION_TO_ORGANELLE (Geneset_Overlap_Data Set 1) GO_RRNA_METABOLIC_PROCESS
RPS23|RPS15A|RPL12|RPL19|RPS13|RPL21|RPS17|RPL26|RPLP2|RPLP0|RPL18|RPL13A|RPL6|RPL11|RPS16|RPL27|RPS3A|RPS12|RPS25|RPL10A|RPS18|RPL7|RPS9|RPS3|RPS7|RPS29|RPL23|RPL31|RPS11|RPS6|RPS4X|RPS5|RPS14|RPS19|RPSA|RPL15|RPS2|RPS8|RPL22	39	0.5990196078431372	GO_ESTABLISHMENT_OF_PROTEIN_LOCALIZATION_TO_ORGANELLE (Geneset_Overlap_Data Set 1) GO_ORGANONITROGEN_COMPOUND_BIOSYNTHETIC_PROCESS	false	Geneset_Overlap	GO_ESTABLISHMENT_OF_PROTEIN_LOCALIZATION_TO_ORGANELLE (Geneset_Overlap_Data Set 1) GO_ORGANONITROGEN_COMPOUND_BIOSYNTHETIC_PROCESS
RPS23|RPS15A|RPL12|RPL19|RPS13|RPL21|RPS17|RPL26|RPLP2|RPLP0|RPL18|RPL13A|RPL6|RPL11|RPS16|RPL27|RPS3A|RPS12|RPS25|RPL10A|RPS18|RPL7|RPS9|RPS3|RPS7|RPS29|RPL23|RPL31|RPS11|RPS6|RPS4X|RPS5|RPS14|RPS19|RPSA|RPL15|RPS2|RPS8|RPL22	39	0.8625	GO_ESTABLISHMENT_OF_PROTEIN_LOCALIZATION_TO_ORGANELLE (Geneset_Overlap_Data Set 1) GO_MULTI_ORGANISM_METABOLIC_PROCESS	false	Geneset_Overlap	GO_ESTABLISHMENT_OF_PROTEIN_LOCALIZATION_TO_ORGANELLE (Geneset_Overlap_Data Set 1) GO_MULTI_ORGANISM_METABOLIC_PROCESS
RPS23|RPS15A|RPL12|RPL19|RPS13|RPL21|RPS17|RPL26|RPLP2|RPLP0|RPL18|RPL13A|RPL6|RPL11|RPS16|RPL27|RPS3A|RPS12|RPS25|RPL10A|RPS18|RPL7|RPS9|RPS3|RPS7|RPS29|RPL23|RPL31|RPS11|RPS6|RPS4X|RPS5|RPS14|RPS19|RPSA|RPL15|RPS2|RPS8|RPL22	39	0.8253968253968254	GO_ESTABLISHMENT_OF_PROTEIN_LOCALIZATION_TO_ORGANELLE (Geneset_Overlap_Data Set 1) GO_RNA_CATABOLIC_PROCESS	false	Geneset_Overlap	GO_ESTABLISHMENT_OF_PROTEIN_LOCALIZATION_TO_ORGANELLE (Geneset_Overlap_Data Set 1) GO_RNA_CATABOLIC_PROCESS
RPS23|RPS15A|RPL12|RPL19|RPS13|RPL21|RPS17|RPL26|RPLP2|RPLP0|RPL18|RPL13A|RPL6|RPL11|RPS16|RPL27|RPS3A|RPS12|RPS25|RPL10A|RPS18|RPL7|RPS9|RPS3|RPS7|RPS29|RPL23|RPL31|RPS11|RPS6|RPS4X|RPS5|RPS14|RPS19|RPSA|RPL15|RPS2|RPS8|RPL22	39	0.8435342843994478	GO_ESTABLISHMENT_OF_PROTEIN_LOCALIZATION_TO_ORGANELLE (Geneset_Overlap_Data Set 1) GO_NCRNA_PROCESSING	false	Geneset_Overlap	GO_ESTABLISHMENT_OF_PROTEIN_LOCALIZATION_TO_ORGANELLE (Geneset_Overlap_Data Set 1) GO_NCRNA_PROCESSING
RPS23|RPS15A|RPL12|RPL19|RPS13|RPL21|RPS17|RPL26|RPLP2|RPLP0|RPL18|RPL13A|RPL6|RPL11|RPS16|RPL27|RPS3A|RPS12|HSP90AA1|HSPA4|RPS25|RPL10A|RPS18|RPL7|RPS9|RPS3|RPS7|RPS29|TOMM22|RPL23|RPL31|RPS11|RPS6|RPS4X|RPS5|RPS14|RPS19|RPSA|RPL15|RPS2|RPS8|RPL22	42	0.7759322033898305	GO_ESTABLISHMENT_OF_PROTEIN_LOCALIZATION_TO_ORGANELLE (Geneset_Overlap_Data Set 1) GO_ESTABLISHMENT_OF_PROTEIN_LOCALIZATION_TO_MEMBRANE	false	Geneset_Overlap	GO_ESTABLISHMENT_OF_PROTEIN_LOCALIZATION_TO_ORGANELLE (Geneset_Overlap_Data Set 1) GO_ESTABLISHMENT_OF_PROTEIN_LOCALIZATION_TO_MEMBRANE
RPS23|RPS15A|CTNNB1|FIS1|RPL12|RPL19|RPS13|RPL21|RPS17|RPL26|RAN|RPLP2|RPLP0|RPL18|KPNB1|RPL13A|RPL6|RAB7A|RPL11|RPS16|RPL27|RPS3A|RPS12|HSP90AA1|HSPA4|RPS25|RPL10A|RPS18|HSPA8|RPL7|RPS9|SCARB2|RPS3|RPS7|RPS29|TOMM22|RPL23|PHB2|RPL31|RPS11|RPS6|RPS4X|RPS5|RPS14|RPS19|RPSA|RPL15|RPS2|RPS8|RPL22	50	0.791400897708481	GO_ESTABLISHMENT_OF_PROTEIN_LOCALIZATION_TO_ORGANELLE (Geneset_Overlap_Data Set 1) GO_INTRACELLULAR_PROTEIN_TRANSPORT	false	Geneset_Overlap	GO_ESTABLISHMENT_OF_PROTEIN_LOCALIZATION_TO_ORGANELLE (Geneset_Overlap_Data Set 1) GO_INTRACELLULAR_PROTEIN_TRANSPORT
RPS23|RPS15A|CTNNB1|FIS1|RPL12|RPL19|RPS13|RPL21|RPS17|RPL26|RAN|RPLP2|RPLP0|RPL18|KPNB1|RPL13A|RPL6|RAB7A|RPL11|RPS16|RPL27|RPS3A|RPS12|HSP90AA1|HSPA4|RPS25|RPL10A|RPS18|HSPA8|RPL7|RPS9|SCARB2|RPS3|RPS7|RPS29|TOMM22|RPL23|PHB2|RPL31|RPS11|RPS6|RPS4X|RPS5|RPS14|RPS19|RPSA|RPL15|RPS2|RPS8|RPL22	50	0.936624649859944	GO_ESTABLISHMENT_OF_PROTEIN_LOCALIZATION_TO_ORGANELLE (Geneset_Overlap_Data Set 1) GO_PROTEIN_TARGETING	false	Geneset_Overlap	GO_ESTABLISHMENT_OF_PROTEIN_LOCALIZATION_TO_ORGANELLE (Geneset_Overlap_Data Set 1) GO_PROTEIN_TARGETING
RPS23|RPS15A|RPL12|RPL19|RPS13|RPL21|RPS17|RPL26|RPLP2|RPLP0|RPL18|RPL13A|RPL6|RPL11|RPS16|RPL27|RPS3A|RPS12|RPS25|RPL10A|RPS18|RPL7|RPS9|RPS3|RPS7|RPS29|RPL23|RPL31|RPS11|RPS6|RPS4X|RPS5|RPS14|RPS19|RPSA|RPL15|RPS2|RPS8|RPL22	39	0.8625	GO_ESTABLISHMENT_OF_PROTEIN_LOCALIZATION_TO_ORGANELLE (Geneset_Overlap_Data Set 1) GO_NUCLEAR_TRANSCRIBED_MRNA_CATABOLIC_PROCESS_NONSENSE_MEDIATED_DECAY	false	Geneset_Overlap	GO_ESTABLISHMENT_OF_PROTEIN_LOCALIZATION_TO_ORGANELLE (Geneset_Overlap_Data Set 1) GO_NUCLEAR_TRANSCRIBED_MRNA_CATABOLIC_PROCESS_NONSENSE_MEDIATED_DECAY
RPS23|RPL12|RPL19|RPS13|RPL21|RAN|RPL18|RPL13A|RPL11|RPS3A|RPS25|RPL10A|HSPA8|RPL7|RPS9|RPS3|RPS7|RPL23|RPS11|RPS6|RPS14|RPS19|RPS2	23	0.466513585916571	GO_ESTABLISHMENT_OF_PROTEIN_LOCALIZATION_TO_ORGANELLE (Geneset_Overlap_Data Set 1) GO_NUCLEOLUS	false	Geneset_Overlap	GO_ESTABLISHMENT_OF_PROTEIN_LOCALIZATION_TO_ORGANELLE (Geneset_Overlap_Data Set 1) GO_NUCLEOLUS
RPS23|RPS15A|RPL12|RPL19|RPS13|RPL21|RPS17|RPL26|RPLP2|RPLP0|RPL18|RPL13A|RPL6|RPL11|RPS16|RPL27|RPS3A|RPS12|RPS25|RPL10A|RPS18|RPL7|RPS9|RPS3|RPS7|RPS29|RPL23|RPL31|RPS11|RPS6|RPS4X|RPS5|RPS14|RPS19|RPSA|RPL15|RPS2|RPS8|RPL22	39	0.6918767507002801	GO_ESTABLISHMENT_OF_PROTEIN_LOCALIZATION_TO_ORGANELLE (Geneset_Overlap_Data Set 1) GO_CYTOSOLIC_PART	false	Geneset_Overlap	GO_ESTABLISHMENT_OF_PROTEIN_LOCALIZATION_TO_ORGANELLE (Geneset_Overlap_Data Set 1) GO_CYTOSOLIC_PART
RPS23|RPS15A|RPL12|RPL19|RPS13|RPL21|RPS17|RPL26|RPLP2|RPLP0|RPL18|RPL13A|RPL6|RPL11|RPS16|RPL27|RPS3A|RPS12|RPS25|RPL10A|RPS18|RPL7|RPS9|RPS3|RPS7|RPS29|RPL23|RPL31|RPS11|RPS6|RPS4X|RPS5|RPS14|RPS19|RPSA|RPL15|RPS2|RPS8|RPL22	39	0.6531862745098038	GO_ESTABLISHMENT_OF_PROTEIN_LOCALIZATION_TO_ORGANELLE (Geneset_Overlap_Data Set 1) GO_CELLULAR_AMIDE_METABOLIC_PROCESS	false	Geneset_Overlap	GO_ESTABLISHMENT_OF_PROTEIN_LOCALIZATION_TO_ORGANELLE (Geneset_Overlap_Data Set 1) GO_CELLULAR_AMIDE_METABOLIC_PROCESS
RPS23|RPS15A|CTNNB1|FIS1|RPL12|RPL19|RPS13|RPL21|RPS17|RPL26|RPLP2|RPLP0|RPL18|KPNB1|RPL13A|RPL6|RAB7A|RPL11|RPS16|RPL27|RPS3A|RPS12|RPS25|RPL10A|RPS18|RPL7|RPS9|RPS3|RPS7|RPS29|HK1|RPL23|RPL31|RPS11|RPS6|RPS4X|RPS5|RPS14|RPS19|RPSA|RPL15|RPS2|RPS8|RPL22	44	0.5993114803173178	GO_ESTABLISHMENT_OF_PROTEIN_LOCALIZATION_TO_ORGANELLE (Geneset_Overlap_Data Set 1) GO_CATABOLIC_PROCESS	false	Geneset_Overlap	GO_ESTABLISHMENT_OF_PROTEIN_LOCALIZATION_TO_ORGANELLE (Geneset_Overlap_Data Set 1) GO_CATABOLIC_PROCESS
RPS23|RPS15A|RPL12|RPL19|RPS13|RPL21|RPS17|RPL26|RPLP2|RPLP0|RPL18|RPL13A|RPL6|RPL11|RPS16|RPL27|RPS3A|RPS12|RPS25|RPL10A|RPS18|RPL7|RPS9|RPS3|RPS7|RPS29|RPL23|RPL31|RPS11|RPS6|RPS4X|RPS5|RPS14|RPS19|RPSA|RPL15|RPS2|RPS8|RPL22	39	0.8625	GO_ESTABLISHMENT_OF_PROTEIN_LOCALIZATION_TO_ORGANELLE (Geneset_Overlap_Data Set 1) GO_RIBOSOMAL_SUBUNIT	false	Geneset_Overlap	GO_ESTABLISHMENT_OF_PROTEIN_LOCALIZATION_TO_ORGANELLE (Geneset_Overlap_Data Set 1) GO_RIBOSOMAL_SUBUNIT
RPS23|RPS15A|RPL12|RPL19|RPS13|RPL21|RPS17|RPL26|RAN|RPLP2|RPLP0|RPL18|RPL13A|RPL6|RPL11|RPS16|RPL27|RPS3A|RPS12|RPS25|RPL10A|RPS18|RPL7|RPS9|RPS3|RPS7|RPS29|RPL23|RPL31|RPS11|RPS6|RPS4X|RPS5|RPS14|RPS19|RPSA|RPL15|RPS2|RPS8|RPL22	40	0.7856598016781082	GO_ESTABLISHMENT_OF_PROTEIN_LOCALIZATION_TO_ORGANELLE (Geneset_Overlap_Data Set 1) GO_RIBONUCLEOPROTEIN_COMPLEX_BIOGENESIS	false	Geneset_Overlap	GO_ESTABLISHMENT_OF_PROTEIN_LOCALIZATION_TO_ORGANELLE (Geneset_Overlap_Data Set 1) GO_RIBONUCLEOPROTEIN_COMPLEX_BIOGENESIS
RPS23|RPS15A|RPL12|RPL19|RPS13|RPL21|RPS17|RPL26|RPLP2|RPLP0|RPL18|RPL13A|RPL6|RPL11|RPS16|RPL27|RPS3A|RPS12|RPS25|RPL10A|RPS18|RPL7|RPS9|RPS3|RPS7|RPS29|RPL23|RPL31|RPS11|RPS6|RPS4X|RPS5|RPS14|RPS19|RPSA|RPL15|RPS2|RPS8|RPL22	39	0.8080338266384778	GO_ESTABLISHMENT_OF_PROTEIN_LOCALIZATION_TO_ORGANELLE (Geneset_Overlap_Data Set 1) GO_RIBOSOME	false	Geneset_Overlap	GO_ESTABLISHMENT_OF_PROTEIN_LOCALIZATION_TO_ORGANELLE (Geneset_Overlap_Data Set 1) GO_RIBOSOME
RPS23|RPS15A|RPL12|RPL19|RPS13|RPL21|RPS17|RPL26|RPLP2|RPLP0|RPL18|RPL13A|RPL6|RPL11|RPS16|RPL27|RPS3A|RPS12|RPS25|RPL10A|RPS18|RPL7|RPS9|RPS3|RPS7|RPS29|RPL23|RPL31|RPS11|RPS6|RPS4X|RPS5|RPS14|RPS19|RPSA|RPL15|RPS2|RPS8|RPL22	39	0.6918767507002801	GO_ESTABLISHMENT_OF_PROTEIN_LOCALIZATION_TO_ORGANELLE (Geneset_Overlap_Data Set 1) GO_AMIDE_BIOSYNTHETIC_PROCESS	false	Geneset_Overlap	GO_ESTABLISHMENT_OF_PROTEIN_LOCALIZATION_TO_ORGANELLE (Geneset_Overlap_Data Set 1) GO_AMIDE_BIOSYNTHETIC_PROCESS
RPS23|RPS15A|RPL12|RPL19|RPS13|RPL21|RPS17|RPL26|RPLP2|RPLP0|RPL18|RPL13A|RPL6|RPL11|RPS16|RPL27|RPS3A|RPS12|RPS25|RPL10A|RPS18|RPL7|RPS9|RPS3|RPS7|RPS29|RPL23|RPL31|RPS11|RPS6|RPS4X|RPS5|RPS14|RPS19|RPSA|RPL15|RPS2|RPS8|RPL22	39	0.8253968253968254	GO_ESTABLISHMENT_OF_PROTEIN_LOCALIZATION_TO_ORGANELLE (Geneset_Overlap_Data Set 1) GO_NCRNA_METABOLIC_PROCESS	false	Geneset_Overlap	GO_ESTABLISHMENT_OF_PROTEIN_LOCALIZATION_TO_ORGANELLE (Geneset_Overlap_Data Set 1) GO_NCRNA_METABOLIC_PROCESS
RPS23|RPS15A|RPL12|RPL19|RPS13|RPL21|RPS17|RPL26|RPLP2|RPLP0|RPL18|RPL13A|RPL6|RPL11|RPS16|RPL27|RPS3A|RPS12|HSP90AA1|HSPA4|RPS25|RPL10A|RPS18|RPL7|RPS9|RPS3|RPS7|RPS29|TOMM22|RPL23|RPL31|RPS11|RPS6|RPS4X|RPS5|RPS14|RPS19|RPSA|RPL15|RPS2|RPS8|RPL22	42	0.7398897058823529	GO_ESTABLISHMENT_OF_PROTEIN_LOCALIZATION_TO_ORGANELLE (Geneset_Overlap_Data Set 1) GO_PROTEIN_LOCALIZATION_TO_MEMBRANE	false	Geneset_Overlap	GO_ESTABLISHMENT_OF_PROTEIN_LOCALIZATION_TO_ORGANELLE (Geneset_Overlap_Data Set 1) GO_PROTEIN_LOCALIZATION_TO_MEMBRANE
RPS23|RPS15A|RPL12|RPL19|RPS13|RPL21|RPS17|RPL26|RPLP2|RPLP0|RPL18|RPL13A|RPL6|RPL11|RPS16|RPL27|RPS3A|RPS12|RPS25|RPL10A|RPS18|HSPA8|RPL7|RPS9|RPS3|RPS7|RPS29|RPL23|RPL31|RPS11|RPS6|RPS4X|RPS5|RPS14|RPS19|RPSA|RPL15|RPS2|RPS8|RPL22	40	0.6951871657754011	GO_ESTABLISHMENT_OF_PROTEIN_LOCALIZATION_TO_ORGANELLE (Geneset_Overlap_Data Set 1) GO_RNA_PROCESSING	false	Geneset_Overlap	GO_ESTABLISHMENT_OF_PROTEIN_LOCALIZATION_TO_ORGANELLE (Geneset_Overlap_Data Set 1) GO_RNA_PROCESSING
RPS23|RPS15A|RPL12|RPL19|RPS13|RPL21|RPS17|RPL26|RPLP2|RPLP0|RPL18|RPL13A|RPL6|RPL11|RPS16|RPL27|RPS3A|RPS12|RPS25|RPL10A|RPS18|HSPA8|RPL7|RPS9|RPS3|RPS7|RPS29|RPL23|RPL31|RPS11|RPS6|RPS4X|RPS5|RPS14|RPS19|RPSA|RPL15|RPS2|RPS8|RPL22	40	0.704656862745098	GO_ESTABLISHMENT_OF_PROTEIN_LOCALIZATION_TO_ORGANELLE (Geneset_Overlap_Data Set 1) GO_MRNA_METABOLIC_PROCESS	false	Geneset_Overlap	GO_ESTABLISHMENT_OF_PROTEIN_LOCALIZATION_TO_ORGANELLE (Geneset_Overlap_Data Set 1) GO_MRNA_METABOLIC_PROCESS
RPS23|RPS15A|RPL12|RPL19|RPS13|RPL21|RPS17|RPL26|RAN|RPLP2|RPLP0|RPL18|RPL13A|RPL6|RPL11|RPS16|RPL27|RPS3A|RPS12|RPS25|RPL10A|RPS18|RPL7|RPS9|RPS3|RPS7|RPS29|RPL23|RPL31|RPS11|RPS6|RPS4X|RPS5|RPS14|RPS19|RPSA|RPL15|RPS2|RPS8|RPL22	40	0.8354866494401378	GO_ESTABLISHMENT_OF_PROTEIN_LOCALIZATION_TO_ORGANELLE (Geneset_Overlap_Data Set 1) GO_RIBOSOME_BIOGENESIS	false	Geneset_Overlap	GO_ESTABLISHMENT_OF_PROTEIN_LOCALIZATION_TO_ORGANELLE (Geneset_Overlap_Data Set 1) GO_RIBOSOME_BIOGENESIS
RPS23|RPS15A|RPL12|RPL19|RPS13|RPL21|RPS17|RPL26|RPLP2|RPLP0|RPL18|RPL13A|RPL6|RPL11|RPS16|RPL27|RPS3A|RPS12|RPS25|RPL10A|RPS18|RPL7|RPS9|RPS3|RPS7|RPS29|RPL23|RPL31|RPS11|RPS6|RPS4X|RPS5|RPS14|RPS19|RPSA|RPL15|RPS2|RPS8|RPL22	39	0.8823529411764706	GO_ESTABLISHMENT_OF_PROTEIN_LOCALIZATION_TO_ORGANELLE (Geneset_Overlap_Data Set 1) GO_ESTABLISHMENT_OF_PROTEIN_LOCALIZATION_TO_ENDOPLASMIC_RETICULUM	false	Geneset_Overlap	GO_ESTABLISHMENT_OF_PROTEIN_LOCALIZATION_TO_ORGANELLE (Geneset_Overlap_Data Set 1) GO_ESTABLISHMENT_OF_PROTEIN_LOCALIZATION_TO_ENDOPLASMIC_RETICULUM
RPS29|RPL10A|RPS18|RPL7|RPS19|RPS14|RPL22|KHSRP|RPS4X|RPS15A|RPS3A|RPL27|RPS25|RPS12|RPL6|RPL13A|RPL23|RPSA|RPS2|RPL15|RPS11|RPL19|RPL21|RPLP0|RPS17|PABPC1|RPS3|RPS9|RPS8|RPL31|RPS13|HNRNPD|RPLP2|RPS23|RPL12|RPL11|RPS7|RPS6|RPS5|RPL26|RPL18|RPS16	42	0.6693548387096774	GO_CATABOLIC_PROCESS (Geneset_Overlap_Data Set 1) GO_RNA_CATABOLIC_PROCESS	false	Geneset_Overlap	GO_CATABOLIC_PROCESS (Geneset_Overlap_Data Set 1) GO_RNA_CATABOLIC_PROCESS
RPS29|RPL10A|RPS18|RPL7|RPS19|RPS14|RPL22|RPS4X|RPS15A|SCP2|RPS3A|RPL27|RPS25|RPS12|RPL6|RPL13A|RPL23|APOE|RPSA|RPS2|RPL15|RPS11|RPL19|RPL21|RPLP0|RPS17|RPS3|RPS9|RPS8|RPL31|RPS13|RPLP2|RPS23|RPL12|RPL11|RPS7|RPS6|RPS5|ATP1B1|RPL26|RPL18|RPS16	42	0.5351028533510286	GO_CATABOLIC_PROCESS (Geneset_Overlap_Data Set 1) GO_PROTEIN_LOCALIZATION_TO_MEMBRANE	false	Geneset_Overlap	GO_CATABOLIC_PROCESS (Geneset_Overlap_Data Set 1) GO_PROTEIN_LOCALIZATION_TO_MEMBRANE
RPL10A|RPL7|RPL22|RPL27|RPL6|RPL13A|RPL23|RPL15|RPL19|RPL21|RPLP0|RPL31|RPLP2|RPL12|RPL11|RPL26|RPL18	17	0.5685483870967742	GO_CATABOLIC_PROCESS (Geneset_Overlap_Data Set 1) GO_LARGE_RIBOSOMAL_SUBUNIT	false	Geneset_Overlap	GO_CATABOLIC_PROCESS (Geneset_Overlap_Data Set 1) GO_LARGE_RIBOSOMAL_SUBUNIT
TST|MPST|RPS29|HSD17B10|RPL10A|RPS18|PRDX3|RPL7|PSMA6|RPS19|RPS14|RPL22|KHSRP|GAA|HBA1|RPS4X|PRDX6|OAT|FABP7|VCP|RPS15A|SCP2|RPS3A|RPL27|RPS25|RPS12|RPL6|RPL13A|ACADVL|POR|ETFA|RPL23|ETFB|UBE2N|CRYM|APOE|RPSA|DECR1|RPS2|RPL15|RPS11|BDH1|HIBADH|UBA1|DDAH2|RPL19|HSD17B4|RPL21|PRDX2|RPLP0|RPS17|GPD2|HADHA|PABPC1|GOT2|PRDX1|UCHL1|PSMA2|OGDH|PSMB4|PSMD2|HADH|ECHS1|RPS3|OXCT1|TPI1|RPS9|PSMB6|ABCD3|RPS8…	103	0.9153225806451613	GO_CATABOLIC_PROCESS (Geneset_Overlap_Data Set 1) GO_CELLULAR_CATABOLIC_PROCESS	false	Geneset_Overlap	GO_CATABOLIC_PROCESS (Geneset_Overlap_Data Set 1) GO_CELLULAR_CATABOLIC_PROCESS
RPS29|RPL10A|RPS18|RPL7|RPS19|RPS14|RPL22|RPS4X|VCP|RPS15A|RPS3A|RPL27|RPS25|RPS12|RPL6|RPL13A|RPL23|APOE|RPSA|RPS2|RPL15|RPS11|RPL19|RPL21|RPLP0|RPS17|PSMB4|RPS3|RPS9|PSMB6|RPS8|RPL31|RPS13|RPLP2|RPS23|RPL12|KPNB1|PSMB5|RPL11|RAB7A|CTSB|RPS7|RPS6|RPS5|RPL26|RPL18|RPS16	47	0.430007530120482	GO_CATABOLIC_PROCESS (Geneset_Overlap_Data Set 1) GO_INTERSPECIES_INTERACTION_BETWEEN_ORGANISMS	false	Geneset_Overlap	GO_CATABOLIC_PROCESS (Geneset_Overlap_Data Set 1) GO_INTERSPECIES_INTERACTION_BETWEEN_ORGANISMS
RPS29|RPL10A|RPS18|RPL7|RPS19|RPS14|RPL22|RPS4X|RPS15A|RPS3A|RPL27|RPS25|RPS12|RPL6|RPL13A|RPL23|RPSA|RPS2|RPL15|RPS11|RPL19|RPL21|RPLP0|RPS17|PABPC1|RPS3|RPS9|RPS8|RPL31|RPS13|RPLP2|RPS23|RPL12|RPL11|RPS7|RPS6|RPS5|RPL26|RPL18|RPS16	40	0.5	GO_CATABOLIC_PROCESS (Geneset_Overlap_Data Set 1) GO_PEPTIDE_METABOLIC_PROCESS	false	Geneset_Overlap	GO_CATABOLIC_PROCESS (Geneset_Overlap_Data Set 1) GO_PEPTIDE_METABOLIC_PROCESS
RPS29|RPL10A|RPS18|RPL7|RPS19|RPS14|RPL22|RPS4X|RPS15A|RPS3A|RPL27|RPS25|RPS12|RPL6|RPL13A|RPL23|RPSA|RPS2|RPL15|RPS11|RPL19|RPL21|RPLP0|RPS17|PABPC1|RPS3|ATPIF1|RPS9|RPS8|RPL31|RPS13|RPLP2|RPS23|RPL12|RPL11|RPS7|RPS6|RPS5|RPL26|RPL18|RPS16	41	0.5549458589405911	GO_CATABOLIC_PROCESS (Geneset_Overlap_Data Set 1) GO_AMIDE_BIOSYNTHETIC_PROCESS	false	Geneset_Overlap	GO_CATABOLIC_PROCESS (Geneset_Overlap_Data Set 1) GO_AMIDE_BIOSYNTHETIC_PROCESS
RPS29|RPL10A|RPS18|RPL7|RPS19|RPS14|RPL22|RPS4X|RPS15A|RPS3A|RPL27|RPS12|RPL6|RPL13A|RPL23|RPSA|RPS2|RPL15|RPS11|RPL19|RPL21|RPLP0|RPS17|RPS3|RPS9|RPS8|RPL31|RPS13|RPLP2|RPS23|RPL12|RPL11|RPS7|RPS6|RPS5|RPL26|RPL18|RPS16	38	0.6130209333589399	GO_CATABOLIC_PROCESS (Geneset_Overlap_Data Set 1) GO_STRUCTURAL_CONSTITUENT_OF_RIBOSOME	false	Geneset_Overlap	GO_CATABOLIC_PROCESS (Geneset_Overlap_Data Set 1) GO_STRUCTURAL_CONSTITUENT_OF_RIBOSOME
RPS29|RPL10A|RPS18|RPL7|RPS19|RPS14|RPL22|RPS4X|RPS15A|RPS3A|RPL27|RPS25|RPS12|RPL6|RPL13A|RPL23|RPSA|RPS2|RPL15|RPS11|RPL19|RPL21|RPLP0|RPS17|RPS3|RPS9|RPS8|RPL31|RPS13|RPLP2|RPS23|RPL12|RPL11|RPS7|RPS6|RPS5|RPL26|RPL18|RPS16	39	0.5727680053103219	GO_CATABOLIC_PROCESS (Geneset_Overlap_Data Set 1) GO_RIBONUCLEOPROTEIN_COMPLEX_BIOGENESIS	false	Geneset_Overlap	GO_CATABOLIC_PROCESS (Geneset_Overlap_Data Set 1) GO_RIBONUCLEOPROTEIN_COMPLEX_BIOGENESIS
RPS29|RPL10A|RPS18|RPL7|RPS19|RPS14|RPL22|RPS4X|RPS15A|RPS3A|RPL27|RPS25|RPS12|RPL6|RPL13A|RPL23|RPSA|RPS2|RPL15|RPS11|RPL19|RPL21|RPLP0|RPS17|PABPC1|RPS3|RPS9|RPS8|RPL31|RPS13|RPLP2|RPS23|RPL12|RPL11|RPS7|RPS6|RPS5|RPL26|RPL18|RPS16	40	0.6612903225806451	GO_CATABOLIC_PROCESS (Geneset_Overlap_Data Set 1) GO_NUCLEAR_TRANSCRIBED_MRNA_CATABOLIC_PROCESS_NONSENSE_MEDIATED_DECAY	false	Geneset_Overlap	GO_CATABOLIC_PROCESS (Geneset_Overlap_Data Set 1) GO_NUCLEAR_TRANSCRIBED_MRNA_CATABOLIC_PROCESS_NONSENSE_MEDIATED_DECAY
RPS29|RPL10A|ENO2|RPS18|PRDX3|RPL7|RPS19|RPS14|RPL22|HBA1|RPS4X|PFKL|RPS15A|RPS3A|RPL27|RPS25|RPS12|RPL6|RPL13A|RPL23|RPSA|RPS2|RPL15|RPS11|RPL19|RPL21|RPLP0|RPS17|PSMD2|RPS3|RPS9|RPS8|RPL31|RPS13|RPLP2|RPS23|RPL12|RPL11|RPS7|RPS6|RPS5|RPL26|HBB|RPL18|RPS16	45	0.6142533936651584	GO_CATABOLIC_PROCESS (Geneset_Overlap_Data Set 1) GO_CYTOSOLIC_PART	false	Geneset_Overlap	GO_CATABOLIC_PROCESS (Geneset_Overlap_Data Set 1) GO_CYTOSOLIC_PART
RPS29|RPL10A|RPS18|RPL7|RPS19|RPS14|RPL22|RPS4X|RPS15A|RPS3A|RPL27|RPS25|RPS12|RPL6|RPL13A|RPL23|RPSA|RPS2|RPL15|RPS11|RPL19|RPL21|RPLP0|RPS17|PABPC1|RPS3|ATPIF1|RPS9|RPS8|RPL31|RPS13|RPLP2|RPS23|RPL12|RPL11|RPS7|RPS6|RPS5|RPL26|RPL18|RPS16	41	0.48502331002331	GO_CATABOLIC_PROCESS (Geneset_Overlap_Data Set 1) GO_CELLULAR_AMIDE_METABOLIC_PROCESS	false	Geneset_Overlap	GO_CATABOLIC_PROCESS (Geneset_Overlap_Data Set 1) GO_CELLULAR_AMIDE_METABOLIC_PROCESS
RPS29|RPL10A|RPS18|RPL7|RPS19|RPS14|RPL22|YWHAH|RPS4X|VCP|RPS15A|RPS3A|RPL27|RPS25|RPS12|RPL6|RPL13A|RPL23|RPSA|RPS2|RPL15|RPS11|RPL19|RPL21|RPLP0|RPS17|RPS3|RPS9|RPS8|RPL31|RPS13|RPLP2|RPS23|RPL12|KPNB1|RPL11|RAB7A|RPS7|RPS6|RPS5|ATP1B1|RPL26|HSP90B1|FIS1|CTNNB1|RPL18|RPS16	47	0.4343841079920233	GO_CATABOLIC_PROCESS (Geneset_Overlap_Data Set 1) GO_INTRACELLULAR_PROTEIN_TRANSPORT	false	Geneset_Overlap	GO_CATABOLIC_PROCESS (Geneset_Overlap_Data Set 1) GO_INTRACELLULAR_PROTEIN_TRANSPORT
RPS29|RPL10A|RPS18|RPL7|RPS19|RPS14|RPL22|RPS4X|RPS15A|RPS3A|RPL27|RPS25|RPS12|RPL6|RPL13A|RPL23|RPSA|RPS2|RPL15|RPS11|RPL19|RPL21|RPLP0|RPS17|RPS3|RPS9|RPS8|RPL31|RPS13|RPLP2|RPS23|RPL12|RPL11|RPS7|RPS6|RPS5|ATP1B1|RPL26|RPL18|RPS16	40	0.5492537313432836	GO_CATABOLIC_PROCESS (Geneset_Overlap_Data Set 1) GO_ESTABLISHMENT_OF_PROTEIN_LOCALIZATION_TO_MEMBRANE	false	Geneset_Overlap	GO_CATABOLIC_PROCESS (Geneset_Overlap_Data Set 1) GO_ESTABLISHMENT_OF_PROTEIN_LOCALIZATION_TO_MEMBRANE
RPS29|HSD17B10|RPL10A|RPS18|RPL7|RPS19|RPS14|RPL22|RPS4X|RPS15A|RPS3A|RPL27|RPS25|RPS12|RPL6|RPL13A|RPL23|RPSA|RPS2|RPL15|RPS11|RPL19|RPL21|RPLP0|RPS17|RPS3|RPS9|RPS8|RPL31|RPS13|RPLP2|RPS23|RPL12|RPL11|RPS7|RPS6|RPS5|RPL26|RPL18|RPS16	40	0.6478048780487805	GO_CATABOLIC_PROCESS (Geneset_Overlap_Data Set 1) GO_NCRNA_PROCESSING	false	Geneset_Overlap	GO_CATABOLIC_PROCESS (Geneset_Overlap_Data Set 1) GO_NCRNA_PROCESSING
RPL10A|RPL7|RPS19|RPS14|RPS3A|RPS25|RPL13A|ACADVL|RPL23|UBE2N|RPS2|RPS11|RPL19|RPL21|PAFAH1B2|RPS3|RPS9|RPS13|RPS23|RPL12|RPL11|CTSB|RPS7|RPS6|RPL18	25	0.4110925306577481	GO_CATABOLIC_PROCESS (Geneset_Overlap_Data Set 1) GO_NUCLEOLUS	false	Geneset_Overlap	GO_CATABOLIC_PROCESS (Geneset_Overlap_Data Set 1) GO_NUCLEOLUS
RPS29|HSD17B10|RPL10A|RPS18|RPL7|RPS19|RPS14|RPL22|KHSRP|RPS4X|RPS15A|RPS3A|RPL27|RPS25|RPS12|RPL6|RPL13A|RPL23|RPSA|RPS2|RPL15|RPS11|RPL19|RPL21|RPLP0|RPS17|PABPC1|RPS3|RPS9|RPS8|RPL31|RPS13|HNRNPD|RPLP2|RPS23|RPL12|RPL11|RPS7|RPS6|RPS5|RPL26|RPL18|RPS16	43	0.5489973262032086	GO_CATABOLIC_PROCESS (Geneset_Overlap_Data Set 1) GO_RNA_PROCESSING	false	Geneset_Overlap	GO_CATABOLIC_PROCESS (Geneset_Overlap_Data Set 1) GO_RNA_PROCESSING
RPS29|RPL10A|RPS18|RPL7|RPS19|RPS14|RPL22|RPS4X|RPS15A|RPS3A|RPL27|RPS25|RPS12|RPL6|RPL13A|RPL23|RPSA|RPS2|RPL15|RPS11|RPL19|RPL21|RPLP0|RPS17|RPS3|RPS9|RPS8|RPL31|RPS13|RPLP2|RPS23|RPL12|KPNB1|RPL11|RAB7A|RPS7|RPS6|RPS5|RPL26|FIS1|CTNNB1|RPL18|RPS16	43	0.5489973262032086	GO_CATABOLIC_PROCESS (Geneset_Overlap_Data Set 1) GO_PROTEIN_TARGETING	false	Geneset_Overlap	GO_CATABOLIC_PROCESS (Geneset_Overlap_Data Set 1) GO_PROTEIN_TARGETING
RPS29|HSD17B10|RPL10A|RPS18|RPL7|RPS19|RPS14|RPL22|RPS4X|RPS15A|RPS3A|RPL27|RPS25|RPS12|RPL6|RPL13A|RPL23|RPSA|RPS2|RPL15|RPS11|RPL19|RPL21|RPLP0|RPS17|RPS3|RPS9|RPS8|RPL31|RPS13|RPLP2|RPS23|RPL12|RPL11|RPS7|RPS6|RPS5|RPL26|RPL18|RPS16	40	0.6349206349206349	GO_CATABOLIC_PROCESS (Geneset_Overlap_Data Set 1) GO_NCRNA_METABOLIC_PROCESS	false	Geneset_Overlap	GO_CATABOLIC_PROCESS (Geneset_Overlap_Data Set 1) GO_NCRNA_METABOLIC_PROCESS
RPS29|RPL10A|RPS18|RPL7|RPS19|RPS14|RPL22|RPS4X|RPS15A|RPS3A|RPL27|RPS25|RPS12|RPL6|RPL13A|RPL23|RPSA|RPS2|RPL15|RPS11|RPL19|RPL21|RPLP0|RPS17|RPS3|RPS9|RPS8|RPL31|RPS13|RPLP2|RPS23|RPL12|RPL11|RPS7|RPS6|RPS5|RPL26|RPL18|RPS16	39	0.657258064516129	GO_CATABOLIC_PROCESS (Geneset_Overlap_Data Set 1) GO_RRNA_METABOLIC_PROCESS	false	Geneset_Overlap	GO_CATABOLIC_PROCESS (Geneset_Overlap_Data Set 1) GO_RRNA_METABOLIC_PROCESS
RPS29|RPL10A|RPS18|RPL7|RPS19|RPS14|RPL22|NME2|RPS4X|OAT|RPS15A|RPS3A|RPL27|RPS25|RPS12|RPL6|RPL13A|RPL23|RPSA|RPS2|RPL15|RPS11|RPL19|RPL21|RPLP0|RPS17|PABPC1|GOT2|RPS3|ATPIF1|RPS9|RPS8|RPL31|RPS13|SLC1A3|ALDOA|RPLP2|RPS23|RPL12|RPL11|GLUD1|GLS|RPS7|GOT1|ABAT|RPS6|RPS5|RPL26|RPL18|RPS16	50	0.48498650472334687	GO_CATABOLIC_PROCESS (Geneset_Overlap_Data Set 1) GO_ORGANONITROGEN_COMPOUND_BIOSYNTHETIC_PROCESS	false	Geneset_Overlap	GO_CATABOLIC_PROCESS (Geneset_Overlap_Data Set 1) GO_ORGANONITROGEN_COMPOUND_BIOSYNTHETIC_PROCESS
RPS29|RPL10A|RPS18|RPL7|RPS19|RPS14|RPL22|RPS4X|RPS15A|RPS3A|RPL27|RPS25|RPS12|RPL6|RPL13A|RPL23|RPSA|RPS2|RPL15|RPS11|RPL19|RPL21|RPLP0|RPS17|RPS3|RPS9|RPS8|RPL31|RPS13|RPLP2|RPS23|RPL12|RPL11|RPS7|RPS6|RPS5|RPL26|RPL18|RPS16	39	0.6435	GO_CATABOLIC_PROCESS (Geneset_Overlap_Data Set 1) GO_MULTI_ORGANISM_METABOLIC_PROCESS	false	Geneset_Overlap	GO_CATABOLIC_PROCESS (Geneset_Overlap_Data Set 1) GO_MULTI_ORGANISM_METABOLIC_PROCESS
RPS29|RPL10A|RPS18|RPL7|PSMA6|RPS19|RPS14|RPL22|KHSRP|GAA|RPS4X|VCP|RPS15A|RPS3A|RPL27|RPS25|RPS12|RPL6|RPL13A|RPL23|UBE2N|APOE|RPSA|RPS2|RPL15|RPS11|UBA1|RPL19|RPL21|RPLP0|RPS17|PABPC1|UCHL1|PSMA2|PSMB4|PSMD2|RPS3|RPS9|PSMB6|RPS8|RPL31|PSMA1|RPS13|HNRNPD|HMGB1|SKP1|RPLP2|RPS23|RPL12|KPNB1|PSMB5|RPL11|RAB7A|CTSB|RPS7|RPS6|RPS5|RPL26|CTSD|HSP90B1|CTNNB1|RPL18|RPS16	63	0.7540322580645161	GO_CATABOLIC_PROCESS (Geneset_Overlap_Data Set 1) GO_MACROMOLECULE_CATABOLIC_PROCESS	false	Geneset_Overlap	GO_CATABOLIC_PROCESS (Geneset_Overlap_Data Set 1) GO_MACROMOLECULE_CATABOLIC_PROCESS
RPS29|RPL10A|RPS18|RPL7|RPS19|RPS14|RPL22|HBA1|RPS4X|RPS15A|RPS3A|RPL27|RPS25|RPS12|RPL6|RPL13A|RPL23|RPSA|RPS2|RPL15|RPS11|RPL19|RPL21|RPLP0|RPS17|RPS3|RPS9|RPS8|RPL31|RPS13|RPLP2|RPS23|RPL12|RPL11|RPS7|RPS6|RPS5|RPL26|RPL18|RPS16	40	0.6225965940303974	GO_CATABOLIC_PROCESS (Geneset_Overlap_Data Set 1) GO_RIBOSOME	false	Geneset_Overlap	GO_CATABOLIC_PROCESS (Geneset_Overlap_Data Set 1) GO_RIBOSOME
RPS29|RPL10A|RPS18|RPL7|RPS19|RPS14|RPL22|HBA1|RPS4X|RPS15A|RPS3A|RPL27|RPS25|RPS12|RPL6|RPL13A|RPL23|RPSA|RPS2|RPL15|RPS11|RPL19|RPL21|RPLP0|RPS17|RPS3|RPS9|RPS8|RPL31|RPS13|RPLP2|RPS23|RPL12|RPL11|RPS7|RPS6|RPS5|RPL26|RPL18|RPS16	40	0.6612903225806451	GO_CATABOLIC_PROCESS (Geneset_Overlap_Data Set 1) GO_RIBOSOMAL_SUBUNIT	false	Geneset_Overlap	GO_CATABOLIC_PROCESS (Geneset_Overlap_Data Set 1) GO_RIBOSOMAL_SUBUNIT
RPS29|RPL10A|RPS18|RPL7|RPS19|RPS14|RPL22|RPS4X|RPS15A|RPS3A|RPL27|RPS25|RPS12|RPL6|RPL13A|RPL23|RPSA|RPS2|RPL15|RPS11|RPL19|RPL21|RPLP0|RPS17|RPS3|RPS9|RPS8|RPL31|RPS13|RPLP2|RPS23|RPL12|RPL11|RPS7|RPS6|RPS5|RPL26|RPL18|RPS16	39	0.6303716608594657	GO_CATABOLIC_PROCESS (Geneset_Overlap_Data Set 1) GO_PROTEIN_TARGETING_TO_MEMBRANE	false	Geneset_Overlap	GO_CATABOLIC_PROCESS (Geneset_Overlap_Data Set 1) GO_PROTEIN_TARGETING_TO_MEMBRANE
RPS29|RPL10A|RPS18|RPL7|RPS19|RPS14|RPL22|RPS4X|RPS15A|RPS3A|RPL27|RPS25|RPS12|RPL6|RPL13A|RPL23|RPSA|RPS2|RPL15|RPS11|RPL19|RPL21|RPLP0|RPS17|RPS3|RPS9|RPS8|RPL31|RPS13|RPLP2|RPS23|RPL12|RPL11|RPS7|RPS6|RPS5|RPL26|RPL18|RPS16	39	0.6058321220930232	GO_CATABOLIC_PROCESS (Geneset_Overlap_Data Set 1) GO_RIBOSOME_BIOGENESIS	false	Geneset_Overlap	GO_CATABOLIC_PROCESS (Geneset_Overlap_Data Set 1) GO_RIBOSOME_BIOGENESIS
RPS29|RPL10A|RPS18|RPL7|RPS19|RPS14|RPL22|KHSRP|RPS4X|RPS15A|RPS3A|RPL27|RPS25|RPS12|RPL6|RPL13A|RPL23|RPSA|RPS2|RPL15|RPS11|RPL19|RPL21|RPLP0|RPS17|PABPC1|RPS3|RPS9|RPS8|RPL31|RPS13|HNRNPD|RPLP2|RPS23|RPL12|RPL11|RPS7|RPS6|RPS5|RPL26|RPL18|RPS16	42	0.5517819706498952	GO_CATABOLIC_PROCESS (Geneset_Overlap_Data Set 1) GO_MRNA_METABOLIC_PROCESS	false	Geneset_Overlap	GO_CATABOLIC_PROCESS (Geneset_Overlap_Data Set 1) GO_MRNA_METABOLIC_PROCESS
RPS29|RPL10A|RPS18|RPL7|RPS19|RPS14|RPL22|RPS4X|RPS15A|RPS3A|RPL27|RPS25|RPS12|RPL6|RPL13A|RPL23|RPSA|RPS2|RPL15|RPS11|RPL19|RPL21|RPLP0|RPS17|RPS3|RPS9|RPS8|RPL31|RPS13|RPLP2|RPS23|RPL12|RPL11|RPS7|RPS6|RPS5|RPL26|RPL18|RPS16	39	0.657258064516129	GO_CATABOLIC_PROCESS (Geneset_Overlap_Data Set 1) GO_ESTABLISHMENT_OF_PROTEIN_LOCALIZATION_TO_ENDOPLASMIC_RETICULUM	false	Geneset_Overlap	GO_CATABOLIC_PROCESS (Geneset_Overlap_Data Set 1) GO_ESTABLISHMENT_OF_PROTEIN_LOCALIZATION_TO_ENDOPLASMIC_RETICULUM
STX1B|ITGB1|VDAC2|SNCA|SV2A|SYN1|RAB11B|VDAC1|SYT1|VAMP2|STX1A|STXBP1|RAB7A	13	0.39541666666666664	GO_SECRETORY_VESICLE (Geneset_Overlap_Data Set 1) GO_SYNAPSE_PART	false	Geneset_Overlap	GO_SECRETORY_VESICLE (Geneset_Overlap_Data Set 1) GO_SYNAPSE_PART
STX1B|ITGB1|VDAC2|SNCA|SV2A|SYN1|RAB11B|VDAC1|SYT1|VAMP2|STX1A|STXBP1|RAB7A	13	0.3760714285714286	GO_SECRETORY_VESICLE (Geneset_Overlap_Data Set 1) GO_SYNAPSE	false	Geneset_Overlap	GO_SECRETORY_VESICLE (Geneset_Overlap_Data Set 1) GO_SYNAPSE
STX1B|ITGB1|SOD1|VDAC2|SNCA|DPYSL3|GARS|SV2A|CLIP2|SYN1|RAB11B|VDAC1|SYT1|VAMP2|STX1A|STXBP1|MYO5A|RAB7A	18	0.46843373493975904	GO_SECRETORY_VESICLE (Geneset_Overlap_Data Set 1) GO_NEURON_PART	false	Geneset_Overlap	GO_SECRETORY_VESICLE (Geneset_Overlap_Data Set 1) GO_NEURON_PART
STX1B|VDAC2|SNCA|SV2A|SYN1|RAB11B|VDAC1|SYT1|VAMP2|STX1A|STXBP1|RAB7A	12	0.5268817204301075	GO_SECRETORY_VESICLE (Geneset_Overlap_Data Set 1) GO_PRESYNAPSE	false	Geneset_Overlap	GO_SECRETORY_VESICLE (Geneset_Overlap_Data Set 1) GO_PRESYNAPSE
RPL23|UBE2N|RPSA|RPL15|RPS2|RPS11|UBA1|RPL19|RPL21|RPLP0|RPS17|PABPC1|GOT2|PRDX1|HSD17B10|RPL7|RPS18|RPL10A|RPS19|RPS14|KHSRP|RPL22|RPS4X|VCP|RPS15A|RPS3A|RPL27|RPS25|RPS12|RPL6|RPL13A|RPS7|HADHB|RPS6|RPS5|RPL26|RPS16|RPS3|RPS9|RPS8|RPL31|HNRNPD|RPS13|HMGB1|RPS23|RPL12|KPNB1|RPL11	48	0.37758802199087615	GO_POLY_A_RNA_BINDING (Geneset_Overlap_Data Set 1) GO_CELLULAR_CATABOLIC_PROCESS	false	Geneset_Overlap	GO_POLY_A_RNA_BINDING (Geneset_Overlap_Data Set 1) GO_CELLULAR_CATABOLIC_PROCESS
RPL23|RPSA|RPL15|RPS2|RPS11|RPL19|RPL21|RPLP0|RPS17|RPL7|RPS18|RPL10A|RPS19|RPS14|RPL22|RPS4X|CCT4|RPS15A|RPS3A|RPL27|RPS25|RPS12|RPL6|RPL13A|RPS7|RPS6|RPS5|TCP1|RPL26|CCT3|RPS16|RPS3|RPS9|RPS8|RPL31|RPS13|RPS23|RPL12|RPL11	39	0.5408895265423243	GO_POLY_A_RNA_BINDING (Geneset_Overlap_Data Set 1) GO_CYTOSOLIC_PART	false	Geneset_Overlap	GO_POLY_A_RNA_BINDING (Geneset_Overlap_Data Set 1) GO_CYTOSOLIC_PART
RPL23|RPSA|EIF3A|RPL15|RPS2|RPS11|RPL19|RPL21|RPLP0|RPS17|PABPC1|EEF2|RPL7|RPS18|RPL10A|RPS19|RPS14|RPL22|FASN|RPS4X|RPS15A|RPS3A|RPL27|RPS25|RPS12|RPL6|RPL13A|RPS7|EEF1A1|TUFM|RPS6|RPS5|RPL26|RPS16|RPS3|EIF5A|RPS9|RPS8|RPL31|RPS13|RPS23|RPL12|EIF3C|RPL11	44	0.5398950131233595	GO_POLY_A_RNA_BINDING (Geneset_Overlap_Data Set 1) GO_CELLULAR_AMIDE_METABOLIC_PROCESS	false	Geneset_Overlap	GO_POLY_A_RNA_BINDING (Geneset_Overlap_Data Set 1) GO_CELLULAR_AMIDE_METABOLIC_PROCESS
RPL23|RPL15|RPL19|RPL21|RPLP0|RPL7|RPL10A|RPL22|RPL27|RPL6|RPL13A|RPL26|RPL31|RPL12|RPL11	15	0.5075481520041645	GO_POLY_A_RNA_BINDING (Geneset_Overlap_Data Set 1) GO_LARGE_RIBOSOMAL_SUBUNIT	false	Geneset_Overlap	GO_POLY_A_RNA_BINDING (Geneset_Overlap_Data Set 1) GO_LARGE_RIBOSOMAL_SUBUNIT
RPL23|RPSA|EIF3A|RPL15|RPS2|RPS11|RPL19|RPL21|RPLP0|RPS17|PABPC1|EEF2|RPL7|RPS18|RPL10A|RPS19|RPS14|RPL22|RPS4X|RPS15A|RPS3A|RPL27|RPS25|RPS12|RPL6|RPL13A|RPS7|EEF1A1|TUFM|RPS6|RPS5|RPL26|RPS16|RPS3|EIF5A|RPS9|RPS8|RPL31|RPS13|RPS23|RPL12|EIF3C|RPL11	43	0.557315668202765	GO_POLY_A_RNA_BINDING (Geneset_Overlap_Data Set 1) GO_PEPTIDE_METABOLIC_PROCESS	false	Geneset_Overlap	GO_POLY_A_RNA_BINDING (Geneset_Overlap_Data Set 1) GO_PEPTIDE_METABOLIC_PROCESS
SYNCRIP|C1QBP|RPL23|RPSA|EIF3A|RPL15|RPS2|RPS11|RPL19|RPL21|PPIA|HSP90AB1|RPLP0|RPS17|SND1|YWHAE|RPL7|RPS18|RPL10A|RPS19|RPS14|RPL22|RPS4X|VCP|RPS15A|RPS3A|RPL27|RPS25|RPS12|RPL6|RPL13A|RPS7|HSPA8|HNRNPK|RPS6|RPS5|TCP1|HSPD1|RPL26|HNRNPA1|RPS16|RPS3|RPS9|RPS8|RPL31|RPS13|NPM1|RAN|RPS23|RPL12|PPIB|KPNB1|RPL11	53	0.5072203708450824	GO_POLY_A_RNA_BINDING (Geneset_Overlap_Data Set 1) GO_INTERSPECIES_INTERACTION_BETWEEN_ORGANISMS	false	Geneset_Overlap	GO_POLY_A_RNA_BINDING (Geneset_Overlap_Data Set 1) GO_INTERSPECIES_INTERACTION_BETWEEN_ORGANISMS
SYNCRIP|C1QBP|RPL23|RPSA|RPL15|RPS2|RPS11|RPL19|RPL21|RPLP0|RPS17|PABPC1|RPL7|RPS18|RPL10A|RPS19|RPS14|KHSRP|RPL22|RPS4X|RPS15A|RPS3A|RPL27|RPS25|RPS12|RPL6|RPL13A|HNRNPF|RPS7|HNRNPA2B1|HSPA8|HNRNPK|HNRNPL|RPS6|ELAVL1|RPS5|RPL26|HNRNPA1|RPS16|RPS3|HNRNPA3|RPS9|RPS8|RPL31|HNRNPC|HNRNPD|RPS13|RPS23|RPL12|RPL11	50	0.6909963588215823	GO_POLY_A_RNA_BINDING (Geneset_Overlap_Data Set 1) GO_MRNA_METABOLIC_PROCESS	false	Geneset_Overlap	GO_POLY_A_RNA_BINDING (Geneset_Overlap_Data Set 1) GO_MRNA_METABOLIC_PROCESS
RPL23|RPSA|RPL15|RPS2|RPS11|RPL19|RPL21|RPLP0|RPS17|RPL7|RPS18|RPL10A|RPS19|RPS14|RPL22|RPS4X|RPS15A|RPS3A|RPL27|RPS12|RPL6|RPL13A|RPS7|RPS6|RPS5|RPL26|RPS16|RPS3|RPS9|RPS8|RPL31|RPS13|RPS23|RPL12|RPL11	35	0.5764019178653325	GO_POLY_A_RNA_BINDING (Geneset_Overlap_Data Set 1) GO_STRUCTURAL_CONSTITUENT_OF_RIBOSOME	false	Geneset_Overlap	GO_POLY_A_RNA_BINDING (Geneset_Overlap_Data Set 1) GO_STRUCTURAL_CONSTITUENT_OF_RIBOSOME
RPL23|RPSA|RPL15|RPS2|RPS11|RPL19|RPL21|RPLP0|RPS17|RPL7|RPS18|RPL10A|RPS19|RPS14|RPL22|RPS4X|RPS15A|RPS3A|RPL27|RPS25|RPS12|RPL6|RPL13A|RPS7|RPS6|RPS5|RPL26|RPS16|RPS3|RPS9|RPS8|RPL31|RPS13|RPS23|RPL12|RPL11	36	0.6194331983805668	GO_POLY_A_RNA_BINDING (Geneset_Overlap_Data Set 1) GO_ESTABLISHMENT_OF_PROTEIN_LOCALIZATION_TO_ENDOPLASMIC_RETICULUM	false	Geneset_Overlap	GO_POLY_A_RNA_BINDING (Geneset_Overlap_Data Set 1) GO_ESTABLISHMENT_OF_PROTEIN_LOCALIZATION_TO_ENDOPLASMIC_RETICULUM
RPL23|UBE2N|RPSA|RPL15|RPS2|RPS11|UBA1|RPL19|RPL21|RPLP0|RPS17|PABPC1|RPL7|RPS18|RPL10A|RPS19|RPS14|KHSRP|RPL22|RPS4X|VCP|RPS15A|RPS3A|RPL27|RPS25|RPS12|RPL6|RPL13A|RPS7|RPS6|RPS5|RPL26|RPS16|RPS3|RPS9|RPS8|RPL31|HNRNPD|RPS13|HMGB1|RPS23|RPL12|KPNB1|RPL11	44	0.5184371184371184	GO_POLY_A_RNA_BINDING (Geneset_Overlap_Data Set 1) GO_MACROMOLECULE_CATABOLIC_PROCESS	false	Geneset_Overlap	GO_POLY_A_RNA_BINDING (Geneset_Overlap_Data Set 1) GO_MACROMOLECULE_CATABOLIC_PROCESS
SYNCRIP|C1QBP|RPL23|RPSA|RPL15|RPS2|RPS11|RPL19|RPL21|RPLP0|RPS17|PABPC1|HSD17B10|RPL7|RPS18|RPL10A|RPS19|RPS14|KHSRP|RPL22|RPS4X|RPS15A|RPS3A|RPL27|RPS25|RPS12|RPL6|RPL13A|HNRNPF|RPS7|HNRNPA2B1|HSPA8|HNRNPK|HNRNPL|RPS6|ELAVL1|RPS5|RPL26|HNRNPA1|RPS16|RPS3|HNRNPA3|RPS9|RPS8|RPL31|HNRNPC|HNRNPD|RPS13|RPS23|RPL12|RPL11	51	0.6853754940711463	GO_POLY_A_RNA_BINDING (Geneset_Overlap_Data Set 1) GO_RNA_PROCESSING	false	Geneset_Overlap	GO_POLY_A_RNA_BINDING (Geneset_Overlap_Data Set 1) GO_RNA_PROCESSING
RPL23|RPSA|RPL15|RPS2|RPS11|RPL19|RPL21|RPLP0|RPS17|RPL7|RPS18|RPL10A|RPS19|RPS14|RPL22|RPS4X|RPS15A|RPS3A|RPL27|RPS25|RPS12|RPL6|RPL13A|RPS7|HSPA8|RPS6|RPS5|RPL26|HSP90AA1|RPS16|RPS3|RPS9|RPS8|RPL31|RPS13|RAN|RPS23|RPL12|KPNB1|RPL11	40	0.5560912889746062	GO_POLY_A_RNA_BINDING (Geneset_Overlap_Data Set 1) GO_ESTABLISHMENT_OF_PROTEIN_LOCALIZATION_TO_ORGANELLE	false	Geneset_Overlap	GO_POLY_A_RNA_BINDING (Geneset_Overlap_Data Set 1) GO_ESTABLISHMENT_OF_PROTEIN_LOCALIZATION_TO_ORGANELLE
RPL23|RPSA|RPL15|RPS2|RPS11|RPL19|RPL21|RPLP0|RPS17|PABPC1|RPL7|RPS18|RPL10A|RPS19|RPS14|KHSRP|RPL22|RPS4X|RPS15A|RPS3A|RPL27|RPS25|RPS12|RPL6|RPL13A|RPS7|RPS6|RPS5|RPL26|RPS16|RPS3|RPS9|RPS8|RPL31|HNRNPD|RPS13|RPS23|RPL12|RPL11	39	0.6353383458646616	GO_POLY_A_RNA_BINDING (Geneset_Overlap_Data Set 1) GO_RNA_CATABOLIC_PROCESS	false	Geneset_Overlap	GO_POLY_A_RNA_BINDING (Geneset_Overlap_Data Set 1) GO_RNA_CATABOLIC_PROCESS
RPL23|RPSA|RPL15|RPS2|RPS11|RPL19|RPL21|RPLP0|RPS17|RPL7|RPS18|RPL10A|RPS19|RPS14|RPL22|RPS4X|RPS15A|RPS3A|RPL27|RPS25|RPS12|RPL6|RPL13A|RPS7|RPS6|RPS5|RPL26|RPS16|RPS3|RPS9|RPS8|RPL31|RPS13|RPS23|RPL12|RPL11	36	0.6194331983805668	GO_POLY_A_RNA_BINDING (Geneset_Overlap_Data Set 1) GO_RRNA_METABOLIC_PROCESS	false	Geneset_Overlap	GO_POLY_A_RNA_BINDING (Geneset_Overlap_Data Set 1) GO_RRNA_METABOLIC_PROCESS
RPL23|RPSA|EIF3A|RPL15|RPS2|RPS11|RPL19|RPL21|RPLP0|RPS17|PABPC1|GOT2|EEF2|RPL7|RPS18|RPL10A|RPS19|RPS14|RPL22|RPS4X|ATP5A1|RPS15A|RPS3A|RPL27|RPS25|RPS12|RPL6|RPL13A|RPS7|EEF1A1|TUFM|RPS6|RPS5|RPL26|RPS16|RPS3|EIF5A|RPS9|RPS8|RPL31|RPS13|ALDOA|RPS23|RPL12|EIF3C|RPL11	46	0.4557109557109557	GO_POLY_A_RNA_BINDING (Geneset_Overlap_Data Set 1) GO_ORGANONITROGEN_COMPOUND_BIOSYNTHETIC_PROCESS	false	Geneset_Overlap	GO_POLY_A_RNA_BINDING (Geneset_Overlap_Data Set 1) GO_ORGANONITROGEN_COMPOUND_BIOSYNTHETIC_PROCESS
RPL23|RPSA|EIF3A|RPL15|RPS2|RPS11|RPL19|RPL21|RPLP0|RPS17|RPL7|RPS18|RPL10A|RPS19|RPS14|RPL22|RPS4X|RPS15A|RPS3A|RPL27|RPS25|RPS12|RPL6|RPL13A|RPS7|RPS6|RPS5|RPL26|RPS16|RPS3|RPS9|RPS8|RPL31|RPS13|RPS23|RPL12|RPL11	37	0.624780701754386	GO_POLY_A_RNA_BINDING (Geneset_Overlap_Data Set 1) GO_MULTI_ORGANISM_METABOLIC_PROCESS	false	Geneset_Overlap	GO_POLY_A_RNA_BINDING (Geneset_Overlap_Data Set 1) GO_MULTI_ORGANISM_METABOLIC_PROCESS
RPL23|RPSA|RPL15|RPS2|RPS11|RPL19|RPL21|RPLP0|RPS17|HSD17B10|RPL7|RPS18|RPL10A|RPS19|RPS14|RPL22|RPS4X|RPS15A|RPS3A|RPL27|RPS25|RPS12|RPL6|RPL13A|RPS7|HNRNPA2B1|RPS6|RPS5|RPL26|RPS16|RPS3|RPS9|RPS8|RPL31|RPS13|RPS23|RPL12|RPL11	38	0.6175983436853002	GO_POLY_A_RNA_BINDING (Geneset_Overlap_Data Set 1) GO_NCRNA_METABOLIC_PROCESS	false	Geneset_Overlap	GO_POLY_A_RNA_BINDING (Geneset_Overlap_Data Set 1) GO_NCRNA_METABOLIC_PROCESS
RPL23|RPSA|RPL15|RPS2|RPS11|RPL19|RPL21|RPLP0|RPS17|RPL7|RPS18|RPL10A|RPS19|RPS14|RPL22|RPS4X|RPS15A|RPS3A|RPL27|RPS25|RPS12|RPL6|RPL13A|RPS7|RPS6|RPS5|RPL26|RPS16|RPS3|RPS9|RPS8|RPL31|RPS13|RPS23|RPL12|RPL11	36	0.6065217391304348	GO_POLY_A_RNA_BINDING (Geneset_Overlap_Data Set 1) GO_RIBOSOMAL_SUBUNIT	false	Geneset_Overlap	GO_POLY_A_RNA_BINDING (Geneset_Overlap_Data Set 1) GO_RIBOSOMAL_SUBUNIT
RPL23|RPSA|RPL15|RPS2|RPS11|RPL19|RPL21|RPLP0|RPS17|EEF2|RPL7|RPS18|RPL10A|RPS19|RPS14|RPL22|RPS4X|RPS15A|RPS3A|RPL27|RPS25|RPS12|RPL6|RPL13A|RPS7|RPS6|RPS5|RPL26|CANX|RPS16|RPS3|RPS9|RPS8|RPL31|RPS13|RPS23|RPL12|RPL11	38	0.605653568564555	GO_POLY_A_RNA_BINDING (Geneset_Overlap_Data Set 1) GO_RIBOSOME	false	Geneset_Overlap	GO_POLY_A_RNA_BINDING (Geneset_Overlap_Data Set 1) GO_RIBOSOME
RPL23|RPSA|EIF3A|RPL15|RPS2|RPS11|RPL19|RPL21|RPLP0|RPS17|PABPC1|EEF2|RPL7|RPS18|RPL10A|RPS19|RPS14|RPL22|RPS4X|RPS15A|RPS3A|RPL27|RPS25|RPS12|RPL6|RPL13A|RPS7|EEF1A1|TUFM|RPS6|RPS5|RPL26|RPS16|RPS3|EIF5A|RPS9|RPS8|RPL31|RPS13|RPS23|RPL12|EIF3C|RPL11	43	0.6022408963585434	GO_POLY_A_RNA_BINDING (Geneset_Overlap_Data Set 1) GO_AMIDE_BIOSYNTHETIC_PROCESS	false	Geneset_Overlap	GO_POLY_A_RNA_BINDING (Geneset_Overlap_Data Set 1) GO_AMIDE_BIOSYNTHETIC_PROCESS
C1QBP|RPL23|RPSA|EIF3A|RPL15|RPS2|RPS11|RPL19|RPL21|RPLP0|RPS17|RPL7|RPS18|RPL10A|RPS19|RPS14|RPL22|RPS4X|DYNC1H1|RPS15A|RPS3A|RPL27|RPS25|RPS12|RPL6|RPL13A|RPS7|RPS6|RPS5|RPL26|RPS16|RPS3|RPS9|RPS8|RPL31|RPS13|NPM1|RAN|RPS23|RPL12|EIF3C|RPL11	42	0.6391304347826087	GO_POLY_A_RNA_BINDING (Geneset_Overlap_Data Set 1) GO_RIBONUCLEOPROTEIN_COMPLEX_BIOGENESIS	false	Geneset_Overlap	GO_POLY_A_RNA_BINDING (Geneset_Overlap_Data Set 1) GO_RIBONUCLEOPROTEIN_COMPLEX_BIOGENESIS
SYNCRIP|C1QBP|RPS2|RPL7|RPS14|KHSRP|RPL13A|HNRNPA2B1|HNRNPK|ELAVL1|RPS5|HSP90AA1|RPS3|HNRNPA3|HNRNPC|HNRNPD|NCL|RPS13	18	0.5810810810810811	GO_POLY_A_RNA_BINDING (Geneset_Overlap_Data Set 1) GO_MRNA_BINDING	false	Geneset_Overlap	GO_POLY_A_RNA_BINDING (Geneset_Overlap_Data Set 1) GO_MRNA_BINDING
C1QBP|RPL23|UBE2N|EIF3A|RPS2|RPS11|RPL19|RPL21|PPP1CC|RPL7|RPL10A|RPS19|RPS14|RPS3A|RPS25|RPL13A|RPS7|HSPA8|EEF1A1|RPS6|HSPA9|RPS3|RPS9|NCL|RPS13|NPM1|RAN|RPS23|RPL12|RPL11	30	0.5096153846153846	GO_POLY_A_RNA_BINDING (Geneset_Overlap_Data Set 1) GO_NUCLEOLUS	false	Geneset_Overlap	GO_POLY_A_RNA_BINDING (Geneset_Overlap_Data Set 1) GO_NUCLEOLUS
C1QBP|RPL23|RPSA|RPL15|RPS2|RPS11|RPL19|RPL21|RPLP0|RPS17|RPL7|RPS18|RPL10A|RPS19|RPS14|RPL22|RPS4X|RPS15A|RPS3A|RPL27|RPS25|RPS12|RPL6|RPL13A|RPS7|RPS6|RPS5|RPL26|RPS16|RPS3|RPS9|RPS8|RPL31|RPS13|NPM1|RAN|RPS23|RPL12|RPL11	39	0.6230535894843275	GO_POLY_A_RNA_BINDING (Geneset_Overlap_Data Set 1) GO_RIBOSOME_BIOGENESIS	false	Geneset_Overlap	GO_POLY_A_RNA_BINDING (Geneset_Overlap_Data Set 1) GO_RIBOSOME_BIOGENESIS
RPL23|RPSA|RPL15|RPS2|RPS11|RPL19|RPL21|RPLP0|RPS17|PABPC1|RPL7|RPS18|RPL10A|RPS19|RPS14|RPL22|RPS4X|RPS15A|RPS3A|RPL27|RPS25|RPS12|RPL6|RPL13A|RPS7|RPS6|RPS5|RPL26|RPS16|RPS3|RPS9|RPS8|RPL31|RPS13|RPS23|RPL12|RPL11	37	0.624780701754386	GO_POLY_A_RNA_BINDING (Geneset_Overlap_Data Set 1) GO_NUCLEAR_TRANSCRIBED_MRNA_CATABOLIC_PROCESS_NONSENSE_MEDIATED_DECAY	false	Geneset_Overlap	GO_POLY_A_RNA_BINDING (Geneset_Overlap_Data Set 1) GO_NUCLEAR_TRANSCRIBED_MRNA_CATABOLIC_PROCESS_NONSENSE_MEDIATED_DECAY
RPL23|RPSA|RPL15|RPS2|RPS11|RPL19|RPL21|RPLP0|RPS17|HSD17B10|RPL7|RPS18|RPL10A|RPS19|RPS14|RPL22|RPS4X|RPS15A|RPS3A|RPL27|RPS25|RPS12|RPL6|RPL13A|RPS7|HNRNPA2B1|RPS6|RPS5|RPL26|RPS16|RPS3|RPS9|RPS8|RPL31|RPS13|RPS23|RPL12|RPL11	38	0.6300813008130082	GO_POLY_A_RNA_BINDING (Geneset_Overlap_Data Set 1) GO_NCRNA_PROCESSING	false	Geneset_Overlap	GO_POLY_A_RNA_BINDING (Geneset_Overlap_Data Set 1) GO_NCRNA_PROCESSING
RPL23|ANXA2|RPSA|RPL15|RPS2|RPS11|RPL19|RPL21|RPLP0|RPS17|RPL7|RPS18|RPL10A|RPS19|RPS14|RPL22|RPS4X|RPS15A|RPS3A|RPL27|RPS25|RPS12|RPL6|RPL13A|RPS7|RPS6|RPS5|RPL26|HSP90AA1|RPS16|RPS3|RPS9|RPS8|RPL31|RPS13|RPS23|RPL12|MYO5A|STXBP1|RPL11	40	0.5223665223665224	GO_POLY_A_RNA_BINDING (Geneset_Overlap_Data Set 1) GO_PROTEIN_LOCALIZATION_TO_MEMBRANE	false	Geneset_Overlap	GO_POLY_A_RNA_BINDING (Geneset_Overlap_Data Set 1) GO_PROTEIN_LOCALIZATION_TO_MEMBRANE
RPL23|YWHAG|ANXA2|RPSA|RPL15|RPS2|RPS11|RPL19|RPL21|RPLP0|RPS17|YWHAE|RPL7|RPS18|RPL10A|RPS19|RPS14|RPL22|RPS4X|VCP|RPS15A|RPS3A|RPL27|RPS25|RPS12|RPL6|RPL13A|RPS7|HSPA8|RPS6|RPS5|RPL26|HSP90AA1|HSPA9|RPS16|RPS3|CLTC|EIF5A|RPS9|RPS8|RPL31|RPS13|NPM1|RAN|RPS23|RPL12|KPNB1|RPL11	48	0.4582001682085786	GO_POLY_A_RNA_BINDING (Geneset_Overlap_Data Set 1) GO_INTRACELLULAR_PROTEIN_TRANSPORT	false	Geneset_Overlap	GO_POLY_A_RNA_BINDING (Geneset_Overlap_Data Set 1) GO_INTRACELLULAR_PROTEIN_TRANSPORT
RPL23|ANXA2|RPSA|RPL15|RPS2|RPS11|RPL19|RPL21|RPLP0|RPS17|RPL7|RPS18|RPL10A|RPS19|RPS14|RPL22|RPS4X|RPS15A|RPS3A|RPL27|RPS25|RPS12|RPL6|RPL13A|RPS7|RPS6|RPS5|RPL26|RPS16|RPS3|RPS9|RPS8|RPL31|RPS13|RPS23|RPL12|RPL11	37	0.6120890774125133	GO_POLY_A_RNA_BINDING (Geneset_Overlap_Data Set 1) GO_PROTEIN_TARGETING_TO_MEMBRANE	false	Geneset_Overlap	GO_POLY_A_RNA_BINDING (Geneset_Overlap_Data Set 1) GO_PROTEIN_TARGETING_TO_MEMBRANE
RPL23|YWHAG|ANXA2|RPSA|RPL15|RPS2|RPS11|RPL19|RPL21|RPLP0|RPS17|YWHAE|RPL7|RPS18|RPL10A|RPS19|RPS14|RPL22|RPS4X|RPS15A|RPS3A|RPL27|RPS25|RPS12|RPL6|RPL13A|RPS7|HSPA8|RPS6|RPS5|RPL26|HSP90AA1|RPS16|RPS3|RPS9|RPS8|RPL31|RPS13|RAN|RPS23|RPL12|KPNB1|RPL11	43	0.5657058388765706	GO_POLY_A_RNA_BINDING (Geneset_Overlap_Data Set 1) GO_PROTEIN_TARGETING	false	Geneset_Overlap	GO_POLY_A_RNA_BINDING (Geneset_Overlap_Data Set 1) GO_PROTEIN_TARGETING
RPL23|ANXA2|RPSA|RPL15|RPS2|RPS11|RPL19|RPL21|RPLP0|RPS17|RPL7|RPS18|RPL10A|RPS19|RPS14|RPL22|RPS4X|RPS15A|RPS3A|RPL27|RPS25|RPS12|RPL6|RPL13A|RPS7|RPS6|RPS5|RPL26|HSP90AA1|RPS16|RPS3|RPS9|RPS8|RPL31|RPS13|RPS23|RPL12|RPL11	38	0.5344715447154471	GO_POLY_A_RNA_BINDING (Geneset_Overlap_Data Set 1) GO_ESTABLISHMENT_OF_PROTEIN_LOCALIZATION_TO_MEMBRANE	false	Geneset_Overlap	GO_POLY_A_RNA_BINDING (Geneset_Overlap_Data Set 1) GO_ESTABLISHMENT_OF_PROTEIN_LOCALIZATION_TO_MEMBRANE
CTNNB1|SYT1|SNCB|STX1B|HSPA8|SNCA|SLC1A3|CADPS|VDAC1|STX1A|VAMP2|STXBP1|RAB11B|SYN1	14	0.4212962962962963	GO_CELL_CELL_SIGNALING (Geneset_Overlap_Data Set 1) GO_SYNAPSE	false	Geneset_Overlap	GO_CELL_CELL_SIGNALING (Geneset_Overlap_Data Set 1) GO_SYNAPSE
SYT1|SNCB|STX1B|HSPA8|SNCA|CADPS|VDAC1|STX1A|VAMP2|STXBP1|RAB11B|SYN1	12	0.5333333333333333	GO_CELL_CELL_SIGNALING (Geneset_Overlap_Data Set 1) GO_PRESYNAPSE	false	Geneset_Overlap	GO_CELL_CELL_SIGNALING (Geneset_Overlap_Data Set 1) GO_PRESYNAPSE
CTNNB1|SYT1|SNCB|STX1B|APOE|HSPA8|SNCA|SLC1A3|CADPS|VDAC1|STX1A|SLC6A1|VAMP2|MYO5A|STXBP1|GNB1|GNAQ|RAB11B|SYN1	19	0.5131172839506173	GO_CELL_CELL_SIGNALING (Geneset_Overlap_Data Set 1) GO_NEURON_PART	false	Geneset_Overlap	GO_CELL_CELL_SIGNALING (Geneset_Overlap_Data Set 1) GO_NEURON_PART
CTNNB1|SYT1|SNCB|APOE|SNCA|SLC1A3|STX1A|SLC6A1|VAMP2|MYO5A|STXBP1|GNB1|GNAQ|SYN1	14	0.38626126126126126	GO_CELL_CELL_SIGNALING (Geneset_Overlap_Data Set 1) GO_NEURON_PROJECTION	false	Geneset_Overlap	GO_CELL_CELL_SIGNALING (Geneset_Overlap_Data Set 1) GO_NEURON_PROJECTION
SNAP91|CTNNB1|SYT1|GLS|SNCB|STX1B|APOE|HSPA8|SNCA|SLC1A3|CADPS|VDAC1|STX1A|SLC6A1|VAMP2|MYO5A|STXBP1|RTN3|GNB1|GNAQ|SYN1|RAC1	22	0.9583333333333333	GO_CELL_CELL_SIGNALING (Geneset_Overlap_Data Set 1) GO_SYNAPTIC_SIGNALING	false	Geneset_Overlap	GO_CELL_CELL_SIGNALING (Geneset_Overlap_Data Set 1) GO_SYNAPTIC_SIGNALING
SYT1|SNCB|STX1B|HSPA8|SNCA|SLC1A3|CADPS|VDAC1|STX1A|VAMP2|STXBP1|RAB11B|SYN1	13	0.4091312056737588	GO_CELL_CELL_SIGNALING (Geneset_Overlap_Data Set 1) GO_SYNAPSE_PART	false	Geneset_Overlap	GO_CELL_CELL_SIGNALING (Geneset_Overlap_Data Set 1) GO_SYNAPSE_PART
RPL27|RPS3|RPS7|RPS14|RPS29|RPSA|RPL19|RPS19|RPL21|RPS13|RPS3A|RPS17|RPS12|RPS2|RPL15|RPL26|RPS8|RPL23|RPL22|RPLP2|RPS25|RPLP0|RPL10A|RPL18|RPS23|RPL7|RPS18|RPS11|RPL31|RPS6|RPL13A|RPL6|RPL11|RPS15A|RPS4X|RPS9|RPS5|RPS16|RPL12	39	0.8296052631578947	GO_PROTEIN_LOCALIZATION_TO_ENDOPLASMIC_RETICULUM (Geneset_Overlap_Data Set 1) GO_PEPTIDE_METABOLIC_PROCESS	false	Geneset_Overlap	GO_PROTEIN_LOCALIZATION_TO_ENDOPLASMIC_RETICULUM (Geneset_Overlap_Data Set 1) GO_PEPTIDE_METABOLIC_PROCESS
RPL27|RPS3|RPS7|RPS14|RPS29|RPSA|RPL19|RPS19|RPL21|RPS13|RPS3A|RPS17|RPS12|RPS2|RPL15|RPL26|RPS8|RPL23|RPL22|RPLP2|RPLP0|RPL10A|RPL18|RPS23|RPL7|RPS18|RPS11|RPL31|RPS6|RPL13A|RPL6|RPL11|RPS15A|RPS4X|RPS9|RPS5|RPS16|RPL12	38	0.916860465116279	GO_PROTEIN_LOCALIZATION_TO_ENDOPLASMIC_RETICULUM (Geneset_Overlap_Data Set 1) GO_STRUCTURAL_CONSTITUENT_OF_RIBOSOME	false	Geneset_Overlap	GO_PROTEIN_LOCALIZATION_TO_ENDOPLASMIC_RETICULUM (Geneset_Overlap_Data Set 1) GO_STRUCTURAL_CONSTITUENT_OF_RIBOSOME
RPL27|RPS3|RPS7|RPS14|RPS29|RPSA|RPL19|RPS19|RPL21|RPS13|RPS3A|RPS17|RPS12|RPS2|RPL15|RPL26|RPS8|RPL23|RPL22|RPLP2|RPS25|RPLP0|RPL10A|RPL18|RPS23|RPL7|RPS18|VAPA|RPS11|RPL31|RPS6|RPL13A|RPL6|RPL11|RPS15A|RPS4X|RPS9|RPS5|RPS16|RPL12	40	0.7409638554216867	GO_PROTEIN_LOCALIZATION_TO_ENDOPLASMIC_RETICULUM (Geneset_Overlap_Data Set 1) GO_INTERSPECIES_INTERACTION_BETWEEN_ORGANISMS	false	Geneset_Overlap	GO_PROTEIN_LOCALIZATION_TO_ENDOPLASMIC_RETICULUM (Geneset_Overlap_Data Set 1) GO_INTERSPECIES_INTERACTION_BETWEEN_ORGANISMS
RPL27|RPS3|RPS7|RPS14|RPS29|RPSA|RPL19|RPS19|RPL21|RPS13|RPS3A|RPS17|RPS12|RPS2|RPL15|RPL26|RPS8|RPL23|RPL22|RPLP2|RPS25|RPLP0|RPL10A|RPL18|RPS23|RPL7|RPS18|RPS11|RPL31|RPS6|RPL13A|RPL6|RPL11|RPS15A|RPS4X|RPS9|RPS5|RPS16|RPL12	39	0.8486111111111111	GO_PROTEIN_LOCALIZATION_TO_ENDOPLASMIC_RETICULUM (Geneset_Overlap_Data Set 1) GO_MRNA_METABOLIC_PROCESS	false	Geneset_Overlap	GO_PROTEIN_LOCALIZATION_TO_ENDOPLASMIC_RETICULUM (Geneset_Overlap_Data Set 1) GO_MRNA_METABOLIC_PROCESS
RPL27|RPS3|RPS7|RPS14|RPS29|RPSA|RPL19|RPS19|RPL21|RPS13|RPS3A|RPS17|RPS12|RPS2|RPL15|RPL26|RPS8|RPL23|RPL22|RPLP2|RPS25|RPLP0|RPL10A|RPL18|RPS23|RPL7|RPS18|RPS11|RPL31|RPS6|RPL13A|RPL6|RPL11|RPS15A|RPS4X|RPS9|RPS5|RPS16|RPL12	39	0.675	GO_PROTEIN_LOCALIZATION_TO_ENDOPLASMIC_RETICULUM (Geneset_Overlap_Data Set 1) GO_CELLULAR_CATABOLIC_PROCESS	false	Geneset_Overlap	GO_PROTEIN_LOCALIZATION_TO_ENDOPLASMIC_RETICULUM (Geneset_Overlap_Data Set 1) GO_CELLULAR_CATABOLIC_PROCESS
RPL27|RPS3|RPS7|RPS14|RPS29|RPSA|RPL19|RPS19|RPL21|RPS13|RPS3A|RPS17|RPS12|RPS2|RPL15|RPL26|RPS8|RPL23|RPL22|RPLP2|RPS25|RPLP0|RPL10A|RPL18|RPS23|RPL7|RPS18|RPS11|RPL31|RPS6|RPL13A|RPL6|RPL11|RPS15A|RPS4X|RPS9|RPS5|RPS16|RPL12	39	0.8625	GO_PROTEIN_LOCALIZATION_TO_ENDOPLASMIC_RETICULUM (Geneset_Overlap_Data Set 1) GO_CYTOSOLIC_PART	false	Geneset_Overlap	GO_PROTEIN_LOCALIZATION_TO_ENDOPLASMIC_RETICULUM (Geneset_Overlap_Data Set 1) GO_CYTOSOLIC_PART
RPL27|RPS3|RPS7|RPS14|RPS29|RPSA|RPL19|RPS19|RPL21|RPS13|RPS3A|RPS17|RPS12|RPS2|RPL15|RPL26|RPS8|RPL23|RPL22|RPLP2|RPS25|RPLP0|RPL10A|RPL18|RPS23|RPL7|RPS18|RPS11|RPL31|RPS6|RPL13A|RPL6|RPL11|RPS15A|RPS4X|RPS9|RPS5|RPS16|RPL12	39	0.9875	GO_PROTEIN_LOCALIZATION_TO_ENDOPLASMIC_RETICULUM (Geneset_Overlap_Data Set 1) GO_ESTABLISHMENT_OF_PROTEIN_LOCALIZATION_TO_ENDOPLASMIC_RETICULUM	false	Geneset_Overlap	GO_PROTEIN_LOCALIZATION_TO_ENDOPLASMIC_RETICULUM (Geneset_Overlap_Data Set 1) GO_ESTABLISHMENT_OF_PROTEIN_LOCALIZATION_TO_ENDOPLASMIC_RETICULUM
RPL27|RPS3|RPS7|RPS14|RPS29|RPSA|RPL19|RPS19|RPL21|RPS13|RPS3A|RPS17|RPS12|RPS2|RPL15|RPL26|RPS8|RPL23|RPL22|RPLP2|RPS25|RPLP0|RPL10A|RPL18|RPS23|RPL7|RPS18|RPS11|RPL31|RPS6|RPL13A|RPL6|RPL11|RPS15A|RPS4X|RPS9|RPS5|RPS16|RPL12	39	0.9517857142857142	GO_PROTEIN_LOCALIZATION_TO_ENDOPLASMIC_RETICULUM (Geneset_Overlap_Data Set 1) GO_PROTEIN_TARGETING_TO_MEMBRANE	false	Geneset_Overlap	GO_PROTEIN_LOCALIZATION_TO_ENDOPLASMIC_RETICULUM (Geneset_Overlap_Data Set 1) GO_PROTEIN_TARGETING_TO_MEMBRANE
RPL27|RPS3|RPS7|RPS14|RPS29|RPSA|RPL19|RPS19|RPL21|RPS13|RPS3A|RPS17|RPS12|RPS2|RPL15|RPL26|RPS8|RPL23|RPL22|RPLP2|RPS25|RPLP0|RPL10A|RPL18|RPS23|RPL7|RPS18|RPS11|RPL31|RPS6|RPL13A|RPL6|RPL11|RPS15A|RPS4X|RPS9|RPS5|RPS16|RPL12	39	0.7921875	GO_PROTEIN_LOCALIZATION_TO_ENDOPLASMIC_RETICULUM (Geneset_Overlap_Data Set 1) GO_MACROMOLECULE_CATABOLIC_PROCESS	false	Geneset_Overlap	GO_PROTEIN_LOCALIZATION_TO_ENDOPLASMIC_RETICULUM (Geneset_Overlap_Data Set 1) GO_MACROMOLECULE_CATABOLIC_PROCESS
RPL27|RPS3|RPS7|RPS14|RPS29|RPSA|RPL19|RPS19|RPL21|RPS13|RPS3A|RPS17|RPS12|RPS2|RPL15|RPL26|RPS8|RPL23|RPL22|RPLP2|RPS25|RPLP0|RPL10A|RPL18|RPS23|RPL7|RPS18|RPS11|RPL31|RPS6|RPL13A|RPL6|RPL11|RPS15A|RPS4X|RPS9|RPS5|RPS16|RPL12	39	0.807172131147541	GO_PROTEIN_LOCALIZATION_TO_ENDOPLASMIC_RETICULUM (Geneset_Overlap_Data Set 1) GO_CELLULAR_AMIDE_METABOLIC_PROCESS	false	Geneset_Overlap	GO_PROTEIN_LOCALIZATION_TO_ENDOPLASMIC_RETICULUM (Geneset_Overlap_Data Set 1) GO_CELLULAR_AMIDE_METABOLIC_PROCESS
RPL27|RPS3|RPS7|RPS14|RPS29|RPSA|RPL19|RPS19|RPL21|RPS13|RPS3A|RPS17|RPS12|RPS2|RPL15|RPL26|RPS8|RPL23|RPL22|RPLP2|RPS25|RPLP0|RPL10A|RPL18|RPS23|RPL7|RPS18|RPS11|RPL31|RPS6|RPL13A|RPL6|RPL11|RPS15A|RPS4X|RPS9|RPS5|RPS16|RPL12	39	0.9409883720930232	GO_PROTEIN_LOCALIZATION_TO_ENDOPLASMIC_RETICULUM (Geneset_Overlap_Data Set 1) GO_RNA_CATABOLIC_PROCESS	false	Geneset_Overlap	GO_PROTEIN_LOCALIZATION_TO_ENDOPLASMIC_RETICULUM (Geneset_Overlap_Data Set 1) GO_RNA_CATABOLIC_PROCESS
RPL27|RPS3|RPS7|RPS14|RPS29|RPSA|RPL19|RPS19|RPL21|RPS13|RPS3A|RPS17|RPS12|RPS2|RPL15|RPL26|RPS8|RPL23|RPL22|RPLP2|RPS25|RPLP0|RPL10A|RPL18|RPS23|RPL7|RPS18|RPS11|RPL31|RPS6|RPL13A|RPL6|RPL11|RPS15A|RPS4X|RPS9|RPS5|RPS16|RPL12	39	0.8357142857142856	GO_PROTEIN_LOCALIZATION_TO_ENDOPLASMIC_RETICULUM (Geneset_Overlap_Data Set 1) GO_RNA_PROCESSING	false	Geneset_Overlap	GO_PROTEIN_LOCALIZATION_TO_ENDOPLASMIC_RETICULUM (Geneset_Overlap_Data Set 1) GO_RNA_PROCESSING
RPL27|RPS3|RPS7|RPS14|RPS29|RPSA|RPL19|RPS19|RPL21|RPS13|RPS3A|RPS17|RPS12|RPS2|RPL15|RPL26|RPS8|RPL23|RPL22|RPLP2|RPS25|RPLP0|RPL10A|RPL18|RPS23|RPL7|RPS18|VAPA|RPS11|RPL31|RPS6|RPL13A|RPL6|RPL11|RPS15A|RPS4X|RPS9|RPS5|RPS16|RPL12	40	0.7564102564102564	GO_PROTEIN_LOCALIZATION_TO_ENDOPLASMIC_RETICULUM (Geneset_Overlap_Data Set 1) GO_ORGANONITROGEN_COMPOUND_BIOSYNTHETIC_PROCESS	false	Geneset_Overlap	GO_PROTEIN_LOCALIZATION_TO_ENDOPLASMIC_RETICULUM (Geneset_Overlap_Data Set 1) GO_ORGANONITROGEN_COMPOUND_BIOSYNTHETIC_PROCESS
RPL27|RPS3|RPS7|RPS14|RPS29|RPSA|RPL19|RPS19|RPL21|RPS13|RPS3A|RPS17|RPS12|RPS2|RPL15|RPL26|RPS8|RPL23|RPL22|RPLP2|RPS25|RPLP0|RPL10A|RPL18|RPS23|RPL7|RPS18|RPS11|RPL31|RPS6|RPL13A|RPL6|RPL11|RPS15A|RPS4X|RPS9|RPS5|RPS16|RPL12	39	0.9875	GO_PROTEIN_LOCALIZATION_TO_ENDOPLASMIC_RETICULUM (Geneset_Overlap_Data Set 1) GO_RRNA_METABOLIC_PROCESS	false	Geneset_Overlap	GO_PROTEIN_LOCALIZATION_TO_ENDOPLASMIC_RETICULUM (Geneset_Overlap_Data Set 1) GO_RRNA_METABOLIC_PROCESS
RPL27|RPS3|RPS7|RPS14|RPS29|RPSA|RPL19|RPS19|RPL21|RPS13|RPS3A|RPS17|RPS12|RPS2|RPL15|RPL26|RPS8|RPL23|RPL22|RPLP2|RPS25|RPLP0|RPL10A|RPL18|RPS23|RPL7|RPS18|RPS11|RPL31|RPS6|RPL13A|RPL6|RPL11|RPS15A|RPS4X|RPS9|RPS5|RPS16|RPL12	39	0.9409883720930232	GO_PROTEIN_LOCALIZATION_TO_ENDOPLASMIC_RETICULUM (Geneset_Overlap_Data Set 1) GO_NCRNA_METABOLIC_PROCESS	false	Geneset_Overlap	GO_PROTEIN_LOCALIZATION_TO_ENDOPLASMIC_RETICULUM (Geneset_Overlap_Data Set 1) GO_NCRNA_METABOLIC_PROCESS
RPL27|RPS3|RPS7|RPS14|RPS29|RPSA|RPL19|RPS19|RPL21|RPS13|RPS3A|RPS17|RPS12|RPS2|RPL15|RPL26|RPS8|RPL23|RPL22|RPLP2|RPS25|RPLP0|RPL10A|RPL18|RPS23|RPL7|RPS18|RPS11|RPL31|RPS6|RPL13A|RPL6|RPL11|RPS15A|RPS4X|RPS9|RPS5|RPS16|RPL12	39	0.963109756097561	GO_PROTEIN_LOCALIZATION_TO_ENDOPLASMIC_RETICULUM (Geneset_Overlap_Data Set 1) GO_MULTI_ORGANISM_METABOLIC_PROCESS	false	Geneset_Overlap	GO_PROTEIN_LOCALIZATION_TO_ENDOPLASMIC_RETICULUM (Geneset_Overlap_Data Set 1) GO_MULTI_ORGANISM_METABOLIC_PROCESS
RPL27|RPL19|RPL21|RPL15|RPL26|RPL23|RPL22|RPLP2|RPLP0|RPL10A|RPL18|RPL7|RPL31|RPL13A|RPL6|RPL11|RPL12	17	0.7125	GO_PROTEIN_LOCALIZATION_TO_ENDOPLASMIC_RETICULUM (Geneset_Overlap_Data Set 1) GO_LARGE_RIBOSOMAL_SUBUNIT	false	Geneset_Overlap	GO_PROTEIN_LOCALIZATION_TO_ENDOPLASMIC_RETICULUM (Geneset_Overlap_Data Set 1) GO_LARGE_RIBOSOMAL_SUBUNIT
RPL27|RPS3|RPS7|RPS14|RPS29|RPSA|RPL19|RPS19|RPL21|RPS13|RPS3A|RPS17|RPS12|RPS2|RPL15|RPL26|RPS8|RPL23|RPL22|RPLP2|RPS25|RPLP0|RPL10A|RPL18|RPS23|RPL7|RPS18|RPS11|RPL31|RPS6|RPL13A|RPL6|RPL11|RPS15A|RPS4X|RPS9|RPS5|RPS16|RPL12	39	0.8625	GO_PROTEIN_LOCALIZATION_TO_ENDOPLASMIC_RETICULUM (Geneset_Overlap_Data Set 1) GO_ESTABLISHMENT_OF_PROTEIN_LOCALIZATION_TO_ORGANELLE	false	Geneset_Overlap	GO_PROTEIN_LOCALIZATION_TO_ENDOPLASMIC_RETICULUM (Geneset_Overlap_Data Set 1) GO_ESTABLISHMENT_OF_PROTEIN_LOCALIZATION_TO_ORGANELLE
RPL27|RPS3|RPS7|RPS14|RPS29|RPSA|RPL19|RPS19|RPL21|RPS13|RPS3A|RPS17|RPS12|RPS2|RPL15|RPL26|RPS8|RPL23|RPL22|RPLP2|RPS25|RPLP0|RPL10A|RPL18|RPS23|RPL7|RPS18|RPS11|RPL31|RPS6|RPL13A|RPL6|RPL11|RPS15A|RPS4X|RPS9|RPS5|RPS16|RPL12	39	0.9306818181818182	GO_PROTEIN_LOCALIZATION_TO_ENDOPLASMIC_RETICULUM (Geneset_Overlap_Data Set 1) GO_RIBOSOME	false	Geneset_Overlap	GO_PROTEIN_LOCALIZATION_TO_ENDOPLASMIC_RETICULUM (Geneset_Overlap_Data Set 1) GO_RIBOSOME
RPL27|RPS3|RPS7|RPS14|RPS29|RPSA|RPL19|RPS19|RPL21|RPS13|RPS3A|RPS17|RPS12|RPS2|RPL15|RPL26|RPS8|RPL23|RPL22|RPLP2|RPS25|RPLP0|RPL10A|RPL18|RPS23|RPL7|RPS18|RPS11|RPL31|RPS6|RPL13A|RPL6|RPL11|RPS15A|RPS4X|RPS9|RPS5|RPS16|RPL12	39	0.6435	GO_PROTEIN_LOCALIZATION_TO_ENDOPLASMIC_RETICULUM (Geneset_Overlap_Data Set 1) GO_CATABOLIC_PROCESS	false	Geneset_Overlap	GO_PROTEIN_LOCALIZATION_TO_ENDOPLASMIC_RETICULUM (Geneset_Overlap_Data Set 1) GO_CATABOLIC_PROCESS
RPL27|RPS3|RPS7|RPS14|RPS29|RPSA|RPL19|RPS19|RPL21|RPS13|RPS3A|RPS17|RPS12|RPS2|RPL15|RPL26|RPS8|RPL23|RPL22|RPLP2|RPS25|RPLP0|RPL10A|RPL18|RPS23|RPL7|RPS18|RPS11|RPL31|RPS6|RPL13A|RPL6|RPL11|RPS15A|RPS4X|RPS9|RPS5|RPS16|RPL12	39	0.963109756097561	GO_PROTEIN_LOCALIZATION_TO_ENDOPLASMIC_RETICULUM (Geneset_Overlap_Data Set 1) GO_RIBOSOMAL_SUBUNIT	false	Geneset_Overlap	GO_PROTEIN_LOCALIZATION_TO_ENDOPLASMIC_RETICULUM (Geneset_Overlap_Data Set 1) GO_RIBOSOMAL_SUBUNIT
RPL27|RPS3|RPS7|RPS14|RPS29|RPSA|RPL19|RPS19|RPL21|RPS13|RPS3A|RPS17|RPS12|RPS2|RPL15|RPL26|RPS8|RPL23|RPL22|RPLP2|RPS25|RPLP0|RPL10A|RPL18|RPS23|RPL7|RPS18|RPS11|RPL31|RPS6|RPL13A|RPL6|RPL11|RPS15A|RPS4X|RPS9|RPS5|RPS16|RPL12	39	0.8625	GO_PROTEIN_LOCALIZATION_TO_ENDOPLASMIC_RETICULUM (Geneset_Overlap_Data Set 1) GO_AMIDE_BIOSYNTHETIC_PROCESS	false	Geneset_Overlap	GO_PROTEIN_LOCALIZATION_TO_ENDOPLASMIC_RETICULUM (Geneset_Overlap_Data Set 1) GO_AMIDE_BIOSYNTHETIC_PROCESS
RPL27|RPS3|RPS7|RPS14|RPS29|RPSA|RPL19|RPS19|RPL21|RPS13|RPS3A|RPS17|RPS12|RPS2|RPL15|RPL26|RPS8|RPL23|RPL22|RPLP2|RPS25|RPLP0|RPL10A|RPL18|RPS23|RPL7|RPS18|RPS11|RPL31|RPS6|RPL13A|RPL6|RPL11|RPS15A|RPS4X|RPS9|RPS5|RPS16|RPL12	39	0.9023936170212765	GO_PROTEIN_LOCALIZATION_TO_ENDOPLASMIC_RETICULUM (Geneset_Overlap_Data Set 1) GO_RIBONUCLEOPROTEIN_COMPLEX_BIOGENESIS	false	Geneset_Overlap	GO_PROTEIN_LOCALIZATION_TO_ENDOPLASMIC_RETICULUM (Geneset_Overlap_Data Set 1) GO_RIBONUCLEOPROTEIN_COMPLEX_BIOGENESIS
RPL27|RPS3|RPS7|RPS14|RPSA|RPL19|RPS19|RPL21|RPS13|RPS3A|RPS17|RPS12|RPS2|RPL15|RPL26|RPS8|RPL23|RPL22|RPS25|RPLP0|RPL10A|RPS23|RPL7|RPS18|RPS11|RPL31|RPS6|RPL13A|RPL6|RPL11|RPS15A|RPS4X|RPS9|RPS5|RPS16|RPL12	36	0.6065217391304348	GO_PROTEIN_LOCALIZATION_TO_ENDOPLASMIC_RETICULUM (Geneset_Overlap_Data Set 1) GO_POLY_A_RNA_BINDING	false	Geneset_Overlap	GO_PROTEIN_LOCALIZATION_TO_ENDOPLASMIC_RETICULUM (Geneset_Overlap_Data Set 1) GO_POLY_A_RNA_BINDING
RPL27|RPS3|RPS7|RPS14|RPS29|RPSA|RPL19|RPS19|RPL21|RPS13|RPS3A|RPS17|RPS12|RPS2|RPL15|RPL26|RPS8|RPL23|RPL22|RPLP2|RPS25|RPLP0|RPL10A|RPL18|RPS23|RPL7|RPS18|RPS11|RPL31|RPS6|RPL13A|RPL6|RPL11|RPS15A|RPS4X|RPS9|RPS5|RPS16|RPL12	39	0.9306818181818182	GO_PROTEIN_LOCALIZATION_TO_ENDOPLASMIC_RETICULUM (Geneset_Overlap_Data Set 1) GO_RIBOSOME_BIOGENESIS	false	Geneset_Overlap	GO_PROTEIN_LOCALIZATION_TO_ENDOPLASMIC_RETICULUM (Geneset_Overlap_Data Set 1) GO_RIBOSOME_BIOGENESIS
RPS3|RPS7|RPS14|RPL19|RPS19|RPL21|RPS13|RPS3A|RPS2|RPL23|RPS25|RPL10A|RPL18|RPS23|RPL7|RPS11|RPS6|RPL13A|RPL11|RPS9|RPL12	21	0.45026525198938994	GO_PROTEIN_LOCALIZATION_TO_ENDOPLASMIC_RETICULUM (Geneset_Overlap_Data Set 1) GO_NUCLEOLUS	false	Geneset_Overlap	GO_PROTEIN_LOCALIZATION_TO_ENDOPLASMIC_RETICULUM (Geneset_Overlap_Data Set 1) GO_NUCLEOLUS
RPL27|RPS3|RPS7|RPS14|RPS29|RPSA|RPL19|RPS19|RPL21|RPS13|RPS3A|RPS17|RPS12|RPS2|RPL15|RPL26|RPS8|RPL23|RPL22|RPLP2|RPS25|RPLP0|RPL10A|RPL18|RPS23|RPL7|RPS18|RPS11|RPL31|RPS6|RPL13A|RPL6|RPL11|RPS15A|RPS4X|RPS9|RPS5|RPS16|RPL12	39	0.9517857142857142	GO_PROTEIN_LOCALIZATION_TO_ENDOPLASMIC_RETICULUM (Geneset_Overlap_Data Set 1) GO_NCRNA_PROCESSING	false	Geneset_Overlap	GO_PROTEIN_LOCALIZATION_TO_ENDOPLASMIC_RETICULUM (Geneset_Overlap_Data Set 1) GO_NCRNA_PROCESSING
RPL27|RPS3|RPS7|RPS14|RPS29|RPSA|RPL19|RPS19|RPL21|RPS13|RPS3A|RPS17|RPS12|RPS2|RPL15|RPL26|RPS8|RPL23|RPL22|RPLP2|RPS25|RPLP0|RPL10A|RPL18|RPS23|RPL7|RPS18|RPS11|RPL31|RPS6|RPL13A|RPL6|RPL11|RPS15A|RPS4X|RPS9|RPS5|RPS16|RPL12	39	0.8357142857142856	GO_PROTEIN_LOCALIZATION_TO_ENDOPLASMIC_RETICULUM (Geneset_Overlap_Data Set 1) GO_PROTEIN_LOCALIZATION_TO_MEMBRANE	false	Geneset_Overlap	GO_PROTEIN_LOCALIZATION_TO_ENDOPLASMIC_RETICULUM (Geneset_Overlap_Data Set 1) GO_PROTEIN_LOCALIZATION_TO_MEMBRANE
RPL27|RPS3|RPS7|RPS14|RPS29|RPSA|RPL19|RPS19|RPL21|RPS13|RPS3A|RPS17|RPS12|RPS2|RPL15|RPL26|RPS8|RPL23|RPL22|RPLP2|RPS25|RPLP0|RPL10A|RPL18|RPS23|RPL7|RPS18|RPS11|RPL31|RPS6|RPL13A|RPL6|RPL11|RPS15A|RPS4X|RPS9|RPS5|RPS16|RPL12	39	0.963109756097561	GO_PROTEIN_LOCALIZATION_TO_ENDOPLASMIC_RETICULUM (Geneset_Overlap_Data Set 1) GO_NUCLEAR_TRANSCRIBED_MRNA_CATABOLIC_PROCESS_NONSENSE_MEDIATED_DECAY	false	Geneset_Overlap	GO_PROTEIN_LOCALIZATION_TO_ENDOPLASMIC_RETICULUM (Geneset_Overlap_Data Set 1) GO_NUCLEAR_TRANSCRIBED_MRNA_CATABOLIC_PROCESS_NONSENSE_MEDIATED_DECAY
RPL27|RPS3|RPS7|RPS14|RPS29|RPSA|RPL19|RPS19|RPL21|RPS13|RPS3A|RPS17|RPS12|RPS2|RPL15|RPL26|RPS8|RPL23|RPL22|RPLP2|RPS25|RPLP0|RPL10A|RPL18|RPS23|RPL7|RPS18|RPS11|RPL31|RPS6|RPL13A|RPL6|RPL11|RPS15A|RPS4X|RPS9|RPS5|RPS16|RPL12	39	0.7224397590361445	GO_PROTEIN_LOCALIZATION_TO_ENDOPLASMIC_RETICULUM (Geneset_Overlap_Data Set 1) GO_INTRACELLULAR_PROTEIN_TRANSPORT	false	Geneset_Overlap	GO_PROTEIN_LOCALIZATION_TO_ENDOPLASMIC_RETICULUM (Geneset_Overlap_Data Set 1) GO_INTRACELLULAR_PROTEIN_TRANSPORT
RPL27|RPS3|RPS7|RPS14|RPS29|RPSA|RPL19|RPS19|RPL21|RPS13|RPS3A|RPS17|RPS12|RPS2|RPL15|RPL26|RPS8|RPL23|RPL22|RPLP2|RPS25|RPLP0|RPL10A|RPL18|RPS23|RPL7|RPS18|RPS11|RPL31|RPS6|RPL13A|RPL6|RPL11|RPS15A|RPS4X|RPS9|RPS5|RPS16|RPL12	39	0.8357142857142856	GO_PROTEIN_LOCALIZATION_TO_ENDOPLASMIC_RETICULUM (Geneset_Overlap_Data Set 1) GO_PROTEIN_TARGETING	false	Geneset_Overlap	GO_PROTEIN_LOCALIZATION_TO_ENDOPLASMIC_RETICULUM (Geneset_Overlap_Data Set 1) GO_PROTEIN_TARGETING
RPL27|RPS3|RPS7|RPS14|RPS29|RPSA|RPL19|RPS19|RPL21|RPS13|RPS3A|RPS17|RPS12|RPS2|RPL15|RPL26|RPS8|RPL23|RPL22|RPLP2|RPS25|RPLP0|RPL10A|RPL18|RPS23|RPL7|RPS18|RPS11|RPL31|RPS6|RPL13A|RPL6|RPL11|RPS15A|RPS4X|RPS9|RPS5|RPS16|RPL12	39	0.8698529411764706	GO_PROTEIN_LOCALIZATION_TO_ENDOPLASMIC_RETICULUM (Geneset_Overlap_Data Set 1) GO_ESTABLISHMENT_OF_PROTEIN_LOCALIZATION_TO_MEMBRANE	false	Geneset_Overlap	GO_PROTEIN_LOCALIZATION_TO_ENDOPLASMIC_RETICULUM (Geneset_Overlap_Data Set 1) GO_ESTABLISHMENT_OF_PROTEIN_LOCALIZATION_TO_MEMBRANE
ITGB1|HNRNPK|MARCKS|SNCA|SNCB|CALB1|SYT1|MAPT|PPP1CC|RTN4|CANX|GPM6A|MAP1B|PFN2|ATP2B1|DCLK1|SYN1|SV2A|GAP43|SLC1A3|MYH10|RAB7A|PPP1R9B|NSF|ATP1A3|VAMP2|STXBP1	27	0.5859375	GO_CELL_PROJECTION_PART (Geneset_Overlap_Data Set 1) GO_SYNAPSE_PART	false	Geneset_Overlap	GO_CELL_PROJECTION_PART (Geneset_Overlap_Data Set 1) GO_SYNAPSE_PART
ITGB1|HNRNPK|MARCKS|GOT1|SNCA|SNCB|SYNCRIP|CLIP2|STMN2|CALB1|DBN1|DPYSL3|CTNNB1|SYT1|MAPT|PPP1CC|L1CAM|RTN4|CANX|UCHL1|GPM6A|MAP1B|HSP90AA1|SOD1|PFN2|ATP2B1|DCLK1|SYN1|GNB1|SV2A|GAP43|SLC1A3|MYH10|RAB7A|PPP1R9B|OPA1|NSF|ATP1A3|VAMP2|STXBP1|MYO5A|ARPC2	42	0.6177732379979571	GO_CELL_PROJECTION_PART (Geneset_Overlap_Data Set 1) GO_NEURON_PART	false	Geneset_Overlap	GO_CELL_PROJECTION_PART (Geneset_Overlap_Data Set 1) GO_NEURON_PART
ITGB1|HNRNPK|MARCKS|GOT1|SNCA|SNCB|SYNCRIP|CLIP2|STMN2|CALB1|DBN1|DPYSL3|CTNNB1|SYT1|MAPT|PPP1CC|L1CAM|CANX|UCHL1|GPM6A|MAP1B|HSP90AA1|SOD1|PFN2|ATP2B1|SYN1|GNB1|SV2A|GAP43|SLC1A3|MYH10|RAB7A|PPP1R9B|OPA1|NSF|ATP1A3|VAMP2|STXBP1|MYO5A|ARPC2	40	0.616800920598389	GO_CELL_PROJECTION_PART (Geneset_Overlap_Data Set 1) GO_NEURON_PROJECTION	false	Geneset_Overlap	GO_CELL_PROJECTION_PART (Geneset_Overlap_Data Set 1) GO_NEURON_PROJECTION
ITGB1|HNRNPK|MARCKS|SNCA|SNCB|CALB1|CTNNB1|SYT1|MAPT|PPP1CC|RTN4|CANX|GPM6A|MAP1B|PFN2|ATP2B1|DCLK1|SYN1|SV2A|GAP43|SLC1A3|MYH10|RAB7A|PPP1R9B|NSF|ATP1A3|VAMP2|STXBP1|ARPC2	29	0.5366883116883117	GO_CELL_PROJECTION_PART (Geneset_Overlap_Data Set 1) GO_SYNAPSE	false	Geneset_Overlap	GO_CELL_PROJECTION_PART (Geneset_Overlap_Data Set 1) GO_SYNAPSE
RPLP2|RPLP0|RPS17|RPL26|RPL19|RPS13|RPL21|RPL12|RPS15A|RPS23|RPS25|RPS12|RPS3A|RPL27|RPS16|RPL11|RPL6|RPL13A|RPL18|RPL23|RPS7|RPS3|RPS29|RPS9|RPL10A|RPS18|RPL7|RPL22|RPS2|RPL15|RPS8|RPS19|RPSA|RPS14|RPS5|RPS4X|RPS11|RPL31|RPS6	39	0.8420454545454545	GO_VIRAL_LIFE_CYCLE (Geneset_Overlap_Data Set 1) GO_NUCLEAR_TRANSCRIBED_MRNA_CATABOLIC_PROCESS_NONSENSE_MEDIATED_DECAY	false	Geneset_Overlap	GO_VIRAL_LIFE_CYCLE (Geneset_Overlap_Data Set 1) GO_NUCLEAR_TRANSCRIBED_MRNA_CATABOLIC_PROCESS_NONSENSE_MEDIATED_DECAY
RPLP2|RPLP0|RPS17|RPL26|RPL19|RPS13|RPL21|RPL12|VCP|RPS15A|RPS23|RPS25|RPS12|RPS3A|RPL27|RPS16|RPL11|RPL6|RPL13A|RPL18|KPNB1|RPL23|RPS7|RPS3|RPS29|RPS9|RPL10A|RPS18|RPL7|APOE|RPL22|RPS2|RPL15|RPS8|RPS19|RPSA|RPS14|RPS5|RPS4X|RPS11|RPL31|RPS6	42	0.7875	GO_VIRAL_LIFE_CYCLE (Geneset_Overlap_Data Set 1) GO_ORGANIC_CYCLIC_COMPOUND_CATABOLIC_PROCESS	false	Geneset_Overlap	GO_VIRAL_LIFE_CYCLE (Geneset_Overlap_Data Set 1) GO_ORGANIC_CYCLIC_COMPOUND_CATABOLIC_PROCESS
RPLP2|RPLP0|RPS17|RPL26|RPL19|RPS13|RPL21|RPL12|RPS15A|RPS23|RPS25|RPS12|RPS3A|RPL27|RPS16|RPL11|RPL6|RPL13A|RPL18|RPL23|RPS7|RPS3|RPS29|RPS9|RPL10A|RPS18|RPL7|RPL22|EIF3A|RPS2|RPL15|RPS8|RPS19|RPSA|RPS14|RPS5|XPO1|RPS4X|RPS11|RPL31|RPS6	41	0.6266175814368585	GO_VIRAL_LIFE_CYCLE (Geneset_Overlap_Data Set 1) GO_RIBONUCLEOPROTEIN_COMPLEX	false	Geneset_Overlap	GO_VIRAL_LIFE_CYCLE (Geneset_Overlap_Data Set 1) GO_RIBONUCLEOPROTEIN_COMPLEX
RPLP2|RPLP0|RPS17|RPL26|RPL19|RPS13|RPL21|RPL12|VCP|RPS15A|RPS23|RPS25|RPS12|RPS3A|RPL27|RPS16|RPL11|RAB7A|RPL6|RPL13A|RPL18|KPNB1|RPL23|CTSB|RPS7|RPS3|RPS29|RPS9|RPL10A|RPS18|RPL7|APOE|RPL22|RPS2|RPL15|RPS8|RPS19|RPSA|RPS14|RPS5|RPS4X|RPS11|RPL31|RPS6	44	0.5715865118850193	GO_VIRAL_LIFE_CYCLE (Geneset_Overlap_Data Set 1) GO_CATABOLIC_PROCESS	false	Geneset_Overlap	GO_VIRAL_LIFE_CYCLE (Geneset_Overlap_Data Set 1) GO_CATABOLIC_PROCESS
RPLP2|RPLP0|RPS17|RPL26|RPL19|RPS13|RPL21|RPL12|RPS15A|RPS23|RPS25|RPS12|RPS3A|RPL27|RPS16|RPL11|RPL6|RPL13A|RPL18|RPL23|RPS7|RPS3|RPS29|RPS9|RPL10A|RPS18|RPL7|RPL22|EIF3A|RPS2|RPL15|RPS8|RPS19|RPSA|RPS14|RPS5|RPS4X|RPS11|RPL31|RPS6	40	0.6998491704374057	GO_VIRAL_LIFE_CYCLE (Geneset_Overlap_Data Set 1) GO_AMIDE_BIOSYNTHETIC_PROCESS	false	Geneset_Overlap	GO_VIRAL_LIFE_CYCLE (Geneset_Overlap_Data Set 1) GO_AMIDE_BIOSYNTHETIC_PROCESS
RPLP2|RPLP0|RPS17|RPL26|RPL19|RPS13|RPL21|RPL12|RPS15A|RPS23|RPS25|RPS12|RPS3A|RPL27|RPS16|RPL11|RPL6|RPL13A|RPL18|RPL23|RPS7|RPS3|RPS29|RPS9|RPL10A|RPS18|RPL7|RPL22|RPS2|RPL15|RPS8|RPS19|RPSA|RPS14|RPS5|RPS4X|RPS11|RPL31|RPS6	39	0.8420454545454545	GO_VIRAL_LIFE_CYCLE (Geneset_Overlap_Data Set 1) GO_RIBOSOMAL_SUBUNIT	false	Geneset_Overlap	GO_VIRAL_LIFE_CYCLE (Geneset_Overlap_Data Set 1) GO_RIBOSOMAL_SUBUNIT
RPLP2|RPLP0|RPS17|RPL26|RPL19|RPS13|RPL21|RPL12|RPS15A|RPS23|RPS25|RPS12|RPS3A|RPL27|RPS16|RPL11|RPL6|RPL13A|RPL18|RPL23|RPS7|RPS3|RPS29|RPS9|RPL10A|RPS18|RPL7|RPL22|RPS2|RPL15|RPS8|RPS19|RPSA|RPS14|RPS5|RPS4X|RPS11|RPL31|RPS6	39	0.8063909774436091	GO_VIRAL_LIFE_CYCLE (Geneset_Overlap_Data Set 1) GO_NCRNA_METABOLIC_PROCESS	false	Geneset_Overlap	GO_VIRAL_LIFE_CYCLE (Geneset_Overlap_Data Set 1) GO_NCRNA_METABOLIC_PROCESS
RPLP2|RPLP0|RPS17|RPL26|RPL19|RPS13|RPL21|RPL12|RPS15A|RPS23|RPS25|RPS12|RPS3A|RPL27|RPS16|RPL11|RPL6|RPL13A|RPL18|RPL23|RPS7|RPS3|RPS29|RPS9|RPL10A|RPS18|RPL7|RPL22|RPS2|RPL15|RPS8|RPS19|RPSA|RPS14|RPS5|RPS4X|RPS11|RPL31|RPS6	39	0.677807486631016	GO_VIRAL_LIFE_CYCLE (Geneset_Overlap_Data Set 1) GO_CYTOSOLIC_PART	false	Geneset_Overlap	GO_VIRAL_LIFE_CYCLE (Geneset_Overlap_Data Set 1) GO_CYTOSOLIC_PART
RPLP2|RPLP0|RPS17|RPL26|RAN|RPL19|RPS13|RPL21|RPL12|VCP|RPS15A|DYNLT1|RPS23|RPS25|RPS12|RPS3A|RPL27|RPS16|RPL11|RAB7A|RPL6|RPL13A|RPL18|KPNB1|RPL23|SCARB2|RPS7|RPS3|RPS29|RPS9|RPL10A|RPS18|RPL7|ITGB1|RPL22|RPS2|RPL15|RPS8|RPS19|RPSA|RPS14|RPS5|XPO1|RPS4X|RPS11|RPL31|RPS6	47	0.6992301290054099	GO_VIRAL_LIFE_CYCLE (Geneset_Overlap_Data Set 1) GO_INTRACELLULAR_PROTEIN_TRANSPORT	false	Geneset_Overlap	GO_VIRAL_LIFE_CYCLE (Geneset_Overlap_Data Set 1) GO_INTRACELLULAR_PROTEIN_TRANSPORT
RPLP2|RPLP0|RPS17|RPL26|RPL19|RPS13|RPL21|RPL12|RPS15A|RPS23|RPS12|RPS3A|RPL27|RPS16|RPL11|RPL6|RPL13A|RPL18|RPL23|RPS7|RPS3|RPS29|RPS9|RPL10A|RPS18|RPL7|RPL22|RPS2|RPL15|RPS8|RPS19|RPSA|RPS14|RPS5|RPS4X|RPS11|RPL31|RPS6	38	0.7967479674796748	GO_VIRAL_LIFE_CYCLE (Geneset_Overlap_Data Set 1) GO_STRUCTURAL_CONSTITUENT_OF_RIBOSOME	false	Geneset_Overlap	GO_VIRAL_LIFE_CYCLE (Geneset_Overlap_Data Set 1) GO_STRUCTURAL_CONSTITUENT_OF_RIBOSOME
RPLP2|RPLP0|RPS17|RPL26|RPL19|RPS13|RPL21|RPL12|RPS15A|RPS23|RPS25|RPS12|RPS3A|RPL27|RPS16|RPL11|RPL6|RPL13A|RPL18|RPL23|RPS7|RPS3|RPS29|RPS9|RPL10A|RPS18|RPL7|RPL22|RPS2|RPL15|RPS8|RPS19|RPSA|RPS14|RPS5|RPS4X|RPS11|RPL31|RPS6	39	0.8063909774436091	GO_VIRAL_LIFE_CYCLE (Geneset_Overlap_Data Set 1) GO_RNA_CATABOLIC_PROCESS	false	Geneset_Overlap	GO_VIRAL_LIFE_CYCLE (Geneset_Overlap_Data Set 1) GO_RNA_CATABOLIC_PROCESS
RPLP2|RPLP0|RPS17|RPL26|RAN|RPL19|RPS13|RPL21|RPL12|RPS15A|RPS23|RPS25|RPS12|RPS3A|RPL27|RPS16|RPL11|RPL6|RPL13A|RPL18|RPL23|RPS7|RPS3|RPS29|RPS9|RPL10A|RPS18|RPL7|RPL22|EIF3A|RPS2|RPL15|RPS8|RPS19|RPSA|RPS14|RPS5|XPO1|RPS4X|RPS11|RPL31|RPS6	42	0.8185907046476761	GO_VIRAL_LIFE_CYCLE (Geneset_Overlap_Data Set 1) GO_RIBONUCLEOPROTEIN_COMPLEX_BIOGENESIS	false	Geneset_Overlap	GO_VIRAL_LIFE_CYCLE (Geneset_Overlap_Data Set 1) GO_RIBONUCLEOPROTEIN_COMPLEX_BIOGENESIS
RPLP2|RPLP0|RPS17|RPL26|RAN|RPL19|RPS13|RPL21|PPIA|HSP90AB1|RPL12|VCP|RPS15A|RPS23|RPS25|RPS12|RPS3A|RPL27|RPS16|RPL11|RPL6|RPL13A|RPL18|KPNB1|RPL23|RPS7|RPS3|RPS9|RPL10A|RPS18|RPL7|RPL22|EIF3A|RPS2|RPL15|RPS8|RPS19|RPSA|RPS14|RPS5|XPO1|RPS4X|RPS11|RPL31|RPS6	45	0.5924479166666667	GO_VIRAL_LIFE_CYCLE (Geneset_Overlap_Data Set 1) GO_RNA_BINDING	false	Geneset_Overlap	GO_VIRAL_LIFE_CYCLE (Geneset_Overlap_Data Set 1) GO_RNA_BINDING
RPLP0|RPS17|RPL26|RAN|RPL19|RPS13|RPL21|PPIA|HSP90AB1|RPL12|VCP|RPS15A|RPS23|RPS25|RPS12|RPS3A|RPL27|RPS16|RPL11|RPL6|RPL13A|KPNB1|RPL23|RPS7|RPS3|RPS9|RPL10A|RPS18|RPL7|RPL22|EIF3A|RPS2|RPL15|RPS8|RPS19|RPSA|RPS14|RPS5|RPS4X|RPS11|RPL31|RPS6	42	0.559620596205962	GO_VIRAL_LIFE_CYCLE (Geneset_Overlap_Data Set 1) GO_POLY_A_RNA_BINDING	false	Geneset_Overlap	GO_VIRAL_LIFE_CYCLE (Geneset_Overlap_Data Set 1) GO_POLY_A_RNA_BINDING
RPLP2|RPLP0|RPS17|RPL26|RPL19|RPS13|RPL21|RPL12|RPS15A|RPS23|RPS12|RPS3A|RPL27|RPS16|RPL11|RPL6|RPL13A|RPL18|RPL23|RPS7|RPS3|RPS29|RPS9|RPL10A|RPS18|RPL7|RPL22|EIF3A|RPS2|RPL15|RPS8|RPS19|RPSA|RPS14|RPS5|RPS4X|RPS11|RPL31|RPS6	39	0.6357589984350548	GO_VIRAL_LIFE_CYCLE (Geneset_Overlap_Data Set 1) GO_STRUCTURAL_MOLECULE_ACTIVITY	false	Geneset_Overlap	GO_VIRAL_LIFE_CYCLE (Geneset_Overlap_Data Set 1) GO_STRUCTURAL_MOLECULE_ACTIVITY
RPLP2|RPLP0|RPS17|RPL26|RPL19|RPS13|RPL21|RPL12|RPS15A|RPS23|RPS25|RPS12|RPS3A|RPL27|RPS16|RPL11|RPL6|RPL13A|RPL18|RPL23|RPS7|RPS3|RPS29|RPS9|RPL10A|RPS18|RPL7|RPL22|RPS2|RPL15|RPS8|RPS19|RPSA|RPS14|RPS5|RPS4X|RPS11|RPL31|RPS6	39	0.8420454545454545	GO_VIRAL_LIFE_CYCLE (Geneset_Overlap_Data Set 1) GO_PROTEIN_LOCALIZATION_TO_ENDOPLASMIC_RETICULUM	false	Geneset_Overlap	GO_VIRAL_LIFE_CYCLE (Geneset_Overlap_Data Set 1) GO_PROTEIN_LOCALIZATION_TO_ENDOPLASMIC_RETICULUM
RAN|RPL19|RPS13|RPL21|RPL12|RPS23|RPS25|RPS3A|RPL11|RPL13A|RPL18|RPL23|CTSB|RPS7|RPS3|RPS9|RPL10A|RPL7|EIF3A|RPS2|RPS19|RPS14|XPO1|RPS11|RPS6	25	0.5043363499245852	GO_VIRAL_LIFE_CYCLE (Geneset_Overlap_Data Set 1) GO_NUCLEOLUS	false	Geneset_Overlap	GO_VIRAL_LIFE_CYCLE (Geneset_Overlap_Data Set 1) GO_NUCLEOLUS
RPLP2|RPLP0|RPS17|RPL26|RPL19|RPS13|RPL21|RPL12|RPS15A|RPS23|RPS25|RPS12|RPS3A|RPL27|RPS16|RPL11|RPL6|RPL13A|RPL18|RPL23|RPS7|RPS3|RPS29|RPS9|RPL10A|RPS18|RPL7|RPL22|EIF3A|RPS2|RPL15|RPS8|RPS19|RPSA|RPS14|RPS5|RPS4X|RPS11|RPL31|RPS6	40	0.656084656084656	GO_VIRAL_LIFE_CYCLE (Geneset_Overlap_Data Set 1) GO_PEPTIDE_METABOLIC_PROCESS	false	Geneset_Overlap	GO_VIRAL_LIFE_CYCLE (Geneset_Overlap_Data Set 1) GO_PEPTIDE_METABOLIC_PROCESS
RPLP2|RPLP0|RPS17|RPL26|RPL19|RPS13|RPL21|RPL12|RPS15A|RPS23|RPS25|RPS12|RPS3A|RPL27|RPS16|RPL11|RPL6|RPL13A|RPL18|PC|RPL23|RPS7|RPS3|RPS29|RPS9|RPL10A|RPS18|RPL7|RPL22|EIF3A|RPS2|RPL15|RPS8|RPS19|RPSA|RPS14|RPS5|RPS4X|RPS11|RPL31|RPS6	41	0.6604515474378488	GO_VIRAL_LIFE_CYCLE (Geneset_Overlap_Data Set 1) GO_CELLULAR_AMIDE_METABOLIC_PROCESS	false	Geneset_Overlap	GO_VIRAL_LIFE_CYCLE (Geneset_Overlap_Data Set 1) GO_CELLULAR_AMIDE_METABOLIC_PROCESS
RPLP2|RPLP0|RPS17|RPL26|RPL19|RPS13|RPL21|RPL12|RPS15A|RPS23|RPS25|RPS12|RPS3A|RPL27|RPS16|RPL11|RPL6|RPL13A|RPL18|RPL23|RPS7|RPS3|RPS29|RPS9|RPL10A|RPS18|RPL7|RPL22|RPS2|RPL15|RPS8|RPS19|RPSA|RPS14|RPS5|RPS4X|RPS11|RPL31|RPS6	39	0.8238240418118467	GO_VIRAL_LIFE_CYCLE (Geneset_Overlap_Data Set 1) GO_PROTEIN_TARGETING_TO_MEMBRANE	false	Geneset_Overlap	GO_VIRAL_LIFE_CYCLE (Geneset_Overlap_Data Set 1) GO_PROTEIN_TARGETING_TO_MEMBRANE
RPLP2|RPLP0|RPS17|RPL26|RPL19|RPS13|RPL21|RPL12|RPS15A|RPS23|RPS25|RPS12|RPS3A|RPL27|RPS16|RPL11|RPL6|RPL13A|RPL18|RPL23|RPS7|RPS3|RPS29|RPS9|RPL10A|RPS18|RPL7|RPL22|RPS2|RPL15|RPS8|RPS19|RPSA|RPS14|RPS5|RPS4X|RPS11|RPL31|RPS6	39	0.8420454545454545	GO_VIRAL_LIFE_CYCLE (Geneset_Overlap_Data Set 1) GO_CYTOSOLIC_RIBOSOME	false	Geneset_Overlap	GO_VIRAL_LIFE_CYCLE (Geneset_Overlap_Data Set 1) GO_CYTOSOLIC_RIBOSOME
RPLP2|RPLP0|RPS17|RPL26|RPL19|RPS13|RPL21|RPL12|RPS15A|RPS23|RPS25|RPS12|RPS3A|RPL27|RPS16|RPL11|RPL6|RPL13A|RPL18|RPL23|RPS7|RPS3|RPS29|RPS9|RPL10A|RPS18|RPL7|RPL22|EIF3A|RPS2|RPL15|RPS8|RPS19|RPSA|RPS14|RPS5|RPS4X|RPS11|RPL31|RPS6	40	0.8703703703703703	GO_VIRAL_LIFE_CYCLE (Geneset_Overlap_Data Set 1) GO_MULTI_ORGANISM_METABOLIC_PROCESS	false	Geneset_Overlap	GO_VIRAL_LIFE_CYCLE (Geneset_Overlap_Data Set 1) GO_MULTI_ORGANISM_METABOLIC_PROCESS
RPLP2|RPLP0|RPS17|RPL26|RPL19|RPS13|RPL21|RPL12|RPS15A|RPS23|RPS25|RPS12|RPS3A|RPL27|RPS16|RPL11|RPL6|RPL13A|RPL18|RPL23|RPS7|RPS3|RPS29|RPS9|RPL10A|RPS18|RPL7|RPL22|EIF3A|RPS2|RPL15|RPS8|RPS19|RPSA|RPS14|RPS5|RPS4X|RPS11|RPL31|RPS6	40	0.5877616747181964	GO_VIRAL_LIFE_CYCLE (Geneset_Overlap_Data Set 1) GO_ORGANONITROGEN_COMPOUND_BIOSYNTHETIC_PROCESS	false	Geneset_Overlap	GO_VIRAL_LIFE_CYCLE (Geneset_Overlap_Data Set 1) GO_ORGANONITROGEN_COMPOUND_BIOSYNTHETIC_PROCESS
RPLP2|RPLP0|RPS17|RPL26|RAN|RPL19|RPS13|RPL21|RPL12|RPS15A|RPS23|RPS25|RPS12|RPS3A|RPL27|RPS16|RPL11|RAB7A|RPL6|RPL13A|RPL18|KPNB1|RPL23|SCARB2|RPS7|RPS3|RPS29|RPS9|RPL10A|RPS18|RPL7|RPL22|RPS2|RPL15|RPS8|RPS19|RPSA|RPS14|RPS5|RPS4X|RPS11|RPL31|RPS6	43	0.7239057239057238	GO_VIRAL_LIFE_CYCLE (Geneset_Overlap_Data Set 1) GO_PROTEIN_TARGETING	false	Geneset_Overlap	GO_VIRAL_LIFE_CYCLE (Geneset_Overlap_Data Set 1) GO_PROTEIN_TARGETING
RPLP2|RPLP0|RPS17|RPL26|RPL19|RPS13|RPL21|RPL12|RPS15A|RPS23|RPS25|RPS12|RPS3A|RPL27|RPS16|RPL11|RPL6|RPL13A|RPL18|RPL23|RPS7|RPS3|RPS29|RPS9|RPL10A|RPS18|RPL7|RPL22|RPS2|RPL15|RPS8|RPS19|RPSA|RPS14|RPS5|RPS4X|RPS11|RPL31|RPS6	39	0.8611111111111112	GO_VIRAL_LIFE_CYCLE (Geneset_Overlap_Data Set 1) GO_ESTABLISHMENT_OF_PROTEIN_LOCALIZATION_TO_ENDOPLASMIC_RETICULUM	false	Geneset_Overlap	GO_VIRAL_LIFE_CYCLE (Geneset_Overlap_Data Set 1) GO_ESTABLISHMENT_OF_PROTEIN_LOCALIZATION_TO_ENDOPLASMIC_RETICULUM
RPLP2|RPLP0|RPS17|RPL26|RPL19|RPS13|RPL21|RPL12|RPS15A|RPS23|RPS25|RPS12|RPS3A|RPL27|RPS16|RPL11|RPL6|RPL13A|RPL18|RPL23|RPS7|RPS3|RPS29|RPS9|RPL10A|RPS18|RPL7|RPL22|RPS2|RPL15|RPS8|RPS19|RPSA|RPS14|RPS5|RPS4X|RPS11|RPL31|RPS6	39	0.8611111111111112	GO_VIRAL_LIFE_CYCLE (Geneset_Overlap_Data Set 1) GO_RRNA_METABOLIC_PROCESS	false	Geneset_Overlap	GO_VIRAL_LIFE_CYCLE (Geneset_Overlap_Data Set 1) GO_RRNA_METABOLIC_PROCESS
RPLP2|RPLP0|RPS17|RPL26|RAN|RPL19|RPS13|RPL21|PPIA|HSP90AB1|RPL12|VCP|RPS15A|DYNLT1|RPS23|RPS25|RPS12|RPS3A|RPL27|RPS16|RPL11|RAB7A|RPL6|RPL13A|RPL18|PC|KPNB1|RPL23|SCARB2|CTSB|RPS7|RPS3|RPS29|RPS9|RPL10A|RPS18|RPL7|APOE|ITGB1|RPL22|EIF3A|RPS2|RPL15|RPS8|RPS19|RPSA|NCAM1|RPS14|RPS5|XPO1|RPS4X|RPS11|RPL31|RPS6	54	0.8253012048192772	GO_VIRAL_LIFE_CYCLE (Geneset_Overlap_Data Set 1) GO_INTERSPECIES_INTERACTION_BETWEEN_ORGANISMS	false	Geneset_Overlap	GO_VIRAL_LIFE_CYCLE (Geneset_Overlap_Data Set 1) GO_INTERSPECIES_INTERACTION_BETWEEN_ORGANISMS
RPLP2|RPLP0|RPS17|RPL26|RPL19|RPS13|RPL21|RPL12|RPS15A|RPS23|RPS25|RPS12|RPS3A|RPL27|RPS16|RPL11|RPL6|RPL13A|RPL18|RPL23|RPS7|RPS3|RPS29|RPS9|RPL10A|RPS18|RPL7|RPL22|RPS2|RPL15|RPS8|RPS19|RPSA|RPS14|RPS5|RPS4X|RPS11|RPL31|RPS6	39	0.6396825396825396	GO_VIRAL_LIFE_CYCLE (Geneset_Overlap_Data Set 1) GO_RNA_PROCESSING	false	Geneset_Overlap	GO_VIRAL_LIFE_CYCLE (Geneset_Overlap_Data Set 1) GO_RNA_PROCESSING
RPLP2|RPLP0|RPS17|RPL26|RAN|RPL19|RPS13|RPL21|RPL12|RPS15A|RPS23|RPS25|RPS12|RPS3A|RPL27|RPS16|RPL11|RAB7A|RPL6|RPL13A|RPL18|KPNB1|RPL23|SCARB2|RPS7|RPS3|RPS29|RPS9|RPL10A|RPS18|RPL7|RPL22|RPS2|RPL15|RPS8|RPS19|RPSA|RPS14|RPS5|RPS4X|RPS11|RPL31|RPS6	43	0.7683428209993675	GO_VIRAL_LIFE_CYCLE (Geneset_Overlap_Data Set 1) GO_ESTABLISHMENT_OF_PROTEIN_LOCALIZATION_TO_ORGANELLE	false	Geneset_Overlap	GO_VIRAL_LIFE_CYCLE (Geneset_Overlap_Data Set 1) GO_ESTABLISHMENT_OF_PROTEIN_LOCALIZATION_TO_ORGANELLE
RPLP2|RPLP0|RPS17|RPL26|RPL19|RPS13|RPL21|RPL12|RPS15A|RPS23|RPS25|RPS12|RPS3A|RPL27|RPS16|RPL11|RPL6|RPL13A|RPL18|RPL23|RPS7|RPS3|RPS29|RPS9|RPL10A|RPS18|RPL7|RPL22|RPS2|RPL15|RPS8|RPS19|RPSA|RPS14|RPS5|RPS4X|RPS11|RPL31|RPS6	39	0.69	GO_VIRAL_LIFE_CYCLE (Geneset_Overlap_Data Set 1) GO_ESTABLISHMENT_OF_PROTEIN_LOCALIZATION_TO_MEMBRANE	false	Geneset_Overlap	GO_VIRAL_LIFE_CYCLE (Geneset_Overlap_Data Set 1) GO_ESTABLISHMENT_OF_PROTEIN_LOCALIZATION_TO_MEMBRANE
RPLP2|RPLP0|RPL26|RPL19|RPL21|RPL12|RPL27|RPL11|RPL6|RPL13A|RPL18|RPL23|RPL10A|RPL7|RPL22|RPL15|RPL31	17	0.6574074074074074	GO_VIRAL_LIFE_CYCLE (Geneset_Overlap_Data Set 1) GO_LARGE_RIBOSOMAL_SUBUNIT	false	Geneset_Overlap	GO_VIRAL_LIFE_CYCLE (Geneset_Overlap_Data Set 1) GO_LARGE_RIBOSOMAL_SUBUNIT
RPLP2|RPLP0|RPS17|RPL26|RPL19|RPS13|RPL21|RPL12|RPS15A|RPS23|RPS25|RPS12|RPS3A|RPL27|RPS16|RPL11|RPL6|RPL13A|RPL18|RPL23|RPS7|RPS3|RPS29|RPS9|RPL10A|RPS18|RPL7|RPL22|EIF3A|RPS2|RPL15|RPS8|RPS19|RPSA|RPS14|RPS5|RPS4X|RPS11|RPL31|RPS6	40	0.8333333333333333	GO_VIRAL_LIFE_CYCLE (Geneset_Overlap_Data Set 1) GO_TRANSLATIONAL_INITIATION	false	Geneset_Overlap	GO_VIRAL_LIFE_CYCLE (Geneset_Overlap_Data Set 1) GO_TRANSLATIONAL_INITIATION
RPLP2|RPLP0|RPS17|RPL26|RPL19|RPS13|RPL21|RPL12|RPS15A|RPS23|RPS25|RPS12|RPS3A|RPL27|RPS16|RPL11|RPL6|RPL13A|RPL18|RPL23|RPS7|RPS3|RPS29|RPS9|RPL10A|RPS18|RPL7|RPL22|RPS2|RPL15|RPS8|RPS19|RPSA|RPS14|RPS5|RPS4X|RPS11|RPL31|RPS6	39	0.8238240418118467	GO_VIRAL_LIFE_CYCLE (Geneset_Overlap_Data Set 1) GO_NCRNA_PROCESSING	false	Geneset_Overlap	GO_VIRAL_LIFE_CYCLE (Geneset_Overlap_Data Set 1) GO_NCRNA_PROCESSING
RPLP2|RPLP0|RPS17|RPL26|RPL19|RPS13|RPL21|RPL12|RPS15A|RPS23|RPS25|RPS12|RPS3A|RPL27|RPS16|RPL11|RPL6|RPL13A|RPL18|RPL23|RPS7|RPS3|RPS29|RPS9|RPL10A|RPS18|RPL7|RPL22|RPS2|RPL15|RPS8|RPS19|RPSA|RPS14|RPS5|RPS4X|RPS11|RPL31|RPS6	39	0.6546892341842396	GO_VIRAL_LIFE_CYCLE (Geneset_Overlap_Data Set 1) GO_MRNA_METABOLIC_PROCESS	false	Geneset_Overlap	GO_VIRAL_LIFE_CYCLE (Geneset_Overlap_Data Set 1) GO_MRNA_METABOLIC_PROCESS
RPLP2|RPLP0|RPS17|RPL26|RPL19|RPS13|RPL21|RPL12|VCP|RPS15A|RPS23|RPS25|RPS12|RPS3A|RPL27|RPS16|RPL11|RAB7A|RPL6|RPL13A|RPL18|KPNB1|RPL23|CTSB|RPS7|RPS3|RPS29|RPS9|RPL10A|RPS18|RPL7|APOE|RPL22|RPS2|RPL15|RPS8|RPS19|RPSA|RPS14|RPS5|RPS4X|RPS11|RPL31|RPS6	44	0.6020976728941331	GO_VIRAL_LIFE_CYCLE (Geneset_Overlap_Data Set 1) GO_CELLULAR_CATABOLIC_PROCESS	false	Geneset_Overlap	GO_VIRAL_LIFE_CYCLE (Geneset_Overlap_Data Set 1) GO_CELLULAR_CATABOLIC_PROCESS
RPLP2|RPLP0|RPS17|RPL26|RPL19|RPS13|RPL21|RPL12|VCP|RPS15A|RPS23|RPS25|RPS12|RPS3A|RPL27|RPS16|RPL11|RAB7A|RPL6|RPL13A|RPL18|KPNB1|RPL23|CTSB|RPS7|RPS3|RPS29|RPS9|RPL10A|RPS18|RPL7|APOE|RPL22|RPS2|RPL15|RPS8|RPS19|RPSA|RPS14|RPS5|RPS4X|RPS11|RPL31|RPS6	44	0.7087772704211059	GO_VIRAL_LIFE_CYCLE (Geneset_Overlap_Data Set 1) GO_MACROMOLECULE_CATABOLIC_PROCESS	false	Geneset_Overlap	GO_VIRAL_LIFE_CYCLE (Geneset_Overlap_Data Set 1) GO_MACROMOLECULE_CATABOLIC_PROCESS
RPLP2|RPLP0|RPS17|RPL26|RPL19|RPS13|RPL21|RPL12|RPS15A|RPS23|RPS25|RPS12|RPS3A|RPL27|RPS16|RPL11|RPL6|RPL13A|RPL18|RPL23|RPS7|RPS3|RPS29|RPS9|RPL10A|RPS18|RPL7|APOE|RPL22|RPS2|RPL15|RPS8|RPS19|RPSA|RPS14|RPS5|RPS4X|RPS11|RPL31|RPS6	40	0.6602254428341385	GO_VIRAL_LIFE_CYCLE (Geneset_Overlap_Data Set 1) GO_PROTEIN_LOCALIZATION_TO_MEMBRANE	false	Geneset_Overlap	GO_VIRAL_LIFE_CYCLE (Geneset_Overlap_Data Set 1) GO_PROTEIN_LOCALIZATION_TO_MEMBRANE
RPLP2|RPLP0|RPS17|RPL26|RPL19|RPS13|RPL21|RPL12|RPS15A|RPS23|RPS25|RPS12|RPS3A|RPL27|RPS16|RPL11|RPL6|RPL13A|RPL18|RPL23|RPS7|RPS3|RPS29|RPS9|RPL10A|RPS18|RPL7|RPL22|RPS2|RPL15|RPS8|RPS19|RPSA|RPS14|RPS5|RPS4X|RPS11|RPL31|RPS6	39	0.7896952686447474	GO_VIRAL_LIFE_CYCLE (Geneset_Overlap_Data Set 1) GO_RIBOSOME	false	Geneset_Overlap	GO_VIRAL_LIFE_CYCLE (Geneset_Overlap_Data Set 1) GO_RIBOSOME
RPLP2|RPLP0|RPS17|RPL26|RAN|RPL19|RPS13|RPL21|RPL12|RPS15A|RPS23|RPS25|RPS12|RPS3A|RPL27|RPS16|RPL11|RPL6|RPL13A|RPL18|RPL23|RPS7|RPS3|RPS29|RPS9|RPL10A|RPS18|RPL7|RPL22|RPS2|RPL15|RPS8|RPS19|RPSA|RPS14|RPS5|XPO1|RPS4X|RPS11|RPL31|RPS6	41	0.8428156146179402	GO_VIRAL_LIFE_CYCLE (Geneset_Overlap_Data Set 1) GO_RIBOSOME_BIOGENESIS	false	Geneset_Overlap	GO_VIRAL_LIFE_CYCLE (Geneset_Overlap_Data Set 1) GO_RIBOSOME_BIOGENESIS
HSPA8|RPL23|RPS7|RPS5|RPS6|RPS11|RPS2|RPL15|RPSA|RPL26|RPS17|RPLP0|RPL21|RPL19|RPS16|RPL18|RPS9|RPL7|RPS18|RPL10A|RPS29|RPS3|RPS4X|RPL31|RPS8|RPL22|RPS14|RPS19|RPS15A|RPL12|RPS23|RPLP2|RPS13|RPL11|RPL6|RPL13A|RPS12|RPS25|RPL27|RPS3A	40	0.6758659532526049	GO_PROTEIN_LOCALIZATION_TO_ORGANELLE (Geneset_Overlap_Data Set 1) GO_MRNA_METABOLIC_PROCESS	false	Geneset_Overlap	GO_PROTEIN_LOCALIZATION_TO_ORGANELLE (Geneset_Overlap_Data Set 1) GO_MRNA_METABOLIC_PROCESS
RPL23|RPS7|RPS5|RPS6|RPS11|RPS2|RPL15|RPSA|RPL26|RPS17|RPLP0|RPL21|RPL19|RPS16|RPL18|RPS9|RPL7|RPS18|RPL10A|RPS29|RPS3|RPS4X|RPL31|RPS8|RPL22|RPS14|RPS19|RPS15A|RPL12|RPS23|RPLP2|RPS13|RPL11|RPL6|RPL13A|RPS12|RPS25|RPL27|RPS3A	39	0.6357589984350548	GO_PROTEIN_LOCALIZATION_TO_ORGANELLE (Geneset_Overlap_Data Set 1) GO_PEPTIDE_METABOLIC_PROCESS	false	Geneset_Overlap	GO_PROTEIN_LOCALIZATION_TO_ORGANELLE (Geneset_Overlap_Data Set 1) GO_PEPTIDE_METABOLIC_PROCESS
RPL23|RPS7|RPS5|RPS6|RPS11|RPS2|RPL15|RPSA|RPL26|RPS17|RPLP0|RPL21|RPL19|RPS16|RPL18|RPS9|RPL7|RPS18|RPL10A|RPS29|RPS3|RPS4X|RPL31|RPS8|RPL22|RPS14|RPS19|RPS15A|RPL12|RPS23|RPLP2|RPS13|RPL11|RPL6|RPL13A|RPS12|RPS25|RPL27|RPS3A	39	0.677807486631016	GO_PROTEIN_LOCALIZATION_TO_ORGANELLE (Geneset_Overlap_Data Set 1) GO_CYTOSOLIC_PART	false	Geneset_Overlap	GO_PROTEIN_LOCALIZATION_TO_ORGANELLE (Geneset_Overlap_Data Set 1) GO_CYTOSOLIC_PART
RPL23|RPS7|RPS5|RPS6|RPS11|RPS2|RPL15|RPSA|RPL26|RPS17|RPLP0|RPL21|RPL19|RPS16|RPL18|RPS9|RPL7|RPS18|RPL10A|RPS29|RPS3|RPS4X|XPO1|RPL31|RPS8|RPL22|RPS14|RPS19|RPS15A|RPL12|RPS23|RAN|RPLP2|RPS13|RPL11|RPL6|RPL13A|RPS12|RPS25|RPL27|RPS3A	41	0.8428156146179402	GO_PROTEIN_LOCALIZATION_TO_ORGANELLE (Geneset_Overlap_Data Set 1) GO_RIBOSOME_BIOGENESIS	false	Geneset_Overlap	GO_PROTEIN_LOCALIZATION_TO_ORGANELLE (Geneset_Overlap_Data Set 1) GO_RIBOSOME_BIOGENESIS
HSPA8|RPL23|RPS7|TOMM22|RPS5|PHB2|RPS6|RPS11|RPS2|RPL15|RPSA|CTNNB1|FIS1|RPL26|RPS17|RPLP0|RPL21|RPL19|RPS16|RPL18|HSPA4|HSP90AA1|RPS9|RPL7|RPS18|RPL10A|RPS29|RPS3|SCARB2|RPS4X|RPL31|RPS8|RPL22|RPS14|RPS19|RPS15A|RPL12|RPS23|RAN|RPLP2|RPS13|RPL11|RAB7A|KPNB1|RPL6|RPL13A|RPS12|RPS25|RPL27|RPS3A	50	0.886691776522285	GO_PROTEIN_LOCALIZATION_TO_ORGANELLE (Geneset_Overlap_Data Set 1) GO_PROTEIN_TARGETING	false	Geneset_Overlap	GO_PROTEIN_LOCALIZATION_TO_ORGANELLE (Geneset_Overlap_Data Set 1) GO_PROTEIN_TARGETING
HSPA8|RPL23|RPS7|RPS5|RPS6|RPS11|RPS2|RPL15|RPSA|RPL26|RPS17|RPLP0|RPL21|RPL19|RPS16|RPL18|RPS9|VAPA|RPL7|RPS18|RPL10A|RPS29|RPS3|SCARB2|RPS4X|XPO1|RPL31|RPS8|RPL22|RPS14|RPS19|RPS15A|RPL12|RPS23|RAN|RPLP2|RPS13|RPL11|RAB7A|KPNB1|RPL6|RPL13A|RPS12|RPS25|RPL27|RPS3A	46	0.6786731786731787	GO_PROTEIN_LOCALIZATION_TO_ORGANELLE (Geneset_Overlap_Data Set 1) GO_INTERSPECIES_INTERACTION_BETWEEN_ORGANISMS	false	Geneset_Overlap	GO_PROTEIN_LOCALIZATION_TO_ORGANELLE (Geneset_Overlap_Data Set 1) GO_INTERSPECIES_INTERACTION_BETWEEN_ORGANISMS
HSPA8|RPL23|RPS7|RPS5|RPS6|RPS11|RPS2|RPL15|RPSA|RPL26|RPS17|RPLP0|RPL21|RPL19|RPS16|RPL18|RPS9|RPL7|RPS18|RPL10A|RPS29|RPS3|RPS4X|XPO1|RPL31|RPS8|RPL22|RPS14|RPS19|RPS15A|RPL12|RPS23|RPLP2|RPS13|RPL11|RPL6|RPL13A|RPS12|RPS25|RPL27|RPS3A	41	0.6266175814368585	GO_PROTEIN_LOCALIZATION_TO_ORGANELLE (Geneset_Overlap_Data Set 1) GO_RIBONUCLEOPROTEIN_COMPLEX	false	Geneset_Overlap	GO_PROTEIN_LOCALIZATION_TO_ORGANELLE (Geneset_Overlap_Data Set 1) GO_RIBONUCLEOPROTEIN_COMPLEX
RPL23|RPS7|RPS5|RPS6|RPS11|RPS2|RPL15|RPSA|CTNNB1|RPL26|RPS17|RPLP0|RPL21|RPL19|RPS16|RPL18|RPS9|RPL7|RPS18|RPL10A|RPS29|RPS3|RPS4X|RPL31|RPS8|RPL22|RPS14|RPS19|RPS15A|RPL12|RPS23|RPLP2|RPS13|RPL11|RAB7A|KPNB1|RPL6|RPL13A|RPS12|RPS25|RPL27|RPS3A	42	0.5714975845410628	GO_PROTEIN_LOCALIZATION_TO_ORGANELLE (Geneset_Overlap_Data Set 1) GO_CELLULAR_CATABOLIC_PROCESS	false	Geneset_Overlap	GO_PROTEIN_LOCALIZATION_TO_ORGANELLE (Geneset_Overlap_Data Set 1) GO_CELLULAR_CATABOLIC_PROCESS
RPL23|RPS7|RPS5|RPS6|RPS11|RPS2|RPL15|RPSA|RPL26|RPS17|RPLP0|RPL21|RPL19|RPS16|RPL18|RPS9|RPL7|RPS18|RPL10A|RPS29|RPS3|RPS4X|RPL31|RPS8|RPL22|RPS14|RPS19|RPS15A|RPL12|RPS23|RPLP2|RPS13|RPL11|RPL6|RPL13A|RPS12|RPS25|RPL27|RPS3A	39	0.8238240418118467	GO_PROTEIN_LOCALIZATION_TO_ORGANELLE (Geneset_Overlap_Data Set 1) GO_NCRNA_PROCESSING	false	Geneset_Overlap	GO_PROTEIN_LOCALIZATION_TO_ORGANELLE (Geneset_Overlap_Data Set 1) GO_NCRNA_PROCESSING
HSPA8|RPL23|RPS7|RPS5|RPS6|RPS11|RPS2|RPL15|RPSA|RPL26|RPS17|RPLP0|RPL21|RPL19|RPS16|RPL18|HSP90AA1|RPS9|RPL7|MAPRE1|RPS18|RPL10A|RPS3|RPS4X|XPO1|RPL31|RPS8|RPL22|RPS14|RPS19|RPS15A|RPL12|RPS23|RAN|RPLP2|RPS13|RPL11|KPNB1|RPL6|RPL13A|RPS12|RPS25|RPL27|RPS3A	44	0.5779500430663221	GO_PROTEIN_LOCALIZATION_TO_ORGANELLE (Geneset_Overlap_Data Set 1) GO_RNA_BINDING	false	Geneset_Overlap	GO_PROTEIN_LOCALIZATION_TO_ORGANELLE (Geneset_Overlap_Data Set 1) GO_RNA_BINDING
HSPA8|RPL23|RPS7|RPS5|RPS6|RPS11|RPS2|RPL15|RPSA|RPL26|RPS17|RPLP0|RPL21|RPL19|RPS16|HSP90AA1|RPS9|RPL7|MAPRE1|RPS18|RPL10A|RPS3|RPS4X|RPL31|RPS8|RPL22|RPS14|RPS19|RPS15A|RPL12|RPS23|RAN|RPS13|RPL11|KPNB1|RPL6|RPL13A|RPS12|RPS25|RPL27|RPS3A	41	0.5449522102747909	GO_PROTEIN_LOCALIZATION_TO_ORGANELLE (Geneset_Overlap_Data Set 1) GO_POLY_A_RNA_BINDING	false	Geneset_Overlap	GO_PROTEIN_LOCALIZATION_TO_ORGANELLE (Geneset_Overlap_Data Set 1) GO_POLY_A_RNA_BINDING
HSPA8|RPL23|RPS7|TOMM22|RPS5|PHB2|RPS6|RPS11|RPS2|RPL15|RPSA|CTNNB1|FIS1|RPL26|RPS17|RPLP0|RPL21|RPL19|RPS16|RPL18|HSPA4|HSP90AA1|RPS9|RPL7|RPS18|RPL10A|RPS29|RPS3|SCARB2|RPS4X|XPO1|RPL31|RPS8|RPL22|RPS14|RPS19|RPS15A|RPL12|RPS23|RAN|RPLP2|RPS13|RPL11|RAB7A|KPNB1|RPL6|RPL13A|RPS12|RPS25|RPL27|RPS3A	51	0.7722222222222221	GO_PROTEIN_LOCALIZATION_TO_ORGANELLE (Geneset_Overlap_Data Set 1) GO_INTRACELLULAR_PROTEIN_TRANSPORT	false	Geneset_Overlap	GO_PROTEIN_LOCALIZATION_TO_ORGANELLE (Geneset_Overlap_Data Set 1) GO_INTRACELLULAR_PROTEIN_TRANSPORT
RPL23|RPS7|RPS5|RPS6|RPS11|RPS2|RPL15|RPSA|RPL26|RPS17|RPLP0|RPL21|RPL19|RPS16|RPL18|RPS9|RPL7|RPS18|RPL10A|RPS29|RPS3|RPS4X|RPL31|RPS8|RPL22|RPS14|RPS19|RPS15A|RPL12|RPS23|RPLP2|RPS13|RPL11|RPL6|RPL13A|RPS12|RPS25|RPL27|RPS3A	39	0.7896952686447474	GO_RIBOSOME (Geneset_Overlap_Data Set 1) GO_PROTEIN_LOCALIZATION_TO_ORGANELLE	false	Geneset_Overlap	GO_RIBOSOME (Geneset_Overlap_Data Set 1) GO_PROTEIN_LOCALIZATION_TO_ORGANELLE
RPL23|RPS7|RPS5|RPS6|RPS11|RPS2|RPL15|RPSA|RPL26|RPS17|RPLP0|RPL21|RPL19|RPS16|RPL18|RPS9|VAPA|RPL7|RPS18|RPL10A|RPS29|RPS3|RPS4X|RPL31|RPS8|RPL22|RPS14|RPS19|RPS15A|RPL12|RPS23|RPLP2|RPS13|RPL11|RPL6|RPL13A|RPS12|RPS25|RPL27|RPS3A	40	0.8703703703703703	GO_PROTEIN_LOCALIZATION_TO_ORGANELLE (Geneset_Overlap_Data Set 1) GO_PROTEIN_LOCALIZATION_TO_ENDOPLASMIC_RETICULUM	false	Geneset_Overlap	GO_PROTEIN_LOCALIZATION_TO_ORGANELLE (Geneset_Overlap_Data Set 1) GO_PROTEIN_LOCALIZATION_TO_ENDOPLASMIC_RETICULUM
RPL23|RPS7|RPS5|RPS6|RPS11|RPS2|RPL15|RPSA|RPL26|RPS17|RPLP0|RPL21|RPL19|RPS16|RPL18|RPS9|RPL7|RPS18|RPL10A|RPS29|RPS3|RPS4X|RPL31|RPS8|RPL22|RPS14|RPS19|RPS15A|RPL12|RPS23|RPLP2|RPS13|RPL11|RPL6|RPL13A|RPS12|RPS25|RPL27|RPS3A	39	0.8611111111111112	GO_PROTEIN_LOCALIZATION_TO_ORGANELLE (Geneset_Overlap_Data Set 1) GO_RRNA_METABOLIC_PROCESS	false	Geneset_Overlap	GO_PROTEIN_LOCALIZATION_TO_ORGANELLE (Geneset_Overlap_Data Set 1) GO_RRNA_METABOLIC_PROCESS
RPL23|RPS7|RPS5|RPS6|RPS11|RPS2|RPL15|RPSA|RPL26|RPS17|RPLP0|RPL21|RPL19|RPS16|RPL18|RPS9|RPL7|RPS18|RPL10A|RPS29|RPS3|RPS4X|RPL31|RPS8|RPL22|RPS14|RPS19|RPS15A|RPL12|RPS23|RPLP2|RPS13|RPL11|RPL6|RPL13A|RPS12|RPL27|RPS3A	38	0.6157407407407407	GO_PROTEIN_LOCALIZATION_TO_ORGANELLE (Geneset_Overlap_Data Set 1) GO_STRUCTURAL_MOLECULE_ACTIVITY	false	Geneset_Overlap	GO_PROTEIN_LOCALIZATION_TO_ORGANELLE (Geneset_Overlap_Data Set 1) GO_STRUCTURAL_MOLECULE_ACTIVITY
RPL23|RPS7|RPS5|RPS6|RPS11|RPS2|RPL15|RPSA|RPL26|RPS17|RPLP0|RPL21|RPL19|RPS16|RPL18|RPS9|RPL7|RPS18|RPL10A|RPS29|RPS3|RPS4X|RPL31|RPS8|RPL22|RPS14|RPS19|RPS15A|RPL12|RPS23|RPLP2|RPS13|RPL11|RPL6|RPL13A|RPS12|RPS25|RPL27|RPS3A	39	0.8420454545454545	GO_PROTEIN_LOCALIZATION_TO_ORGANELLE (Geneset_Overlap_Data Set 1) GO_CYTOSOLIC_RIBOSOME	false	Geneset_Overlap	GO_PROTEIN_LOCALIZATION_TO_ORGANELLE (Geneset_Overlap_Data Set 1) GO_CYTOSOLIC_RIBOSOME
RPL23|RPS7|RPS5|RPS6|RPS11|RPS2|RPL15|RPSA|RPL26|RPS17|RPLP0|RPL21|RPL19|RPS16|RPL18|RPS9|RPL7|RPS18|RPL10A|RPS29|RPS3|RPS4X|RPL31|RPS8|RPL22|RPS14|RPS19|RPS15A|RPL12|RPS23|RPLP2|RPS13|RPL11|KPNB1|RPL6|RPL13A|RPS12|RPS25|RPL27|RPS3A	40	0.739247311827957	GO_PROTEIN_LOCALIZATION_TO_ORGANELLE (Geneset_Overlap_Data Set 1) GO_ORGANIC_CYCLIC_COMPOUND_CATABOLIC_PROCESS	false	Geneset_Overlap	GO_PROTEIN_LOCALIZATION_TO_ORGANELLE (Geneset_Overlap_Data Set 1) GO_ORGANIC_CYCLIC_COMPOUND_CATABOLIC_PROCESS
RPL23|RPS7|RPS5|RPS6|RPS11|RPS2|RPL15|RPSA|CTNNB1|FIS1|RPL26|RPS17|RPLP0|RPL21|RPL19|RPS16|RPL18|RPS9|RPL7|RPS18|RPL10A|RPS29|RPS3|HK1|RPS4X|RPL31|RPS8|RPL22|RPS14|RPS19|RPS15A|RPL12|RPS23|RPLP2|RPS13|RPL11|RAB7A|KPNB1|RPL6|RPL13A|RPS12|RPS25|RPL27|RPS3A	44	0.5715865118850193	GO_PROTEIN_LOCALIZATION_TO_ORGANELLE (Geneset_Overlap_Data Set 1) GO_CATABOLIC_PROCESS	false	Geneset_Overlap	GO_PROTEIN_LOCALIZATION_TO_ORGANELLE (Geneset_Overlap_Data Set 1) GO_CATABOLIC_PROCESS
HSPA8|RPL23|RPS7|TOMM22|RPS5|PHB2|RPS6|RPS11|RPS2|RPL15|RPSA|CTNNB1|FIS1|RPL26|RPS17|RPLP0|RPL21|RPL19|RPS16|RPL18|HSPA4|HSP90AA1|RPS9|RPL7|RPS18|RPL10A|RPS29|RPS3|SCARB2|HK1|RPS4X|RPL31|RPS8|RPL22|RPS14|RPS19|RPS15A|RPL12|RPS23|RAN|RPLP2|RPS13|RPL11|RAB7A|KPNB1|RPL6|RPL13A|RPS12|RPS25|RPL27|RPS3A	51	0.9722222222222222	GO_PROTEIN_LOCALIZATION_TO_ORGANELLE (Geneset_Overlap_Data Set 1) GO_ESTABLISHMENT_OF_PROTEIN_LOCALIZATION_TO_ORGANELLE	false	Geneset_Overlap	GO_PROTEIN_LOCALIZATION_TO_ORGANELLE (Geneset_Overlap_Data Set 1) GO_ESTABLISHMENT_OF_PROTEIN_LOCALIZATION_TO_ORGANELLE
RPL23|RPS7|RPS5|RPS6|RPS11|RPS2|RPL15|RPSA|RPL26|RPS17|RPLP0|RPL21|RPL19|RPS16|RPL18|RPS9|RPL7|RPS18|RPL10A|RPS29|RPS3|RPS4X|RPL31|RPS8|RPL22|RPS14|RPS19|RPS15A|RPL12|RPS23|RPLP2|RPS13|RPL11|RPL6|RPL13A|RPS12|RPS25|RPL27|RPS3A	39	0.8063909774436091	GO_PROTEIN_LOCALIZATION_TO_ORGANELLE (Geneset_Overlap_Data Set 1) GO_TRANSLATIONAL_INITIATION	false	Geneset_Overlap	GO_PROTEIN_LOCALIZATION_TO_ORGANELLE (Geneset_Overlap_Data Set 1) GO_TRANSLATIONAL_INITIATION
RPL23|RPS7|RPS5|RPS6|RPS11|RPS2|RPL15|RPSA|RPL26|RPS17|RPLP0|RPL21|RPL19|RPS16|RPL18|RPS9|RPL7|RPS18|RPL10A|RPS29|RPS3|SCARB2|RPS4X|XPO1|RPL31|RPS8|RPL22|RPS14|RPS19|RPS15A|RPL12|RPS23|RAN|RPLP2|RPS13|RPL11|RAB7A|KPNB1|RPL6|RPL13A|RPS12|RPS25|RPL27|RPS3A	44	0.7511574074074074	GO_VIRAL_LIFE_CYCLE (Geneset_Overlap_Data Set 1) GO_PROTEIN_LOCALIZATION_TO_ORGANELLE	false	Geneset_Overlap	GO_VIRAL_LIFE_CYCLE (Geneset_Overlap_Data Set 1) GO_PROTEIN_LOCALIZATION_TO_ORGANELLE
RPS12|RPS25|RPL27|RPS3A|RPL6|RPL13A|RPS15A|VCP|KHSRP|RPL22|RPS14|RPS19|RPS4X|HSD17B10|TST|PSMA6|RPL7|RPS18|RPL10A|PRDX1|GOT2|RPS17|RPLP0|RPL21|RPL19|PABPC1|RPL15|RPS2|RPSA|UBA1|RPS11|UBE2N|RPL23|RPL11|KPNB1|RPLP2|HMGB1|HNRNPD|RPS13|RPL12|RPS23|RPS8|PSMA1|RPL31|RPS3|RPS9|RPS16|RPL18|RPL26|HSP90B1|RPS5|RPS6|HADHB|RPS7	54	0.4228502080443828	GO_RNA_BINDING (Geneset_Overlap_Data Set 1) GO_CELLULAR_CATABOLIC_PROCESS	false	Geneset_Overlap	GO_RNA_BINDING (Geneset_Overlap_Data Set 1) GO_CELLULAR_CATABOLIC_PROCESS
RPS12|RPS25|RPL27|RPS3A|RPL6|RPL13A|RPS15A|RPL22|RPS14|RPS19|RPS4X|FASN|EEF2|RPL7|RPS18|RPL10A|RPS17|RPLP0|RPL21|RPL19|PABPC1|RPL15|RPS2|EIF3A|RPSA|RPS11|RPL23|RPL11|RPLP2|RPS13|EIF3C|RPL12|RPS23|RPS8|RPL31|RPS3|RPS9|EIF5A|RPS16|RPL18|RPL26|RPS5|RPS6|RPS7|TUFM|EEF1A1	46	0.556265664160401	GO_RNA_BINDING (Geneset_Overlap_Data Set 1) GO_CELLULAR_AMIDE_METABOLIC_PROCESS	false	Geneset_Overlap	GO_RNA_BINDING (Geneset_Overlap_Data Set 1) GO_CELLULAR_AMIDE_METABOLIC_PROCESS
RPL27|RPL6|RPL13A|RPL22|RPL7|RPL10A|RPLP0|RPL21|RPL19|RPL15|RPL23|RPL11|RPLP2|RPL12|RPL31|RPL18|RPL26	17	0.5714285714285714	GO_RNA_BINDING (Geneset_Overlap_Data Set 1) GO_LARGE_RIBOSOMAL_SUBUNIT	false	Geneset_Overlap	GO_RNA_BINDING (Geneset_Overlap_Data Set 1) GO_LARGE_RIBOSOMAL_SUBUNIT
RPS12|RPS25|RPL27|RPS3A|RPL6|RPL13A|RPS15A|CCT4|RPL22|RPS14|RPS19|RPS4X|RPL7|RPS18|RPL10A|RPS17|RPLP0|RPL21|RPL19|RPL15|RPS2|RPSA|RPS11|RPL23|RPL11|RPLP2|RPS13|RPL12|RPS23|RPS8|RPL31|RPS3|RPS9|CCT3|RPS16|RPL18|RPL26|TCP1|RPS5|RPS6|RPS7	41	0.560875512995896	GO_RNA_BINDING (Geneset_Overlap_Data Set 1) GO_CYTOSOLIC_PART	false	Geneset_Overlap	GO_RNA_BINDING (Geneset_Overlap_Data Set 1) GO_CYTOSOLIC_PART
RPS12|RPS25|RPL27|RPS3A|RPL6|RPL13A|RPS15A|RPL22|RPS14|RPS19|RPS4X|EEF2|RPL7|RPS18|RPL10A|RPS17|RPLP0|RPL21|RPL19|PABPC1|RPL15|RPS2|EIF3A|RPSA|RPS11|RPL23|RPL11|RPLP2|RPS13|EIF3C|RPL12|RPS23|RPS8|RPL31|RPS3|RPS9|EIF5A|RPS16|RPL18|RPL26|RPS5|RPS6|RPS7|TUFM|EEF1A1	45	0.5748626373626373	GO_RNA_BINDING (Geneset_Overlap_Data Set 1) GO_PEPTIDE_METABOLIC_PROCESS	false	Geneset_Overlap	GO_RNA_BINDING (Geneset_Overlap_Data Set 1) GO_PEPTIDE_METABOLIC_PROCESS
RPS12|RPL27|RPS3A|RPL6|RPL13A|RPS15A|RPL22|RPS14|RPS19|RPS4X|RPL7|RPS18|RPL10A|RPS17|RPLP0|RPL21|RPL19|RPL15|RPS2|RPSA|RPS11|RPL23|RPL11|RPLP2|RPS13|RPL12|RPS23|RPS8|RPL31|RPS3|RPS9|RPS16|RPL18|RPL26|RPS5|RPS6|RPS7	37	0.6016260162601627	GO_RNA_BINDING (Geneset_Overlap_Data Set 1) GO_STRUCTURAL_CONSTITUENT_OF_RIBOSOME	false	Geneset_Overlap	GO_RNA_BINDING (Geneset_Overlap_Data Set 1) GO_STRUCTURAL_CONSTITUENT_OF_RIBOSOME
RPS12|RPS25|RPL27|RPS3A|RPL6|RPL13A|RPS15A|KHSRP|RPL22|RPS14|RPS19|RPS4X|RPL7|RPS18|RPL10A|RPS17|RPLP0|RPL21|RPL19|PABPC1|RPL15|RPS2|RPSA|RPS11|SYNCRIP|RPL23|C1QBP|RPL11|RPLP2|HNRNPD|RPS13|RPL12|RPS23|RPS8|HNRNPC|RPL31|HNRNPA3|RPS3|RPS9|RPS16|RPL18|RPL26|HNRNPA1|HNRNPL|RPS5|ELAVL1|RPS6|RPS7|HNRNPA2B1|HNRNPF|HNRNPK|HSPA8	52	0.7072327044025157	GO_RNA_BINDING (Geneset_Overlap_Data Set 1) GO_MRNA_METABOLIC_PROCESS	false	Geneset_Overlap	GO_RNA_BINDING (Geneset_Overlap_Data Set 1) GO_MRNA_METABOLIC_PROCESS
RPS12|RPS25|RPL27|RPS3A|RPL6|RPL13A|RPS15A|VCP|RPL22|RPS14|RPS19|RPS4X|XPO1|RPL7|RPS18|RPL10A|YWHAE|SND1|RPS17|RPLP0|PPIA|HSP90AB1|RPL21|RPL19|RPL15|RPS2|EIF3A|RPSA|RPS11|SYNCRIP|RPL23|C1QBP|PPIB|RPL11|KPNB1|RAN|NPM1|RPLP2|RPS13|RPL12|RPS23|RPS8|RPL31|RPS3|RPS9|RPS16|RPL18|RPL26|HSPD1|TCP1|HNRNPA1|VIM|RPS5|RPS6|RPS7|HNRNPK|HSPA8	57	0.5399252181138346	GO_RNA_BINDING (Geneset_Overlap_Data Set 1) GO_INTERSPECIES_INTERACTION_BETWEEN_ORGANISMS	false	Geneset_Overlap	GO_RNA_BINDING (Geneset_Overlap_Data Set 1) GO_INTERSPECIES_INTERACTION_BETWEEN_ORGANISMS
RPS12|RPS25|RPL27|RPS3A|RPL6|RPL13A|RPS15A|RPL22|RPS14|RPS19|RPS4X|RPL7|RPS18|RPL10A|RPS17|RPLP0|RPL21|RPL19|RPL15|RPS2|RPSA|RPS11|RPL23|RPL11|RPLP2|RPS13|RPL12|RPS23|RPS8|RPL31|RPS3|RPS9|RPS16|RPL18|RPL26|RPS5|RPS6|RPS7	38	0.6455128205128204	GO_RNA_BINDING (Geneset_Overlap_Data Set 1) GO_ESTABLISHMENT_OF_PROTEIN_LOCALIZATION_TO_ENDOPLASMIC_RETICULUM	false	Geneset_Overlap	GO_RNA_BINDING (Geneset_Overlap_Data Set 1) GO_ESTABLISHMENT_OF_PROTEIN_LOCALIZATION_TO_ENDOPLASMIC_RETICULUM
RPS12|RPS25|RPL27|RPS3A|RPL6|RPL13A|RPS15A|KHSRP|RPL22|RPS14|RPS19|RPS4X|RPL7|RPS18|RPL10A|RPS17|RPLP0|RPL21|RPL19|PABPC1|RPL15|RPS2|RPSA|RPS11|RPL23|RPL11|RPLP2|HNRNPD|RPS13|RPL12|RPS23|RPS8|RPL31|RPS3|RPS9|RPS16|RPL18|RPL26|RPS5|RPS6|RPS7	41	0.6589285714285714	GO_RNA_BINDING (Geneset_Overlap_Data Set 1) GO_RNA_CATABOLIC_PROCESS	false	Geneset_Overlap	GO_RNA_BINDING (Geneset_Overlap_Data Set 1) GO_RNA_CATABOLIC_PROCESS
RPS12|RPS25|RPL27|RPS3A|RPL6|RPL13A|RPS15A|VCP|KHSRP|RPL22|RPS14|RPS19|RPS4X|PSMA6|RPL7|RPS18|RPL10A|RPS17|RPLP0|RPL21|RPL19|PABPC1|RPL15|RPS2|RPSA|UBA1|RPS11|UBE2N|RPL23|RPL11|KPNB1|RPLP2|HMGB1|HNRNPD|RPS13|RPL12|RPS23|RPS8|PSMA1|RPL31|RPS3|RPS9|RPS16|RPL18|RPL26|HSP90B1|RPS5|RPS6|RPS7	49	0.5730994152046783	GO_RNA_BINDING (Geneset_Overlap_Data Set 1) GO_MACROMOLECULE_CATABOLIC_PROCESS	false	Geneset_Overlap	GO_RNA_BINDING (Geneset_Overlap_Data Set 1) GO_MACROMOLECULE_CATABOLIC_PROCESS
RPS12|RPS25|RPL27|RPS3A|RPL6|RPL13A|ATP5A1|RPS15A|RPL22|RPS14|RPS19|RPS4X|EEF2|RPL7|RPS18|RPL10A|GOT2|RPS17|RPLP0|RPL21|RPL19|PABPC1|RPL15|RPS2|EIF3A|RPSA|RPS11|RPL23|RPL11|RPLP2|ALDOA|RPS13|EIF3C|RPL12|RPS23|RPS8|RPL31|RPS3|RPS9|EIF5A|RPS16|RPL18|RPL26|RPS5|RPS6|RPS7|TUFM|EEF1A1	48	0.4687661331956634	GO_RNA_BINDING (Geneset_Overlap_Data Set 1) GO_ORGANONITROGEN_COMPOUND_BIOSYNTHETIC_PROCESS	false	Geneset_Overlap	GO_RNA_BINDING (Geneset_Overlap_Data Set 1) GO_ORGANONITROGEN_COMPOUND_BIOSYNTHETIC_PROCESS
RPS12|RPS25|RPL27|RPS3A|RPL6|RPL13A|RPS15A|KHSRP|RPL22|RPS14|RPS19|RPS4X|HSD17B10|RPL7|RPS18|RPL10A|RPS17|RPLP0|RPL21|RPL19|PABPC1|RPL15|RPS2|RPSA|RPS11|SYNCRIP|RPL23|C1QBP|RPL11|RPLP2|HNRNPD|RPS13|RPL12|RPS23|RPS8|HNRNPC|RPL31|HNRNPA3|RPS3|RPS9|RPS16|RPL18|RPL26|HNRNPA1|HNRNPL|RPS5|ELAVL1|RPS6|RPS7|HNRNPA2B1|HNRNPF|HNRNPK|HSPA8	53	0.7008264462809917	GO_RNA_BINDING (Geneset_Overlap_Data Set 1) GO_RNA_PROCESSING	false	Geneset_Overlap	GO_RNA_BINDING (Geneset_Overlap_Data Set 1) GO_RNA_PROCESSING
RPS12|RPS25|RPL27|RPS3A|RPL6|RPL13A|RPS15A|RPL22|RPS14|RPS19|RPS4X|RPL7|RPS18|RPL10A|RPS17|RPLP0|RPL21|RPL19|RPL15|RPS2|RPSA|RPS11|RPL23|RPL11|KPNB1|RAN|RPLP2|RPS13|RPL12|RPS23|RPS8|RPL31|RPS3|RPS9|HSP90AA1|RPS16|RPL18|RPL26|RPS5|RPS6|RPS7|HSPA8	42	0.5758272058823529	GO_RNA_BINDING (Geneset_Overlap_Data Set 1) GO_ESTABLISHMENT_OF_PROTEIN_LOCALIZATION_TO_ORGANELLE	false	Geneset_Overlap	GO_RNA_BINDING (Geneset_Overlap_Data Set 1) GO_ESTABLISHMENT_OF_PROTEIN_LOCALIZATION_TO_ORGANELLE
RPS12|RPS25|RPL27|RPS3A|RPL6|RPL13A|RPS15A|RPL22|RPS14|RPS19|RPS4X|RPL7|RPS18|RPL10A|RPS17|RPLP0|RPL21|RPL19|RPL15|RPS2|RPSA|RPS11|RPL23|RPL11|RPLP2|RPS13|RPL12|RPS23|RPS8|RPL31|RPS3|RPS9|RPS16|RPL18|RPL26|RPS5|RPS6|RPS7	38	0.6455128205128204	GO_RNA_BINDING (Geneset_Overlap_Data Set 1) GO_RRNA_METABOLIC_PROCESS	false	Geneset_Overlap	GO_RNA_BINDING (Geneset_Overlap_Data Set 1) GO_RRNA_METABOLIC_PROCESS
RPS12|RPS25|RPL27|RPS3A|RPL6|RPL13A|RPS15A|RPL22|RPS14|RPS19|RPS4X|RPL7|RPS18|RPL10A|RPS17|RPLP0|RPL21|RPL19|RPL15|RPS2|EIF3A|RPSA|RPS11|RPL23|RPL11|RPLP2|RPS13|RPL12|RPS23|RPS8|RPL31|RPS3|RPS9|RPS16|RPL18|RPL26|RPS5|RPS6|RPS7	39	0.65	GO_RNA_BINDING (Geneset_Overlap_Data Set 1) GO_MULTI_ORGANISM_METABOLIC_PROCESS	false	Geneset_Overlap	GO_RNA_BINDING (Geneset_Overlap_Data Set 1) GO_MULTI_ORGANISM_METABOLIC_PROCESS
RPS12|RPS25|RPL27|RPS3A|RPL6|RPL13A|RPS15A|RPL22|RPS14|RPS19|RPS4X|HSD17B10|RPL7|RPS18|RPL10A|RPS17|RPLP0|RPL21|RPL19|RPL15|RPS2|RPSA|RPS11|RPL23|RPL11|RPLP2|RPS13|RPL12|RPS23|RPS8|RPL31|RPS3|RPS9|RPS16|RPL18|RPL26|RPS5|RPS6|RPS7|HNRNPA2B1	40	0.6414797323888233	GO_RNA_BINDING (Geneset_Overlap_Data Set 1) GO_NCRNA_METABOLIC_PROCESS	false	Geneset_Overlap	GO_RNA_BINDING (Geneset_Overlap_Data Set 1) GO_NCRNA_METABOLIC_PROCESS
RPS12|RPS25|RPL27|RPS3A|RPL6|RPL13A|RPS15A|RPL22|RPS14|RPS19|RPS4X|EEF2|RPL7|RPS18|RPL10A|RPS17|RPLP0|RPL21|RPL19|PABPC1|RPL15|RPS2|EIF3A|RPSA|RPS11|RPL23|RPL11|RPLP2|RPS13|EIF3C|RPL12|RPS23|RPS8|RPL31|RPS3|RPS9|EIF5A|RPS16|RPL18|RPL26|RPS5|RPS6|RPS7|TUFM|EEF1A1	45	0.6211764705882352	GO_RNA_BINDING (Geneset_Overlap_Data Set 1) GO_AMIDE_BIOSYNTHETIC_PROCESS	false	Geneset_Overlap	GO_RNA_BINDING (Geneset_Overlap_Data Set 1) GO_AMIDE_BIOSYNTHETIC_PROCESS
RPS12|RPS25|RPL27|RPS3A|RPL6|RPL13A|RPS15A|RPL22|RPS14|RPS19|RPS4X|RPL7|RPS18|RPL10A|RPS17|RPLP0|RPL21|RPL19|RPL15|RPS2|RPSA|RPS11|RPL23|RPL11|RPLP2|RPS13|RPL12|RPS23|RPS8|RPL31|RPS3|RPS9|RPS16|RPL18|RPL26|RPS5|RPS6|RPS7	38	0.6320247933884298	GO_RNA_BINDING (Geneset_Overlap_Data Set 1) GO_RIBOSOMAL_SUBUNIT	false	Geneset_Overlap	GO_RNA_BINDING (Geneset_Overlap_Data Set 1) GO_RIBOSOMAL_SUBUNIT
RPS12|RPS25|RPL27|RPS3A|RPL6|RPL13A|RPS15A|RPL22|RPS14|RPS19|RPS4X|EEF2|RPL7|RPS18|RPL10A|RPS17|RPLP0|RPL21|RPL19|RPL15|RPS2|RPSA|RPS11|RPL23|RPL11|RPLP2|RPS13|RPL12|RPS23|RPS8|RPL31|RPS3|RPS9|RPS16|RPL18|CANX|RPL26|RPS5|RPS6|RPS7	40	0.6290507052992756	GO_RNA_BINDING (Geneset_Overlap_Data Set 1) GO_RIBOSOME	false	Geneset_Overlap	GO_RNA_BINDING (Geneset_Overlap_Data Set 1) GO_RIBOSOME
RPS12|RPS25|RPL27|RPS3A|RPL6|RPL13A|RPS15A|VCP|KHSRP|RPL22|RPS14|RPS19|RPS4X|HSD17B10|TST|PSMA6|RPL7|RPS18|RPL10A|PRDX1|GOT2|RPS17|RPLP0|RPL21|RPL19|PABPC1|RPL15|RPS2|RPSA|UBA1|RPS11|UBE2N|RPL23|RPL11|KPNB1|RPLP2|ALDOA|HMGB1|HNRNPD|RPS13|RPL12|RPS23|RPS8|PSMA1|RPL31|RPS3|RPS9|RPS16|RPL18|RPL26|HSP90B1|RPS5|RPS6|HADHB|RPS7	55	0.37736903271947075	GO_RNA_BINDING (Geneset_Overlap_Data Set 1) GO_CATABOLIC_PROCESS	false	Geneset_Overlap	GO_RNA_BINDING (Geneset_Overlap_Data Set 1) GO_CATABOLIC_PROCESS
RPS12|RPS25|RPL27|RPS3A|RPL6|RPL13A|RPS15A|DYNC1H1|RPL22|RPS14|RPS19|RPS4X|XPO1|RPL7|RPS18|RPL10A|RPS17|RPLP0|RPL21|RPL19|RPL15|RPS2|EIF3A|RPSA|RPS11|RPL23|C1QBP|RPL11|RAN|NPM1|RPLP2|RPS13|EIF3C|RPL12|RPS23|RPS8|RPL31|RPS3|RPS9|RPS16|RPL18|RPL26|RPS5|RPS6|RPS7	45	0.6766304347826086	GO_RNA_BINDING (Geneset_Overlap_Data Set 1) GO_RIBONUCLEOPROTEIN_COMPLEX_BIOGENESIS	false	Geneset_Overlap	GO_RNA_BINDING (Geneset_Overlap_Data Set 1) GO_RIBONUCLEOPROTEIN_COMPLEX_BIOGENESIS
RPL13A|KHSRP|RPS14|RPL7|RPS2|SYNCRIP|C1QBP|HNRNPD|RPS13|NCL|HNRNPC|HNRNPA3|RPS3|HSP90AA1|RPS5|ELAVL1|HNRNPA2B1|HNRNPK	18	0.5756302521008403	GO_RNA_BINDING (Geneset_Overlap_Data Set 1) GO_MRNA_BINDING	false	Geneset_Overlap	GO_RNA_BINDING (Geneset_Overlap_Data Set 1) GO_MRNA_BINDING
RPS12|RPS25|RPL27|RPS3A|RPL6|RPL13A|RPS15A|RPL22|RPS14|RPS19|RPS4X|XPO1|RPL7|RPS18|RPL10A|RPS17|RPLP0|RPL21|RPL19|RPL15|RPS2|RPSA|RPS11|RPL23|C1QBP|RPL11|RAN|NPM1|RPLP2|RPS13|RPL12|RPS23|RPS8|RPL31|RPS3|RPS9|RPS16|RPL18|RPL26|RPS5|RPS6|RPS7	42	0.6633720930232558	GO_RNA_BINDING (Geneset_Overlap_Data Set 1) GO_RIBOSOME_BIOGENESIS	false	Geneset_Overlap	GO_RNA_BINDING (Geneset_Overlap_Data Set 1) GO_RIBOSOME_BIOGENESIS
RPS25|RPS3A|RPL13A|RPS14|RPS19|XPO1|RPL7|RPL10A|RPL21|RPL19|PPP1CC|RPS2|EIF3A|RPS11|UBE2N|RPL23|C1QBP|RPL11|RAN|NPM1|RPS13|NCL|RPL12|RPS23|RPS3|RPS9|HSPA9|RPL18|RPS6|RPS7|EEF1A1|HSPA8	32	0.5372405372405372	GO_RNA_BINDING (Geneset_Overlap_Data Set 1) GO_NUCLEOLUS	false	Geneset_Overlap	GO_RNA_BINDING (Geneset_Overlap_Data Set 1) GO_NUCLEOLUS
RPS12|RPS25|RPL27|RPS3A|TRAP1|TPT1|RPL6|RPL13A|ATP5A1|RPS15A|VCP|DYNC1H1|CCT4|KHSRP|RPL22|RPS14|RPS19|RPS4X|FASN|HSD17B10|EEF2|HSPE1|PFN1|RPL7|LRPPRC|MAPRE1|RPS18|RPL10A|YWHAE|SND1|PRDX1|GOT2|MATR3|RPS17|RPLP0|RTN4|PPIA|HSP90AB1|RPL21|RPL19|PPP1CC|PABPC1|RPL15|RPS2|EIF3A|RPSA|UBA1|RPS11|SYNCRIP|UBE2N|RPL23|C1QBP|ANXA2|YWHAG|MYO5A|STXBP1|PPIB|SUMO2|RPL11|RPN1|KPNB1|SLC3A2|RAN|NPM1|ARF1|MDH2|ALDOA|…	111	0.9663865546218487	GO_RNA_BINDING (Geneset_Overlap_Data Set 1) GO_POLY_A_RNA_BINDING	false	Geneset_Overlap	GO_RNA_BINDING (Geneset_Overlap_Data Set 1) GO_POLY_A_RNA_BINDING
RPS12|RPS25|RPL27|RPS3A|RPL6|RPL13A|RPS15A|RPL22|RPS14|RPS19|RPS4X|RPL7|RPS18|RPL10A|RPS17|RPLP0|RPL21|RPL19|RPL15|RPS2|RPSA|RPS11|RPL23|RPL11|RPLP2|RPS13|RPL12|RPS23|RPS8|RPL31|RPS3|RPS9|RPS16|RPL18|RPL26|RPS5|RPS6|RPS7	38	0.6320247933884298	GO_RNA_BINDING (Geneset_Overlap_Data Set 1) GO_PROTEIN_LOCALIZATION_TO_ENDOPLASMIC_RETICULUM	false	Geneset_Overlap	GO_RNA_BINDING (Geneset_Overlap_Data Set 1) GO_PROTEIN_LOCALIZATION_TO_ENDOPLASMIC_RETICULUM
RPS12|RPS25|RPL27|RPS3A|RPL6|RPL13A|RPS15A|RPL22|RPS14|RPS19|RPS4X|HSD17B10|RPL7|RPS18|RPL10A|RPS17|RPLP0|RPL21|RPL19|RPL15|RPS2|RPSA|RPS11|RPL23|RPL11|RPLP2|RPS13|RPL12|RPS23|RPS8|RPL31|RPS3|RPS9|RPS16|RPL18|RPL26|RPS5|RPS6|RPS7|HNRNPA2B1	40	0.6544715447154471	GO_RNA_BINDING (Geneset_Overlap_Data Set 1) GO_NCRNA_PROCESSING	false	Geneset_Overlap	GO_RNA_BINDING (Geneset_Overlap_Data Set 1) GO_NCRNA_PROCESSING
RPS12|RPS25|RPL27|RPS3A|RPL6|RPL13A|RPS15A|RPL22|RPS14|RPS19|RPS4X|RPL7|RPS18|RPL10A|YWHAE|RPS17|RPLP0|RPL21|RPL19|RPL15|RPS2|RPSA|RPS11|RPL23|ANXA2|YWHAG|RPL11|KPNB1|RAN|RPLP2|RPS13|RPL12|RPS23|RPS8|RPL31|RPS3|RPS9|HSP90AA1|RPS16|RPL18|RPL26|RPS5|RPS6|RPS7|HSPA8	45	0.5835095137420719	GO_RNA_BINDING (Geneset_Overlap_Data Set 1) GO_PROTEIN_TARGETING	false	Geneset_Overlap	GO_RNA_BINDING (Geneset_Overlap_Data Set 1) GO_PROTEIN_TARGETING
RPS12|RPS25|RPL27|RPS3A|RPL6|RPL13A|RPS15A|RPL22|RPS14|RPS19|RPS4X|RPL7|RPS18|RPL10A|RPS17|RPLP0|RPL21|RPL19|RPL15|RPS2|RPSA|RPS11|RPL23|ANXA2|MYO5A|STXBP1|RPL11|RPLP2|RPS13|RPL12|RPS23|RPS8|RPL31|RPS3|RPS9|HSP90AA1|RPS16|RPL18|RPL26|RPS5|RPS6|RPS7	42	0.5409090909090909	GO_RNA_BINDING (Geneset_Overlap_Data Set 1) GO_PROTEIN_LOCALIZATION_TO_MEMBRANE	false	Geneset_Overlap	GO_RNA_BINDING (Geneset_Overlap_Data Set 1) GO_PROTEIN_LOCALIZATION_TO_MEMBRANE
RPS12|RPS25|RPL27|RPS3A|RPL6|RPL13A|RPS15A|RPL22|RPS14|RPS19|RPS4X|RPL7|RPS18|RPL10A|RPS17|RPLP0|RPL21|RPL19|PABPC1|RPL15|RPS2|RPSA|RPS11|RPL23|RPL11|RPLP2|RPS13|RPL12|RPS23|RPS8|RPL31|RPS3|RPS9|RPS16|RPL18|RPL26|RPS5|RPS6|RPS7	39	0.65	GO_RNA_BINDING (Geneset_Overlap_Data Set 1) GO_NUCLEAR_TRANSCRIBED_MRNA_CATABOLIC_PROCESS_NONSENSE_MEDIATED_DECAY	false	Geneset_Overlap	GO_RNA_BINDING (Geneset_Overlap_Data Set 1) GO_NUCLEAR_TRANSCRIBED_MRNA_CATABOLIC_PROCESS_NONSENSE_MEDIATED_DECAY
RPS12|RPS25|RPL27|RPS3A|RPL6|RPL13A|RPS15A|RPL22|RPS14|RPS19|RPS4X|RPL7|RPS18|RPL10A|RPS17|RPLP0|RPL21|RPL19|RPL15|RPS2|RPSA|RPS11|RPL23|ANXA2|RPL11|RPLP2|RPS13|RPL12|RPS23|RPS8|RPL31|RPS3|RPS9|RPS16|RPL18|RPL26|RPS5|RPS6|RPS7	39	0.6367667808909494	GO_RNA_BINDING (Geneset_Overlap_Data Set 1) GO_PROTEIN_TARGETING_TO_MEMBRANE	false	Geneset_Overlap	GO_RNA_BINDING (Geneset_Overlap_Data Set 1) GO_PROTEIN_TARGETING_TO_MEMBRANE
RPS12|RPS25|RPL27|RPS3A|RPL6|RPL13A|RPS15A|VCP|RPL22|RPS14|RPS19|RPS4X|XPO1|RPL7|RPS18|RPL10A|YWHAE|RPS17|RPLP0|RPL21|RPL19|RPL15|RPS2|RPSA|RPS11|RPL23|ANXA2|YWHAG|RPL11|KPNB1|RAN|NPM1|RPLP2|RPS13|RPL12|RPS23|RPS8|RPL31|RPS3|RPS9|EIF5A|CLTC|HSPA9|HSP90AA1|RPS16|RPL18|RPL26|HSP90B1|RPS5|RPS6|RPS7|HSPA8	52	0.49156981502700936	GO_RNA_BINDING (Geneset_Overlap_Data Set 1) GO_INTRACELLULAR_PROTEIN_TRANSPORT	false	Geneset_Overlap	GO_RNA_BINDING (Geneset_Overlap_Data Set 1) GO_INTRACELLULAR_PROTEIN_TRANSPORT
RPS12|RPS25|RPL27|RPS3A|RPL6|RPL13A|RPS15A|RPL22|RPS14|RPS19|RPS4X|RPL7|RPS18|RPL10A|RPS17|RPLP0|RPL21|RPL19|RPL15|RPS2|RPSA|RPS11|RPL23|ANXA2|RPL11|RPLP2|RPS13|RPL12|RPS23|RPS8|RPL31|RPS3|RPS9|HSP90AA1|RPS16|RPL18|RPL26|RPS5|RPS6|RPS7	40	0.5550387596899224	GO_RNA_BINDING (Geneset_Overlap_Data Set 1) GO_ESTABLISHMENT_OF_PROTEIN_LOCALIZATION_TO_MEMBRANE	false	Geneset_Overlap	GO_RNA_BINDING (Geneset_Overlap_Data Set 1) GO_ESTABLISHMENT_OF_PROTEIN_LOCALIZATION_TO_MEMBRANE
RPS4X|RPS5|RPS6|RPL31|RPS11|RPS2|RPL15|RPS8|RPL22|RPS14|RPS19|RPSA|RPS9|RPS18|RPL7|RPL10A|RPL23|RPS7|RPS3|RPS29|RPL11|RPS16|RPL18|RPL6|RPL13A|RPS12|RPL27|RPS3A|RPS15A|RPL12|RPS23|RPS17|RPL26|RPLP2|RPLP0|RPL19|RPS13|RPL21	38	0.6837121212121212	GO_ORGANIC_CYCLIC_COMPOUND_CATABOLIC_PROCESS (Geneset_Overlap_Data Set 1) GO_STRUCTURAL_MOLECULE_ACTIVITY	false	Geneset_Overlap	GO_ORGANIC_CYCLIC_COMPOUND_CATABOLIC_PROCESS (Geneset_Overlap_Data Set 1) GO_STRUCTURAL_MOLECULE_ACTIVITY
RPS4X|RPS5|RPS6|RPL31|RPS11|RPS2|RPL15|RPS8|RPL22|RPS14|RPS19|RPSA|RPS9|RPS18|RPL7|RPL10A|RPL23|RPS7|RPS3|RPS29|RPL11|RPS16|RPL18|RPL6|RPL13A|RPS12|RPS25|RPL27|RPS3A|RPS15A|RPL12|PABPC1|RPS23|RPS17|RPL26|RPLP2|RPLP0|RPL19|RPS13|RPL21	40	0.9166666666666667	GO_ORGANIC_CYCLIC_COMPOUND_CATABOLIC_PROCESS (Geneset_Overlap_Data Set 1) GO_NUCLEAR_TRANSCRIBED_MRNA_CATABOLIC_PROCESS_NONSENSE_MEDIATED_DECAY	false	Geneset_Overlap	GO_ORGANIC_CYCLIC_COMPOUND_CATABOLIC_PROCESS (Geneset_Overlap_Data Set 1) GO_NUCLEAR_TRANSCRIBED_MRNA_CATABOLIC_PROCESS_NONSENSE_MEDIATED_DECAY
RPS4X|RPS5|RPS6|RPL31|RPS11|RPS2|RPL15|RPS8|RPL22|RPS14|RPS19|RPSA|RPS9|RPS18|RPL7|APOE|RPL10A|RPL23|RPS7|RPS3|RPS29|RPL11|RPS16|RPL18|RPL6|RPL13A|RPS12|RPS25|RPL27|RPS3A|RPS15A|RPL12|RPS23|RPS17|RPL26|RPLP2|RPLP0|RPL19|RPS13|RPL21	40	0.7341269841269842	GO_ORGANIC_CYCLIC_COMPOUND_CATABOLIC_PROCESS (Geneset_Overlap_Data Set 1) GO_PROTEIN_LOCALIZATION_TO_MEMBRANE	false	Geneset_Overlap	GO_ORGANIC_CYCLIC_COMPOUND_CATABOLIC_PROCESS (Geneset_Overlap_Data Set 1) GO_PROTEIN_LOCALIZATION_TO_MEMBRANE
RPS4X|RPS5|RPS6|RPL31|RPS11|RPS2|RPL15|RPS8|RPL22|KHSRP|RPS14|RPS19|RPSA|RPS9|RPS18|RPL7|RPL10A|RPL23|RPS7|RPS3|RPS29|RPL11|RPS16|RPL18|RPL6|RPL13A|RPS12|RPS25|RPL27|RPS3A|RPS15A|RPL12|PABPC1|RPS23|RPS17|RPL26|RPLP2|RPLP0|HNRNPD|RPL19|RPS13|RPL21	42	0.9375	GO_ORGANIC_CYCLIC_COMPOUND_CATABOLIC_PROCESS (Geneset_Overlap_Data Set 1) GO_RNA_CATABOLIC_PROCESS	false	Geneset_Overlap	GO_ORGANIC_CYCLIC_COMPOUND_CATABOLIC_PROCESS (Geneset_Overlap_Data Set 1) GO_RNA_CATABOLIC_PROCESS
RPS4X|RPS5|RPS6|RPL31|RPS11|RPS2|RPL15|RPS8|RPL22|RPS14|RPS19|RPSA|RPS9|RPS18|RPL7|RPL10A|RPL23|RPS7|RPS3|RPS29|RPL11|RPS16|RPL18|RPL6|RPL13A|RPS12|RPS25|RPL27|RPS3A|RPS15A|RPL12|RPS23|RPS17|RPL26|RPLP2|RPLP0|RPL19|RPS13|RPL21	39	0.8284883720930232	GO_ORGANIC_CYCLIC_COMPOUND_CATABOLIC_PROCESS (Geneset_Overlap_Data Set 1) GO_RIBOSOME_BIOGENESIS	false	Geneset_Overlap	GO_ORGANIC_CYCLIC_COMPOUND_CATABOLIC_PROCESS (Geneset_Overlap_Data Set 1) GO_RIBOSOME_BIOGENESIS
RPS4X|RPS5|RPS6|RPL31|RPS11|RPS2|RPL15|RPS8|RPL22|KHSRP|RPS14|RPS19|RPSA|RPS9|RPS18|RPL7|RPL10A|RPL23|RPS7|RPS3|RPS29|RPL11|RPS16|RPL18|RPL6|RPL13A|RPS12|RPS25|RPL27|RPS3A|RPS15A|RPL12|PABPC1|RPS23|RPS17|RPL26|RPLP2|RPLP0|HNRNPD|RPL19|RPS13|RPL21	42	0.7934322033898304	GO_ORGANIC_CYCLIC_COMPOUND_CATABOLIC_PROCESS (Geneset_Overlap_Data Set 1) GO_MRNA_METABOLIC_PROCESS	false	Geneset_Overlap	GO_ORGANIC_CYCLIC_COMPOUND_CATABOLIC_PROCESS (Geneset_Overlap_Data Set 1) GO_MRNA_METABOLIC_PROCESS
RPL31|RPL15|RPL22|RPL7|RPL10A|RPL23|RPL11|RPL18|RPL6|RPL13A|RPL27|RPL12|RPL26|RPLP2|RPLP0|RPL19|RPL21	17	0.6770833333333334	GO_ORGANIC_CYCLIC_COMPOUND_CATABOLIC_PROCESS (Geneset_Overlap_Data Set 1) GO_LARGE_RIBOSOMAL_SUBUNIT	false	Geneset_Overlap	GO_ORGANIC_CYCLIC_COMPOUND_CATABOLIC_PROCESS (Geneset_Overlap_Data Set 1) GO_LARGE_RIBOSOMAL_SUBUNIT
RPS4X|RPS5|RPS6|RPL31|RPS11|RPS2|RPL15|RPS8|RPL22|RPS14|RPS19|RPSA|RPS9|RPS18|RPL7|RPL10A|RPL23|RPS7|RPS3|RPS29|RPL11|RPS16|RPL18|RPL6|RPL13A|RPS12|RPS25|RPL27|RPS3A|RPS15A|RPL12|PABPC1|RPS23|RPS17|RPL26|RPLP2|RPLP0|RPL19|RPS13|RPL21	40	0.7107843137254902	GO_ORGANIC_CYCLIC_COMPOUND_CATABOLIC_PROCESS (Geneset_Overlap_Data Set 1) GO_CELLULAR_AMIDE_METABOLIC_PROCESS	false	Geneset_Overlap	GO_ORGANIC_CYCLIC_COMPOUND_CATABOLIC_PROCESS (Geneset_Overlap_Data Set 1) GO_CELLULAR_AMIDE_METABOLIC_PROCESS
RPS6|RPS11|RPS2|RPS14|RPS19|RPS9|RPL7|RPL10A|RPL23|RPS7|RPS3|RPL11|RPL18|RPL13A|RPS25|RPS3A|RPL12|RPS23|RPL19|RPS13|RPL21	21	0.42832167832167833	GO_ORGANIC_CYCLIC_COMPOUND_CATABOLIC_PROCESS (Geneset_Overlap_Data Set 1) GO_NUCLEOLUS	false	Geneset_Overlap	GO_ORGANIC_CYCLIC_COMPOUND_CATABOLIC_PROCESS (Geneset_Overlap_Data Set 1) GO_NUCLEOLUS
RPS4X|RPS5|RPS6|RPL31|RPS11|RPS2|RPL15|RPS8|RPL22|RPS14|RPS19|RPSA|RPS9|RPS18|RPL7|RPL10A|RPL23|RPS7|RPS3|RPS29|RPL11|RPS16|RPL18|RPL6|RPL13A|RPS12|RPS25|RPL27|RPS3A|RPS15A|RPL12|RPS23|RPS17|RPL26|RPLP2|RPLP0|RPL19|RPS13|RPL21	39	0.8466386554621849	GO_ORGANIC_CYCLIC_COMPOUND_CATABOLIC_PROCESS (Geneset_Overlap_Data Set 1) GO_NCRNA_METABOLIC_PROCESS	false	Geneset_Overlap	GO_ORGANIC_CYCLIC_COMPOUND_CATABOLIC_PROCESS (Geneset_Overlap_Data Set 1) GO_NCRNA_METABOLIC_PROCESS
RPS4X|RPS5|RPS6|RPL31|RPS11|RPS2|RPL15|RPS8|RPL22|RPS14|RPS19|RPSA|RPS9|RPS18|RPL7|RPL10A|RPL23|RPS7|RPS3|RPS29|RPL11|RPS16|RPL18|RPL6|RPL13A|RPS12|RPS25|RPL27|RPS3A|RPS15A|RPL12|RPS23|RPS17|RPL26|RPLP2|RPLP0|RPL19|RPS13|RPL21	39	0.7784584980237155	GO_ORGANIC_CYCLIC_COMPOUND_CATABOLIC_PROCESS (Geneset_Overlap_Data Set 1) GO_RIBONUCLEOPROTEIN_COMPLEX_BIOGENESIS	false	Geneset_Overlap	GO_ORGANIC_CYCLIC_COMPOUND_CATABOLIC_PROCESS (Geneset_Overlap_Data Set 1) GO_RIBONUCLEOPROTEIN_COMPLEX_BIOGENESIS
RPS4X|RPS5|RPS6|RPL31|RPS11|RPS2|RPL15|RPS8|YWHAH|RPL22|KHSRP|RPS14|RPS19|RPSA|RPS9|RPS18|RPL7|APOE|RPL10A|RPL23|RPS7|RPS3|RPS29|RPL11|RPS16|KPNB1|RPL18|RPL6|RPL13A|RPS12|RPS25|RPL27|RPS3A|GOT2|RPS15A|RPL12|VCP|PABPC1|RPS23|RPS17|RPL26|RPLP2|RPLP0|HMGB1|HNRNPD|RPL19|RPS13|RPL21	48	0.6935483870967742	GO_ORGANIC_CYCLIC_COMPOUND_CATABOLIC_PROCESS (Geneset_Overlap_Data Set 1) GO_CATABOLIC_PROCESS	false	Geneset_Overlap	GO_ORGANIC_CYCLIC_COMPOUND_CATABOLIC_PROCESS (Geneset_Overlap_Data Set 1) GO_CATABOLIC_PROCESS
RPS4X|RPS5|RPS6|RPL31|RPS11|RPS2|RPL15|RPS8|RPL22|RPS14|RPS19|RPSA|RPS9|RPS18|RPL7|RPL10A|RPL23|RPS7|RPS3|RPS29|RPL11|RPS16|RPL18|RPL6|RPL13A|RPS12|RPS25|RPL27|RPS3A|RPS15A|RPL12|RPS23|RPS17|RPL26|RPLP2|RPLP0|RPL19|RPS13|RPL21	39	0.8854591836734693	GO_ORGANIC_CYCLIC_COMPOUND_CATABOLIC_PROCESS (Geneset_Overlap_Data Set 1) GO_RIBOSOMAL_SUBUNIT	false	Geneset_Overlap	GO_ORGANIC_CYCLIC_COMPOUND_CATABOLIC_PROCESS (Geneset_Overlap_Data Set 1) GO_RIBOSOMAL_SUBUNIT
RPS4X|RPS5|RPS6|RPL31|RPS11|RPS2|RPL15|RPS8|RPL22|KHSRP|RPS14|RPS19|RPSA|RPS9|RPS18|RPL7|RPL10A|RPL23|RPS7|RPS3|RPL11|RPS16|KPNB1|RPL6|RPL13A|RPS12|RPS25|RPL27|RPS3A|GOT2|RPS15A|RPL12|VCP|PABPC1|RPS23|RPS17|RPL26|RPLP0|HMGB1|HNRNPD|RPL19|RPS13|RPL21	43	0.6332614942528736	GO_ORGANIC_CYCLIC_COMPOUND_CATABOLIC_PROCESS (Geneset_Overlap_Data Set 1) GO_POLY_A_RNA_BINDING	false	Geneset_Overlap	GO_ORGANIC_CYCLIC_COMPOUND_CATABOLIC_PROCESS (Geneset_Overlap_Data Set 1) GO_POLY_A_RNA_BINDING
RPS4X|RPS5|RPS6|RPL31|RPS11|RPS2|RPL15|RPS8|RPL22|KHSRP|RPS14|RPS19|RPSA|RPS9|RPS18|RPL7|RPL10A|RPL23|RPS7|RPS3|RPL11|RPS16|KPNB1|RPL18|RPL6|RPL13A|RPS12|RPS25|RPL27|RPS3A|GOT2|RPS15A|RPL12|VCP|PABPC1|RPS23|RPS17|RPL26|RPLP2|RPLP0|HMGB1|HNRNPD|RPL19|RPS13|RPL21	45	0.6531762295081968	GO_ORGANIC_CYCLIC_COMPOUND_CATABOLIC_PROCESS (Geneset_Overlap_Data Set 1) GO_RNA_BINDING	false	Geneset_Overlap	GO_ORGANIC_CYCLIC_COMPOUND_CATABOLIC_PROCESS (Geneset_Overlap_Data Set 1) GO_RNA_BINDING
RPS4X|RPS5|RPS6|RPL31|RPS11|RPS2|RPL15|RPS8|RPL22|RPS14|RPS19|RPSA|RPS9|RPS18|RPL7|RPL10A|RPL23|RPS7|RPS3|RPS29|RPL11|RPS16|RPL18|RPL6|RPL13A|RPS12|RPS25|RPL27|RPS3A|RPS15A|RPL12|PABPC1|RPS23|RPS17|RPL26|RPLP2|RPLP0|RPL19|RPS13|RPL21	40	0.7291666666666667	GO_ORGANIC_CYCLIC_COMPOUND_CATABOLIC_PROCESS (Geneset_Overlap_Data Set 1) GO_PEPTIDE_METABOLIC_PROCESS	false	Geneset_Overlap	GO_ORGANIC_CYCLIC_COMPOUND_CATABOLIC_PROCESS (Geneset_Overlap_Data Set 1) GO_PEPTIDE_METABOLIC_PROCESS
RPS4X|RPS5|RPS6|RPL31|RPS11|RPS2|RPL15|RPS8|RPL22|RPS14|RPS19|RPSA|RPS9|RPS18|RPL7|RPL10A|RPL23|RPS7|RPS3|RPS29|RPL11|RPS16|RPL18|RPL6|RPL13A|RPS12|RPL27|RPS3A|RPS15A|RPL12|RPS23|RPS17|RPL26|RPLP2|RPLP0|RPL19|RPS13|RPL21	38	0.8359636537541846	GO_ORGANIC_CYCLIC_COMPOUND_CATABOLIC_PROCESS (Geneset_Overlap_Data Set 1) GO_STRUCTURAL_CONSTITUENT_OF_RIBOSOME	false	Geneset_Overlap	GO_ORGANIC_CYCLIC_COMPOUND_CATABOLIC_PROCESS (Geneset_Overlap_Data Set 1) GO_STRUCTURAL_CONSTITUENT_OF_RIBOSOME
RPS4X|RPS5|RPS6|RPL31|RPS11|RPS2|RPL15|RPS8|RPL22|RPS14|RPS19|RPSA|RPS9|RPS18|RPL7|RPL10A|RPL23|RPS7|RPS3|RPS29|RPL11|RPS16|RPL18|RPL6|RPL13A|RPS12|RPS25|RPL27|RPS3A|RPS15A|RPL12|RPS23|RPS17|RPL26|RPLP2|RPLP0|RPL19|RPS13|RPL21	39	0.90625	GO_ORGANIC_CYCLIC_COMPOUND_CATABOLIC_PROCESS (Geneset_Overlap_Data Set 1) GO_RRNA_METABOLIC_PROCESS	false	Geneset_Overlap	GO_ORGANIC_CYCLIC_COMPOUND_CATABOLIC_PROCESS (Geneset_Overlap_Data Set 1) GO_RRNA_METABOLIC_PROCESS
RPS4X|RPS5|RPS6|RPL31|RPS11|RPS2|RPL15|RPS8|RPL22|RPS14|RPS19|RPSA|RPS9|RPS18|RPL7|RPL10A|RPL23|RPS7|RPS3|RPS29|RPL11|RPS16|RPL18|RPL6|RPL13A|RPS12|RPS25|RPL27|RPS3A|RPS15A|RPL12|RPS23|RPS17|RPL26|RPLP2|RPLP0|RPL19|RPS13|RPL21	39	0.8854591836734693	GO_ORGANIC_CYCLIC_COMPOUND_CATABOLIC_PROCESS (Geneset_Overlap_Data Set 1) GO_MULTI_ORGANISM_METABOLIC_PROCESS	false	Geneset_Overlap	GO_ORGANIC_CYCLIC_COMPOUND_CATABOLIC_PROCESS (Geneset_Overlap_Data Set 1) GO_MULTI_ORGANISM_METABOLIC_PROCESS
[truncated: 163 more rows]
