# Supplementary figures and images for: CB1-receptor-mediated inhibitory LTD triggers presynaptic remodeling via protein synthesis and ubiquitination
Source: eLife journal article supplement (doi:10.7554/elife.54812), 2020-09-09

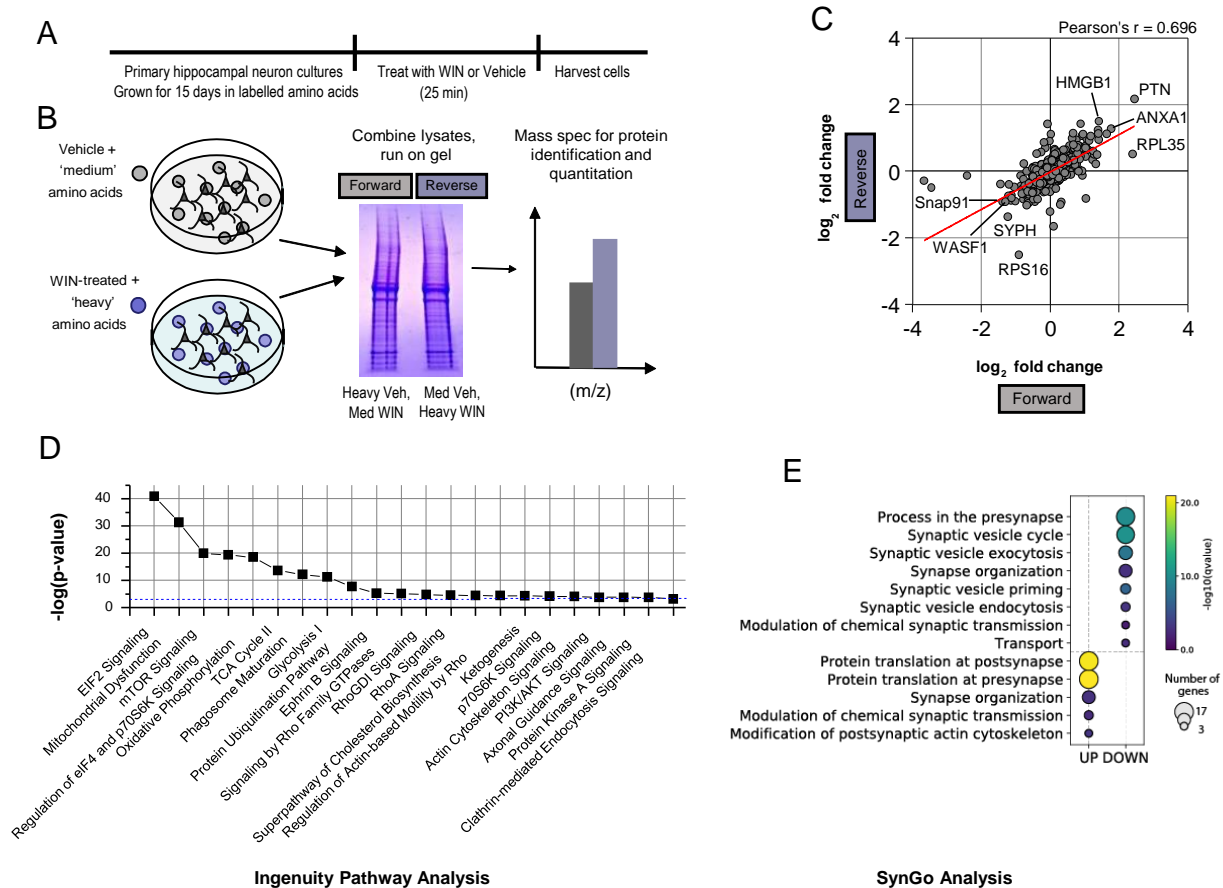

Monday et al.  
Figure 2 – figure supplement 1

Supplement: supp [file elife-54812-supp-v1.zip]

A

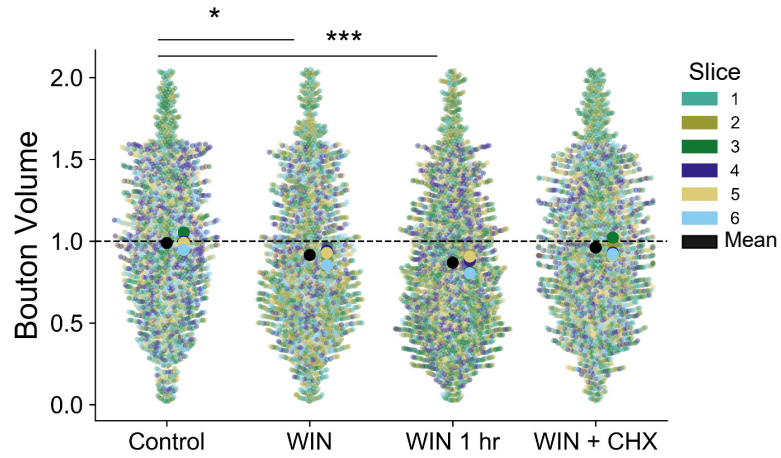

B

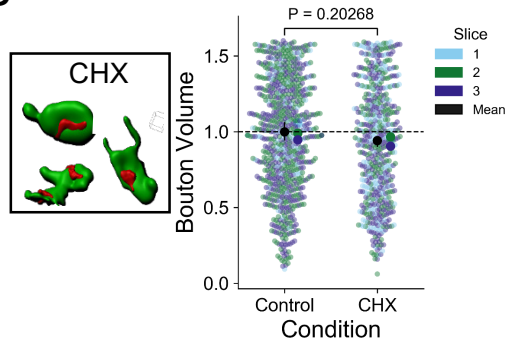

C

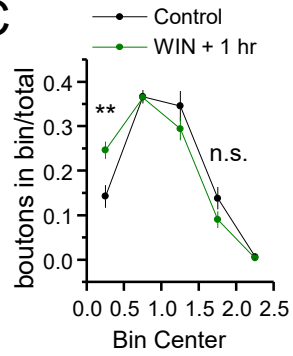

D

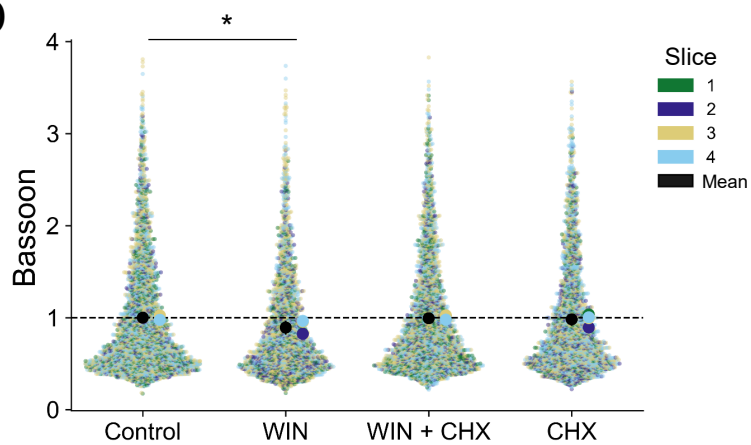

Monday et al.  
Figure 1 – figure supplement 1

Supplement: supp [file elife-54812-supp-v1.zip › elife_poa_e54812_Figure_1_figure_supplement_1.pdf]

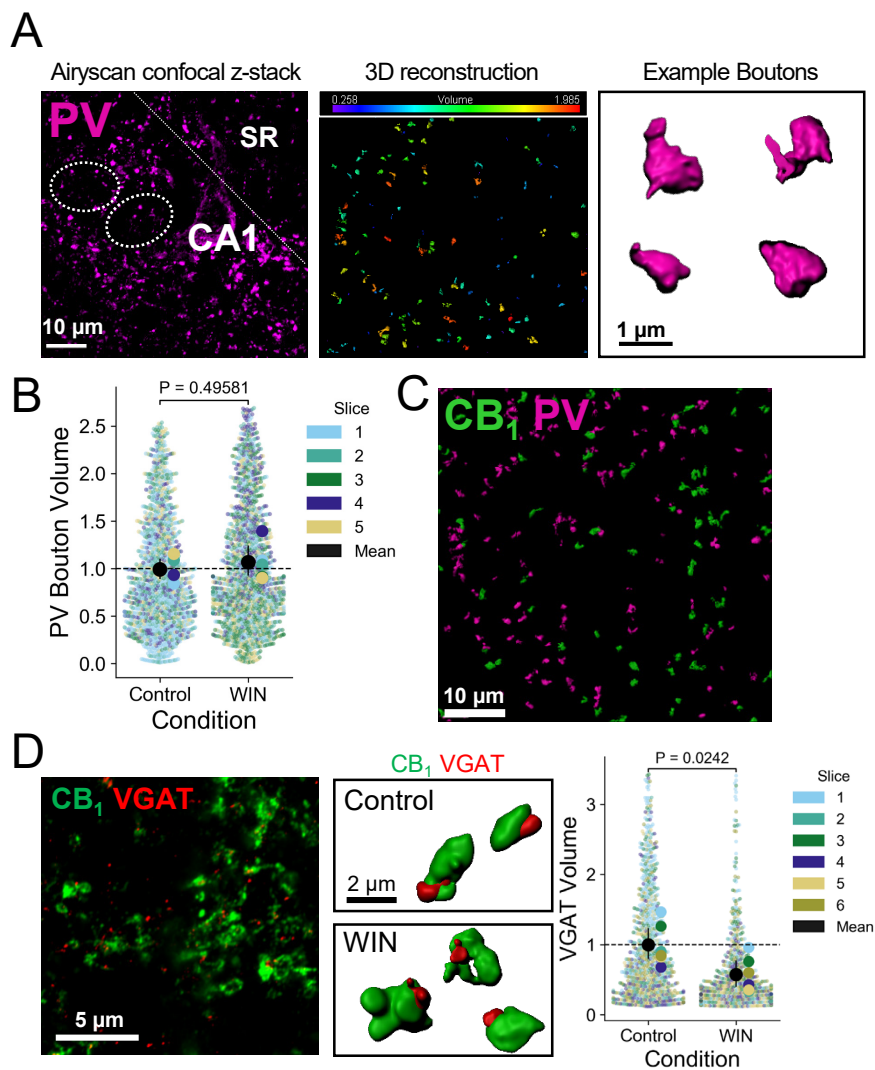

Monday et al.  
Figure 1 – figure supplement 2

Supplement: supp [file elife-54812-supp-v1.zip › elife_poa_e54812_Figure_1_figure_supplement_2.pdf]

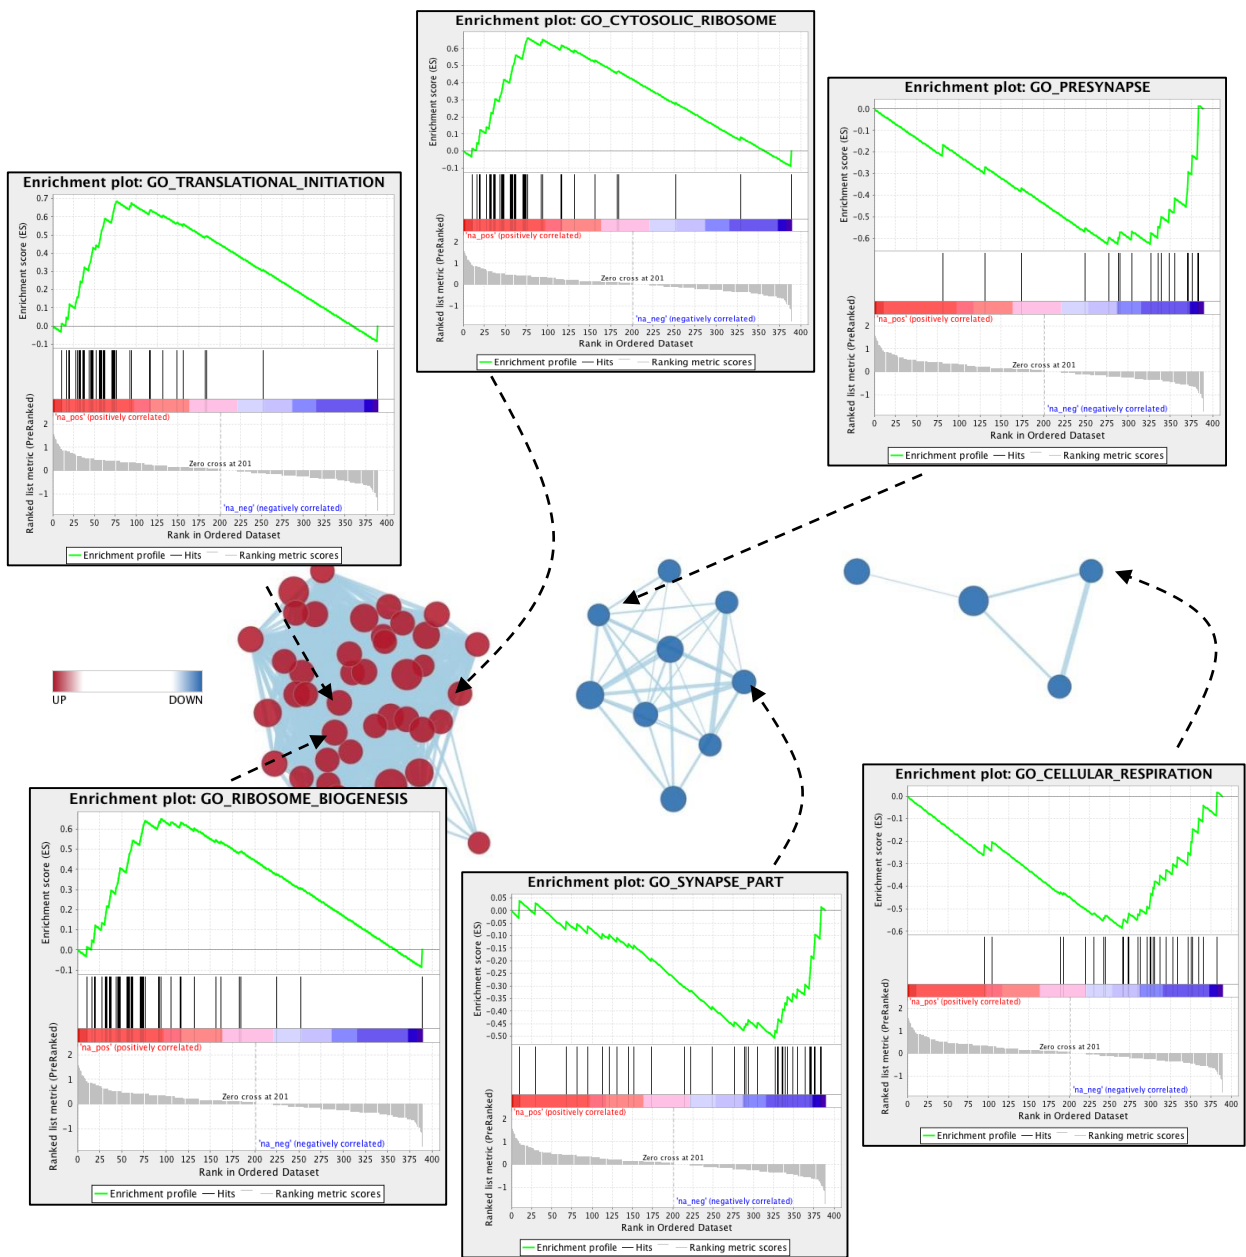

Monday et al.  
Figure 2 – figure supplement 2

Supplement: supp [file elife-54812-supp-v1.zip › elife_poa_e54812_Figure_2_figure_supplement_2.pdf]

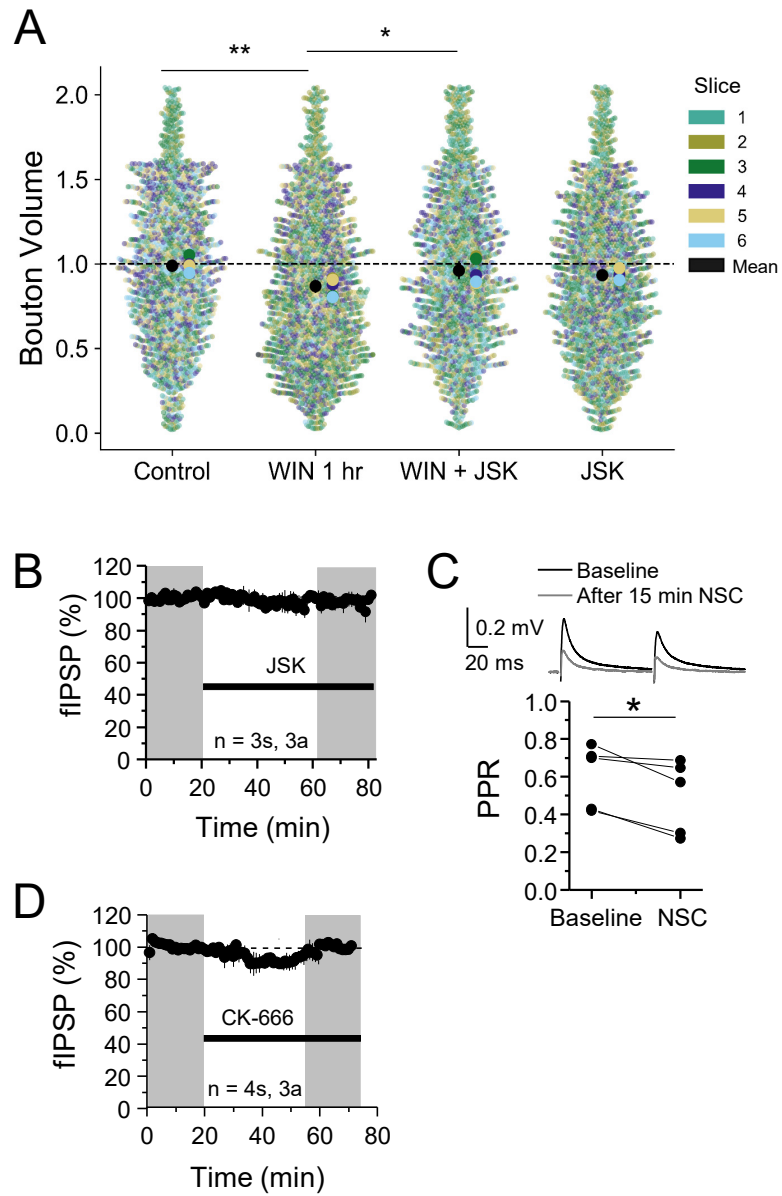

Monday et al.  
Figure 3 – figure supplement 1

Supplement: supp [file elife-54812-supp-v1.zip › elife_poa_e54812_Figure_3_figure_supplement_1.pdf]

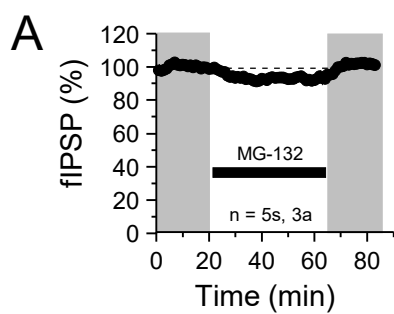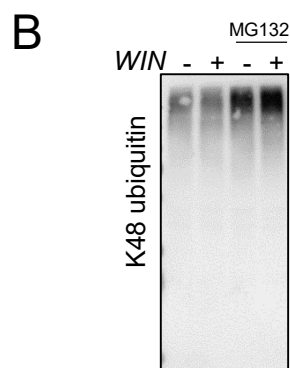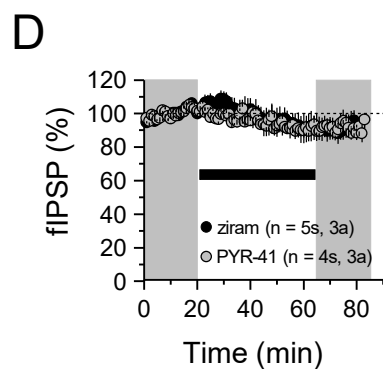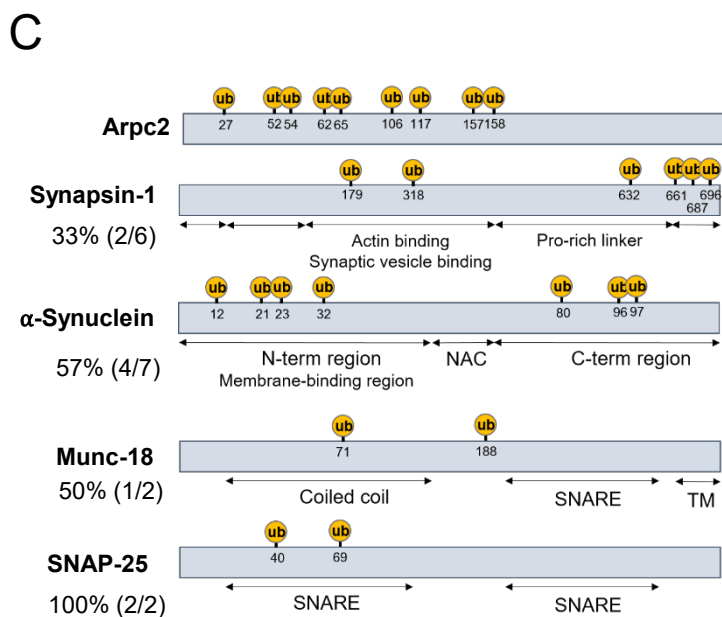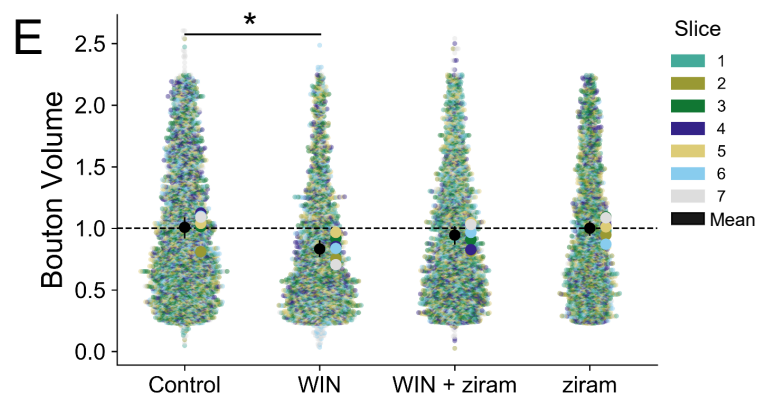

Monday et al.  
Figure 5 – figure supplement 1

Supplement: supp [file elife-54812-supp-v1.zip › elife_poa_e54812_Figure_5_figure_supplement_1.pdf]
